# Supplementary material for: Comparative Transcriptomic and Epigenomic Analyses Reveal New Regulators of Murine Brown Adipogenesis
Source: PLoS Genet. 2016 Dec 6;12(12):e1006474. doi: 10.1371/journal.pgen.1006474 (PMC5140063; doi:10.1371/journal.pgen.1006474)
Supplement: S2 Table — (XLSX) [file pgen.1006474.s014.xlsx]

## Sheet: Coding genes expression
Gene	BA d-3 re1	BA d0 re1	BA 6h re1	BA d2 re1	BA d7 re1	BA d-3 re2	BA d0 re2	BA 6h re2	BA d2 re2	BA d7 re2	BA d-3 avg	BA d0 avg	BA 6h avg	BA d2 avg	BA d7 avg	WA d-4	WA d-2	WA d0	WA 6h	WA d2	WA d7	pri BA	pri WA	BAT	WAT
0610005C13Rik	0	0.096855	0.198895	0.126842	0.248744	0	0.205187	0	0.488411	0.355276	0	0.151021	0.0994475	0.307627	0.30201	0.0742488	0.150498	0.0409157	0.140596	0	0.632895	0	0	0.34499	0.0615747
0610007N19Rik	NA	NA	NA	NA	NA	NA	NA	NA	NA	NA	NA	NA	NA	NA	NA	NA	NA	NA	NA	NA	NA	2.797	11.8864	3.37017	13.6246
0610007P14Rik	36.6898	41.1487	34.526	18.1115	28.937	42.6449	57.9875	43.0272	23.3644	29.9975	39.6673	49.5681	38.7766	20.738	29.4672	34.949	69.7835	24.9188	17.9693	18.8364	36.3147	4.98207	4.88594	5.14394	9.19378
0610008F07Rik	NA	NA	NA	NA	NA	NA	NA	NA	NA	NA	NA	NA	NA	NA	NA	NA	NA	NA	NA	NA	NA	0	0	0	0
0610009B14Rik	NA	NA	NA	NA	NA	NA	NA	NA	NA	NA	NA	NA	NA	NA	NA	NA	NA	NA	NA	NA	NA	0	0	0	0
0610009B22Rik	0.735453	2.70777	6.02388	8.92657	8.75273	2.99451	3.18689	2.6555	4.28916	6.56686	1.86498	2.94733	4.33969	6.60787	7.65979	11.6762	12.1257	11.7053	11.5012	18.9552	23.3072	11.3853	7.31196	10.0791	15.1111
0610009D07Rik	NA	NA	NA	NA	NA	NA	NA	NA	NA	NA	NA	NA	NA	NA	NA	NA	NA	NA	NA	NA	NA	10.1941	11.9199	13.7174	21.5547
0610009L18Rik	1.2567	1.28524	0.439882	0.651846	2.98271	0.581459	3.74383	1.89065	0.334661	1.95574	0.91908	2.51453	1.16527	0.493254	2.46922	1.31369	1.66423	1.94457	0.561963	1.60424	0.81037	2.58009	1.96802	5.14989	4.00816
0610009O20Rik	30.5642	30.7664	21.5763	38.9281	59.772	18.1338	22.1294	16.0358	33.6008	50.7305	24.349	26.4479	18.806	36.2644	55.2512	11.2288	13.0885	11.8756	4.78957	12.7753	18.0622	18.122	13.2871	13.9452	13.7571
0610010F05Rik	0.927803	0.316293	0.626321	1.32916	1.84257	1.34918	0.478618	0.341838	1.28832	1.35365	1.13849	0.397456	0.484079	1.30874	1.59811	6.55533	4.35304	3.63308	2.70102	4.06076	5.83522	1.66753	1.75429	2.00345	7.85404
0610010K14Rik	114.722	100.597	131.499	57.6181	43.2775	93.6032	104.121	136.836	36.9676	38.7989	104.163	102.359	134.167	47.2929	41.0382	35.9388	33.9063	34.1733	26.9779	33.9262	29.0654	2.69237	4.38748	18.1227	16.425
0610011F06Rik	12.03	9.22745	4.66203	12.1827	16.3158	8.87932	12.7219	8.49527	6.86488	10.6146	10.4547	10.9747	6.57865	9.52379	13.4652	10.4422	11.2087	11.0169	6.36758	12.0661	7.40482	25.8997	16.7409	24.2451	13.3426
0610012G03Rik	23.0564	22.8081	28.9671	47.1964	76.3843	30.3528	25.1333	19.036	34.1535	60.1217	26.7046	23.9707	24.0016	40.675	68.253	23.3488	21.9186	20.6142	14.0976	19.2396	26.822	42.5401	19.1521	35.5237	10.8163
0610012H03Rik	NA	NA	NA	NA	NA	NA	NA	NA	NA	NA	NA	NA	NA	NA	NA	NA	NA	NA	NA	NA	NA	0.171099	0	0.160572	0
0610030E20Rik	1.88422	3.17729	3.3224	3.07745	3.53708	2.85153	3.10184	3.62114	3.38891	3.24153	2.36788	3.13957	3.47177	3.23318	3.3893	4.81901	6.2666	7.68649	4.28917	5.47463	10.4341	3.529	3.48732	5.13446	9.19685
0610031J06Rik	NA	NA	NA	NA	NA	NA	NA	NA	NA	NA	NA	NA	NA	NA	NA	NA	NA	NA	NA	NA	NA	26.4803	27.3731	36.0829	48.8748
0610031O16Rik	0	0	0	0	0	0	0	0	0	0.0818271	0	0	0	0	0.0409135	0	0	0.0464914	0	0	0	0.192105	0	0	0
0610037L13Rik	10.7145	13.6643	11.7934	10.1777	11.7522	13.5584	15.0333	11.5278	7.83795	7.79733	12.1364	14.3488	11.6606	9.00783	9.77477	9.33646	11.1547	9.63081	6.30861	7.02006	7.1513	12.2174	14.8468	10.4847	9.97893
0610038B21Rik	0.419783	0.0709397	0.276868	3.8e-08	0.0700531	0.125754	0.29639	0.0950363	0.0562542	1.54e-09	0.272769	0.183665	0.185952	0.0281271	0.0350266	0.193328	0.333962	0.394296	0.189746	0.346356	0.172159	0.195176	0.641801	0.0277619	0.181518
0610038L08Rik	NA	NA	NA	NA	NA	NA	NA	NA	NA	NA	NA	NA	NA	NA	NA	NA	NA	NA	NA	NA	NA	4.92303e-10	2.67526e-10	1.25758e-09	0.039463
0610039K10Rik	1.49e-08	0.663086	2.63e-08	9.45e-08	0.261241	2.41e-09	0.280823	0.245589	5.17e-09	0.073937	8.67099e-09	0.471954	0.122795	4.9839e-08	0.167589	2.01112e-08	0.0497903	0.0830143	5.82037e-09	0.0985914	0.0886306	1.61543e-07	0.493524	0.100685	0.196493
0610040B10Rik	0	0.37658	1.54664	1.52794	3.74546	0	3.19113	3.5612	0.294169	4.94244	0	1.78385	2.55392	0.911054	4.34395	1.0104	3.21832	3.78487	1.12907	2.53824	2.9788	2.51408	0.986226	12.1704	5.00665
0610040F04Rik	2.33e-09	9.79e-10	1.56e-10	6.16e-10	4.46e-09	2.8e-09	0.0322349	4.34e-10	1.94e-10	1.26e-09	2.56394e-09	0.0161174	2.94914e-10	4.04558e-10	2.86188e-09	1.33364e-09	2.42175e-10	1.90153e-10	0.0574476	3.64899e-10	7.034e-10	0	0	0.0460305	5.57574e-09
0610040J01Rik	0	0	0	0	0	0	0	0	0	0	0	0	0	0	0	0.0204577	0	0	0	0	0	0	0	0	0.157688
0610043K17Rik	0	0	0	0	0	0	0	0	0	0	0	0	0	0	0	0	0.0834125	0.20885	0.0804742	0	0.0738479	0.287367	1.12729	1.43868	0.634395
1010001N08Rik	0.209398	0.780477	0.526366	0.386176	0.18932	0	0.302454	0.240016	0.148704	0.232773	0.104699	0.541466	0.383191	0.26744	0.211046	0.761701	0.157474	1.66833	0.270683	1.85424	2.4308	NA	NA	NA	NA
1100001G20Rik	NA	NA	NA	NA	NA	NA	NA	NA	NA	NA	NA	NA	NA	NA	NA	NA	NA	NA	NA	NA	NA	9.12756	70.6169	0.449061	50.1201
1110001A16Rik	NA	NA	NA	NA	NA	NA	NA	NA	NA	NA	NA	NA	NA	NA	NA	NA	NA	NA	NA	NA	NA	3.27231	0.99309	7.63376	5.77222
1110001J03Rik	17.5998	6.37486	5.39041	31.1907	73.8474	14.2506	9.93023	8.03801	19.0404	57.7753	15.9252	8.15254	6.71421	25.1155	65.8114	19.2603	23.1616	17.0209	7.5891	19.7991	46.686	220.811	56.4701	114.54	21.0501
1110002L01Rik	0.122852	0.334097	0.2698	0.845388	0.226417	0.964594	0.269513	0.218633	1.10366	0.504894	0.543723	0.301805	0.244217	0.974524	0.365656	7.21493	3.13351	1.86593	3.37804	4.92024	4.1276	1.01074	0.324491	0.515062	1.26196
1110003E01Rik	NA	NA	NA	NA	NA	NA	NA	NA	NA	NA	NA	NA	NA	NA	NA	NA	NA	NA	NA	NA	NA	17.7662	23.6461	NA	NA
1110004E09Rik	5.52998	4.82117	3.71266	4.70227	6.27055	11.7447	4.59122	4.20852	5.17839	6.45455	8.63734	4.7062	3.96059	4.94033	6.36255	14.2031	10.3367	8.23628	9.62507	8.19342	10.6819	10.1924	7.07014	7.12553	7.71547
1110004F10Rik	7.05125	23.9389	20.4577	12.8954	13.4576	15.6063	15.4742	14.3423	12.6604	7.29684	11.3288	19.7066	17.4	12.7779	10.3772	48.9279	44.3887	41.0966	36.5281	42.6493	26.2588	19.341	23.4653	14.7677	26.7971
1110006O24Rik	5.54869	5.20184	5.98848	7.8348	6.42799	3.28046	4.5917	7.05585	5.41796	4.13769	4.41458	4.89677	6.52217	6.62638	5.28284	2.1147	3.55157	4.29293	2.00862	6.78805	5.36703	1.26679	0.82823	2.36081	2.56144
1110007C09Rik	83.0189	46.5272	33.4713	28.8581	67.0559	68.109	72.2778	60.8144	15.6261	56.0593	75.564	59.4025	47.1429	22.2421	61.5576	33.339	31.2555	21.1859	20.4362	10.1539	12.0267	33.9424	29.0048	32.9959	23.7131
1110008F13Rik	78.3048	61.3764	126.362	298.467	443.777	162.678	66.3603	106.079	251.792	379.26	120.491	63.8683	116.221	275.13	411.519	127.116	82.6291	54.7654	106.346	104.476	122.683	82.184	32.3779	109.817	34.505
1110008J03Rik	NA	NA	NA	NA	NA	NA	NA	NA	NA	NA	NA	NA	NA	NA	NA	NA	NA	NA	NA	NA	NA	2.76095	3.89319	5.41079	3.11451
1110008L16Rik	1.4924	4.44154	2.72685	3.1145	5.99077	2.79484	3.80117	3.37696	4.29924	4.67192	2.14362	4.12136	3.05191	3.70687	5.33134	3.23887	3.16893	2.95372	2.64691	3.82405	3.78614	1.30599	1.46745	3.18084	3.82859
1110008P14Rik	140.076	94.5897	144.07	329.247	242.029	96.0633	151.954	201.295	454.836	235.277	118.07	123.272	172.683	392.041	238.653	91.0164	78.4443	64.2614	117.751	225.086	227.381	86.6924	41.9945	116.404	44.7409
1110012L19Rik	4.84116	9.12049	12.6824	5.81517	7.4125	8.06381	11.6206	15.2128	5.08898	6.75092	6.45249	10.3705	13.9476	5.45207	7.08171	15.9012	26.299	19.0937	15.5283	10.6751	14.9128	4.05182	5.54939	6.67571	8.3918
1110015O18Rik	0	0	0	0	0	0	0	0	0	0	0	0	0	0	0	0	0	0	0	0	0	0	0	0	0
1110017D15Rik	0.613482	0.262871	1.74071	0	0	0.830397	0.719602	0.261943	0.492413	0.0746061	0.721939	0.491237	1.00133	0.246206	0.037303	0.360707	0.244872	0.408018	0.223334	0.192467	0.134899	0	2.86887e-25	0.371779	0
1110018G07Rik	NA	NA	NA	NA	NA	NA	NA	NA	NA	NA	NA	NA	NA	NA	NA	NA	NA	NA	NA	NA	NA	6.23087	4.87956	5.95851	7.34393
1110019D14Rik	0.268754	0.274859	0.35277	0.487907	0.341718	0.559572	0.291144	0.216605	0.483095	0.627375	0.414163	0.283002	0.284687	0.485501	0.484546	2.21242	4.93823	3.6982	1.00436	3.21636	3.92296	1.10584	0.451877	1.43536	3.89112
1110020A21Rik	0.224585	0.274008	1.17924	0.465906	0.954145	0.371859	0.145107	0	0.53506	0.469029	0.298222	0.209558	0.58962	0.500483	0.711587	0.682612	0.372511	0.581719	0.205366	0.925568	1.13073	1.9175e-06	2.57887e-08	5.50714	2.36095
1110025L11Rik	0	0	0	0	0	0	0	0	0	0	0	0	0	0	0	0	0	0	0	0	0	NA	NA	0	0
1110028F11Rik	0	0	0	0	0	0	0	0	0	0	0	0	0	0	0	0	0	0	0	0	0	0	0.0467844	0	0.0525221
1110028F18Rik	0	0	0	0	0	0	0	0	0.0610882	0	0	0	0	0.0305441	0	0	0	0	0	0	0	0	0	0	0
1110032A03Rik	1.37743	1.85952	1.51393	3.25799	6.277	0.917745	3.40219	2.2736	1.98079	5.88429	1.14759	2.63085	1.89376	2.61939	6.08064	3.30457	8.36397	7.89795	3.02204	7.32484	11.146	9.37232	8.45023	26.8575	39.0148
1110032F04Rik	0	0	0	0	0	0	0	0	0	0	0	0	0	0	0	0	0	0	0	0	0	0	0.0985713	0	0
1110034G24Rik	1.3724	2.17555	2.37789	4.05761	5.44439	2.28598	2.37878	2.12371	2.19284	5.88682	1.82919	2.27717	2.2508	3.12522	5.66561	1.66777	2.42631	2.91238	0.973158	1.7607	2.34118	1.69408	1.47679	2.18508	2.03885
1110035M17Rik	NA	NA	NA	NA	NA	NA	NA	NA	NA	NA	NA	NA	NA	NA	NA	NA	NA	NA	NA	NA	NA	1.78485	0.700165	0.526024	0.788641
1110036E04Rik	0	0	0	0	0	0	0.0821745	0	0	0	0	0.0410872	0	0	0	0	0	0	0	0	0	0	0	0	0
1110037F02Rik	2.64209	5.27553	6.38119	4.90749	4.26162	4.05159	5.1724	4.12903	4.37232	3.75198	3.34684	5.22396	5.25511	4.6399	4.0068	11.3213	12.596	11.9269	10.9515	10.788	9.14701	3.57489	4.82698	2.23136	10.9041
1110038B12Rik	63.5014	78.3517	67.59	107.316	13.6555	114.94	201.695	168.083	128.009	28.6497	89.2207	140.023	117.837	117.662	21.1526	161.324	210.75	166.952	112.298	166.692	45.45	9.98069	9.68226	11.9769	8.7093
1110038F14Rik	21.5629	25.5611	22.3342	15.0484	12.1632	16.87	21.9789	19.1483	13.6247	9.03759	19.2164	23.77	20.7413	14.3366	10.6004	14.0239	20.1706	17.6145	9.61731	16.6282	9.68726	17.3338	20.9527	9.2051	10.4147
1110046J04Rik	4.55279	2.81221	0.17524	0	0.84875	10.9794	8.33386	2.2172	0.121202	0.648536	7.76609	5.57303	1.19622	0.060601	0.748643	5.94013	6.50602	4.67646	3.2927	1.29272	2.25896	0	1.01907	0.251398	2.03807
1110050K14Rik	NA	NA	NA	NA	NA	NA	NA	NA	NA	NA	NA	NA	NA	NA	NA	NA	NA	NA	NA	NA	NA	0	0	0	0.020122
1110051M20Rik	20.3769	35.668	14.6079	6.85996	4.7832	15.2754	40.9651	21.9183	4.93071	3.43034	17.8261	38.3165	18.2631	5.89534	4.10677	12.193	21.3284	20.5782	7.67887	12.906	6.32297	1.47843	3.03161	0.947707	3.74947
1110054M08Rik	14.5778	20.1096	15.0272	14.4292	33.0581	7.54771	26.7888	16.4636	12.7143	18.7316	11.0628	23.4492	15.7454	13.5717	25.8949	4.00833	8.69617	8.8992	2.13735	6.79055	11.1013	11.0783	3.94457	14.717	11.1407
1110057K04Rik	5.53102	8.02744	11.8712	16.2769	30.93	10.9675	12.475	10.1864	14.0353	25.2329	8.24926	10.2512	11.0288	15.1561	28.0815	20.2288	18.3411	13.5908	11.8285	18.5998	16.1003	2.63629	5.28702	7.44327	23.668
1110058L19Rik	3.5671	3.64813	4.14008	11.6858	7.06589	2.60598	6.40657	3.75255	6.89946	10.7374	3.08654	5.02735	3.94631	9.29263	8.90165	14.572	22.0779	19.5469	8.8511	20.6349	19.6123	17.2222	12.6044	14.6052	13.1419
1110059E24Rik	1.20752	4.35864	3.05813	2.65272	4.0461	3.9438	3.25106	2.01512	1.24843	2.54937	2.57566	3.80485	2.53662	1.95057	3.29773	22.1224	25.454	21.9036	13.2043	20.7009	18.3005	3.16608	5.25459	5.43986	9.33614
1110059G10Rik	0.275412	0.732338	0.954386	0.51428	0.672353	0.484234	0.716056	0.337396	0.506065	0.417896	0.379823	0.724197	0.645891	0.510173	0.545125	1.55467	2.04611	1.85381	1.12953	1.67702	1.53056	1.0961	0.96375	1.23224	1.90014
1110059M19Rik	NA	NA	NA	NA	NA	NA	NA	NA	NA	NA	NA	NA	NA	NA	NA	NA	NA	NA	NA	NA	NA	0.395108	4.77896	0.0774424	25.5916
1110065P20Rik	50.7101	64.6255	56.8397	68.6385	62.7537	64.9732	61.8178	55.5893	48.5168	60.3565	57.8417	63.2216	56.2145	58.5776	61.5551	22.0905	24.5153	26.9092	16.1405	36.0598	23.5995	23.3352	17.3397	21.6558	9.07318
1190002F15Rik	5.51861	4.233	4.10484	0.477048	0.233861	4.68125	0.996381	0.741299	0.551082	0.134174	5.09993	2.61469	2.42307	0.514065	0.184018	8.83363	16.8606	3.14191	1.23388	4.93136	2.10282	0	2.82474e-06	0	0.347376
1190002N15Rik	1.02128	5.17493	9.18885	9.58341	6.65802	2.21232	3.79684	6.12096	14.6307	7.15219	1.6168	4.48588	7.65491	12.1071	6.9051	6.04162	11.8495	17.6629	9.99975	20.9247	22.0837	6.40305	4.28005	1.91794	11.9578
1190003J15Rik	NA	NA	NA	NA	NA	NA	NA	NA	NA	NA	NA	NA	NA	NA	NA	NA	NA	NA	NA	NA	NA	0	0	0	0
1190003K10Rik	0	0	0	0	0	0	0	0	0	0	0	0	0	0	0	0	0	0	0	0	0	0	0	0.0392414	0
1190005I06Rik	11.9731	43.4449	17.0509	43.7282	52.8867	4.09795	27.4514	11.2097	23.4548	47.3807	8.03552	35.4481	14.1303	33.5915	50.1337	1.2859	2.86709	2.88235	1.19445	7.09777	17.8837	75.4789	23.132	70.4742	14.7849
1190007I07Rik	5.75686	1.9427	1.10432	11.6075	11.8034	4.47298	6.42618	5.39593	11.643	16.0035	5.11492	4.18444	3.25013	11.6252	13.9034	3.49755	4.16745	3.97683	1.04637	2.89452	5.48009	0.400906	5.01919e-07	21.0411	6.00457
1200011I18Rik	NA	NA	NA	NA	NA	NA	NA	NA	NA	NA	NA	NA	NA	NA	NA	NA	NA	NA	NA	NA	NA	2.24171	3.21398	2.38861	8.40598
1200014J11Rik	0.686444	2.0949	2.32918	1.17337	1.61677	1.7107	2.50975	2.26143	1.40743	1.07663	1.19857	2.30233	2.2953	1.2904	1.3467	4.83186	4.97288	5.10095	3.30713	4.76857	3.56487	1.80268	2.42564	1.42808	3.63647
1300001I01Rik	NA	NA	NA	NA	NA	NA	NA	NA	NA	NA	NA	NA	NA	NA	NA	NA	NA	NA	NA	NA	NA	85.2989	47.4702	NA	NA
1300002E11Rik	0.772501	2.57069	0.24372	1.06655	6.13924	4.15349	1.59569	1.86265	0.902461	4.88537	2.463	2.08319	1.05319	0.984506	5.5123	5.43494	6.64889	7.50374	3.41317	3.04733	6.30459	1.10763	0.558287	5.87033	10.4327
1300002K09Rik	NA	NA	NA	NA	NA	NA	NA	NA	NA	NA	NA	NA	NA	NA	NA	NA	NA	NA	NA	NA	NA	0	0.0687979	0.0206036	0.0514833
1300015D01Rik	NA	NA	NA	NA	NA	NA	NA	NA	NA	NA	NA	NA	NA	NA	NA	NA	NA	NA	NA	NA	NA	3.03907	1.28754	4.11306	9.47458
1300017J02Rik	0	0.0429361	0.0881707	0.0435523	0.0427042	0	0.1137	0.297758	0	0.0245007	0	0.0783181	0.192964	0.0217762	0.0336024	0	0.0667162	0.0417614	0.0321831	0.0803889	0.132899	0.115206	0.112983	0.118455	0
1300018J18Rik	NA	NA	NA	NA	NA	NA	NA	NA	NA	NA	NA	NA	NA	NA	NA	NA	NA	NA	NA	NA	NA	16.8074	7.07683	15.3407	7.51444
1500002O10Rik	NA	NA	NA	NA	NA	NA	NA	NA	NA	NA	NA	NA	NA	NA	NA	NA	NA	NA	NA	NA	NA	0	0	0	0.0639113
1500004A13Rik	0.165127	0.50951	0.546457	0.222051	0.136015	0.256435	0.354621	0.454201	0.0642676	0.161526	0.210781	0.432065	0.500329	0.143159	0.14877	1.04383	1.33346	1.33442	0.929427	1.06368	0.886646	0.557284	0.561804	0.57546	0.786244
1500009C09Rik	0	0	0	0	0	0	0	0	0	0	0	0	0	0	0	0	0	0	0	0	0	0	0	0.0262198	0
1500009L16Rik	0.61472	7.99327	2.48983	0.637707	0.357308	0.162528	5.70799	1.24568	0	0.204999	0.388624	6.85063	1.86776	0.318854	0.281154	0	0	0	0	0	0	0	0.826612	0.24778	0.530692
1500011B03Rik	7.32655	11.722	7.977	7.86954	5.57237	9.19504	10.1444	7.97553	4.59977	5.29758	8.26079	10.9332	7.97626	6.23466	5.43497	11.8064	13.223	9.90499	9.10493	10.4896	10.2882	0.977708	0.735487	2.2613	4.47044
1500011K16Rik	1.72141	2.34735	0.903817	3.27393	4.81525	3.31864	3.26343	1.38738	2.40667	5.94391	2.52002	2.80539	1.1456	2.8403	5.37958	4.72361	3.64743	3.23443	2.41927	3.84556	4.49059	52.4742	37.9699	29.0265	20.5165
1500012F01Rik	7.65099	13.4853	17.2651	16.0431	2.81496	26.3619	20.2801	22.6713	17.687	6.74512	17.0064	16.8827	19.9682	16.8651	4.78004	69.8757	92.9353	99.1004	58.1521	162.338	26.6246	12.7343	16.1406	19.5535	9.50954
1500012K07Rik	0	0	0	0	0	0	0	0	0	0	0	0	0	0	0	0	0	0	0	0	0	0	0	0	0.10755
1500015A07Rik	0.157128	0.964182	0.439996	0.271673	0.639317	0.290805	0.680872	0.439014	0.418434	0.33623	0.223967	0.822527	0.439505	0.345054	0.487774	3.36719	4.09923	3.71649	3.3325	3.22936	2.11856	0.143706	0.77513	1.24558	0.659407
1500015L24Rik	0	0	0	0	0	0	0	0	0	0	0	0	0	0	0	0.178103	0	0	0.058048	0	0	0	0	0.0610444	0
1500015O10Rik	0.254191	67.9159	64.5956	6.06502	2.32705	0.705667	12.1162	12.6198	0.710761	0.741724	0.479929	40.016	38.6077	3.38789	1.53439	0.0498222	0.807895	2.23354	2.19216	0.194693	0.625849	0	0.51242	0.0512294	0.704052
1500016L03Rik	NA	NA	NA	NA	NA	NA	NA	NA	NA	NA	NA	NA	NA	NA	NA	NA	NA	NA	NA	NA	NA	0	0	0	0
1500017E21Rik	1.22e-07	1.9e-07	8.69e-06	1.46e-07	0.0600814	2.65e-06	0.000205396	8.31e-08	2.55e-06	1.18e-07	1.38379e-06	0.000102793	4.38674e-06	1.34631e-06	0.0300408	1.81527e-204	0.0367286	0.0340719	4.8886e-77	0.0547611	0.589967	0.0970779	0.281468	0.144008	2.69687
1500032L24Rik	NA	NA	NA	NA	NA	NA	NA	NA	NA	NA	NA	NA	NA	NA	NA	NA	NA	NA	NA	NA	NA	259.097	172.97	199.176	78.353
1600002D24Rik	0	0	0	0	0	0	0	0	0	0	0	0	0	0	0	0	0	0	0	0	0	0	0	0.042479	0.0265361
1600002H07Rik	5.73955	7.42912	5.46201	2.88405	1.642	7.84238	2.50165	3.78741	2.07774	1.09908	6.79096	4.96539	4.62471	2.48089	1.37054	9.39523	5.16618	4.21509	3.43738	4.20965	5.14552	1.59956	2.17204	2.01074	1.98716
1600002K03Rik	12.0565	15.3136	6.12603	11.297	6.72532	17.9949	11.6917	5.89293	8.69989	6.24174	15.0257	13.5026	6.00948	9.99845	6.48353	9.75738	6.87583	5.41623	3.80129	3.57463	2.9411	4.79195	3.91623	4.23266	5.28818
1600010M07Rik	0	0	0	0.218863	0	0	0	0	0	0	0	0	0	0.109432	0	0.248109	0	0	0.0808647	0	0.0247354	0	0.283185	0.085039	0.956211
1600012H06Rik	4.01716	4.28331	5.3974	3.20691	2.62994	6.5582	6.17097	6.62115	3.01958	3.60594	5.28768	5.22714	6.00927	3.11325	3.11794	17.8052	21.1947	21.2663	17.8447	18.0764	14.5346	0.661254	1.93898	4.74522	13.5563
1600014C10Rik	6.54894	7.95485	8.59647	12.9367	47.8995	4.15933	10.4796	12.3383	13.2545	37.125	5.35414	9.21722	10.4674	13.0956	42.5123	4.39688	7.24221	7.94435	5.49587	7.17747	30.7716	10.4658	14.6799	16.2241	38.3881
1600014C23Rik	0	0	0	0	1.12619	0	0.149924	0	0	0.323066	0	0.074962	0	0	0.724628	0	0	0	0	0.106001	0	0	0	0.111568	0
1600014K23Rik	0	0	0	0	0.278071	0	0	0	0	0	0	0	0	0	0.139036	0	0	0	0	0	0	0	0	0	0
1600015I10Rik	0	0	0	0	0	0	0	0	0	0	0	0	0	0	0	0	0	0	0	0	0	0	0.205265	0.153711	0.0576127
1600016N20Rik	NA	NA	NA	NA	NA	NA	NA	NA	NA	NA	NA	NA	NA	NA	NA	NA	NA	NA	NA	NA	NA	0.0647237	0	0.0380309	0
1600019K03Rik	0	0	0	0	0	0	0	0	0	0	0	0	0	0	0	0.623949	0	0	0.122016	0	0	0	0	0	0
1600020E01Rik	2.45875	4.45637	4.27156	2.61701	3.0326	2.33445	4.96885	2.01427	1.42166	2.81063	2.3966	4.71261	3.14291	2.01933	2.92162	7.89793	9.64836	13.4514	9.08426	11.6243	9.61957	7.53132	0.000200308	10.2772	5.08169
1600023N17Rik	0	0.110586	0.113546	0	0	0	0	0.139437	0	0	0	0.055293	0.126492	0	0	0.127162	0.300709	0.179267	0.0828903	0.0828196	0.114098	0	0	0.174338	0.108907
1600025M17Rik	0	0	0	0	0	0	0	0	0	0	0	0	0	0	0	0.0993332	0.503357	0	0.0971252	0.582254	0.534767	0	0	0	0
1600027J07Rik	0	0	0	0	0	0.282184	0	0	0	0	0.141092	0	0	0	0	0.358615	0.121149	0.707781	0.233762	0.700688	0.107257	NA	NA	NA	NA
1600029D21Rik	NA	NA	NA	NA	NA	NA	NA	NA	NA	NA	NA	NA	NA	NA	NA	NA	NA	NA	NA	NA	NA	0.0726398	0	0.301538	0.3636
1600029I14Rik	0	0	0	0	0	0	0	0	0	0	0	0	0	0	0	0	0	0	0	0	0	0	0.177005	3.88501e-05	0.0663317
1600029O15Rik	0	0.00821885	0.0189614	0	0	0.0170892	0.0586835	0.0116425	0.00360643	0	0.0085446	0.0334512	0.0153019	0.00180321	0	0.026544	0.0251082	0.0533427	0.0276842	0.0338348	0.0455923	0.135621	0.233299	0.0249542	0.16368
1700001C02Rik	0	0	0	0	0	0	0	0	0	0	0	0	0	0	0	0	0	0	0	0	0	0	0	0	0
1700001C19Rik	0	0	0	0	0	0	0	0	0	0	0	0	0	0	0	0	0	0	0	0	0	0	1.27837e-05	0	0.115622
1700001D01Rik	0	0	0	0	0	0	0	0	0	0	0	0	0	0	0	0.0943822	0	0	0.0922843	0	0	0	0	0.097048	0
1700001F09Rik	0	0	0	0	0	0	0	0	0	0	0	0	0	0	0	0.0100378	0.0169551	0	0.0261725	0.0956114	0.159866	0	0	0	0
1700001G11Rik	0.154754	0.473113	7.51e-10	0.642892	0.469508	0.142499	0.585098	0.199733	0.495982	0.180167	0.148626	0.529106	0.0998665	0.569437	0.324838	0.665184	0.73463	0.511403	0.413589	1.23941	0.650472	1.0213	0.934048	0.248721	0.310687
1700001G17Rik	0.63455	0.259586	0	0.789935	0.258184	0.822077	0.137483	0.32731	0.101389	0	0.728313	0.198535	0.163655	0.445662	0.129092	2.08948	0.605037	0.673291	0.340505	0.486021	0.446382	0.347827	0.511674	0.204618	0.191734
1700001J03Rik	0	0	0	0	0	0	0	0	0	0	0	0	0	0	0	0	0.0601674	0.150649	0	0	0.0799023	1.03731	0	3.01734	0.30507
1700001J11Rik	0.0384037	0.0589142	0.0403274	0.159359	0	0.017769	0.0728055	0.049523	0.0153405	0.0560306	0.0280863	0.0658598	0.0449252	0.0873498	0.0280153	0.205745	0.211059	0.210109	0.149652	0.176487	0.234135	0.518173	0.404817	0.0619188	0.319109
1700001K19Rik	0	0.237093	0	0	0.117906	0	0.12557	0.0747371	0.0926037	0	0	0.181332	0.0373686	0.0463018	0.058953	0	0	0.0384344	0	0	0.0407703	1.11209	0.623216	0.0467221	0.17512
1700001K23Rik	0	0	0	0	0	0	0	0	0	0	0	0	0	0	0	0	0	0	0	0	0	0	0	0	0
1700001L05Rik	0.0299877	0.0536706	0.0787246	0.202209	0.0305033	0.0693748	0.105579	0.087008	0.071872	0.0612525	0.0496813	0.0796248	0.0828663	0.137041	0.0458779	0.0999206	0.166792	0.159093	0.258616	0.120585	0.116024	0.144066	0.201837	0.102743	0.487029
1700001L19Rik	0	0	0	0	0	0	0	0	0	0	0	0	0	0	0	0.0212484	0	0	0	0.0207584	0	0	0	0	0
1700001O22Rik	0.115427	0.236124	0	0	0.352285	0.106814	0.250126	0	0.36892	0.202117	0.11112	0.243125	0	0.18446	0.277201	3.07895	9.62102	12.3695	5.78965	5.9449	6.5354	0.192946	0.247049	0.602894	0.232551
1700001P01Rik	0	0.211658	0	0	0	0	0	0	0.165339	0	0	0.105829	0	0.0826695	0	0.243385	0.246664	0.343113	0.396625	0.713315	0.145586	0.566551	1.38905	0.166839	0
1700003C15Rik	0	0	0	0	0	0	0	0	0	0	0	0	0	0	0	0	0	0	0	0	0	0.235729	0	0	0
1700003D09Rik	0	0.241422	0.577601	2.98e-08	0.0817544	0	0.0424568	0.148619	3.23e-08	4.36e-08	0	0.141939	0.36311	3.10563e-08	0.0408772	0	0	0	0	2.80196e-08	0	0	0	0.029573	6.30854e-08
1700003E16Rik	9.37271	6.64731	3.9072	1.75897	0.526997	2.39714	6.93911	2.52054	0.263394	0.384815	5.88492	6.79321	3.21387	1.01118	0.455906	0.590819	2.41383	2.45188	0.397159	0.757566	0.944274	0.710805	0.0633717	0.265784	0.237189
1700003F12Rik	5.09408	2.35281	0	0.34094	3.34301	1.36856	7.0316	2.11903	0	2.20569	3.23132	4.69221	1.05951	0.17047	2.77435	0.128833	0.652843	0.16346	0.125969	0.125862	0.577983	0.225063	0.662161	0.264943	0.0827534
1700003F17Rik	NA	NA	NA	NA	NA	NA	NA	NA	NA	NA	NA	NA	NA	NA	NA	NA	NA	NA	NA	NA	NA	23.4787	11.5744	0.383061	1.10503
1700003G13Rik	0	0	0	0	0	0	0	0	0	0	0	0	0	0	0	0	0	0	0	0	0	0	0	0	0
1700003G18Rik	0.208946	0	0	0	0	0.386708	0	0	0	0	0.297827	0	0	0	0	0	0.0830116	0	0	0	0.0734929	0	0	0	0.105224
1700003H04Rik	0	0	0	0	0	0	0	0	0	0	0	0	0	0	0	0	0	0	0	0	0	0	0	0	0
1700003I22Rik	0	0	0	0	0	0	0	0	0	0	0	0	0	0	0	0	0	0	0	0	0	NA	NA	NA	NA
1700003L19Rik	0	0	0	0	0	0	0	0	0	0	0	0	0	0	0	0	0	0	0	0	0	0	0	0	0
1700003M02Rik	0	0	0	0	0	0.0532112	0.124585	0.0370755	0	0	0.0266056	0.0622925	0.0185377	0	0	0.0225412	0.0228449	0	0	0	0	0	0	0.0231779	0
1700003M07Rik	0.0977962	0.149849	0.0513455	0	0	0	0.360558	0.0630558	0	0	0.0488981	0.255204	0.0572006	0	0	0.354563	1.87931	0.956973	0.322768	0.0561796	0.0515977	0	0	0	0.0885452
1700003P14Rik	0	0	0	0	0	0	0	0	0	0	0	0	0	0	0	0	0	0	0	0	0	0	0	0	0
1700006A11Rik	0	0	0	0	0	0	0	0	0	0	0	0	0	0	0	0	0	0	0	0	0	0	0	0	0
1700006E09Rik	0	0	0	0	0	0	0	0	0	0	0	0	0	0	0	0	0	0	0	0	0	0	0	0.141855	0
1700006F04Rik	0	0	0	0	0	0	0	0	0	0	0	0	0	0	0	0	0	0	0	0	0	0	0	0	0
1700006H21Rik	0	0	0	0	0	0	0	0	0	0	0	0	0	0	0	0.0815163	0.0826146	0	0.0797044	0	0	0	0	0	0
1700007B14Rik	0	0	0	0	0	0	0	0	0	0	0	0	0	0	0	0	0	0	0	0	0	0	0	0	0.0238054
1700007F19Rik	0	0	0	0	0	0	0	0	0	0	0	0	0	0	0	0.0237011	0	0	0	0	0	0	0	0	0
1700007G11Rik	0	0	0	0	0	0	0	0	0	0.0772199	0	0	0	0	0.0386099	0	0.157704	0	0	0	0	0	0	0	0
1700007J10Rik	0.0131593	0.145544	0.171052	0.423452	0.148233	1.43e-184	0.150131	0.190944	0.356208	0.163748	0.00657965	0.147838	0.180998	0.38983	0.155991	0.19953	0.421278	0.610451	1.30317	0.319872	0.34532	0.190978	4.01528e-195	0.0221738	0.300163
1700007K09Rik	0	0	0	0	0	0	0	0	0.294258	0	0	0	0	0.147129	0	0	0	0.0610647	0.282354	0	0.259104	0	0.247295	0.0742322	0.0927439
1700007K13Rik	1.73862	3.25987	0.608568	0.150303	0.736878	0.268146	3.37453	0.280251	0.231498	0.0845541	1.00338	3.3172	0.44441	0.190901	0.410716	0.283978	1.95707	0.576488	0.0555332	0	0.0509605	0.198493	0.194663	0.0583998	0.0729633
1700007L15Rik	0.640358	2.45589	0.840543	5.14836	0.977051	1.33329	1.21399	1.23865	4.34848	1.49484	0.986824	1.83494	1.0396	4.74842	1.23595	1.44339	1.78084	1.00856	0.859055	1.47141	1.23879	1.09638	1.50531	0.903399	2.09613
1700007P06Rik	0	0	0	0	0	0	0.152138	0	0	0	0	0.076069	0	0	0	0.0550527	0	0.0465664	0	0	0	0	0	0	0.0707242
1700008A04Rik	NA	NA	NA	NA	NA	NA	NA	NA	NA	NA	NA	NA	NA	NA	NA	NA	NA	NA	NA	NA	NA	0	0	0	0
1700008C04Rik	0	0	0	0	0	0	0	0	0	0	0	0	0	0	0	0	0	0.00968886	0	0	0	NA	NA	NA	NA
1700008F21Rik	0	0	0	0	0	0	0	0	0	0	0	0	0	0	0	0	0	0.0853857	0.0394806	0.0591708	0	0	0	0.0415186	0
1700008I05Rik	0	0	0	0	0	0	0	0	0	0	0	0	0	0	0	0.195128	0.285649	0.385116	0.105995	0.169447	0.252895	0	0	0	0
1700008J07Rik	1.83414	2.15518	1.72112	1.94321	2.18323	1.04725	2.02922	2.21422	2.05766	2.36853	1.4407	2.0922	1.96767	2.00043	2.27588	1.97341	1.78294	1.73391	0.897461	2.18196	1.61967	3.96244	2.7832	2.76844	2.3976
1700008K24Rik	0	0	0	0	0	0	0	0	0	0	0	0	0	0	0	0	0	0	0	0	0	0	0	0	0
1700008O03Rik	0	0	0.129121	0.12756	0.125076	0.113786	0.532823	0.0792817	0	0	0.056893	0.266412	0.104201	0.06378	0.062538	0	0.293107	0.163086	0	0.18836	0.0432495	0.337026	0.165261	0.198253	0
1700008P02Rik	0	0	0	0	0	0	0	0	0	0	0	0	0	0	0	0	0	0	0	0	0	0	0	0	0
1700008P20Rik	NA	NA	NA	NA	NA	NA	NA	NA	NA	NA	NA	NA	NA	NA	NA	NA	NA	NA	NA	NA	NA	0.174677	0	NA	NA
1700009C05Rik	0	0	0	0	0	0	0	0	0	0	0	0	0	0	0	0	0	0	0	0	0	0	0	0	0
1700009J07Rik	0	0	0	0	0	0	0	0	0	0	0	0	0	0	0	0	0	0	0	0	0	0	0	0	0.0616614
1700009N14Rik	0.164347	0	0	0	0	2.88958	0	0	0	0	1.52696	0	0	0	0	1.61063	0.261172	0.0544941	0	0	0	0	0	0	0.0413823
1700009P17Rik	NA	NA	NA	NA	NA	NA	NA	NA	NA	NA	NA	NA	NA	NA	NA	NA	NA	NA	NA	NA	NA	1.86658	1.68975	4.39083	4.53633
1700010B08Rik	0	0	0	0	0	0	0	0	0	0	0	0	0	0	0	0	0.0499098	0.0416551	0	0	0.0883736	0	0	0	0
1700010D01Rik	0	0	0	0	0	0	0	0	0	0	0	0	0	0	0	0	0	0	0	0	0	0	0	0	0
1700010I02Rik	0	0	0	0	0	0	0	0	0	0	0	0	0	0	0	0	0	0.0124196	0.0287131	0	0	0	0	0	0
1700010I14Rik	0	0	0	0	0	0	0	0	0	0	0	0	0	0	0	0.956919	1.21742	1.48105	0.418056	1.21332	0.931678	0.0712524	0.0698775	0.020935	0.313869
1700010J16Rik	0	0	0	0	0	0	0	0	0.101686	0	0	0	0	0.050843	0	0	0	0	0	0	0	0	0	0	0
1700010K23Rik	0	0	0	0	0	0	0	0	0	0	0	0	0	0	0	0	0	0	0	0.193136	0	0	0.366382	0	0
1700011A15Rik	0	0	0	0	0	0	0	0	0	0	0	0	0	0	0	0.487533	0	0	0.0476696	0	0.0874888	0	0	0	0
1700011B04Rik	0	0	0	0	0	0	0	0	0	0	0	0	0	0	0	0	0	0	0	0	0	0	0	0	0
1700011C11Rik	0	0	0	0	0	0	0	0	0	0	0	0	0	0	0	0	0	0	0	0	0	NA	NA	NA	NA
1700011E24Rik	0	0	0	0	0	0	0	0	0	0	0	0	0	0	0	0.0529983	0	0	0	0	0.0475533	0	0	0	0
1700011H14Rik	0	0	0	0	0	0	0	0	0	0.263432	0	0	0	0	0.131716	0	0	0	0	0	0	0	0	0.109168	0
1700011I03Rik	0	0	0	0	0	0	0	0	0	0	0	0	0	0	0	0	0.0452664	0	0	0	0	0	0	0	0
1700011J10Rik	NA	NA	NA	NA	NA	NA	NA	NA	NA	NA	NA	NA	NA	NA	NA	NA	NA	NA	NA	NA	NA	2.19833	3.661	2.12207	2.58635
1700011L22Rik	0	0	0	0	0.114251	0	0	0	0.179466	0	0	0	0	0.089733	0.0571255	0	0	0	0	0	0	0	0	0.0905472	0
1700011M02Rik	0	0	0	0	0	0	0	0	0	0	0	0	0	0	0	0	0	0	0	0	0	0	0	0	0
1700012A03Rik	0	0	0	0	0	0	0	0	0	0	0	0	0	0	0	0	0	0	0	0	0	0	0	0	0
1700012B07Rik	0	0	0	0	0	0	0	0	0	0	0	0	0	0	0	0	0.0469897	0	0	0	0	0	0	0	0
1700012B09Rik	0	0	0	0	0	0	0	0	0	0	0	0	0	0	0	0.0708427	0	0	0	0	0	0	0	0	0
1700012B15Rik	NA	NA	NA	NA	NA	NA	NA	NA	NA	NA	NA	NA	NA	NA	NA	NA	NA	NA	NA	NA	NA	9.60048	6.99417	4.15348	3.7282
1700012D01Rik	1.41631	1.99167	3.53224	1.83659	1.44066	0.982967	0.575365	0.684894	0.707187	1.34315	1.19964	1.28352	2.10857	1.27189	1.3919	0.624603	0.633018	0.880536	0.407146	1.1526	1.6813	0.727294	0.237753	0.570884	0.802405
1700012D14Rik	0.613569	0.418338	0.429535	0.636513	0	0	0	0	0.163394	0.238717	0.306785	0.209169	0.214768	0.399954	0.119359	0.160348	0.243763	0.610339	0.0783921	0.548276	0.647434	1.11982	0.274552	1.0717	0.720978
1700012D16Rik	0	0	0	0	0	0	0	0	0	0	0	0	0	0	0	0	0	0	0	0	0	NA	NA	NA	NA
1700012I11Rik	0	0	0	0	0	0	0	0	0	0	0	0	0	0	0	0	0.0413638	0	0	0	0	0	0	0	0
1700012L04Rik	0	0	0	0	0	0	0	0	0	0	0	0	0	0	0	0.0117931	0.0635629	0	0	0	0.0476167	0	0	0.13642	0
1700012P22Rik	0	0	0	0	0	0	0	0	0	0	0	0	0	0	0	0	0	0	0	0	0	0	0	0	0.114011
1700013D24Rik	0	0	0	0	0	0	0	0.169816	0	0	0	0	0.084908	0	0	0	0	0	0	0	0	0	0	0	0
1700013F07Rik	0	0	0	0	0	0	0.485364	0.14444	0	0	0	0.242682	0.07222	0	0	0.0878168	0.445	0.14856	0	0	0	0	0	0.0902972	0
1700013G23Rik	NA	NA	NA	NA	NA	NA	NA	NA	NA	NA	NA	NA	NA	NA	NA	NA	NA	NA	NA	NA	NA	0	1.79331	0.754553	0.808045
1700013G24Rik	0	0	0	0	0	0.0966936	0	0	0	0	0.0483468	0	0	0	0	0	0.0830259	0.103941	0.0801012	0.0400164	0	0	0	0	0
1700013H16Rik	0	0	0	0	0	0	0	0	0	0	0	0	0	0	0	0	0	0	0.0653396	0	0	0	0	0	0.0429238
1700015E13Rik	0	0	0	0	0	0	0	0	0	0	0	0	0	0	0	0	0	0	0	0	0	0	0	0.275351	0.516025
1700015F17Rik	0	0	0	0	0	0	0	0	0	0	0	0	0	0	0	0.0673436	0.136502	0	0	0	0	0	0	0	0.0865139
1700015G11Rik	0	0	0	0	0	0	0	0	0	0	0	0	0	0	0	0	0	0	0	0	0	0	0	0	0
1700016C15Rik	0	0	0	0	0	0	0	0	0	0	0	0	0	0	0	0.250103	0	0	0	0	0	0	0	0.128584	0
1700016D06Rik	0	0	0	0	0	0	0	0	0	0	0	0	0	0	0	0.0643643	0	0	0	0	0	0	0.110404	0	0
1700016G22Rik	0	0	0	0	0	0	0	0	0	0	0	0	0	0	0	0	0	0	0	0.0855711	0	0	0	0	0
1700016H13Rik	0	0	0	0	0	0	0	0	0	0	0	0	0	0	0	0	0	0	0	0	0	0	0	0	0
1700016K19Rik	0	0	0	0	0	0.112199	0	0	0	0	0.0560995	0	0	0	0	0	0	0	0	0	0	0	0	0	0
1700016L04Rik	0	0	0	0.127741	0	0	0	0	0	0	0	0	0	0.0638705	0	0	0	0.0408292	0	0	0.0433107	0	0	0	0
1700016L21Rik	0	0	0	0	0	0	0	0	0	0	0	0	0	0	0	0	0	0	0	0	0	0	0	0	0
1700016M24Rik	NA	NA	NA	NA	NA	NA	NA	NA	NA	NA	NA	NA	NA	NA	NA	NA	NA	NA	NA	NA	NA	0	0	NA	NA
1700016P04Rik	0	0	0	0	0	0	0	0	0	0	0	0	0	0	0	0	0	0	0	0	0	0	0	0	0
1700017B05Rik	80.1474	45.9472	204.807	118.614	27.8794	32.5244	50.5912	148.605	93.1228	27.8818	56.3359	48.2692	176.706	105.868	27.8806	13.4753	17.8488	18.8586	37.4839	41.1196	26.6968	4.39016	6.11176	2.86009	4.23059
1700017D01Rik	0	0	0	0	0	0	0	0	0	0	0	0	0	0	0	0	0	0	0	0	0	0	0	0	0
1700017G19Rik	0	0	0	0	0	0	0	0	0	0	0	0	0	0	0	0	0	0	0	0	0	0	0	0	0
1700017J07Rik	0	0	0	0	0	0	0	0	0	0	0	0	0	0	0	0	0	0	0	0	0	0	0	0	0
1700017N19Rik	0	0	0	0	0	0	0	0	0	0	0	0	0	0	0	0	0	0	0	0	0	0	0	0	0
1700018A04Rik	0.511336	0.348634	0.178983	0.353638	0	0	0.553935	0.549488	0	0	0.255668	0.451284	0.364235	0.176819	0	0.334078	0.135431	0.0565161	0.0653304	0.130549	1.49877	0	0	0	0
1700018B08Rik	0	0	0	0	0	0.0918376	0	0	0	0	0.0459188	0	0	0	0	0	0	0	0	0	0	0.136055	0	0.0800057	0
1700018B24Rik	0	0	0	0	0	0	0	0	0	0	0	0	0	0	0	0	0	0	0	0	0	0.113068	0	0.0221394	0
1700018C11Rik	0	0	0	0	0	0	0	0	0	0	0	0	0	0	0	0	0.0739489	0.123437	0	0	0	0	0	0	0
1700018F24Rik	0	0	0	0	0	0	0	0	0	0.0277249	0	0	0	0	0.0138625	0.018623	0	0.0157523	0	0	0	0.0651327	0	0	0
1700018G05Rik	0	0	0	0	0	0	0	0	0	0	0	0	0	0	0	0	0	0	0	0	0	0	0	0	0
1700018L02Rik	0.883813	1.49143	1.58039	1.62593	2.60973	0.41556	2.23995	1.50428	1.61714	2.64218	0.649686	1.86569	1.54234	1.62153	2.62595	1.12333	1.1157	1.32855	0.793581	1.39286	2.50053	5.20942	2.32808	2.43884	3.03712
1700019A02Rik	0	0	0	0	0	0	0	0	0	0	0	0	0	0	0	0	0	0	0	0	0	0	0	0	0
1700019B03Rik	0	0.0631069	0	0	0	0.114201	0.033423	0.119357	0	0	0.0571005	0.048265	0.0596785	0	0	0	0.0245147	0.0613805	0.0473023	0	0.0868147	0.0846398	0.0830066	0.049744	0.0310745
1700019B21Rik	0	0	0	0	0	0	0	0	0	0	0	0	0	0	0	0.174731	0.0885437	0	0	0	0	0	0	0	0
1700019C18Rik	0	0	0	0	0	0	0	0	0	0	0	0	0	0	0	0	0	0	0	0	0	NA	NA	NA	NA
1700019D03Rik	0	0	0	0	0	0	0	0	0.110239	0	0	0	0	0.0551195	0	0	0	0	0	0	0	0	1.66873	0.0556195	1.80673
1700019E08Rik	0	0	0	0	0	0	0	0	0	0	0	0	0	0	0	0	0	0	0	0	0	0	0	0	0.101564
1700019G17Rik	0.236096	1.42672	0.827178	0.612849	0.354398	0.0981206	0.856989	0.664142	0.738526	0.33593	0.167108	1.14185	0.74566	0.675687	0.345164	0.397843	1.28494	2.24404	0.479961	2.79376	1.67311	0.215008	0.10193	0.386044	0.32924
1700019G24Rik	0	0	0	0	0	0	0.15137	0	0	0	0	0.075685	0	0	0	0	0.111025	0	0	0	0	0	0	0	0
1700019L03Rik	3.53754	1.0447	2.35367	1.05622	0.601209	6.2169	1.50825	2.92628	0.854463	0.514956	4.87722	1.27648	2.63998	0.955341	0.558083	2.6637	1.66924	1.19825	2.63875	0.99163	0.485183	0.0862672	0.159023	0.146877	0.377919
1700019M22Rik	0	0	0	0	0	0	0	0	0	0	0	0	0	0	0	0	0	0	0	0	0	0	0	0	0
1700019N12Rik	NA	NA	NA	NA	NA	NA	NA	NA	NA	NA	NA	NA	NA	NA	NA	NA	NA	NA	NA	NA	NA	0.619159	0	NA	NA
1700019N19Rik	0	0	0	0	0	0	0	0	0	0	0	0	0	0	0	0	0	0	0.0463438	0	0	0	0	0	0
1700019O17Rik	0	0	0	0	0	0	0	0	0	0	0	0	0	0	0	0	0	0	0	0	0	0	0	0	0
1700020A23Rik	0.349103	0	0.569732	0	0	0	0	0	0	0	0.174551	0	0.284866	0	0	0	0	0.0897756	0.602138	0.103688	0	0	0.363111	0.109134	0
1700020D05Rik	0	0	0	0	0.217008	0	0.173335	0.206333	0	0	0	0.0866675	0.103166	0	0.108504	0.209077	0.381408	0.636653	0.408859	0.204255	0.600308	0.731105	0.1434	0.0859928	0.429749
1700020G17Rik	0	0	0	0	0	0	0	0	0	0	0	0	0	0	0	0	0.0850555	0	0	0	0	0	0	0	0
1700020I14Rik	1.61603	3.33034	6.12928	3.3752	10.1349	1.57579	3.08807	2.83415	3.56345	6.94417	1.59591	3.2092	4.48172	3.46932	8.53954	9.2011	12.296	12.785	11.2952	14.0838	24.876	11.7062	8.4724	19.3096	20.2133
1700020L24Rik	5.26151	10.762	20.719	29.8964	10.8256	0.553281	15.6746	29.2984	20.253	9.0722	2.9074	13.2183	25.0087	25.0747	9.9489	3.28131	11.3543	12.688	26.1712	16.9441	13.5854	13.6025	14.3044	8.09758	18.4273
1700020M21Rik	0	0	0	0	0	0	0	0	0	0	0	0	0	0	0	0	0	0	0	0	0	0	0	0	0
1700020N01Rik	0	0	0	0	0	0	0	0	0	0	0	0	0	0	0	0	0	0	0	0	0.107043	0.139067	0	0	0
1700020N15Rik	0	0	0	0	0	0	0.0688275	0	0	0	0	0.0344137	0	0	0	0	0	0	0	0	0	0	0	0	0
1700020N18Rik	0	0	0	0	0	0	0	0	0	0	0	0	0	0	0	0	0	0	0	0	0	0	0	0	0
1700021F05Rik	5.88744	10.2488	12.8908	40.0242	50.3302	9.73702	11.9416	7.75359	32.4241	36.9174	7.81223	11.0952	10.3222	36.2242	43.6238	20.2801	17.9158	16.6556	13.4436	23.3623	40.5347	35.0192	13.8047	45.0383	19.3664
1700021F07Rik	0	0	0	0	0	0	0	0	0	0	0	0	0	0	0	0	0	0	0	0	0	0	0	0	0
1700021K19Rik	24.4	23.6476	12.6363	9.20775	7.04911	23.44	16.1426	12.4692	8.16822	7.54074	23.92	19.8951	12.5527	8.68798	7.29493	8.8886	8.64611	8.73291	3.44783	5.54974	5.67347	0.000299629	0.000109763	2.8756	7.76204
1700021N21Rik	0	0	0	0	0	0	0	0	0	0	0	0	0	0	0	0	0	0	0	0	0	0	0	0	0.124906
1700022A21Rik	0	0	0	0	0	0	0	0	0	0	0	0	0	0	0	0	0	0	0	0	0	0	0	0	0
1700022A22Rik	0	0	0	0	0	0	0	0	0	0	0	0	0	0	0	0	0	0	0	0	0	0	0	0	0
1700022E09Rik	0	0	0	0	0	0	0	0	0	0	0	0	0	0	0	0	0	0	0	0	0	0	0	0	0
1700022H01Rik	0	0	0	0	0.184208	0	0.196182	0	1.01274	0.211373	0	0.098091	0	0.50637	0.197791	0	0	0	0	0	0.0636968	NA	NA	NA	NA
1700022H16Rik	0	0	0	0	0	0	0	0	0	0	0	0	0	0	0	0	0	0	0	0	0	0	0	0	0
1700022I11Rik	0	0.0504958	0	0	0	0	0	0.0159174	0.0394453	0	0	0.0252479	0.0079587	0.0197227	0	0.0290325	0.0196157	0.00818573	0.0378495	0.0378172	0.0173665	0.0338812	0	0	0.0124323
1700022P22Rik	NA	NA	NA	NA	NA	NA	NA	NA	NA	NA	NA	NA	NA	NA	NA	NA	NA	NA	NA	NA	NA	0	0	0.781812	0.586066
1700023A16Rik	NA	NA	NA	NA	NA	NA	NA	NA	NA	NA	NA	NA	NA	NA	NA	NA	NA	NA	NA	NA	NA	0	0	0	0.123447
1700023C21Rik	0	0	0	0	0	0	0	0	0	0	0	0	0	0	0	0	0	0	0	0	0	0	0	0	0
1700023E05Rik	0	0	0	0	0	0	0	0	0	0	0	0	0	0	0	0	0	0	0	0	0	0	0	0	0
1700023F02Rik	0	0	0	0	0	0	0	0	0	0	0	0	0	0	0	0	0	0	0	0	0	0	0	0	0
1700023F06Rik	0	1.07233	0	0	0	0	1.18319	0.338023	0	0	0	1.12776	0.169012	0	0	0	0.31242	0.840188	0.133962	0.200772	0.122931	0	0	0.0379611	0.0948618
1700023L04Rik	0	0	0	0.794253	0.389267	0	0	0	0.458697	0.446814	0	0	0	0.626475	0.41804	0	0.152037	0.126871	0.0732858	0.513179	10.5537	0.00345528	1.52898	0	7.55067
1700024B18Rik	0	0	0	0	0	0	0	0	0	0	0	0	0	0	0	0	0	0.131558	0	0	0	0	0	0	0
1700024F13Rik	0	0	0	0	0	0.172985	0.101254	0.12053	0	0	0.0864925	0.050627	0.060265	0	0	0.0732796	0.0742669	0.123967	0	0.0715896	0.0657509	0	0	0	0
1700024G13Rik	0	0	0	0	0	0	0	0	0	0	0	0	0	0	0	0	0	0	0	0	0	0	0	0	0
1700024I08Rik	0	0	0	0	0	0	0	0	0	0	0	0	0	0	0	0	0	0	0	0	0	NA	NA	NA	NA
1700024N05Rik	0	0	0	0	0	0	0	0	0	0	0	0	0	0	0	0	0	0	0	0	0	NA	NA	NA	NA
1700024P03Rik	NA	NA	NA	NA	NA	NA	NA	NA	NA	NA	NA	NA	NA	NA	NA	NA	NA	NA	NA	NA	NA	0	0	0	0
1700024P04Rik	0	0	0	0	0	0	0	0	0	0	0	0	0	0	0	0	0	0	0	0	0	0	0.428186	0	0
1700024P16Rik	0.242772	0	0	0	0	1.23486	0	0	0	0	0.738816	0	0	0	0	0.011892	0	0.0100588	0.0116276	0	0	0	0.199552	0.0119531	0.373348
1700025B11Rik	0	0	0	0	0	0	0	0	0	0	0	0	0	0	0	0	0	0.0828145	0	0	0	0	0.335054	0.100672	0
1700025C18Rik	0	0	0	0	0	0	0	0	0	0	0	0	0	0	0	0	0	0	0	0	0	0	0	0	0
1700025E21Rik	NA	NA	NA	NA	NA	NA	NA	NA	NA	NA	NA	NA	NA	NA	NA	NA	NA	NA	NA	NA	NA	0	0	0.0925464	0.046084
1700025F22Rik	0	0	0	0	0	0	0	0	0	0	0	0	0	0	0	0	0	0	0	0	0	0	0	0	0
1700025F24Rik	0	0	0	0	0	0	0	0	0	0.0735276	0	0	0	0	0.0367638	0	0	0	0	0	0	0	0	0	0
1700025G04Rik	0.309561	1.7529	0.631013	0.198349	0.138919	0.783554	1.29702	0.470124	0.0581906	0.0797023	0.546558	1.52496	0.550569	0.12827	0.109311	3.82252	2.81198	2.06567	1.3999	2.14787	2.53312	1.36233	1.88762	0.554157	1.39903
1700025K23Rik	NA	NA	NA	NA	NA	NA	NA	NA	NA	NA	NA	NA	NA	NA	NA	NA	NA	NA	NA	NA	NA	1.13172	2.44173	NA	NA
1700025K24Rik	0	0	0	0	0	0	0	0	0	0	0	0	0	0	0	0	0	0	0	0	0	0	0	0	0
1700025M24Rik	0	0	0	0	0	0	0	0	0	0	0	0	0	0	0	0	0	0	0	0	0	0	0	0	0
1700025N23Rik	0	0	0	0	0	0	0.0142419	0	0	0	0	0.00712095	0	0	0	0	0	0.0104882	0	0.0043361	0.0127771	0	0.167388	0.206386	0
1700026D08Rik	0	0	0	0	0	0	0	0	0	0	0	0	0	0	0	0.406471	0.0950647	0.0264473	0	0.0916377	0.0280546	0	0	0.0964504	0
1700026D11Rik	0	0	0	0	0	0	0	0	0	0	0	0	0	0	0	0	0	0	0	0	0	0	0	0	0
1700026F02Rik	0	0	0	0	0	0	0	0	0	0	0	0	0	0	0	0	0	0	0	0	0	0	0	0	0
1700026L06Rik	0.744539	0.571089	0	0	0.37867	0	2.11724	0.240027	0	0.108627	0.372269	1.34416	0.120013	0	0.243648	0.364829	1.10923	1.29608	0.142688	0	0.130939	0	0.49987	0.0750267	0.187473
1700027A15Rik	0	0	0	0	0	0	0	0	0	0	0	0	0	0	0	0	0	0	0	0	0	0	0	0	0
1700027F09Rik	0	0	0	0	0	0	0	0	0	0	0	0	0	0	0	0	0	0	0	0	0	0	0	0	0
1700027H10Rik	0	0	0	0	0	0	0	0	0	0	0	0	0	0	0	0	0	0	0	0	0	0	0	0	0
1700027I24Rik	0	0	0	0	0	0	0	0	0	0	0	0	0	0	0	0	0	0	0	0	0	0	0	0	0
1700027J07Rik	0	0	0	0	0	0	0	0	0	0	0	0	0	0	0	0	0	0	0	0	0	0	0.136543	0	0.0511461
1700028B04Rik	0	0	0	0	0	0	0	0	0	0	0	0	0	0	0	0	0	0	0	0	0	12.4701	1.67527	0	0
1700028D13Rik	0	0	0	0	0	0.227199	0	0	0	0	0.1136	0	0	0	0	0	0	0.0814101	0.0941069	0	0	0	0	0	0
1700028E10Rik	0	0.116526	0.119645	0.472797	0.231739	0	0.185146	0.146927	0.182052	0.199377	0	0.150836	0.133286	0.327425	0.215558	0.0446643	0.0452661	0.149804	0	0.0872689	0.240455	0.312336	0.153154	0.0459262	0.302175
1700028I16Rik	0.408155	0.104357	0.2143	0	0.103793	0.0944242	0.331618	0	0	0	0.25129	0.217988	0.10715	0	0.0518965	0	0	0	0	0	0	0	0	0	0
1700028J19Rik	0.707539	0.814063	0.650108	0	0.269889	0.736583	0.431147	0.0570248	0.141314	0.206458	0.722061	0.622605	0.353566	0.070657	0.238174	0.346699	0.175685	0.146628	0.101698	0	0.217756	0.242534	0	0.142597	0.178157
1700028K03Rik	0.065182	0.0708534	0.104233	0	0	0	0.102453	0.134429	0.0942726	0.0397858	0.032591	0.0866532	0.119331	0.0471363	0.0198929	0.130574	0.255759	0.448447	0.405624	0.198469	0.34153	0	0	0.29272	0.305163
1700028M03Rik	0	0	0	0	0	0	0	0	0	0	0	0	0	0	0	0	0	0	0	0	0	0	0	0	0
1700028P14Rik	0	0	0	0	0	0	0	0	0	0	0	0	0	0	0	0	0	0	0	0	0	0	0	0	0
1700028P15Rik	0	0	0	0	0	0	0	0	0	0	0	0	0	0	0	0	0	0	0	0	0	0	0	0	0
1700029B22Rik	0	0	0	0	0	0	0	0	0	0	0	0	0	0	0	0	0	0	0	0	0	0	0	0	0
1700029F12Rik	0	0	0	0	0	0	0	0	0	0	0	0	0	0	0	0	0	0	0	0	0	0	0	0	0
1700029H14Rik	0	0	0	0	0	0.14126	0.0413397	0.14764	0	0	0.07063	0.0206699	0.07382	0	0	0.0299182	0.0606465	0.126545	0.468108	0.233852	0.174319	0	0	0.0314256	0
1700029I15Rik	1.08283	2.76857	3.97975	32.0148	17.0725	3.00608	2.05283	2.09453	29.4127	14.5345	2.04446	2.4107	3.03714	30.7138	15.8035	0.424476	1.07549	1.25666	2.07521	4.14687	6.66516	2.94993	1.4465	3.05526	2.18124
1700029J03Rik	0	0	0	0	0	0	0	0	0	0	0	0	0	0	0	0	0	0	0	0	0	0	0	0	0
1700029J07Rik	0.0685699	0.529463	0.216014	0.60464	0.453367	0.063453	0.3157	0.198952	0.356076	0.240103	0.0660114	0.422581	0.207483	0.480358	0.346735	0.806394	2.09763	3.84244	1.10386	1.5906	2.73741	0.188187	0.415251	1.11938	1.34673
1700029M20Rik	0	0	0	0	0	0	0	0	0	0	0	0	0	0	0	0	0	0	0	0	0	0	0	0	0
1700029N11Rik	0	0	0	0	0	0	0	0	0	0	0	0	0	0	0	0	0	0	0	0	0	0	0	0	0
1700029P11Rik	0	0	0	0	0	0	0	0	0	0	0	0	0	0	0	0	0	0	0.0406366	0	0	0	0	0	0
1700030A11Rik	0	0	0	0	0	0	0	0	0	0	0	0	0	0	0	0.0498222	0	0	0	0	0	0	0	0	0
1700030C10Rik	0.0285998	0.0584989	0.180194	0	0.0872745	0	0	0.165962	0.137091	0.0333814	0.0142999	0.0292494	0.173078	0.0685455	0.0603279	0.313916	0.181797	0.161212	0.186355	0.164291	0.402378	0.379246	1.00036	0.242087	0.993788
1700030F04Rik	0	0	0	0	0	0	0	0	0	0	0	0	0	0	0	0	0	0	0	0	0	0	0	0	0
1700030F18Rik	0	0	0	0	0	0	0	0	0	0	0	0	0	0	0	0	0.0828126	0.138232	0	0	0.0733168	0.285307	0.279801	0.336079	0.104972
1700030J22Rik	0.911263	0.835553	0.791925	0.325979	0.255705	0.14539	0.97016	0.587553	0.401662	0.275074	0.528327	0.902856	0.689739	0.36382	0.26539	0.209405	0.836421	0.718922	0.14453	0.276779	0.265258	0.0862424	0.253735	0.0633293	0.174069
1700030K09Rik	2.034	2.72093	2.43326	1.42027	2.756	1.92194	3.6776	1.6644	2.19683	1.94569	1.97797	3.19927	2.04883	1.80855	2.35085	4.49055	5.76884	6.40829	3.07783	4.55598	3.87193	2.68596	2.00085	3.1123	4.07941
1700030L20Rik	0	0	0	0	0	0	0	0	0	0	0	0	0	0	0	0.0218177	0	0.00922728	0	0	0.00652539	0	0	0	0
1700030M09Rik	0	0	0	0	0	0	0	0	0	0	0	0	0	0	0	0	0	0	0	0	0	0	0	0	0
1700030N03Rik	0	0	0	0	0	0	0	0	0	0	0	0	0	0	0	0	0	0	0	0	0	0	0	0	0
1700030O20Rik	0	0	0	0	0	0	0	0	0	0	0	0	0	0	0	0	0	0	0	0	0	0	0	0	0
1700031A10Rik	0	0	0	0	0	0	0	0	0	0	0	0	0	0	0	0	0	0	0	0	0	0	0.258203	0.0775158	0
1700031F05Rik	0	0	0	0	0	0	0	0	0	0	0	0	0	0	0	0	0	0	0	0	0	0	0.0505755	0	0
1700031M16Rik	0	0	0	0	0	0	0	0	0	0	0	0	0	0	0	0	0	0	0	0	0	0	0	0	0
1700031P21Rik	0	0	0	0	0	0	0	0	0	0	0	0	0	0	0	0	0	0	0	0	0	0	0	0	0
1700034E13Rik	0	0.651136	0	0	0	0	0	0	0	0	0	0.325568	0	0	0	0	0.379413	0.105554	0.122016	0	0.223938	0	0	0	0
1700034F02Rik	2.16e-107	0.045619	0.047165	0	0.0453726	0.0827008	0	0.0575453	0	9.35e-116	0.0413504	0.0228095	0.0523552	0	0.0226863	0.157606	0.212775	0.0591887	0.0342048	0.0512681	0.0470919	0	0	0.0539687	0.134849
1700034G24Rik	0	0	0	0	0	0	0	0	0	0	0	0	0	0	0	0	0	0	0	0	0	0	0	0	0
1700034H15Rik	3.02e-08	0.0855446	3.28e-09	0.0899779	0.0450018	7.88e-09	0.0241513	0.0152494	0.0351755	0.0144047	1.90556e-08	0.0548479	0.0076247	0.0625767	0.0297033	0.0784213	0.0263658	0.088304	0.0694219	0.0266073	0.0767703	0.16757	0.0697252	0.125316	0.0236874
1700034I23Rik	0	0	0	0	0.020654	0	0	0	0.0486652	0	0	0	0	0.0243326	0.010327	0.0159193	0.0806689	0.127921	0.0622618	0.0777608	0.107128	0.0278605	0.0273229	0.294641	0.0920293
1700034J05Rik	0	0	0	0	0	0	0.0257556	0	0	0	0	0.0128778	0	0	0	0.0372797	0	0	0	0	0	0.0327252	0.0320937	0	0
1700034K08Rik	0	0	0	0	0	0	0	0	0	0	0	0	0	0	0	0	0	0	0	0	0	0	0	0	0
1700034O15Rik	0	0	0	0	0	0	0	0	0	0	0	0	0	0	0	0	0	0	0	0	0	0	0	0	0
1700034P13Rik	4.05e-07	2.9e-08	1.6e-07	1.16e-07	0.206038	6.13e-07	8.82e-08	1e-07	3.29e-07	3.58e-07	5.0879e-07	5.86394e-08	1.2987e-07	2.22721e-07	0.103019	5.50736e-08	5.23239e-08	0.226077	0.0329766	0.131741	0.232369	1.70762	1.20671	0.223802	0.206857
1700036G14Rik	0	0	0	0	0	0	0	0	0	0	0	0	0	0	0	0	0	0	0	0	0	0	0	0	0
1700037C18Rik	2.82328	2.88741	2.45355	2.52488	2.07959	2.88287	2.79483	1.88313	0.855548	1.8181	2.85308	2.84112	2.16834	1.69021	1.94884	1.48838	2.32066	2.48561	0.70899	1.45405	1.33546	3.0698	1.83252	1.25573	1.12763
1700037H04Rik	226.948	54.9606	56.6078	266.745	1255.33	145.465	91.9573	55.0828	267.645	1481.83	186.207	73.459	55.8453	267.195	1368.58	66.1568	62.1852	38.4179	23.458	28.3504	131.842	198.882	75.3121	141.018	51.9309
1700039E15Rik	0	0	0	0	0	0	0	0	0	0.0332067	0	0	0	0	0.0166033	0	0	0	0	0	0	0	0	0	0
1700039E22Rik	0	0	0	0	0	0	0	0	0	0	0	0	0	0	0	0	0	0	0	0	0	0	0	0	0
1700040L02Rik	0	0	0.0882925	0	0	0	0	0	0	0	0	0	0.0441462	0	0	0	0	0	0	0	0.0295738	0.807058	0	1.8979	0.211714
1700040N02Rik	NA	NA	NA	NA	NA	NA	NA	NA	NA	NA	NA	NA	NA	NA	NA	NA	NA	NA	NA	NA	NA	0	0	0.0361269	0
1700041A01Rik	0	0	0	0	0	0	0	0	0	0	0	0	0	0	0	0	0.104356	0	0.10068	0	0	NA	NA	NA	NA
1700041C23Rik	0	0	0	0	0	0	0	0	0	0	0	0	0	0	0	0	0	0	0	0	0	0	0	0	0
1700041M19Rik	0	0	0	0	0	0	0	0	0	0	0	0	0	0	0	0	0	0	0	0	0.0330582	0	0	0	0
1700042B14Rik	0	0	0	0	0	0	0	0	0	0	0	0	0	0	0	0	0	0	0	0.0390772	0	0	0	0	0
1700042G07Rik	0	0	0	0	0	0	0	0	0	0	0	0	0	0	0	0	0	0	0	0	0	0	0	0	0
1700042G15Rik	0	0	0	0	0	0	0	0	0	0	0	0	0	0	0	0	0	0	0	0	0	0	9.36096e-05	0	0
1700042O10Rik	0	0	0	0.207091	0	0	0.162193	0	0.0797412	0	0	0.0810965	0	0.143416	0	0.352146	0.436199	0.198576	0.114773	0.1529	0.526611	0	0	0	0
1700044C05Rik	0	0	0	0	0	0	0	0	0	0	0	0	0	0	0	0	0	0	0	0	0	0	0	0	0
1700044K03Rik	0	0	0	0	0	0	0	0	0	0	0	0	0	0	0	0	0	0	0	0	0	0	0	0	0
1700045H11Rik	0	0	0	0	0	0	0	0	0	0	0	0	0	0	0	0	0	0	0	0	0	0	0	0	0
1700045I19Rik	NA	NA	NA	NA	NA	NA	NA	NA	NA	NA	NA	NA	NA	NA	NA	NA	NA	NA	NA	NA	NA	0	0	NA	NA
1700046C09Rik	0	0	0	0	0	0	0	0	0	0	0	0	0	0	0	0	0	0	0	0	0	0	0	0	0
1700047A11Rik	0	3.41e-07	0	0	0	0	0	0	2.46e-07	0	0	1.70722e-07	0	1.23045e-07	0	0	0.0830116	0.0704239	1.10323e-09	0.0800191	2.19731e-09	NA	NA	NA	NA
1700047E10Rik	0	0	0	0	0	0	0.0161673	0	0	0.139353	0	0.00808365	0	0	0.0696765	1.17786	2.38218	1.43236	1.922	2.38521	0.419939	0	0	0	0
1700047G03Rik	0	0	0	0	0.139035	0	0	0	0	0.0797691	0	0	0	0	0.109402	0.0535815	0.0543034	0	0	0.104692	0.0961531	0	1.10201	0.0550949	25.0212
1700047L14Rik	0	0	0	0	0	0	0	0	0	0	0	0	0	0	0	0	0	0	0	0	0	0	0	0	0
1700047M11Rik	0	0	0	0.748351	0.366889	0	0	0	0.144078	0.210496	0	0	0	0.446215	0.288693	0	0	0	0	0	1.20522	0	0.24218	0.145385	0
1700048M11Rik	0	0	0.981293	0.323143	0	0	0	0.200841	0	0	0	0	0.591067	0.161572	0	0	0.866269	0.516425	0.477574	0.596457	0.657374	0.425712	0	0.251113	0.784336
1700048O20Rik	0.370199	0.865391	0.833021	0.0548633	0.10759	0.244696	0.458332	0.653563	0.0422506	0.0617276	0.307447	0.661861	0.743292	0.048557	0.0846588	3.23843	3.26613	4.48421	3.65699	4.35514	2.30615	0.145103	0.0711515	0.383706	0.319596
1700049E15Rik	0	0	0	0	0	0	0	0	0	0	0	0	0	0	0	0	0	0	0	0	0	0	0	0	0
1700049E22Rik	0	0	0	0	0	0	0	0	0	0	0	0	0	0	0	0	0	0	0.109941	0	0	0	0	0	0
1700049G17Rik	0.187214	0.267754	0.228845	0.204836	0.111581	0.0893285	0.306592	0.164089	0.186957	0.123768	0.138271	0.287173	0.196467	0.195897	0.117675	0.621806	1.72529	1.56001	0.594082	0.995074	1.10863	0.446474	0.266208	0.791892	1.5456
1700049L16Rik	0	0.147684	0	0	0	0.0668138	0.0782168	0	0	0	0.0334069	0.11295	0	0	0	0.254731	0.172109	0.191525	0.0830231	0.138254	0.0507912	0	0	0	0.0727209
1700051A21Rik	0	0	0	0	0	0	0	0	0	0	0	0	0	0	0	0	0	0	0	0	0	0	0	0	0
1700052I22Rik	0	0	0	0	0	0	0	0	0	0	0	0	0	0	0	0	0	0	0	0.384071	0	0	0	0	0
1700052K11Rik	1.36438	4.48679	3.75557	2.73261	2.77124	1.23837	6.16663	6.6606	2.57662	2.24609	1.30137	5.32671	5.20808	2.65462	2.50867	4.37311	5.47357	5.64836	4.18347	6.14008	4.32023	1.24216	1.37708	1.14229	2.04161
1700052N19Rik	3.001	3.1118	4.24553	2.94026	4.53649	4.66699	4.08634	4.72987	4.42874	5.91087	3.83399	3.59907	4.4877	3.6845	5.22368	8.70869	8.22989	6.89637	3.75432	9.05056	12.1827	5.08983	2.80428	5.67857	3.37941
1700054A03Rik	0	0	0	0	0	0	0	0	0	0	0	0	0	0	0	0	0	0	0	0	0	0.206744	0	0	0
1700054K19Rik	0	0	0	0	0	0	0	0	0	0	0	0	0	0	0	0	0	0	0	0	0	0	0	0	0
1700054M17Rik	0	0	0	0	0	0	0	0	0	0	0	0	0	0	0	0	0	0	0	0	0	0	0	0	0
1700054O13Rik	NA	NA	NA	NA	NA	NA	NA	NA	NA	NA	NA	NA	NA	NA	NA	NA	NA	NA	NA	NA	NA	0	0	0	0
1700055C04Rik	0	0	0	0	0	0	0	0	0	0	0	0	0	0	0	0	0	0	0	0	0	0	0	0	0
1700055N04Rik	0.0484371	0.222918	0.0423861	2.73016	51.1175	0.0298817	0.393543	0.135333	2.16701	45.7088	0.0391594	0.308231	0.0888595	2.44859	48.4132	0.297473	0.506744	0.58354	0.139242	0.599774	4.086	0.398719	1.05359	0.188731	1.33753
1700056E22Rik	3.07635	1.63138	2.27327	6.73737	11.358	2.63591	4.25837	1.17542	2.82181	10.0406	2.85613	2.94488	1.72435	4.77959	10.6993	1.83125	2.08225	1.54897	0.0436718	2.44353	4.92933	3.9042	2.75678	4.22521	2.86895
1700057G04Rik	0	0	0	0	0	0	0	0	0	0	0	0	0	0	0	0	0.0407298	0	0.0785902	0	0.0360595	0	0	0	0
1700057H15Rik	0	0	0	0	0	0	0	0	0	0	0	0	0	0	0	0	0	0	0	0	0	0	0	0	0
1700058G18Rik	NA	NA	NA	NA	NA	NA	NA	NA	NA	NA	NA	NA	NA	NA	NA	NA	NA	NA	NA	NA	NA	0	5.02682e-07	0	0
1700060C16Rik	0	0	0	0	0	0	0	0	0	0	0	0	0	0	0	0	0.0783073	0	0	0	0	0	0	0	0
1700060C20Rik	0	0	0	0	0	0	0	0	0	0	0	0	0	0	0	0.0882717	0	0	0	0	0	0	0	0	0
1700061F12Rik	0	0	0	0	0	0	0	0	0	0	0	0	0	0	0	0	0	0	0	0	0	0	0	0	0
1700061G19Rik	0	0	0.0811206	0	0	0.0714863	0.0418434	0.0249045	0	0.0450834	0.0357432	0.0209217	0.0530125	0	0.0225417	0.0151414	0.0613817	0.140881	0.0888291	0.0295844	0.0135858	0.0529997	0.051977	0.0155691	0.0194516
1700061I17Rik	0	0.10116	0	0	0	0	0	0	0	0	0	0.05058	0	0	0	0.0193872	0	0	0	0	0	0	0.0665413	0.0199348	0
1700063A18Rik	0	0	0	0	0	0	0	0	0	0	0	0	0	0	0	0	0	0	0	0	0	0	0	0	0
1700063D05Rik	0	0	0.0451887	0	0	0	0.139855	0	0	0	0	0.0699275	0.0225943	0	0	0	0	0.0570755	0.0164943	0	0.0756805	0	0	0	0
1700063O14Rik	0	0	0	0	0	0	0	0	0	0	0	0	0	0	0	0	0	0	0	0	0	0	0	0	0
1700064J06Rik	0	0	0	0	0	0	0	0	0	0	0	0	0	0	0	0	0	0	0	0	0	0	0	0	0
1700064M15Rik	0	0.201582	0	0	0	0	0.106763	0	0	0	0	0.154172	0	0	0	0	0.0783073	0	0.151098	0	0.207984	0	0	0.0794486	0
1700065D16Rik	0.00029831	0.93974	0	0	1.66e-06	0	0.248853	2.73e-07	0	0	0.000149155	0.594297	1.36408e-07	0	8.2914e-07	0.110804	0.109616	0.15234	0.176096	9.22361e-09	0.323197	0	0	0	5.21625e-08
1700065I16Rik	0	0	0	0	0	0	0	0	0	0	0	0	0	0	0	0	0	0	0	0	0	0	0	0	0
1700065I17Rik	NA	NA	NA	NA	NA	NA	NA	NA	NA	NA	NA	NA	NA	NA	NA	NA	NA	NA	NA	NA	NA	0	0	0	0
1700065J11Rik	0	0	0	0	0	0	0	0	0	0	0	0	0	0	0	0	0	0	0	0	0	0	0	0	0
1700065J18Rik	0	0	0	0	0	0	0.235254	0	0	0	0	0.117627	0	0	0	0.170257	0.172551	0.432038	0.166473	0.166331	0	0	0	0	0
1700065L07Rik	0	0	0	0	0	0	0	0	0	0	0	0	0	0	0	0	0	0	0	0	0	NA	NA	NA	NA
1700065O20Rik	0	0	0	0	0	0	0	0	0	0	0	0	0	0	0	0	0	0	0	0	0	0	0	0	0
1700066B17Rik	0	0	0	0	0	0	0	0	0	0	0	0	0	0	0	0	0	0	0	0	0	0	0	0	0
1700066B19Rik	0	0.0773228	0	0	0.0384526	0	0	0	0	0	0	0.0386614	0	0	0.0192263	0	0.030037	0	0	0	0.0132964	0.103743	0.152611	0.0609497	0.076149
1700066J03Rik	0	0	0	0	0	0	0	0	0	0	0	0	0	0	0	0	0	0	0.106771	0	0	NA	NA	NA	NA
1700066J24Rik	NA	NA	NA	NA	NA	NA	NA	NA	NA	NA	NA	NA	NA	NA	NA	NA	NA	NA	NA	NA	NA	12.9908	13.435	3.89314	5.81943
1700066M21Rik	0.279174	0.571031	1.23778	0.547048	0.946578	1.14818	0.554458	0.580007	0.446067	0.724109	0.713677	0.562744	0.908894	0.496557	0.835344	4.04919	3.42595	3.17817	3.31716	2.8154	3.55681	0.979057	0.459209	1.03776	2.24945
1700066N21Rik	0	0	0	0	0	0	0	0	0	0	0	0	0	0	0	0	0	0	0	0	0	0	0	0	0
1700066O22Rik	0	0	0	0	0	0	0	0	0	0	0	0	0	0	0	0	0	0	0	0	0	0	0	0	0
1700067G17Rik	0	0	0	0	0	0	0	0	0	0	0	0	0	0	0	0	0	0	0	0	0	0	0	0	0
1700067K01Rik	0.493963	0.101037	0.103741	0.102487	0	0	0.214046	0.0636982	0.0789258	0.172965	0.246981	0.157542	0.0837196	0.0907064	0.0864825	0.348545	0.235494	0.425848	0.151466	0.227004	0.416981	0.541752	0.398474	0.318568	0.0995029
1700067P10Rik	0	0	0	0	0	0	0	0	0	0	0	0	0	0	0	0	0	0	0	0	0	0	0	0	0
1700069L16Rik	0	0	0	0	0	0	0	0	0	0	0	0	0	0	0	0	0	0	0	0	0	0	0	0	0
1700069P05Rik	0	0	0	0	0	0	0	0	0	0	0	0	0	0	0	0	0	0	0	0	0	0	0	0	0
1700071K01Rik	0	0	0.0364874	0.108139	0	0	0	0	0	0.0608343	0	0	0.0182437	0.0540695	0.0304172	0.0272419	0.0207067	0	0.0199773	0	0.0183323	1.85764	0.677335	0	0.0262475
1700071M16Rik	0	0	0	0	0	0	0	7.32e-06	0	0	0	0	3.65885e-06	0	0	0.052675	0.0785911	2.23975e-08	2.05618e-08	4.52356e-09	9.49344e-08	0.0792142	0.0759041	0.278542	0.0399451
1700072B07Rik	0	0	0	0	0	0	0	0	0	0	0	0	0	0	0	0	0	0	0	0	0	0	0	0	0
1700072O05Rik	0	0	0	0	0	0	0	0	0	0	0	0	0	0	0	0	0	0	0	0	0	0.256495	0	0.0755117	0
1700073E17Rik	0	0	0	0.0102617	0.0201237	0.0183072	0	0	0	0	0.0091536	0	0	0.00513085	0.0100619	0.0116329	0.0157195	0.0229593	0.0151658	0.0227292	0.0208755	0	0.07545	0.00797431	0.109592
1700074P13Rik	0	0	0	0	0	0	0	0	0	0	0	0	0	0	0	0	0	0	0	0	0	0	0	0	0
1700080E11Rik	0	0	0	0	0	0	0	0	0	0	0	0	0	0	0	0	0	0	0	0	0	0	0	0	0
1700080N15Rik	0	0	0	0	0	0	0	0	0	0	0	0	0	0	0	0	0	0	0	0	0	0	0	0	0
1700080O16Rik	0	0	0	0	0	0	0	0	0	0	0	0	0	0	0	0	0	0	0	0	0	0	0	0	0.0700534
1700081H04Rik	0	0	0	0	0	0	0	0	0	0	0	0	0	0	0	0	0	0	0	0	0	0	0	0	0
1700081H22Rik	NA	NA	NA	NA	NA	NA	NA	NA	NA	NA	NA	NA	NA	NA	NA	NA	NA	NA	NA	NA	NA	0	0	0	0
1700084C01Rik	0	0	0	0.145943	0	0	0	0.0453536	0	0.0410507	0	0	0.0226768	0.0729715	0.0205254	0.0275741	0.0279456	0.0466472	0.0808835	0.0808144	0.0247411	0	0.0946115	0	0
1700084E18Rik	1.88907	1.93198	1.19022	5.48718	2.69016	1.39848	1.22787	0.487204	4.22572	2.86637	1.64377	1.57993	0.838712	4.85645	2.77827	0.88863	0.750502	1.0022	2.02738	2.17034	2.12622	3.0951	1.01179	1.97975	0.761061
1700084F23Rik	0	0	0	0	0	0	0	0	0	0	0	0	0	0	0	0	0	0	0	0	0	0	0	0	0
1700084J12Rik	1.15464	1.68696	1.99193	3.16566	1.51006	2.67119	2.09961	1.6662	2.4379	1.9734	1.91291	1.89329	1.82906	2.80178	1.74173	7.82396	3.75717	4.1567	4.14114	6.00111	4.81546	0.90366	1.44011	1.26326	1.66135
1700084M14Rik	0	0	0	0	0	0	0	0	0	0	0	0	0	0	0	0	0	0	0	0	0	NA	NA	NA	NA
1700085B03Rik	NA	NA	NA	NA	NA	NA	NA	NA	NA	NA	NA	NA	NA	NA	NA	NA	NA	NA	NA	NA	NA	0	0	0	0
1700085C21Rik	0	0	0	0	0	0	0	0	0	0	0	0	0	0	0	0	0	0	0	0	0	0	0	0	0
1700086L19Rik	0	0	0	0	0	0	0	0	0	0	0	0	0	0	0	0	0	0	0	0	0	0	0	0	0
1700086O06Rik	0.63883	0.899832	1.87372	2.75254	1.69468	0.630084	1.30526	1.48947	3.6745	1.81401	0.634457	1.10255	1.68159	3.21352	1.75435	2.07523	1.5795	1.54469	1.49006	3.32433	4.56172	7.96426e-07	1.43593e-07	2.87633	1.10899
1700088E04Rik	3.45935	6.81935	5.99149	4.30403	2.14614	0.952349	5.28016	3.81028	0.867011	1.99248	2.20585	6.04976	4.90088	2.58552	2.06931	1.66874	3.62669	4.62238	3.32753	3.35568	1.73744	3.16757	1.51431	2.12345	1.36649
1700091E21Rik	NA	NA	NA	NA	NA	NA	NA	NA	NA	NA	NA	NA	NA	NA	NA	NA	NA	NA	NA	NA	NA	0	0	0	0
1700091H14Rik	0	0	0	0	0	0.0226501	0	0	0	0	0.011325	0	0	0	0	0.479269	0.304369	0.392811	0.36401	1.41777	0.231157	0	0	0.044397	0
1700092C02Rik	0	0	0	0	0	0	0	0	0	0	0	0	0	0	0	0	0	0.186339	0	0	0	0	0	0	0
1700092C10Rik	0	0	0	0	0	0	0	0	0	0	0	0	0	0	0	0.0933483	0	0.0789589	0	0	0.0837578	0	0	0	0
1700092E19Rik	0	0	0	0	0	0	0	0	0	0	0	0	0	0	0	0	0	0.0200615	0	0	0	0	0	0	0
1700092K14Rik	0	0	0	0	0	0	0	0	0	0	0	0	0	0	0	0	0	0	0	0	0	0	0	0	0
1700092M07Rik	2.46506	1.51264	2.07083	0.511449	2.00595	0.912445	0.534085	2.54303	1.18161	0	1.68875	1.02336	2.30693	0.84653	1.00297	0.579791	0.979338	1.47125	0.94484	0.56642	0.173408	1.34403	0.659048	0.596167	0.744837
1700093K21Rik	0	0	0	0.0808168	0	0	0	0	0	0	0	0	0	0.0404084	0	0.0427049	0.0432803	0.0361221	0.0597206	0.0298343	0.0383175	0.149329	0.146448	0.408317	0.313863
1700094D03Rik	0.0901631	0.187217	0.0350665	0.283438	0.183426	0.0834348	0.211628	0.116268	0.0720317	0.35321	0.0867989	0.199423	0.0756673	0.177735	0.268318	0.567951	0.837908	1.19571	0.660911	0.641382	0.835114	0.453685	0.930309	1.31684	0.968655
1700094J05Rik	6.18e-196	0.164715	6.92e-148	7.56e-135	0	1.11e-273	4.77e-283	4.96e-289	1.85e-280	0	3.0906e-196	0.0823575	3.4585e-148	3.7795e-135	0	0	2.98595e-207	0.0498117	1.45368e-250	2.91985e-214	0	3.36037e-08	0.165172	1.55971e-07	2.95107e-07
1700094M24Rik	0	0	0	0	0	0	0	0	0	0	0	0	0	0	0	0	0	0	0	0	0	0	0	0	0
1700095A21Rik	0	0	0	0	0	0	0	0	0	0	0	0	0	0	0	0	0	0	0.0192615	0	0	0.0688914	0	0	0
1700095B10Rik	0	0	0	0	0	0	0	0	0	0	0	0	0	0	0	0	0	0	0	0	0	0	0	4.49595e-08	0
1700095B22Rik	NA	NA	NA	NA	NA	NA	NA	NA	NA	NA	NA	NA	NA	NA	NA	NA	NA	NA	NA	NA	NA	0	0	0	0.0988292
1700095J12Rik	0	0	0	0	0	0	0	0	0	0	0	0	0	0	0	0	0	0	0	0	0	NA	NA	NA	NA
1700096J18Rik	0	0	0	0	0	0	0	0	0	0	0	0	0	0	0	0	0	0.115259	0	0	0	0.474816	0	0	0
1700096K18Rik	0.488828	0.428513	0.219992	2.02843	2.69926	0.129243	1.51301	0.675387	1.67369	2.52675	0.309036	0.970762	0.44769	1.85106	2.613	0.958117	3.38472	3.35748	0.455027	3.20921	7.12307	3.16062	2.53607	5.01034	5.09927
1700097N02Rik	0	0	0	0	0	0	0	0	0	0	0	0	0	0	0	0	0	0	0	0	0	0	0	0	0
1700100I10Rik	0	0	0	0	0.0116105	0	0	0	0	0	0	0	0	0	0.00580525	0.0179121	0.00907428	0.0530382	0.00437499	0.0315019	0	NA	NA	NA	NA
1700100L14Rik	0	0	0	0	0	0	0	0	0.145283	0	0	0	0	0.0726415	0	0	0	0.0602985	0	0	0	0	0	0	0
1700101E01Rik	0	0.122296	0	0	0	0	0.0647709	0	0	0	0	0.0935335	0	0	0	0.0468759	0.427567	0.396501	0.183336	0.137385	0.0420599	0	0	0	0.105987
1700101I11Rik	0	0	0	0.299607	0.734972	0	2.39e-11	0.0931351	1.04e-10	0.33766	0	1.19653e-11	0.0465675	0.149804	0.536316	0.169962	0.172224	0.191699	0.166266	0.110644	0.101608	1.41183e-09	6.2076e-11	0.058226	0.21823
1700101O22Rik	0	0	0	0	0	0	0	0	0	0	0	0	0	0	0	0	0	0	0	0	0	0	0	0	0
1700102H20Rik	0	0	0	0	0	0	0	0	0	0.768045	0	0	0	0	0.384022	0.171966	0.347121	0.290885	0.504435	0.336003	1.0801	8.72564e-07	0	0.530469	0.220917
1700102P08Rik	0	0.795637	0.204234	0.302646	0	0.269967	0.105347	0.250803	0.23307	0.0567521	0.134984	0.450492	0.227519	0.267858	0.028376	0.343088	0.231807	0.0967338	0.63365	0.409659	0.23943	0	0	0.0391976	0.146917
1700104A03Rik	NA	NA	NA	NA	NA	NA	NA	NA	NA	NA	NA	NA	NA	NA	NA	NA	NA	NA	NA	NA	NA	0	0	0	0
1700104L18Rik	0	0	0	0	0	0	0	0	0	0	0	0	0	0	0	0	0	0	0	0	0	NA	NA	NA	NA
1700105P06Rik	0	0.253249	0.520056	0	0	0.229146	0.134127	0.15966	0	0	0.114573	0.193688	0.339858	0	0	0.19414	0.196756	0	0.189825	0.379326	0.0870972	0	0.664404	0	0
1700106J16Rik	0	0	0	0	0	0	0	0	0	0	0	0	0	0	0	0	0	0	0	0	0	0	0	0.0345254	0
1700108F19Rik	0	0	0	0	0.133174	0	0	0	0.313785	0.076406	0	0	0	0.156892	0.10479	0.102645	0.156042	0.0434113	0.30109	0.100278	0.552596	0	0	0.0527721	0.0659322
1700108J01Rik	0	0	0	0	0	0	0	0	0	0	0	0	0	0	0	0	0	0	0	0	0	0	0	0	0
1700109F18Rik	NA	NA	NA	NA	NA	NA	NA	NA	NA	NA	NA	NA	NA	NA	NA	NA	NA	NA	NA	NA	NA	0	0.395909	0.0593894	0.148399
1700109G14Rik	0	0	0	0	0	0	0	0	0	0	0	0	0	0	0	0	0.0581421	0.0970517	0	0	0	0	0	0.0589895	0
1700109G15Rik	0	0	0	0	0	0	0	0	0	0	0	0	0	0	0	0	0	0	0	0	0	0	0	0	0
1700109H08Rik	0.170112	0	4.12e-163	0.176473	0.865183	6.86e-261	5.75e-119	0	2.75e-100	0	0.085056	2.8756e-119	2.0578e-163	0.0882365	0.432592	0.574362	0.173675	0.424476	0.859175	0.404903	0.6916	0.307008	0	0.179238	0.398864
1700109I08Rik	0	0	0	0	0	0	0	0	0	0	0	0	0	0	0	0	0	0	0	0	0	0	0	0	0
1700109K24Rik	0.490618	0.501763	0.309116	0.508965	0.299432	0.0908013	0.265746	0.695936	0.54874	0.171793	0.29071	0.383754	0.502526	0.528852	0.235613	0.346185	0.974581	0.943536	0.60176	0.638824	0.621237	NA	NA	NA	NA
1700110C19Rik	0.167814	0	0	0	0	0	0	0	0.134067	0.0979354	0.083907	0	0	0.0670335	0.0489677	0	0.13334	0.222574	0	0.0642668	0.236101	0	0	0	0.338041
1700110K17Rik	7.83e-09	0	0	0	0.175439	0	5.38e-10	0	0.13779	0.101137	3.91503e-09	2.69199e-10	0	0.068895	0.138288	1.24446e-09	2.93691e-08	7.05918e-09	0	7.94383e-11	1.40143	0	5.6544e-09	1.87525e-10	0
1700110M21Rik	NA	NA	NA	NA	NA	NA	NA	NA	NA	NA	NA	NA	NA	NA	NA	NA	NA	NA	NA	NA	NA	0	0	0	0
1700111N16Rik	0	0	0	0	0	0	0	0	0	0	0	0	0	0	0	0	0	0	0	0	0	0	0	0	0
1700112E06Rik	0	0.25151	0.129121	0	0	0.227572	0.266411	0.237845	0	0.21528	0.113786	0.25896	0.183483	0	0.10764	0.144605	0.244256	0.163086	0.0942606	0.04709	0.172998	2.86472	5.45362	4.85719	9.22652
1700112H15Rik	0	0	0	0	0	0	0	0	0	0	0	0	0	0	0	0.0593676	0	0	0	0	0	0	0	0	0
1700112J05Rik	1.42e-06	0	0	0	9.17e-07	0	3.22e-07	9.95e-08	0	0	7.08365e-07	1.61175e-07	4.97738e-08	0	4.58715e-07	0.0571767	1.1074e-07	0.048363	3.21165e-08	0.0695971	0.0675257	NA	NA	NA	NA
1700113A16Rik	6.02634	6.50564	5.15632	9.03023	4.99477	6.19626	7.01198	5.82838	6.95424	6.51286	6.1113	6.75881	5.49235	7.99223	5.75382	2.88733	5.58644	6.58669	6.88678	8.46222	4.0823	5.81271	6.90067	8.41183	4.72086
1700113H08Rik	0	0	0	0	0	0	0	0	0	0	0	0	0	0	0	0	0	0	0	0	0	0	0	0.0307672	0.345958
1700119H24Rik	0	0	0	0	0	0	0	0	0	0	0	0	0	0	0	0	0.0903973	0.150893	0	0	0	0	0	0.18343	0
1700120C14Rik	1.04345	0.559035	0.584337	5.15e-121	1.01864	1.07e-152	1.3163	1.31838	1.19083	0.897787	0.521725	0.937667	0.951358	0.595415	0.958214	1.67233	1.52778	1.13132	1.56714	1.26481	0.676248	6.70413e-105	1.33844e-84	1.38392	1.04746
1700120E14Rik	0	0	0	0	0	0	0	0	0	0	0	0	0	0	0	0	0	0	0	0	0	0	0	0	0
1700120G07Rik	0	0	0	0	0	0	0	0	0	0	0	0	0	0	0	0	0	0	0	0	0.0449664	0	0	0	0
1700120K04Rik	1.02554	0.52442	1.07691	0.265973	1.04318	0.711761	0.277745	0.495928	1.63862	0.299251	0.86865	0.401083	0.786419	0.952296	0.671215	0.904543	0.814871	0.680097	1.76887	1.08006	0.721432	0.350679	1.03174	0.620061	0.129115
1700121L16Rik	0	0	0	0	0	0	0	0	0	0	0	0	0	0	0	0	0	0	0	0	0	0	0	0	0
1700121N20Rik	0	0	0	0	0	0	0	0	0	0	0	0	0	0	0	0	0	0	0	0	0	0	0	0	0
1700122O11Rik	0	0	0	0	0	0	0	0	0	0	0	0	0	0	0	0	0	0	0	0	0	0	0	0	0
1700123I01Rik	0	0	0	0	0	0	0	0	0	0	0	0	0	0	0	0	0	0	0	0	0.0217037	0	0	0.024872	0.0310745
1700123K08Rik	0	0	0	0	0	0	0	0	0	0	0	0	0	0	0	0	0.0409714	0	0	0	0	0	0	0	0
1700123L14Rik	0	0	0	0	0	0	0	0	0	0	0	0	0	0	0	0	0	0	0	0	0	0.0795629	0	0.0467577	0
1700123M08Rik	0.504276	0.206292	0.211814	0.31388	0.205178	0.279987	0.273143	0.130056	0.161147	0	0.392132	0.239718	0.170935	0.237513	0.102589	0.316286	0.400684	0.46818	0.231942	0.347616	0.283791	0.829569	0.813562	0.243915	0.457112
1700123O12Rik	0	0	0	0	0	0	0	0	0	0	0	0	0	0	0	0	0	0.0791757	0	0	0	0	0	0	0
1700123O20Rik	7.34724	13.4969	18.7727	18.7501	12.6839	12.8861	14.1185	22.2919	18.7639	11.5797	10.1167	13.8077	20.5323	18.757	12.1318	17.3452	18.7904	17.3056	24.4246	21.4139	15.2478	8.17535	7.54234	8.07731	8.16895
1700123O21Rik	0	0	0	0	0	0	0	0	0	0	0	0	0	0	0	0	0	0	0	0	0	0	0	0.0743898	0
1700124L16Rik	1.21564	0	1.27654	0.630551	0	0.562464	0	0	0.485592	0	0.889052	0	0.63827	0.558072	0	0.476539	0.241479	0.403081	2.79568	0.931097	0.641369	NA	NA	NA	NA
1700125D06Rik	NA	NA	NA	NA	NA	NA	NA	NA	NA	NA	NA	NA	NA	NA	NA	NA	NA	NA	NA	NA	NA	0	0.329398	NA	NA
1700125G02Rik	0	0	0	0	0	0	0	0	0	0	0	0	0	0	0	0	0	0	0	0	0	0	0	0	0
1700125G22Rik	0	0	0	0	0	0	0	0	0	0	0	0	0	0	0	0	0.052568	0	0.0507163	0	0.139621	0	0	0	0
1700125H03Rik	0	0.318566	0.981288	0	0	0	0	0	0	0	0	0.159283	0.490644	0	0	0.122108	0.618762	0.41314	0.119393	0	0	0	0	0	0
1700125H20Rik	0	0	0	0	0	0	0.366451	0.218106	0	0	0	0.183226	0.109053	0	0	0	0.0895935	0.0373877	0.0432188	0.0431819	0.0793201	0	0.151568	0.0454497	0
1700126H18Rik	0	0	0	0	0	0	0	0	0	0	0	0	0	0	0	0	0	0	0	0	0	0	0	0	0
1700128A07Rik	0	0	0	0	0	0	0	0	0	0	0	0	0	0	0	0	0	0	0	0	0	0	0	0	0
1700128F08Rik	0	0	0	0	0	0	0	0	0.0153322	0	0	0	0	0.0076661	0	0.00537372	0	0	0	0	0	0	0	0	0.00805399
1700129C05Rik	0	0	0	0	0	0	0	0	0	0	0	0	0	0	0	0	0	0	0	0	0	0	0	0	0
1810006J02Rik	0	0	0	0	0	0	0	0	0	0	0	0	0	0	0	0	0	0	0	0	0	0	0.315475	0.0236311	0.118096
1810006K21Rik	NA	NA	NA	NA	NA	NA	NA	NA	NA	NA	NA	NA	NA	NA	NA	NA	NA	NA	NA	NA	NA	3.61022e-06	4.89184e-06	NA	NA
1810007C17Rik	0	0	0	0	0	0	0	0	0	0	0	0	0	0	0	0	0	0	0	0	0	0	0	0	0
1810007D17Rik	0	0	0	0	0	0	0	0	0	0	0	0	0	0	0	0	0	0	0	0	0	0	0	0	0
1810007I06Rik	NA	NA	NA	NA	NA	NA	NA	NA	NA	NA	NA	NA	NA	NA	NA	NA	NA	NA	NA	NA	NA	0	0	0	0
1810008A18Rik	NA	NA	NA	NA	NA	NA	NA	NA	NA	NA	NA	NA	NA	NA	NA	NA	NA	NA	NA	NA	NA	6.06163	7.36507	NA	NA
1810008I18Rik	0	0	0	0	0	0	0	0	0	0.104168	0	0	0	0	0.052084	0	0	0	0	0	0.0627815	0	0	0.0719465	0.0898882
1810009A15Rik	26.7532	38.1187	42.1522	31.6652	17.4872	59.1573	34.2658	32.631	28.8477	12.7385	42.9552	36.1923	37.3916	30.2565	15.1128	111.147	75.3091	50.8632	71.6774	84.1206	26.5653	21.1304	19.7291	23.4	24.6024
1810009J06Rik	0	0	0	0	0	0	0	0	0	0	0	0	0	0	0	0	0	0	0	0	0	0	0	0	0
1810010D01Rik	0	0	0	0	0.12097	0	0.128833	0.306717	0	0.0694044	0	0.0644165	0.153359	0	0.0951872	0.0466195	0.283485	0.236599	0.911664	0.455443	0.0836596	0.325982	0	0.239681	0.239561
1810010H24Rik	0.874233	1.39081	0.714019	2.11616	5.23677	0.179777	1.26275	1.06472	2.01769	3.74146	0.527005	1.32678	0.88937	2.06692	4.48911	0.456939	1.35069	1.44939	0.297855	1.0044	3.62161	0.932202	0.65301	2.07515	3.71775
1810011H11Rik	0	0	0	0	0	0	0	0	0	0	0	0	0	0	0	0	0	0	0	0	0	0.375869	5.43708	0.579929	2.03564
1810011O10Rik	0.771433	2.68245	20.8189	20.1671	7.45461	0.142773	2.7996	15.4192	21.8787	6.61801	0.457103	2.74103	18.1191	21.0229	7.03631	1.48179	2.81962	1.96959	87.3451	15.7465	2.95758	169.479	56.4403	89.0243	34.2648
1810012K16Rik	0	0	0.270025	0.26676	0	0	0.139283	0.165798	0	0	0	0.0696415	0.217912	0.13338	0	0.100802	0.30648	0.852636	0.295684	0.0984772	0.180891	0	0	0.829193	0.38849
1810013A23Rik	0.407913	0	0	0	0	0	0	0	0	0	0.203957	0	0	0	0	0.159904	0.162058	0.27051	0.15635	0.156216	0.286951	0	0	0.16442	0.205423
1810013D10Rik	NA	NA	NA	NA	NA	NA	NA	NA	NA	NA	NA	NA	NA	NA	NA	NA	NA	NA	NA	NA	NA	38.4465	12.6201	35.7891	14.4182
1810013L24Rik	2.51633	3.74535	3.79842	4.68479	3.63371	6.9233	4.89214	3.85332	4.6309	3.59263	4.71981	4.31874	3.82587	4.65785	3.61317	15.4128	15.1384	12.9997	9.19711	10.7294	16.6781	8.81899	8.8605	4.80877	15.2745
1810014B01Rik	0.122801	0.25118	0.322379	0.605115	2.09227	0.255683	0.648526	0.514655	1.32443	2.43664	0.189242	0.449853	0.418517	0.964773	2.26445	1.29974	1.93522	1.56765	0.470685	1.56369	2.17044	2.18977	1.15635	3.304	2.8138
1810018F18Rik	0	0	0	0	0	0	0	0	0	0	0	0	0	0	0	0	0	0	0	0	0	0	0	0	0
1810019D21Rik	0.148233	0.758017	0.233489	0.307556	0.376959	0.0685836	0.200731	0.143365	0.177637	0	0.108408	0.479374	0.188427	0.242596	0.188479	0.580947	0.971726	0.36864	0.511361	0.397385	0.834229	0.959052	0.19937	1.25477	0.0373236
1810019J16Rik	NA	NA	NA	NA	NA	NA	NA	NA	NA	NA	NA	NA	NA	NA	NA	NA	NA	NA	NA	NA	NA	0.0777455	0	0	0.057115
1810020O05Rik	0	0.210941	0	0	0	0	0	0	0	0.12037	0	0.10547	0	0	0.060185	0.161707	0.0409714	0.581315	0	0	0.362733	0.141373	0	0.249411	0.103869
1810021B22Rik	1.15899	3.95104	2.43408	8.21589	15.9153	0.714999	5.85919	4.73275	5.4012	13.1894	0.936994	4.90512	3.58342	6.80854	14.5524	0.757215	2.22551	3.907	1.40673	3.40286	4.95976	7.66905	2.33412	11.679	2.72375
1810022K09Rik	10.5817	21.1931	29.1682	51.2277	48.8846	36.7201	29.3745	13.3611	44.0299	39.1109	23.6509	25.2838	21.2646	47.6288	43.9978	126.343	95.4648	80.9914	110.945	105.194	107.315	31.8761	25.3627	68.066	53.9549
1810024B03Rik	0.0818643	0.334895	0.0859649	0.169851	0	0.151511	0.0443422	0.15835	0.130804	0.143327	0.116688	0.189619	0.122157	0.150328	0.0716635	0.192548	0.195142	0.407167	0.0313779	0.188107	0.259148	0.224517	0.440369	0.362974	0.206132
1810026B05Rik	0.340489	0.383628	0.371924	0.287251	0.680475	0.512557	0.64609	0.235143	0.286155	0.585935	0.426523	0.514859	0.303534	0.286703	0.633205	1.02995	2.25259	2.58661	1.58349	2.31783	1.53739	2.56228	2.07073	1.64047	2.08557
1810026J23Rik	9.00009	11.1877	17.0691	15.067	15.9232	16.4383	12.569	24.0802	21.9697	22.3649	12.7192	11.8783	20.5746	18.5184	19.1441	10.7735	8.47678	10.1673	15.7255	14.1849	10.6228	11.2392	9.33498	9.46883	9.96789
1810027O10Rik	NA	NA	NA	NA	NA	NA	NA	NA	NA	NA	NA	NA	NA	NA	NA	NA	NA	NA	NA	NA	NA	53.83	72.2677	NA	NA
1810030J14Rik	NA	NA	NA	NA	NA	NA	NA	NA	NA	NA	NA	NA	NA	NA	NA	NA	NA	NA	NA	NA	NA	0	0	NA	NA
1810030O07Rik	3.35809	5.85585	4.67785	4.81243	6.78823	4.43888	9.68945	5.68119	6.38102	5.83183	3.89848	7.77265	5.17952	5.59673	6.31003	15.9152	21.699	18.9059	9.92236	14.9471	11.392	4.28253	4.7434	6.11138	11.6378
1810032O08Rik	3.81871	6.10446	7.21744	5.78721	1.3167	5.84512	3.23301	2.46747	2.27345	0.610268	4.83192	4.66873	4.84246	4.03033	0.963484	9.72539	5.63238	5.8227	11.6988	13.0392	5.66176	3.17801	4.47754	6.22912	1.42619
1810033B17Rik	NA	NA	NA	NA	NA	NA	NA	NA	NA	NA	NA	NA	NA	NA	NA	NA	NA	NA	NA	NA	NA	0	0.125965	0.0377617	0.235893
1810034E14Rik	0.326447	0.278219	0.0571332	0.395097	1.54961	0.45313	0.766227	0.140322	0.173867	1.65111	0.389788	0.522223	0.0987276	0.284482	1.60036	0.213282	0.907853	0.613377	0.166833	0.16669	0.344465	2.23914	0.585583	1.22811	0.794587
1810035I16Rik	NA	NA	NA	NA	NA	NA	NA	NA	NA	NA	NA	NA	NA	NA	NA	NA	NA	NA	NA	NA	NA	0	0	0	0
1810037I17Rik	5.91206	7.54355	8.45498	4.43922	11.1683	13.7554	10.1254	9.22118	4.36331	9.62785	9.83373	8.83447	8.83808	4.40127	10.3981	36.6837	28.4315	20.5926	19.1859	36.1395	22.5373	29.4038	35.4211	19.45	27.2209
1810041L15Rik	0	0	0	0.0315774	0.0154812	0	0	0	0	0	0	0	0	0.0157887	0.0077406	0	0	0	0.0116671	0	0	0	0	0.0245387	0.061316
1810043G02Rik	45.1615	52.3854	46.6894	26.3571	40.4847	23.2414	37.845	29.3441	15.4096	29.9269	34.2015	45.1152	38.0168	20.8834	35.2058	5.57377	6.80642	7.92205	5.20419	6.33788	6.2719	10.7913	8.38809	9.8182	10.3298
1810043H04Rik	24.5742	14.0987	21.7141	19.5862	35.9708	30.5054	24.0242	21.6414	21.0689	39.1764	27.5398	19.0615	21.6777	20.3275	37.5736	20.4412	14.6445	15.5016	10.338	14.5756	14.5464	70.049	40.9774	40.8292	17.5067
1810044D09Rik	1.84909	3.46701	2.26534	6.39413	7.21006	2.28148	6.67714	5.36506	4.18554	6.11503	2.06528	5.07207	3.8152	5.28984	6.66254	5.55722	5.63209	3.67872	1.41749	4.13081	5.09468	5.47568	7.02234	3.22976	7.44956
1810046K07Rik	0	0	0	0	0	0	0	0	0	0	0	0	0	0	0	0	0.0310056	0.0258776	0	0	0.0549006	0.321075	0	0.12583	0.0393023
1810053B23Rik	0	0	0	0	0	0	0	0	0	0	0	0	0	0	0	0	0	0	0	0	0	0	0	0	0
1810055G02Rik	58.3427	77.844	301.048	60.8469	22.0307	80.7438	66.0799	249.057	36.4272	17.871	69.5433	71.962	275.053	48.6371	19.9508	48.2803	31.207	34.4812	134.214	62.1681	25.0589	3.2698	5.22833	1.87966	8.71519
1810058I24Rik	122.024	291.916	198.075	157.369	162.128	82.9003	186.09	150.103	95.9881	181.903	102.462	239.003	174.089	126.679	172.016	69.3436	99.0915	109.527	71.5251	80.0365	159.745	23.5746	39.4603	31.8221	68.323
1810062G17Rik	0.122962	0.50302	0	1.14804	1.25076	0	0.532823	0	0.0982348	0.789359	0.061481	0.517922	0	0.623137	1.02006	1.01224	1.41668	1.22315	0.235651	0.565081	2.55172	0.842564	1.15683	2.03209	1.54807
1810062O18Rik	0.500185	0.611227	0.554839	2.74644	1.29321	0.175292	1.28085	1.27444	0.625242	0.403695	0.337738	0.946039	0.91464	1.68584	0.848453	0.0698999	0.379455	0.882136	0.687659	0.419369	0.41998	0.830658	1.33572e-07	0.864426	0.527214
1810064F22Rik	0	0	0	0	0	0	0.00280592	0	0.00551806	0	0	0.00140296	0	0.00275903	0	0	0.00205805	0	0	0.0224838	0	0	0	0	0.0238515
1810065E05Rik	0	0	0	0	0	0	0	0	0	0	0	0	0	0	0	0	0	0	0	0	0	0	0	0	0
2010001E11Rik	0	0.128189	0.270553	0.158925	0.212495	0	0.25271	0.0628572	0.150205	0.231639	0	0.190449	0.166705	0.154565	0.222067	0.0573239	0.171522	0.230893	0.0907472	0.149338	0.237578	0.157648	0.10307	0.25963	0.308595
2010001M06Rik	NA	NA	NA	NA	NA	NA	NA	NA	NA	NA	NA	NA	NA	NA	NA	NA	NA	NA	NA	NA	NA	2.96279	6.30936	2.39698	3.25297
2010002M12Rik	0	0	0	0	0	0	0.153956	0	0	0.0080263	0	0.076978	0	0	0.00401315	0.0485219	0.832343	1.07166	0.0474434	0.0263349	0.0580491	0.339739	0.246803	0.0221744	0.427106
2010003K11Rik	0	0	0.85321	18.6373	58.9555	0	0.0489	0.232836	13.1266	85.9315	0	0.02445	0.543023	15.8819	72.4435	0.0353899	0.0358667	0.0299346	0.10381	1.93613	11.1456	5.81775	4.00598	3.7845	7.00147
2010003K15Rik	NA	NA	NA	NA	NA	NA	NA	NA	NA	NA	NA	NA	NA	NA	NA	NA	NA	NA	NA	NA	NA	0	0	NA	NA
2010003O02Rik	NA	NA	NA	NA	NA	NA	NA	NA	NA	NA	NA	NA	NA	NA	NA	NA	NA	NA	NA	NA	NA	44.9546	64.0541	34.9484	46.134
2010005H15Rik	0	0	0	0	0	0	0	0	0	0	0	0	0	0	0	0	0	0.0444731	0	0	0	0.183422	0	0	0.13509
2010009K17Rik	0	0	0	0	0	0	0	0.153119	0	0	0	0	0.0765595	0	0	0.10069	0.149663	0.0787432	0.182048	0.115111	0	0	0	0	0
2010010A06Rik	5.61749	0.503956	0.206978	0.204476	0	4.65111	0.587196	0.19063	0	0.172544	5.1343	0.545576	0.198804	0.102238	0.086272	0.656764	0.195768	0.359457	0.302195	0.0377422	0.034664	0.134915	0.264623	0	0.347414
2010012O05Rik	2.24858	3.06622	1.99083	2.6071	3.23403	3.10078	5.96905	3.13416	2.97053	3.83387	2.67468	4.51764	2.5625	2.78882	3.53395	6.32057	7.09253	6.30675	2.56507	4.35508	7.19563	3.62957	4.50874	6.27673	9.71339
2010015L04Rik	NA	NA	NA	NA	NA	NA	NA	NA	NA	NA	NA	NA	NA	NA	NA	NA	NA	NA	NA	NA	NA	0.127159	0.207457	0.205251	0.138698
2010016I18Rik	0	0	0	0	0	0	0	0	0	0	0	0	0	0	0	0	0.204083	0.0309722	0	0.0245908	1.12926	0.899887	0.582008	0.686292	8.08414
2010106C02Rik	0	0	0	0	0	0	0	0	0	0	0	0	0	0	0	0	0	0	0	0	0	0	0.51527	0	0
2010106E10Rik	0	0	0	0	0	0	0	0	0	0	0	0	0	0	0	0	0	0	0	0	0.0580704	0	0	0.0332677	0.54051
2010107E04Rik	76.9522	96.3115	102.28	196.69	305.985	112.541	152.735	137.399	218.826	341.057	94.7466	124.523	119.84	207.758	323.521	156.946	174.454	133.467	123.344	190.216	295.87	362.12	131.557	469.749	123.304
2010107G12Rik	0	0.0910135	0	0	0	0	0.0241015	0.0573791	0.0710962	0	0	0.0575575	0.0286896	0.0355481	0	0.0697707	0.0707107	0.132785	0.017055	0.0681616	0.0939038	0.0610496	0.119743	0	0.918727
2010107G23Rik	5.1813	0.698769	0.478316	1.65386	3.47498	2.16023	3.39245	1.06463	1.13719	1.46205	3.67076	2.04561	0.771473	1.39552	2.46852	0	0	0	0	0	0	1.17158	0.0765982	1.19341	0.602142
2010109A12Rik	0	0	0.265317	0	0	0	0	0	0	0	0	0	0.132659	0	0	0	0	0	0	0	0.266606	0	0	0.611052	0.254478
2010109I03Rik	0	0	0	0	0	0	0.0044843	0	0	0	0	0.00224215	0	0	0	0.00339879	0.0246682	0	0.00576028	0	0.0210825	0.212615	0	0.00541934	0.0260159
2010111I01Rik	11.6496	7.45012	4.59642	2.20542	2.19222	13.4009	12.5362	1.359	1.34965	1.08923	12.5252	9.99316	2.97771	1.77754	1.64072	5.92552	4.10137	3.11738	2.13994	1.56879	1.57825	1.88305	2.93717	0.54299	0.720486
2010204K13Rik	3.27507	4.39603	1.32017	1.5681	1.53756	5.5951	4.50313	0.861689	2.61647	2.35239	4.43508	4.44958	1.09093	2.09228	1.94497	14.073	9.90152	8.25322	2.99343	3.18215	3.08801	3.20911e-07	3.14719e-07	0.182525	0.380607
2010300C02Rik	0.0627485	0	0	0	0	0	0	0	0	0	0.0313742	0	0	0	0	0.0245978	0	0	0	0	0	0.0574149	0.140768	0.0252925	1.36933
2010308F09Rik	0	0	0	0	0	0	0	0	0	0	0	0	0	0	0	0	0.128827	0.322566	0	0	0	0	0	0	0
2010310C07Rik	0	0	0	0	0	0	0	0	0	0	0	0	0	0	0	0	0.0538799	0.0449686	0	0	0	0.185825	0.18224	0	0
2010315B03Rik	NA	NA	NA	NA	NA	NA	NA	NA	NA	NA	NA	NA	NA	NA	NA	NA	NA	NA	NA	NA	NA	1.08589	1.57322e-05	2.7213	4.60008
2010320M18Rik	3.69567	7.3949	9.78634	9.33463	15.2003	5.79894	8.18117	8.70257	8.60073	14.8161	4.7473	7.78803	9.24446	8.96768	15.0082	9.25923	11.9374	15.877	6.77467	19.4452	10.5121	12.1046	7.5543	12.0467	7.28265
2200002D01Rik	0	0.293349	0.903603	0.297559	0.583529	1.06172	0.310729	0.184941	0	0.334789	0.53086	0.302039	0.544272	0.14878	0.459159	26.7983	10.2939	3.23367	2.08888	0.549236	0.504441	9.41159	11.1529	0.809313	2.60006
2200002J24Rik	0	0	0	0	0	0	0	0	0	0	0	0	0	0	0	0	0	0	0	0	0	0	0	0	0
2210010C04Rik	0	0	0	0	0	0	0	0	0	0.026182	0	0	0	0	0.013091	0.0175867	0.0178236	0.0297515	0.0171958	0	0	0	0	0	0
2210011C24Rik	0	0.12647	0	0	0.377362	0	0	0	0	0	0	0.063235	0	0	0.188681	0.145428	0	0.0410035	0	0	0.0434955	NA	NA	NA	NA
2210013O21Rik	32.6663	129.406	125.31	78.0113	23.463	26.774	84.1844	70.0354	48.786	24.8998	29.7202	106.795	97.6727	63.3987	24.1814	41.8658	66.1962	78.5318	57.851	75.605	39.3935	0	0	8.92136	18.0621
2210015D19Rik	2.27698	2.21825	2.26667	3.6071	2.54368	2.95978	2.87886	2.866	3.46823	3.62469	2.61838	2.54855	2.56634	3.53767	3.08419	4.67752	4.95644	4.97546	3.68461	4.44342	4.61525	4.68089	3.08728	4.30347	3.24068
2210016F16Rik	2.78974	0.815174	1.32524	2.41172	2.77013	3.77092	2.37455	0.385442	2.00763	3.10756	3.28033	1.59486	0.855341	2.20967	2.93885	0.0292927	0.0527774	0.0462509	0.101837	0.133546	0.0905309	10.3909	11.1513	8.67724	12.5192
2210016L21Rik	18.1515	24.858	24.7872	16.8907	10.6186	15.9319	28.7783	19.7403	10.5182	7.95623	17.0417	26.8181	22.2638	13.7044	9.28741	20.0028	32.219	29.2667	14.1237	20.705	11.6455	11.2175	13.5156	6.24884	11.2988
2210018M11Rik	1.11823	3.68764	3.61859	2.36745	2.22849	2.43914	3.13973	3.13414	1.84142	1.65147	1.77869	3.41369	3.37636	2.10444	1.93998	9.67062	9.32945	11.0629	6.83152	8.60858	8.5085	5.04269	5.09897	3.20114	8.38959
2210019I11Rik	0	0	0	0	0	0	0	0	0	0	0	0	0	0	0	0	0	0	0	0	0	0	0	0	0
2210039B01Rik	0	0.340739	0	0	0	0	0	0	0	0	0	0.17037	0	0	0	0.0884303	0.124092	0.177791	0.053209	0.0332272	0.0561518	0	0	0.5043	0.366152
2210404J11Rik	NA	NA	NA	NA	NA	NA	NA	NA	NA	NA	NA	NA	NA	NA	NA	NA	NA	NA	NA	NA	NA	0.696828	0.528046	3.23909	4.25281
2210404O07Rik	NA	NA	NA	NA	NA	NA	NA	NA	NA	NA	NA	NA	NA	NA	NA	NA	NA	NA	NA	NA	NA	1.60273	1.57181	1.79423	2.0057
2210404O09Rik	0.223635	0.382861	0.639106	0.562704	0.423858	0.186836	0.474574	0.3634	0.0757632	0.209639	0.205235	0.428717	0.501253	0.319234	0.316748	2.887	5.69731	4.90692	2.50649	1.85374	2.95068	0.245026	0.321156	0.269398	2.54215
2210406O10Rik	0.320794	0.437443	0.178981	0.221863	0.435084	0.0989492	0.0923213	0.0689467	0.76886	0.828598	0.209872	0.264882	0.123964	0.495362	0.631841	0.861289	0.35946	0.226108	0.1308	0.277489	0.415003	NA	NA	NA	NA
2210407C18Rik	0	0	0	0	0	0	0	0	0	0	0	0	0	0	0	0	0	0	0	0	0	0	0	0.0519123	0
2210408F21Rik	2.55644	0.414027	0.464473	1.60606	9.28705	2.70537	3.5176	0.628329	4.32938	8.5396	2.6309	1.96581	0.546401	2.96772	8.91333	3.74336	7.83028	6.55262	0.966209	2.04837	8.76356	0.455572	9.1801e-37	14.4309	8.77328
2210408I21Rik	0.168802	0.358117	0.295889	0.189851	0.186356	0.364696	0.464276	0.212624	0.103532	0.0534587	0.266749	0.411197	0.254256	0.146692	0.119907	0.568087	1.0589	0.91763	0.621362	0.654724	0.990218	2.08385e-07	0.104519	0.384957	2.02287
2210409D07Rik	0	0	0	0	0	0	0	0	0	0	0	0	0	0	0	0	0	0	0	0	0	0	0	0.689537	0
2210409E12Rik	0.752167	1.02567	0	0	0	0	1.08644	0.808288	0.200303	0.14632	0.376084	1.05605	0.404144	0.100152	0.07316	1.67084	0.996087	0.498805	0.0960999	0	0	0	0.837798	0	0
2210414B05Rik	0	0	0	0	0	0	0	0	0	0	0	0	0	0	0	0	0	0	0	0	0	0	0	0	0
2210416O15Rik	0.200635	0.205193	0.28525	0.144864	0.136056	0.123775	0.183261	0.175678	0	0.0780599	0.162205	0.194227	0.230464	0.072432	0.107058	0.110652	0.138553	0.0916577	0.0779492	0.0525646	0.0479074	1.55678	0.860465	0.242615	0.310211
2210417A02Rik	0	0	0	0	0	0	0	0	0	0	0	0	0	0	0	0	0	0	0	0	0	0	0	0	0.126504
2210417K05Rik	NA	NA	NA	NA	NA	NA	NA	NA	NA	NA	NA	NA	NA	NA	NA	NA	NA	NA	NA	NA	NA	0	0.990982	0.396986	0.371989
2210420H20Rik	0	0	0	0	0	0	0	0	0	0	0	0	0	0	0	0	0	0	0	0	0	0	0	0	0
2300002M23Rik	0	0	0	0	0	0	0	0	0	0	0	0	0	0	0	0	0	0	0	0	0	0	0	0	0
2300003K06Rik	0	0	0	0	0	0	0	0	0	0	0	0	0	0	0	0	0	0	0	0	0	0	0	0	0
2300005B03Rik	0	0	0	0	0.339991	0	0	0	0.26703	0	0	0	0	0.133515	0.169995	0.131026	0	0	0	0.128004	0.235129	0	0.447842	0	0
2300009A05Rik	6.83888	12.4091	6.02315	33.8711	31.6407	11.2281	9.67901	13.5129	43.8852	44.0313	9.03349	11.0441	9.76802	38.8781	37.836	17.469	11.0433	11.9965	11.1616	17.4885	28.167	37.1339	17.4685	44.3724	20.3309
2310001H17Rik	0	0.171626	1.21051	0.247642	0.69694	0.776459	0.49777	0.324603	0.562581	0.696723	0.38823	0.334698	0.767556	0.405112	0.696832	1.02962	1.8366	1.05853	0.450254	1.00295	0.634362	3.67726	0.92546	2.83152	1.89865
2310001H18Rik	NA	NA	NA	NA	NA	NA	NA	NA	NA	NA	NA	NA	NA	NA	NA	NA	NA	NA	NA	NA	NA	0	0	NA	NA
2310001K24Rik	1.23e-09	4.23e-08	1.4554	13.7277	2.8147	1.46e-09	2.08e-10	2.4695	7.25277	4.82997	1.34333e-09	2.12552e-08	1.96245	10.4902	3.82233	0.270177	0.273446	1.88076e-10	0.411379	1.45287	1.82144	0.517175	2.39175	1.51584	0.865923
2310002D06Rik	0	0	0	0	0	0	0	0	0	0	0	0	0	0	0	0	0	0	0	0	0	0	0	0	0
2310002F09Rik	0	0	0	0	0	0	0	0	0	0	0	0	0	0	0	0.0145036	0	0	0	0	0	NA	NA	NA	NA
2310002J15Rik	NA	NA	NA	NA	NA	NA	NA	NA	NA	NA	NA	NA	NA	NA	NA	NA	NA	NA	NA	NA	NA	0	0.202404	0	0
2310002L09Rik	0	0	0	0	0	0	0	0	0	0	0	0	0	0	0	0	0	0	0	0	0	0	0	2.0875	0
2310003H01Rik	38.5132	14.8154	10.7252	23.377	17.0276	16.4655	14.5836	9.47241	12.1811	11.7846	27.4894	14.6995	10.0988	17.7791	14.4061	5.07071	5.3483	5.03626	2.00788	4.81927	3.23217	7.1488	5.98679	3.86916	2.96232
2310005A03Rik	0	0	0	0	0	0	0	0	0	0	0	0	0	0	0	0	0	0	0	0.0139897	0	0	0	0	0
2310005E17Rik	0	0	0	0	0	0	0.0959081	0	0	0	0	0.047954	0	0	0	0.0347052	0.105518	0.058711	0	0.0339048	0.0311396	0	0	0	0
2310005G13Rik	NA	NA	NA	NA	NA	NA	NA	NA	NA	NA	NA	NA	NA	NA	NA	NA	NA	NA	NA	NA	NA	0	0.0408718	0	0.0152938
2310007B03Rik	0	0.0424754	0	0.0430851	0	0	0.044992	0.0267785	0	0	0	0.0437337	0.0133893	0.0215426	0	0.244694	0.0660954	0.0137711	0.0478099	0.0159053	0	0	0	0	0.0209153
2310007L24Rik	0	0	0	0	0	0	0	0	0	0	0	0	0	0	0	0	0	0	0	0	0.0522668	0.203571	0	0.299484	0
2310008H04Rik	NA	NA	NA	NA	NA	NA	NA	NA	NA	NA	NA	NA	NA	NA	NA	NA	NA	NA	NA	NA	NA	1.6784	2.37826	0.785682	3.25122
2310008H09Rik	NA	NA	NA	NA	NA	NA	NA	NA	NA	NA	NA	NA	NA	NA	NA	NA	NA	NA	NA	NA	NA	4.07642	4.31665	4.93462	5.98918
2310008N11Rik	0	0	0	0	0	0.223419	0	0	0	0	0.11171	0	0	0	0	0	0.383678	0.480331	0.185081	0	1.69841	0.330303	0	0.0973175	0
2310009A05Rik	1.50883	4.32068	4.75321	7.20014	12.5851	7.53965	10.1341	4.86421	10.1254	12.8559	4.52424	7.22739	4.80871	8.66277	12.7205	18.927	28.0536	19.1113	8.67482	22.7664	18.6807	11.9617	10.1129	18.1236	21.7314
2310009B15Rik	18.7098	15.986	18.9009	30.7111	21.6814	13.8071	33.9946	21.6837	21.5696	31.9276	16.2584	24.9903	20.2923	26.1404	26.8045	12.9976	18.9122	12.4861	9.34995	17.9583	17.3267	10.3689	7.62659	7.35058	3.93584
2310010J17Rik	2.47894	0.507048	0	3.08599	6.05179	0.458788	2.41693	0.639335	2.77263	4.34013	1.46886	1.46199	0.319667	2.92931	5.19596	1.94353	3.44701	5.7538	1.52027	4.5993	5.23157	1.97629e-06	4.30649e-07	12.3903	10.2368
2310010M20Rik	NA	NA	NA	NA	NA	NA	NA	NA	NA	NA	NA	NA	NA	NA	NA	NA	NA	NA	NA	NA	NA	0	0	0.728446	0.0221053
2310011J03Rik	57.6035	57.3842	69.9011	55.1703	61.2682	77.4691	48.7438	58.0615	43.7283	55.1684	67.5363	53.064	63.9813	49.4493	58.2183	14.523	13.3417	12.5617	14.7727	14.5542	11.7278	17.7048	20.0158	9.34528	12.5785
2310014F07Rik	NA	NA	NA	NA	NA	NA	NA	NA	NA	NA	NA	NA	NA	NA	NA	NA	NA	NA	NA	NA	NA	2.21451	0.127752	6.77385	0.208829
2310014L17Rik	0.401076	0.527382	0.812248	0.713269	0.174845	0.60974	0.387937	0.480258	0.457745	0.401256	0.505408	0.457659	0.646253	0.585507	0.28805	0.527823	0.250395	0.275476	1.69102	0.692758	0.233775	0.0786305	0.0385566	0.13857	0.0721357
2310015A10Rik	0.580783	0.7281	0.334448	0.641373	0.857567	0.312064	0.81183	0.350311	0.419088	0.656018	0.446423	0.769965	0.34238	0.530231	0.756792	0.55816	0.647554	0.819999	0.186705	0.717483	0.896195	1.10572	1.05917	1.11009	1.73601
2310015B20Rik	0.363596	0	0	0	0	0	0.196944	0	0	0	0.181798	0.098472	0	0	0	0	0	0.120561	0	0	0.127888	0	0	0.293115	0.183105
2310015D24Rik	0	0	0	0	0	0	0	0	0	0	0	0	0	0	0	0	0	0.0106265	0	0	0	0.263874	0.0862609	0.232523	0
2310016D03Rik	0	0	0	0	0	0	0	0	0	0	0	0	0	0	0	0	0	0	0	0	0	0	0	0	0
2310020H05Rik	0	0	0	0	0	0	0	0	0	0	0	0	0	0	0	0	0	0	0	0	0	0	0	0.272673	0
2310022A10Rik	18.5015	13.0156	16.5459	12.3888	7.39739	16.659	10.5042	13.745	9.28438	6.71978	17.5802	11.7599	15.1455	10.8366	7.05858	9.6563	8.32764	7.95503	8.07528	7.94552	5.37554	5.735	5.23978	2.97468	3.82386
2310022B05Rik	100.706	70.1523	48.2849	27.1789	28.3597	61.7641	65.5817	35.2842	19.1174	24.8396	81.2351	67.867	41.7846	23.1482	26.5997	33.6995	38.7845	33.5684	15.7449	25.8292	16.5674	7.15246	12.6713	5.09379	11.4863
2310030A07Rik	0	0	0	0	0	0	0	0	0	0	0	0	0	0	0	0	0	0	0	0	0	0	0	0.0862953	0
2310030G06Rik	0.837568	0	0	0.0868889	0.0851968	1.08509	0.680509	0.108007	0.0669137	0.0977602	0.961329	0.340255	0.0540035	0.0769013	0.0914785	0.164166	0.166377	0.194404	0.0321033	0.0320759	0.206219	0.918803	0.563171	1.35042	1.22321
2310033P09Rik	9.809	11.4894	14.5261	8.08846	10.9157	8.22362	7.90152	8.48675	6.42991	5.28414	9.01631	9.69546	11.5064	7.25919	8.09992	3.84518	2.99768	3.86403	4.69161	4.01336	2.53599	9.4268	11.9507	5.00137	10.7662
2310034C09Rik	0	0	0	0	0	0	0	0	0	0	0	0	0	0	0	0	0	0	0	0	0	0	0	0	0
2310034G01Rik	0.148853	1.52234	0.468928	2.47071	1.96836	0.550981	2.0963	1.24768	0.356759	1.65053	0.349917	1.80932	0.858304	1.41373	1.80944	0.700215	2.18808	3.25753	4.39318	5.07349	2.30368	0.203918	0.799934	0.539994	1.19939
2310034O05Rik	0	0	0	0	0	0	0	0	0	0	0	0	0	0	0	0	0	0	0	0	0	0.263988	0	0	0
2310035C23Rik	0.728801	1.12885	1.21108	0.797622	0.499964	1.33316	1.17731	0.983536	0.88014	0.702286	1.03098	1.15308	1.09731	0.838881	0.601125	6.09233	5.53578	6.21071	6.58486	5.70508	4.03561	2.1867	0.000264853	1.26364	3.95154
2310036O22Rik	110.309	110.101	130.032	78.2559	63.3649	216.433	140.1	104.283	83.0794	59.5092	163.371	125.1	117.157	80.6676	61.437	181.487	138.836	110.064	120.546	119.572	69.2432	42.7698	50.2654	24.7528	41.1704
2310039H08Rik	28.8747	44.8428	43.7971	54.5203	72.2623	16.1168	37.9832	28.7635	29.7811	55.1897	22.4958	41.413	36.2803	42.1507	63.726	13.4152	20.9401	14.5387	8.84225	21.0629	19.0226	29.7179	25.4501	42.4291	15.0028
2310039L15Rik	0.0220505	0	0	0.0754878	0	0	0	0	0	0	0.0110253	0	0	0.0377439	0	0.0350079	0	0.0488042	0.049443	0.040534	0.0116338	0	0	0.119989	0.124926
2310040G24Rik	0	0	0	0	0.309741	0	0.136063	0.161964	0.200683	0.586398	0	0.0680315	0.080982	0.100342	0.44807	0	0.362908	0.25329	0	0.192401	2.91127	7.81579e-06	0.000595044	3.84075	1.76326
2310042D19Rik	NA	NA	NA	NA	NA	NA	NA	NA	NA	NA	NA	NA	NA	NA	NA	NA	NA	NA	NA	NA	NA	7.05228	0.289515	4.02682	0.180539
2310042E22Rik	NA	NA	NA	NA	NA	NA	NA	NA	NA	NA	NA	NA	NA	NA	NA	NA	NA	NA	NA	NA	NA	0	0	0	0
2310043L19Rik	0	0	0	0	0	0	0	0	0	0	0	0	0	0	0	0.068979	0	0.058346	0	0	0	0	0	0	0
2310043O21Rik	0	0	0	0	0.212029	0	0	0	0	0.243296	0	0	0	0	0.227662	0	0	0	0	0	0	0	0	0	0
2310044G17Rik	NA	NA	NA	NA	NA	NA	NA	NA	NA	NA	NA	NA	NA	NA	NA	NA	NA	NA	NA	NA	NA	0.410573	0.960055	7.51205	5.87313
2310045N01Rik	65.1901	60.6099	86.2033	78.1022	107.169	46.7166	75.02	78.8285	57.166	83.0065	55.9534	67.8149	82.5159	67.6341	95.0877	33.3848	51.7984	49.8543	52.2452	66.6588	37.2892	34.2436	40.0638	27.7807	39.13
2310047M10Rik	25.3541	23.426	17.997	16.7634	24.9598	7.85425	20.1282	16.1019	10.8667	23.0203	16.6042	21.7771	17.0495	13.815	23.9901	4.5429	8.27875	5.98944	4.60876	4.95904	9.56847	10.2254	11.0529	5.35107	6.3841
2310050B05Rik	NA	NA	NA	NA	NA	NA	NA	NA	NA	NA	NA	NA	NA	NA	NA	NA	NA	NA	NA	NA	NA	0	0	4.51261	0
2310050C09Rik	0	0	0	0	0	0	0	0	0	0	0	0	0	0	0	0	0	0	0	0	0	0	0	0	0
2310057J18Rik	0	0	0	0	0	0	0	0	0	0	0	0	0	0	0	0	0	0	0	0	0	0	0	0	0
2310057M21Rik	1.12467	2.30043	3.22504	2.69244	2.068	4.12293	2.06184	2.45435	3.21387	2.27198	2.6238	2.18113	2.83969	2.95316	2.16999	5.7653	3.86667	3.65744	4.6092	3.97576	3.51458	1.7805	2.15357	1.30768	2.74475
2310057N15Rik	0	0	0	0	0	0	0	0	0	0	0	0	0	0	0	0	0	0	0	0	0	0	0	0	0
2310061I04Rik	46.9104	20.1688	20.7087	98.8092	87.666	45.9725	15.5001	21.1021	77.4346	86.1461	46.4415	17.8345	20.9054	88.1219	86.906	26.8765	16.1698	12.5215	13.7667	21.6609	30.1071	49.711	11.7365	78.4755	16.3127
2310061J03Rik	3.51127	6.95838	4.79994	6.97259	11.3925	0.988529	6.6766	7.69528	5.25893	13.5875	2.2499	6.81749	6.24761	6.11576	12.49	1.09224	4.31151	4.76439	2.42169	4.75847	3.63616	8.01974	6.43231	4.40685	6.37095
2310061N02Rik	0	0	0	0	0	0	0	0	0	0	0	0	0	0	0	0	0	0	0	0	0	0	0	0	0
2310065F04Rik	0	0	0	0	0	0	0	0	0	0	0	0	0	0	0	0	0	0	0	0	0	0	0	0.264238	0.0173754
2310067B10Rik	37.9767	34.961	17.2434	24.0936	35.7873	13.1135	24.8012	16.1915	19.236	30.3908	25.5451	29.8811	16.7174	21.6648	33.0891	7.063	9.03961	8.821	2.42719	7.88683	10.0262	22.9619	13.7751	17.9697	8.05018
2310068J16Rik	0.379228	1.91957	1.47034	2.05856	3.14692	0.362527	1.07446	1.82454	2.08625	3.0955	0.370878	1.49701	1.64744	2.0724	3.12121	0.980809	1.70387	0.871835	1.6625	1.0998	1.48403	1.32714	0.2534	0.770495	0.400667
2310069B03Rik	0	0	0	0	0.0543569	0	0.028945	0.0344552	0	0.0623726	0	0.0144725	0.0172276	0	0.0583647	0	0	0.017719	0	0	0.0187959	0.293236	0	0.603113	0.0269112
2310069G16Rik	0	0	0	0	0	0	0	0	0	0	0	0	0	0	0	0	0	0	0	0.050596	0	0	0	0	0.133067
2310079G19Rik	0	0	0	0	0	0	0	0	0	0	0	0	0	0	0	0	0	0	0	0	0	0	0	0	0
2410002F23Rik	19.829	27.7561	46.5998	27.1653	7.85906	40.5902	17.2431	27.3043	19.4161	7.29144	30.2096	22.4996	36.952	23.2907	7.57525	27.8336	16.3967	18.2492	45.3114	30.1787	9.49425	7.71512	9.50715	7.61814	7.4124
2410002O22Rik	NA	NA	NA	NA	NA	NA	NA	NA	NA	NA	NA	NA	NA	NA	NA	NA	NA	NA	NA	NA	NA	2.69981e-07	2.40481	NA	NA
2410003L11Rik	0	0	0	0	0	0	0	0	0	0	0	0	0	0	0	0	0	0	0	0	0.149867	0	0	0.0858724	0.107287
2410004B18Rik	2.5934	4.15145	4.14417	3.86012	2.5233	8.45173	3.78666	3.70779	3.15287	3.61924	5.52257	3.96905	3.92598	3.5065	3.07127	13.6582	11.7368	11.2537	15.2562	13.3648	9.85552	8.50027	5.60802	3.68143	8.06329
2410004I01Rik	0	0	0	0.120248	0	0	0.188355	0.149474	0	0.0676465	0	0.0941775	0.074737	0.060124	0.0338232	0	0	0	0	0.0443907	0	0	0.155804	0.0467221	0.0583734
2410004N09Rik	12.1428	13.1948	19.525	5.37321	2.08513	13.6947	15.2098	9.54193	2.72839	2.39209	12.9187	14.2023	14.5335	4.0508	2.23861	27.3702	23.6686	26.4225	17.1625	27.6503	9.20933	11.3979	15.2427	15.9071	5.92396
2410004P03Rik	0	0	0	0	0	0	0	0	0	0.0326385	0	0	0	0	0.0163193	0.0219235	0.0444465	0	0	0.0214179	0.0393499	0	0.00011288	0	0.084515
2410006H16Rik	96.7093	161.846	143.808	166.274	46.7783	208.399	343.42	293.897	132.912	53.479	152.554	252.633	218.852	149.593	50.1287	131.693	247.634	299.701	116.129	262.75	77.7841	22.1738	49.608	30.122	21.286
2410007B07Rik	0	0	0	0	0	0	0	0	0	0	0	0	0	0	0	0.0412087	0	0.0348565	0	0	0	0	0	0	0
2410012E07Rik	0	0	0	0	0	0	0	0	0	0	0	0	0	0	0	0.192132	0.389441	0.150014	0.0289017	0.0577542	0	0	0	0	0
2410012M07Rik	0	0	0	0	0	0	0	0	0	0	0	0	0	0	0	0	0	0	0	0	0	0	0	0	0
2410015M20Rik	50.0118	62.4423	66.7644	151.718	245.853	50.5135	53.2382	56.1507	94.782	153.483	50.2627	57.8402	61.4575	123.25	199.668	42.4257	57.3507	59.217	62.8892	76.7923	112.074	215.019	71.8443	156.627	42.5058
2410016O06Rik	16.277	15.7334	19.9481	11.7062	6.9778	20.4712	10.5314	14.7347	12.5497	4.50085	18.3741	13.1324	17.3414	12.128	5.73933	7.71726	4.75724	4.01081	9.27268	6.10915	2.78403	2.72905	2.56715	1.14529	1.88061
2410017I17Rik	0	0	0	0	0	0.0307782	0	0	0.0531434	0	0.0153891	0	0	0.0265717	0	0	0	0	0	0	0	0	0.10439	0.0268128	0
2410018L13Rik	1.58995	2.47605	1.25219	0.674756	0.367564	0.769089	1.97685	1.23484	0.346423	0.316325	1.17952	2.22645	1.24351	0.51059	0.341944	1.51568	1.96678	1.60554	1.17728	1.38385	0.673623	0.644256	1.11784	0.189349	0.982665
2410018M08Rik	NA	NA	NA	NA	NA	NA	NA	NA	NA	NA	NA	NA	NA	NA	NA	NA	NA	NA	NA	NA	NA	55.5394	25.3836	32.773	16.8672
2410021H03Rik	0.155787	0	0	0	0	0.144162	0.0843829	0	0	0	0.149975	0.0421914	0	0	0	0.854972	0.680814	0.929803	0.507552	0.477288	0.10959	0	0	0	0.0784537
2410057H14Rik	NA	NA	NA	NA	NA	NA	NA	NA	NA	NA	NA	NA	NA	NA	NA	NA	NA	NA	NA	NA	NA	0	0	0.0955208	0
2410066E13Rik	NA	NA	NA	NA	NA	NA	NA	NA	NA	NA	NA	NA	NA	NA	NA	NA	NA	NA	NA	NA	NA	11.2455	14.6011	2.21067	24.5087
2410076I21Rik	NA	NA	NA	NA	NA	NA	NA	NA	NA	NA	NA	NA	NA	NA	NA	NA	NA	NA	NA	NA	NA	0	0.516186	0.412852	0.386856
2410088K16Rik	0	0	0	0	0	0	0	0	0	0	0	0	0	0	0	0	0	0	0	0	0	0	0	0	0
2410089E03Rik	1.28753	2.20906	1.75229	0.922668	0.827155	1.20712	2.45923	1.23977	0.805294	0.578376	1.24733	2.33414	1.49603	0.863981	0.702766	5.96696	7.11413	6.20152	2.12334	3.82135	2.43116	1.13954	1.66492	0.474587	2.2779
2410114N07Rik	0	0	0	0	0	0	0	0	0	0.00848976	0	0	0	0	0.00424488	0	0	0.00385887	0	0.0044569	0	0	0	0	0
2410124H12Rik	0	0	0	0	0	0	0	0	0	0	0	0	0	0	0	0	0	0	0	0	0	0	0	0	0
2410127L17Rik	2.16212	2.8699	3.91286	3.961	3.46272	3.57586	2.59142	2.69915	2.94014	2.79208	2.86899	2.73066	3.306	3.45057	3.1274	20.5399	15.4617	13.7892	21.0179	14.5696	14.0933	6.31154	2.66159	13.9162	9.79952
2410131K14Rik	9.80176	9.44746	16.6239	10.5341	7.56736	8.93981	9.12871	14.231	7.74617	5.32931	9.37078	9.28809	15.4275	9.14014	6.44834	4.46431	5.57502	6.40658	14.1899	7.27791	6.69675	6.87018	4.17542	4.76094	3.94179
2410137F16Rik	NA	NA	NA	NA	NA	NA	NA	NA	NA	NA	NA	NA	NA	NA	NA	NA	NA	NA	NA	NA	NA	0	0	0.0222236	0
2410137M14Rik	0	0	0	0	0	0	0	0	0	0	0	0	0	0	0	0.0515554	0.05225	0	0.0504094	0	0	0.041588	0.0797584	0.0530116	0
2410141K09Rik	0	0	0	0	0	0	0	0	0	0	0	0	0	0	0	0	0.111025	0.0223994	0.106703	0.00862359	0.0475217	0	0	0	0
2500002B13Rik	0.72835	0.740652	0.951183	0.597259	8.31696	0.832311	3.59166	1.1941	0.774422	6.45609	0.780331	2.16616	1.07264	0.68584	7.38652	4.06517	4.75719	0.71584	0.930617	1.626	10.7826	NA	NA	NA	NA
2500004C02Rik	0.269659	1.15479	0.348076	0.0880006	0.274088	0.284969	0.631762	0.235325	0.220557	0.359435	0.277314	0.893276	0.2917	0.154279	0.316761	1.6805	3.35778	3.51529	1.34674	1.92141	2.14123	0.352059	0.138106	1.06493	1.55774
2510002D24Rik	2.79086	2.50828	1.86496	2.23722	4.12922	3.78725	3.43564	1.85398	2.33098	4.02247	3.28905	2.97196	1.85947	2.2841	4.07585	0.762507	0.663583	0.616926	0.162078	0.2672	0.386704	11.0168	9.80907	8.82902	6.83566
2510003D18Rik	NA	NA	NA	NA	NA	NA	NA	NA	NA	NA	NA	NA	NA	NA	NA	NA	NA	NA	NA	NA	NA	0	0	0	0
2510003E04Rik	11.6925	18.6232	22.3825	14.0387	16.4559	12.2035	23.4851	21.8258	12.3426	15.1687	11.948	21.0541	22.1042	13.1906	15.8123	9.60285	15.4284	16.1308	10.947	14.7107	13.4031	8.04822	10.9366	5.37743	19.634
2510009E07Rik	0.946623	7.69122	3.92094	3.61893	1.99712	0.519101	4.68115	3.51517	2.81497	1.53457	0.732862	6.18619	3.71806	3.21695	1.76585	0.858985	3.13401	4.6152	1.74026	3.68565	6.09188	3.15201	6.18239	1.9926	11.6707
2510039O18Rik	45.6238	44.4081	66.1189	39.2274	31.0438	45.0847	37.6555	57.0587	28.079	34.3666	45.3543	41.0318	61.5888	33.6532	32.7052	22.6594	18.0027	19.138	33.6359	22.3806	21.1967	20.7743	17.5489	8.5986	13.0128
2510049J12Rik	NA	NA	NA	NA	NA	NA	NA	NA	NA	NA	NA	NA	NA	NA	NA	NA	NA	NA	NA	NA	NA	0.102189	0.100217	0.0300181	0.0750077
2600006L11Rik	NA	NA	NA	NA	NA	NA	NA	NA	NA	NA	NA	NA	NA	NA	NA	NA	NA	NA	NA	NA	NA	0	0	0.61181	1.14657
2610001J05Rik	5.21989	5.61651	3.99682	3.1588	4.31408	9.10725	9.98418	5.50418	5.25618	4.25213	7.16357	7.80035	4.7505	4.20749	4.2831	35.8729	34.196	23.3118	8.00297	19.2824	15.912	5.14681	7.60782	4.05462	10.3779
2610002J02Rik	31.7265	23.4516	14.2224	9.08432	9.72797	32.1099	29.0922	16.6421	9.13387	12.6737	31.9182	26.2719	15.4322	9.10909	11.2008	14.6282	18.3047	17.681	5.8695	14.2053	13.1774	5.43533	4.31601	10.8404	16.2037
2610002M06Rik	0.524442	1.08848	0.761278	0.144014	0.502078	1.45592	1.07778	0.467433	0.357365	0.342069	0.990181	1.08313	0.614356	0.25069	0.422073	3.67028	6.32415	6.70002	2.30575	3.19576	3.09246	0.846887	1.67147	0.596868	3.54213
2610005L07Rik	0.724046	1.7893	1.63521	1.43335	0.798925	0.377475	1.55248	1.05266	1.02616	0.786379	0.55076	1.67089	1.34394	1.22975	0.792652	1.83869	3.61666	5.88101	4.46368	3.29746	4.07914	3.73092	2.80626	2.65509	3.00357
2610008E11Rik	0.972095	3.18136	3.7202	1.29977	0.900913	0.519742	2.51569	1.74104	1.27709	0.453848	0.745919	2.84852	2.73062	1.28843	0.677381	3.75986	7.34639	10.3932	3.82532	5.91509	4.56648	1.33419	1.57013	2.09847	4.754
2610015P09Rik	0.126415	1.18943	0.42479	0.236055	0.565787	0.116981	0.547784	0.244524	0.242384	0.250835	0.121698	0.868607	0.334657	0.23922	0.408311	1.5263	2.94306	3.0599	1.21134	1.91713	2.43663	0.97156	0.782667	2.35412	2.11357
2610016A17Rik	0	0	0	0	0	0	0	0	0	0	0	0	0	0	0	0	0	0	0	0	0	6.59743	15.097	5.05984	53.6529
2610017I09Rik	NA	NA	NA	NA	NA	NA	NA	NA	NA	NA	NA	NA	NA	NA	NA	NA	NA	NA	NA	NA	NA	0	0	0	0
2610018G03Rik	NA	NA	NA	NA	NA	NA	NA	NA	NA	NA	NA	NA	NA	NA	NA	NA	NA	NA	NA	NA	NA	0.132611	0.195078	0.077922	3.7968
2610019E17Rik	NA	NA	NA	NA	NA	NA	NA	NA	NA	NA	NA	NA	NA	NA	NA	NA	NA	NA	NA	NA	NA	3.70056	7.25831	7.3371	4.12506
2610019F03Rik	NA	NA	NA	NA	NA	NA	NA	NA	NA	NA	NA	NA	NA	NA	NA	NA	NA	NA	NA	NA	NA	12.7805	21.9603	4.26634	35.044
2610020C07Rik	0	0.214149	0.233699	0.0592069	0.128244	0.198738	0.193387	0.204518	0.0425289	0.0334747	0.099369	0.203768	0.219109	0.0508679	0.0808593	0.716788	0.795096	0.681917	0.758809	0.888107	0.794935	0.198038	0.279203	0.200174	0.412748
2610020H08Rik	0.096391	0.542193	1.06296	5.04436	1.39782	0.305715	0.615251	0.482952	8.21477	1.52295	0.201053	0.578722	0.772956	6.62957	1.46039	2.23651	2.63822	3.13336	1.88919	6.19884	6.32146	0.226501	0.547513	3.32636	4.8484
2610027K06Rik	0	0.133205	0	0	0	0	0.119316	0	0	0	0	0.12626	0	0	0	1.17671e-229	0	0.0723376	0	0.0167236	0.0610891	NA	NA	NA	NA
2610028E06Rik	0	0	0	0	0	0	0	0	0	0	0	0	0	0	0	0	0	0	0	0	0	0	0	0	0
2610028H24Rik	5.67e-07	2.04e-07	0.192941	3.67e-07	1.06e-07	1.84e-07	0.0832812	0.106873	2e-07	6.62e-08	3.75472e-07	0.0416407	0.149907	2.83523e-07	8.59684e-08	8.03326e-08	6.6359e-08	8.54129e-08	6.82601e-08	8.09292e-08	1.92671e-07	2.04329e-08	6.37274e-08	0.0631103	0.035217
2610034B18Rik	36.6224	29.1461	14.2945	2.68768	9.64801	31.8984	38.6982	19.9606	2.03472	6.22729	34.2604	33.9222	17.1275	2.3612	7.93765	20.3121	18.5446	15.0698	7.87692	7.68522	5.76104	5.48262	7.59255	3.38067	8.24843
2610034M16Rik	0	0	0	0	0	0	0	0	0	0	0	0	0	0	0	0	0	0	0	0	0	0	0.0294792	0	0
2610035D17Rik	0.634628	35.4811	17.3824	1.37158	0.215179	0.685148	7.36196	2.42102	0.126752	0.0925915	0.659888	21.4215	9.90171	0.749166	0.153885	0.476824	0.735377	1.45547	0.831097	1.2152	0.427835	2.3942	2.91721	1.57746	2.37033
2610035F20Rik	0.183997	0.0940881	0.386426	0	0	0	0.0996626	0.355905	0.220494	0.10738	0.0919985	0.0968753	0.371165	0.110247	0.05369	0	0	0	0	0	0	0	0	0	0
2610037D02Rik	0	0	0.00532846	0	0	0	0	0	0	0.00493555	0	0	0.00266423	0	0.00246778	0.00994575	0.0115197	0.0252379	0.00243117	0	0	0.03482	0	0.00340889	0.0276834
2610044O15Rik8	0.111896	0.789049	1.41736	0.348242	0.199185	0.258866	0.816412	0.722435	0.839775	0.310186	0.185381	0.802731	1.0699	0.594009	0.254686	3.00012	4.58127	4.64002	3.87397	3.74567	2.2994	0.700114	0.702209	1.02366	3.67491
2610100L16Rik	0	0	0	0	0	0	0	0	0	0	0	0	0	0	0	0	0	0	0	0	0	0	0	0	0
2610203C20Rik	5.45704	8.31531	2.61521	1.10182	0.856843	6.40547	15.5727	3.6602	0.438891	0.705337	5.93126	11.944	3.1377	0.770355	0.78109	46.3874	35.4884	44.5073	22.3061	4.5584	10.4988	0.100511	0.492857	1.07766	7.19311
2610203C22Rik	0	0.170825	0	0.18077	0.0867577	0.23185	0.0452366	0	0.149414	0.46648	0.115925	0.108031	0	0.165092	0.276619	0	0.202214	0.147703	0	0.0332158	0.622681	0.380375	1.06718	0.637096	3.14944
2610204G22Rik	NA	NA	NA	NA	NA	NA	NA	NA	NA	NA	NA	NA	NA	NA	NA	NA	NA	NA	NA	NA	NA	0.751719	3.65544e-07	0.989723	0.888478
2610206C17Rik	0.402249	0.0587695	0	0.0596131	0.233809	0.106352	0.0622515	0	0.137725	0.134143	0.2543	0.0605105	0	0.098669	0.183976	0.135158	0.114149	0.0762156	0.0881023	0.0440136	0.20212	1.97068	1.70074	0.0926501	0.202571
2610301B20Rik	1.27192	2.22997	2.43276	2.1206	1.29379	2.26994	2.82959	1.78663	1.05244	1.35203	1.77093	2.52978	2.10969	1.58652	1.32291	6.12567	11.4599	9.91096	6.04175	9.4811	6.6627	1.62044	1.46693	2.96624	4.80401
2610301G19Rik	NA	NA	NA	NA	NA	NA	NA	NA	NA	NA	NA	NA	NA	NA	NA	NA	NA	NA	NA	NA	NA	9.40996	10.2983	4.45595	9.63306
2610305D13Rik	0.41807	0.823695	0.613325	0.344412	0.391146	0.654269	0.936436	0.397202	0.294704	0.279864	0.536169	0.880065	0.505263	0.319558	0.335505	9.58013	14.2155	13.1784	7.01436	4.89796	5.15874	0.742392	0.923756	2.48781	3.3906
2610306M01Rik	3.666	4.8205	3.29969	4.88969	6.6057	3.00472	4.7657	2.29618	4.43502	5.50147	3.33536	4.7931	2.79793	4.66235	6.05358	1.72451	5.1184	3.88982	1.04383	2.8079	3.49993	3.73316	2.81625	4.85524	2.79565
2610307P16Rik	0	0	0	0	0	0	0	0	0	0	0	0	0	0	0	0.0924463	0.195326	0.279762	0.0443504	0.0301022	0.0691231	4.61046e-07	3.332e-05	0.0316831	0.118767
2610316D01Rik	0	0	0	0	0	0	0.0655826	0.0780673	0	0.141322	0	0.0327913	0.0390337	0	0.070661	0.0474634	0.0481028	0.080294	0	0	0.042587	0	0	0	0
2610318N02Rik	0	0.167448	0	0	0	0	0.177369	0	0	0	0	0.172408	0	0	0	1.05901	0.617948	0.108578	0.15689	0.0627023	0.0287942	0	0.110092	0	0.123679
2610507B11Rik	28.7391	22.2036	20.5654	50.3777	55.1247	25.1884	25.858	33.8034	73.7588	61.5911	26.9638	24.0308	27.1844	62.0682	58.3579	24.4042	20.1614	19.7469	23.4727	32.2339	33.3227	36.9241	24.5938	22.0877	52.9213
2610507I01Rik	0.386288	0.201189	0.135212	0.0742098	0.0654882	0	0.0174362	0.269821	0.102869	0.056359	0.193144	0.109313	0.202516	0.0885394	0.0609236	1.2703	2.82712	3.42237	1.58713	2.09424	2.38082	4.81685	2.64264	7.71354	5.82549
2610524H06Rik	5.27944	18.2373	9.52112	2.67468	2.59607	4.59958	14.8087	8.82971	1.42467	2.09463	4.93951	16.523	9.17541	2.04968	2.34535	9.7998	10.5273	13.0876	6.55309	10.0044	6.50903	0.241193	0.630771	0.354671	2.12696
2610528A11Rik	0.31496	0	0	0.816845	21.1448	0.145728	0.0852998	0	0.251623	15.3481	0.230344	0.0426499	0	0.534234	18.2464	0.370399	0.750777	0.313302	0.905413	4.34227	104.965	0	0.211547	0.698244	0.555144
2610528J11Rik	0	0	0	0	0	0	0	0	0	0	0	0	0	0	0	0	0	0	0	0	0	0	0	0	0
2700029M09Rik	3.46335	7.03862	5.68837	5.15897	3.79388	8.05333	5.33921	3.54998	4.1858	2.07302	5.75834	6.18891	4.61918	4.67239	2.93345	32.7751	30.6588	21.2154	22.4139	24.6563	16.0548	6.33162	5.01532	6.24619	9.79393
2700038G22Rik	3.90989	2.4806	2.4873	0.440296	0.816528	5.3533	1.75514	1.67383	1.68543	0.309622	4.63159	2.11787	2.08056	1.06286	0.563075	9.57289	2.52301	1.39526	6.61	4.59208	1.89262	0.311462	0.237492	0.363934	0.229007
2700046A07Rik	0	0	0	0	0	0	0	0	0	0	0	0	0	0	0	0	0	0	0	0	0	0	0	0	0.0226984
2700046G09Rik	0.484025	1.3613	0.762405	0.753187	1.16932	0.223952	1.5075	1.56042	0.676707	0.741496	0.353988	1.4344	1.16141	0.714947	0.955408	0.711526	2.25949	1.64505	0.695711	1.59877	2.1068	1.32788	1.70921	1.90222	2.74222
2700049A03Rik	0.359748	1.15185	1.01737	0.519235	0.669644	0.564487	0.506986	0.699531	0.629701	0.287495	0.462118	0.829418	0.858451	0.574468	0.478569	2.32381	2.36755	2.05377	1.30099	2.26423	1.42843	0.266823	0.875837	0.391427	1.18298
2700050L05Rik	NA	NA	NA	NA	NA	NA	NA	NA	NA	NA	NA	NA	NA	NA	NA	NA	NA	NA	NA	NA	NA	2.16187	1.93778	1.73393	2.51602
2700054A10Rik	0.499448	0.247991	0.114009	0.2604	0.0957116	0.562652	0.408147	0.147011	0.0693893	0.0320309	0.53105	0.328069	0.13051	0.164895	0.0638713	0.0590282	0.0781666	0.0280965	0.0496999	0.0868132	0.0845703	2.37922e-05	2.38903e-05	0.0800628	0.108548
2700060E02Rik	19.5509	48.2664	40.3906	43.8626	22.5849	51.1784	50.1459	38.6191	42.6462	24.07	35.3646	49.2062	39.5048	43.2544	23.3274	68.4927	77.6114	84.2553	64.3974	96.6119	64.498	19.5747	25.5607	32.3255	49.2297
2700062C07Rik	5.66977	10.4159	8.5999	8.06023	9.07808	9.1331	7.33642	5.88971	5.0329	5.82113	7.40144	8.87616	7.24481	6.54657	7.44961	17.0398	17.3945	15.3531	10.7049	13.7115	10.5621	4.17395	4.65802	6.77143	9.94058
2700069I18Rik	0.150398	0	0	0	0	0	0.0814638	0.0323239	0	0	0.075199	0.0407319	0.016162	0	0	1.12018	3.70457	3.042	1.09528	2.27509	0.502547	0.207462	0.203459	0.427311	0
2700070H01Rik	0.0563836	0	0	0	0	0	0.0324492	0	0	0	0.0281918	0.0162246	0	0	0	0.00276284	0.0298673	0.00545288	0.0216114	0.00269912	0	0	0	0.00284087	0
2700081L22Rik	NA	NA	NA	NA	NA	NA	NA	NA	NA	NA	NA	NA	NA	NA	NA	NA	NA	NA	NA	NA	NA	0.281938	0	0	0
2700081O15Rik	15.6817	33.1444	26.3132	21.1599	13.0771	8.7691	17.5196	19.5601	17.0938	13.4944	12.2254	25.332	22.9367	19.1269	13.2858	9.30645	13.3049	20.0608	15.1381	17.0702	14.4029	16.0744	16.1311	3.57064	9.79147
2700086A05Rik	NA	NA	NA	NA	NA	NA	NA	NA	NA	NA	NA	NA	NA	NA	NA	NA	NA	NA	NA	NA	NA	1.32135	2.03633	0.111063	0.277518
2700089E24Rik	4.14487	7.66698	8.03041	9.71553	13.7412	4.6713	8.99862	6.23304	9.84142	13.6337	4.40808	8.3328	7.13173	9.77848	13.6875	48.5566	72.8689	77.0226	42.5515	57.5483	109.247	0	0	48.1522	75.7355
2700089I24Rik	0	0	0	0	0	0	0	0	0	0	0	0	0	0	0	0	0	0.00177626	0	0.00512885	0.0188422	0	0	0	0
2700090O03Rik	NA	NA	NA	NA	NA	NA	NA	NA	NA	NA	NA	NA	NA	NA	NA	NA	NA	NA	NA	NA	NA	0.310541	0	NA	NA
2700094K13Rik	102.731	70.8988	43.1602	10.8209	23.2372	108.381	53.1301	25.6046	17.2518	15.379	105.556	62.0144	34.3824	14.0364	19.3081	63.8826	52.7987	22.6333	9.18871	15.6285	6.50112	9.00323e-05	14.5336	10.1083	7.10737
2700097O09Rik	0.241215	0.93747	1.51984	2.40235	1.61942	0.669664	0.339713	0.481601	1.77298	1.63302	0.455439	0.638591	1.00072	2.08766	1.62622	4.63983	3.65619	3.22068	5.13464	4.36966	6.56008	2.54562e-05	1.55679	3.38395	2.74545
2700099C18Rik	0.365294	1.5048	0.63932	0	0.041286	0.413153	0.527635	0.112029	0.100333	0.260558	0.389224	1.01622	0.375675	0.0501665	0.150922	5.75827	5.56047	2.17311	1.19095	1.51892	0.941006	0.333949	0	0.122914	0.294071
2810001G20Rik	0.623628	5.74014	3.92919	3.62291	0.507479	2.5392	2.02675	2.57341	4.0854	0.873471	1.58141	3.88345	3.2513	3.85415	0.690475	15.1569	15.5593	9.30518	7.93585	15.7626	7.85271	0.683702	2.68204	2.01096	2.13558
2810002D19Rik	0.340148	0.695749	1.00012	1.69376	0.415195	0.62953	0.921214	0.482496	0.760889	0.277912	0.484839	0.808481	0.741308	1.22732	0.346554	3.68018	3.72976	2.63919	2.29462	2.44898	4.18742	1.30629	0.823551	0.987164	2.26112
2810004N23Rik	6.34714	12.3033	17.8252	21.2082	16.9664	16.4594	13.1922	15.2752	27.0047	18.65	11.4033	12.7477	16.5502	24.1064	17.8082	40.6199	24.3953	17.5708	33.6633	37.2524	21.0788	5.56695	6.25365	5.91999	11.2245
2810006K23Rik	2.07147	2.20555	2.2365	4.79725	4.45725	4.08227	2.39187	3.62252	3.94059	5.59478	3.07687	2.29871	2.92951	4.36892	5.02602	5.6957	6.7685	7.13499	4.09577	7.33662	8.13763	3.00347	2.1215	4.53448	6.90166
2810007J24Rik	0	0	0	0	0	0	0	0	0	0	0	0	0	0	0	0	0	0	0	0	0	0	0	0	0
2810008D09Rik	4.6094	8.30581	11.5245	5.00947	3.5723	6.90594	3.32894	5.23637	2.80569	4.99576	5.75767	5.81738	8.38044	3.90758	4.28403	12.7344	13.4292	11.2081	19.0977	16.3074	10.8085	14.7187	4.12421	12.9172	8.62187
2810008M24Rik	NA	NA	NA	NA	NA	NA	NA	NA	NA	NA	NA	NA	NA	NA	NA	NA	NA	NA	NA	NA	NA	5.0297	5.49637	NA	NA
2810011L19Rik	NA	NA	NA	NA	NA	NA	NA	NA	NA	NA	NA	NA	NA	NA	NA	NA	NA	NA	NA	NA	NA	0	0	0	0
2810013P06Rik	0.524338	1.43	2.00219	1.53294	2.03644	0.48521	1.39423	1.13716	0.990118	1.83601	0.504774	1.41212	1.56967	1.26153	1.93623	3.41949	5.96531	6.52763	2.75883	6.44395	5.16393	5.55878	3.78399	8.47317	6.48133
2810021J22Rik	0.296754	0.38174	0.564809	0.509878	0.320722	0.377588	0.482215	0.514219	0.296348	0.200244	0.337171	0.431978	0.539514	0.403113	0.260483	2.01395	2.67846	3.01111	1.19431	1.90713	1.95801	0.521864	0.474346	1.00177	1.02743
2810025M15Rik	23.7808	9.5897	7.10063	5.27242	4.72083	54.2061	9.88836	8.48495	5.93288	3.12438	38.9935	9.73903	7.79279	5.60265	3.9226	16.3197	11.4358	6.75473	2.96719	5.86967	2.59634	17.5831	16.5624	9.29193	3.93471
2810029C07Rik	0.149048	0.304867	1.09559	0.103081	0.15161	0.137925	0.538216	0.832876	0.277841	0.115978	0.143486	0.421542	0.964233	0.190461	0.133794	0.447944	0.453979	0.444789	0.64746	0.323453	0.279598	0.272642	0.133691	0.300389	0.400318
2810032G03Rik	0.247457	0.674874	0.346469	0.51342	0.0839036	0.0763302	0.714859	0.053184	0.131796	0.336967	0.161894	0.694867	0.199826	0.322608	0.210435	0	0	0	0	0	0	0.113109	0.887413	0.0664961	1.86927
2810047C21Rik1	0.301885	0.617485	0.760816	0.156587	0.12283	0.558715	0.65407	0.42822	0.458237	0.33474	0.4303	0.635777	0.594518	0.307412	0.228785	0.260349	0.431766	0.860849	0.300847	0.531813	0.222983	0.0828195	0.324886	0.158188	0.729734
2810049E08Rik	0	0	0	0	0	0	0	0	0	0	0	0	0	0	0	0	0	0	0	0	0	0	0	0	0
2810055G20Rik	NA	NA	NA	NA	NA	NA	NA	NA	NA	NA	NA	NA	NA	NA	NA	NA	NA	NA	NA	NA	NA	0.121466	0.277952	0.26163	0.772612
2810403A07Rik	2.48865	5.8221	7.61125	3.35622	3.48072	5.49826	5.52675	7.86253	4.62255	3.7943	3.99345	5.67443	7.73689	3.98938	3.63751	19.3893	16.9625	18.4428	24.0258	15.2788	15.3567	10.1174	7.07531	8.42619	11.9061
2810403D21Rik	0.108534	0	0	0	0.1104	0.100435	0.176364	0.0699794	0	0.0633402	0.104484	0.088182	0.0349897	0	0.0868701	0.595645	0.733028	1.07963	0.416004	0.540343	0.419924	0	0	0.0874955	0.437259
2810404M03Rik	0	0	0	0	0	0	0.0452366	0	0	0	0	0.0226183	0	0	0	0	0	0	0	0.0319835	0	0	0	0	0
2810405F15Rik	0.129282	0.198328	0.407274	0	0.0657524	0	0.280105	0.375106	0	0.0754485	0.064641	0.239216	0.39119	0	0.0706004	0.202717	1.25837	0.835911	0.842399	0.544616	0.545671	0	0	0.0781662	0.0976589
2810407C02Rik	NA	NA	NA	NA	NA	NA	NA	NA	NA	NA	NA	NA	NA	NA	NA	NA	NA	NA	NA	NA	NA	12.8122	10.394	10.679	29.226
2810408A11Rik	0.414015	3.44784	0.807399	0.490853	0.66178	0.109463	1.89013	0.495752	0.0472512	0.138067	0.261739	2.66899	0.651575	0.269052	0.399923	0.463703	1.08089	1.58851	0.113349	0.656863	1.41461	0.892441	0.477393	0.76288	0.327637
2810408I11Rik	4.2695	3.31853	4.1247	0.354333	1.56345	10.1143	1.66507	2.75284	0.818623	0.597999	7.1919	2.4918	3.43877	0.586478	1.08072	16.0003	6.37778	3.45425	5.10578	5.42843	5.52632	0	0	0.0688377	0.172008
2810408M09Rik	6.08713	9.08428	11.9062	9.56699	5.89947	10.0731	7.08952	12.3471	9.70521	5.91562	8.08011	8.0869	12.1266	9.6361	5.90754	8.67085	6.72568	7.81227	10.9348	9.07317	5.20097	4.76674	4.8505	3.85413	3.10492
2810410L24Rik	1.21478	2.07062	1.45786	0.900145	0.470728	0.963536	1.78597	2.20055	0.646994	0.540143	1.08916	1.9283	1.8292	0.77357	0.505436	0.748313	1.67766	1.76462	1.01992	1.35134	0.85455	3.72951	2.25678	1.07256	2.12658
2810417H13Rik	4.45646	6.58998	3.34963	0.179045	1.94292	8.27243	2.61038	1.04647	0.458728	0.356405	6.36444	4.60018	2.19805	0.318887	1.14966	34.6196	19.8807	6.27315	2.77269	12.212	5.70361	0.0136624	0.200982	0.231567	0.718727
2810428I15Rik	207.236	147.576	100.749	145.314	184.84	124.829	131.046	85.1203	100.87	146.698	166.032	139.311	92.9347	123.092	165.769	56.8664	137.868	122.542	46.9237	76.1309	68.7744	134.242	107.949	61.3344	51.3119
2810429I04Rik	0	0	0	0	0	0	0	0	0	0	0	0	0	0	0	0	0	0.0504295	0	0	0	0	0	0	0
2810433D01Rik	0.384693	0.550804	0	0.0798156	0.0782613	0.213591	0.125022	0.0496075	0.0614666	0.179604	0.299142	0.337913	0.0248037	0.0706411	0.128933	0.361924	0.7336	1.53067	0.0589799	0.353577	0.48711	0	0.103475	0	0.0774918
2810442I21Rik	NA	NA	NA	NA	NA	NA	NA	NA	NA	NA	NA	NA	NA	NA	NA	NA	NA	NA	NA	NA	NA	0	0	0.021807	0.0360306
2810442N19Rik	0	0	0	0	0	0	0.0658578	0	0	0	0	0.0329289	0	0	0	0	0	0	0	0	0.0855314	0	0.490247	0.0980174	0.183691
2810454H06Rik	0.663463	0.576754	1.4979	0.344136	0.539895	0.429767	0.485147	0.641669	0.212018	0.309755	0.546615	0.53095	1.06978	0.278077	0.424825	0.41613	0.869831	0.769966	0.241585	0.279491	0.746754	0.273132	0.0892871	0.628454	0.350823
2810459M11Rik	0	0.0569014	0.0292123	0	0	0	0	0	0	0	0	0.0284507	0.0146062	0	0	0	0.011052	0	0	0	0.039139	0.0571563	0.0486524	0.235476	1.17718
2810468N07Rik	0.0759307	0.232967	0.159468	0	0	0.140529	0.452411	0.195831	0	0	0.10823	0.342689	0.177649	0	0	0.0297653	0.0301663	0.025177	0	0	0.0267072	0.833047	1.4297	0.275454	1.14715
2810471M01Rik	0	0	0	0	0	0	0	0	0	0	0	0	0	0	0	0	0	0.0413903	0.00239228	0	0	0	0	0	0.0314314
2810474O19Rik	1.12801	1.95817	3.28385	2.5868	1.86644	0.865274	1.97238	1.9044	1.99807	1.63809	0.996642	1.96528	2.59413	2.29243	1.75226	14.4067	25.4219	21.1755	17.6049	22.436	11.4282	1.68583	2.72894	4.6784	7.11842
2900002K06Rik	NA	NA	NA	NA	NA	NA	NA	NA	NA	NA	NA	NA	NA	NA	NA	NA	NA	NA	NA	NA	NA	1.07169	1.12881	0.619246	0.742828
2900005J15Rik	0.190147	0.0486166	0.24959	0	0.145062	0	0.051497	0.0613003	0.189887	0.24968	0.0950735	0.0500568	0.155445	0.0949435	0.197371	0	0.0188857	0.0472866	0.0546614	0.0728197	0.484885	1.24417	0.319801	2.43345	1.10121
2900008C10Rik	0.0752083	0	0	0	0	0	0.0814739	0	0	0	0.0376042	0.040737	0	0	0	0	0.0896378	0.124687	0.0288268	0.0864064	0.0264531	1.2377	0.505755	1.48542	0.957666
2900009J06Rik	0.334245	1.36735	1.75494	1.73372	0	0.618605	1.08627	1.50857	2.93396	0.585192	0.476425	1.22681	1.63176	2.33384	0.292596	1.17789	2.25095	1.77104	1.28113	2.17146	0.702635	0.456653	0.447842	0.672627	0
2900011O08Rik	0.0404211	0	0	0	0	0.0374047	0.186397	0.0781866	0	0	0.0389129	0.0931985	0.0390933	0	0	0	0.0321175	0.0402083	0.0464793	0.0309597	0.0142174	0	0	0.0814642	0.0203559
2900026A02Rik	1.61275	0.752349	0.16206	0	0.0627932	3.51677	2.23775	0.52241	0.0123295	0.0720529	2.56476	1.49505	0.342235	0.00616475	0.067423	0.000672201	0.00613132	0.00131808	0	0.00256816	0	15.1956	17.9589	3.71271	5.93572
2900041M22Rik	0	0	0	0	0	0	0.0413086	0	0	0	0	0.0206543	0	0	0	0	0	0	0	0	0	0.313761	0.615414	0.0307402	0.0384061
2900052N01Rik	0	0	0	0	0	0	0	0	0	0	0	0	0	0	0	0	0	0	0	0	0	0.651401	0.0491408	0.117753	0.0735586
2900055J20Rik	0	0	0	0	0	0	0	0	0	0	0	0	0	0	0	0	0	0	0	0	0	0	0	0	0
2900056M20Rik	NA	NA	NA	NA	NA	NA	NA	NA	NA	NA	NA	NA	NA	NA	NA	NA	NA	NA	NA	NA	NA	0.446588	3.94159e-06	0.813614	2.20745
2900057B20Rik	0	0	0	0	0	0	0	0	0	0	0	0	0	0	0	0	0.0850705	0	0	0	0	0	0	0.0431552	0
2900060B14Rik	0	0	0.696746	0.229441	0.224973	0.409331	0	0.570413	0.353388	0.129074	0.204666	0	0.633579	0.291415	0.177024	0	0	0.220006	0.762955	0.169401	0.155585	3.93468	43.6336	0	0.11138
2900076A07Rik	0.401227	0.683901	0.561766	0.554974	0.952291	0.990095	0.869305	0.862326	0.320542	0.312205	0.695661	0.776603	0.712046	0.437758	0.632248	1.67769	2.86924	2.70511	1.17903	2.15118	3.48106	2.93213	1.25805	2.69542	3.5023
2900079G21Rik	0	0	0	0	0	0	0	0	0	0	0	0	0	0	0	0	0	0	0	0	0	0	0	0.222101	0
2900092C05Rik	0	0	0	0	0	0	0	0	0	0	0	0	0	0	0	0.158012	0	0.0445516	0.0515	0	0	0	0	0	0
2900092D14Rik	0.00471027	0	0	0	0	0	0	0	0	0	0.00235513	0	0	0	0	0.0150794	0	0	0	0	0.0115972	0	0	0	0
2900093L17Rik	NA	NA	NA	NA	NA	NA	NA	NA	NA	NA	NA	NA	NA	NA	NA	NA	NA	NA	NA	NA	NA	0	0	0	0
2900097C17Rik	7.45022	17.2169	19.0758	8.01589	7.95362	7.55722	15.7587	13.0054	7.60522	6.47073	7.50372	16.4878	16.0406	7.81055	7.21218	36.7157	48.2962	52.764	44.2678	45.3399	35.0936	15.8895	19.3755	12.3628	35.2923
3000002C10Rik	92.0929	31.5016	50.5673	74.4215	141.54	75.59	49.9291	58.629	49.9989	102.671	83.8414	40.7154	54.5981	62.2102	122.106	45.2692	42.2088	19.8176	37.2689	33.8598	88.4306	0.854744	0.127008	34.3351	12.8247
3010001F23Rik	0.385228	0.787958	0.539366	0	0.130617	0.475308	0.834643	0.662354	0.102587	0.0770758	0.430268	0.8113	0.60086	0.0512935	0.103846	1.06224	1.47945	1.58016	0.59062	0.594518	0.180662	0	0.345138	0	0.133044
3010026O09Rik	3.90108	5.41458	6.14473	11.4664	6.70805	3.09425	3.27018	4.37181	7.86568	6.12527	3.49767	4.34238	5.25827	9.66604	6.41666	2.98567	4.90785	4.92767	2.06487	5.26448	5.55386	2.54694	3.12225	2.13402	4.02268
3010033K07Rik	0	0	0	0.522808	0.256313	0	0	0	0	0.147055	0	0	0	0.261404	0.201684	0	0	0	0	0	4.25422	NA	NA	NA	NA
3100003L05Rik	0	0	0	0	0	0	0	0	0	0	0	0	0	0	0	0	0	0	0	0	0	0	0	0	0
3110001D03Rik	NA	NA	NA	NA	NA	NA	NA	NA	NA	NA	NA	NA	NA	NA	NA	NA	NA	NA	NA	NA	NA	30.5673	30.6537	35.1062	33.3816
3110001I22Rik	0.061793	0.442376	0.713771	0.576933	1.1314	0.285909	0.236236	0.438263	0.296675	0.543031	0.173851	0.339306	0.576017	0.436804	0.837216	1.52951	1.45064	1.10784	1.65825	1.0649	1.87187	1.19207	0.941332	0.647888	0.561556
3110002H16Rik	5.86519	5.53581	10.7756	17.5444	21.7988	13.3397	7.78693	13.4969	20.1556	22.4628	9.60244	6.66137	12.1363	18.85	22.1308	14.2027	11.3883	9.99026	16.4048	16.2465	23.4909	12.8089	9.7073	10.2586	15.7143
3110007F17Rik	0	0	0	0	0	0	0	0	0	0	0	0	0	0	0	0.380767	2.21891	1.73114	26.643	14.6237	0.811413	1.33119	1.95826	0.929865	1.89549
3110009E18Rik	1.48817	4.26152	0.937626	4.63145	3.93575	4.15424	3.25385	1.91904	9.74901	4.16874	2.8212	3.75768	1.42833	7.19023	4.05225	4.66696	6.74001	8.20641	2.16753	4.81222	4.72757	0	9.38789e-07	1.57349	2.54808
3110009F21Rik	0	0	0	0	0	0	0	0	0	0	0	0	0	0	0	0	0.0243763	0	0.0235176	0	0	0	0	0	0
3110015C05Rik	0	0	0	0	0	0	0	0	0	0	0	0	0	0	0	0	0	0	0	0	0	0	0	0	0
3110021A11Rik	0	0.430191	0.147235	0.145455	0.142623	0	0.151893	0.0904042	0.448065	0.163654	0	0.291042	0.11882	0.29676	0.153139	0.439711	0.668453	0.929827	0.429938	0.912837	0.739755	0.38421	0	0.791229	0.635492
3110021N24Rik	0.0540695	0.552978	0.576453	0.39264	0.164997	0.300208	0.439305	0.388306	0.302375	0.315547	0.177139	0.496142	0.48238	0.347508	0.240272	0.531601	0.454484	0.593146	0.437165	0.414135	0.366906	1.90889	1.20835	0.503554	1.09237
3110035E14Rik	0	0	0	0	0	0	0	0	0	0.0170104	0	0	0	0	0.0085052	0	0	0.0289942	0	0	0	0.0400003	0	0	0.0880717
3110039I08Rik	0.165893	0	0	0.172096	0.168745	0	0.0898566	0	0	0.0968143	0.0829465	0.0449283	0	0.086048	0.13278	0.0650309	0.263628	0	0	0	0.116699	0.45441	0.222821	0.200603	0.250629
3110039M20Rik	0.936195	0.27356	1.40441	0.41623	0.544166	3.09405	2.17326	0.948558	0.747931	0.390257	2.01512	1.22341	1.17648	0.582081	0.467212	0.786415	0.956412	1.24169	0.410099	0.768279	0.70562	0	0	0	0
3110040N11Rik	2.92881	4.08456	2.65613	4.4194	2.16667	4.31177	3.8939	4.12015	5.31783	2.40848	3.62029	3.98923	3.38814	4.86862	2.28757	8.87177	14.4654	12.1244	4.94961	9.07503	10.5825	6.01979	8.766	6.38564	8.27976
3110043O21Rik	1.01642	1.75231	2.28714	10.9359	16.6752	2.84858	1.91905	2.52779	13.99	19.6088	1.9325	1.83568	2.40747	12.4629	18.142	3.0737	3.86504	3.78429	5.4542	5.00468	48.0642	3.54695	8.32497	3.59362	34.3607
3110045C21Rik	2.11e-09	3.03e-10	0.196537	6.3e-08	0.685857	0	0.0507458	0.120492	1.31e-09	0.0550917	1.05734e-09	0.0253729	0.158515	3.2146e-08	0.370474	0.370164	0.487855	0.565057	0.472982	0.39788	0.40512	0	0.126083	0.249472	0.380352
3110047P20Rik	NA	NA	NA	NA	NA	NA	NA	NA	NA	NA	NA	NA	NA	NA	NA	NA	NA	NA	NA	NA	NA	0	0	0	0
3110052M02Rik	0.0626581	0.42721	0.376503	0.433341	0.336381	0.144956	0.399727	0.208733	0.108459	0.381922	0.103807	0.413469	0.292618	0.2709	0.359152	0.820109	1.25711	1.53512	0.779198	0.970499	1.46313	0.35116	0.499005	0.728217	1.42345
3110056K07Rik	0.0921934	1.32003	1.64579	0.478207	1.03156	0.93845	0.975341	0.713319	0.58923	0.645644	0.515322	1.14769	1.17955	0.533718	0.838602	3.15898	3.44774	2.84782	3.19518	3.27985	2.92343	0.198981	2.97478e-07	2.94361	3.44139
3110057O12Rik	0.285007	0.233185	0.199522	0.670173	0.908375	0.0351652	0.247001	0.171512	0.789337	1.03124	0.160086	0.240093	0.185517	0.729755	0.969808	0.290483	1.50973	2.02865	0.713707	1.57173	6.19519	1.30358	1.22729	1.39388	2.21033
3110062M04Rik	5.74317	4.03028	2.06717	2.23132	3.00394	2.68055	4.13906	2.5511	3.23724	2.73734	4.21186	4.08467	2.30913	2.73428	2.87064	4.99082	5.89382	4.74844	3.12942	5.50065	6.13333	0.828279	0.586393	2.93938	2.24633
3110070M22Rik	0.0940888	0.218323	0.790415	0.292822	0.478532	0.34827	0.304385	0.424658	0	0.0572491	0.221179	0.261354	0.607537	0.146411	0.267891	0.30331	1.40463	1.36719	0.844503	1.24513	0.794256	0.773991	0.885333	0.868181	0.693896
3110079O15Rik	0	7.92318	1.41483	2.09658	0	0	0.547344	0.21718	0	0	0	4.23526	0.816005	1.04829	0	0.264082	0.26764	0	0.129106	0	0	0	0	0	0
3110082I17Rik	7.74659	7.4274	4.86625	8.17978	1.75888	13.889	6.29397	6.10965	5.35994	1.41277	10.8178	6.86069	5.48795	6.76986	1.58583	18.9275	10.0366	8.66904	10.2091	10.6217	5.47377	3.98425	5.3959	1.06195	2.47305
3110082J24Rik	7.81e-09	0	2.4e-07	0	0	0.142882	0.353506	0.119072	0	0	0.071441	0.176753	0.0595361	0	0	0.132951	0.368056	0.204788	0	0.0591313	0.079863	0	0	0.0622368	0
3110099E03Rik	0	0	0.112256	0	0	0	0.0193012	0	0.028468	0.0207957	0	0.0096506	0.056128	0.014234	0.0103979	0	0.0566274	0.0236308	0	0.0136465	0.0376006	0	0.0479533	0	0
3200001D21Rik	0	0	0.0878314	0	0	0.0387	0	0.0269647	0.0668218	0	0.01935	0	0.057398	0.0334109	0	0.016394	0	0.0277338	0.0160296	0	0.0588388	0.286908	0.225097	0.0674282	0
3230401D17Rik	NA	NA	NA	NA	NA	NA	NA	NA	NA	NA	NA	NA	NA	NA	NA	NA	NA	NA	NA	NA	NA	4.52248	4.5644	6.94181	8.23767
3300002I08Rik	0.0652579	0.200221	0.925111	1.42166	0.663798	0	0.29515	0.225107	0.208539	0.0571263	0.0326289	0.247686	0.575109	0.815099	0.360462	0.654886	0.737598	0.881754	0.786654	0.883449	0.748276	0.35735	0.941846	0.177552	0.989194
3300002P13Rik	0	0	0	0	0	0	0	0	0	0	0	0	0	0	0	0	0	0	0	0	0	NA	NA	NA	NA
3300005D01Rik	3.4737	0	0.22051	0	0.618585	22.435	1.89003	0.518355	0.24325	0.0888454	12.9543	0.945015	0.369432	0.121625	0.353715	50.1171	25.8591	15.2515	8.04969	2.87159	4.84196	0	0.423353	0	0.31725
3425401B19Rik	0.0162735	0	0	0	0.0165533	0	0	0	0	0	0.00813675	0	0	0	0.00827665	0	0	0	0	0	0.0171717	0	0.0438117	1.51524	0.237662
3632451O06Rik	0	0	0	0	0	0	0	0.0220363	0	0	0	0	0.0110182	0	0	0	0.0271563	0.0339973	0.0130998	0	0	0.140697	0.827893	0.0826563	2.7022
3632454L22Rik	0.0786547	0	0	0	0	0	0	0	0	0.0150297	0.0393273	0	0	0	0.00751485	0.00252389	0.0613724	0.0172764	0.00398835	0.0390666	0	0	0	0.0415228	0.0562007
3830403N18Rik	0	0	0.111876	0.110524	0.0541856	0	0.144269	0	0.085115	0.186528	0	0.0721345	0.055938	0.0978195	0.120357	0.856165	1.98936	1.8193	1.32716	1.50963	2.8105	0	0.00651019	0.236191	0.295091
3830406C13Rik	1.43356	3.19103	2.0606	3.16999	3.70918	1.85417	3.82284	1.36598	2.35012	1.8411	1.64386	3.50693	1.71329	2.76005	2.77514	8.29807	13.1324	12.9726	4.40166	11.0962	11.6433	1.82546	6.99556e-05	6.94045	13.6199
3830408C21Rik	0.0513248	0.629888	0.323374	0.425953	0.417658	0.142484	0.88961	0.330926	0.410036	0.20967	0.0969044	0.759749	0.32715	0.417994	0.313664	0.442631	0.713674	1.10618	0.314758	0.589668	0.667944	0.422471	0.138106	0.413758	0.956337
3830417A13Rik	0	0	0	0	0	0	0	0	0	0	0	0	0	0	0	0.283035	0.215136	0.0997524	0	0.0460846	0.0846521	0	0.161881	0	0.0606008
3830432H09Rik	0	0	0	0	0	0	0.0639294	0	0	0	0	0.0319647	0	0	0	0.0154223	0	0	0	0	0	NA	NA	NA	NA
3930402G23Rik	0	0.0336443	0.0690897	0.61429	2.40931	0.182653	0.0356377	0	0.341661	2.15024	0.0913265	0.034641	0.0345449	0.477975	2.27977	0.0773749	0.182974	0.0436318	0.176528	0.516535	2.99687	0.0902865	0.309905	0.304981	0.0497004
4430402I18Rik	0.0892661	0.182588	0	0.324115	2.79432	0.0413024	0.0990725	7.84e-11	0.18268	2.23858	0.0652843	0.14083	3.92233e-11	0.253397	2.51645	0.0533245	0.179004	0.568927	0.0710299	0.121814	2.22812	2.75039	1.89284	5.72964	3.88061
4631405J19Rik	0	0.173153	0	0	3.27215	0	0.0917063	0.054582	0	2.12435	0	0.13243	0.027291	0	2.69825	0	0.134527	0.0561388	0	0.0648389	4.58541	NA	NA	NA	NA
4632415K11Rik	NA	NA	NA	NA	NA	NA	NA	NA	NA	NA	NA	NA	NA	NA	NA	NA	NA	NA	NA	NA	NA	1.91293	1.62917	1.34565	2.217
4632415L05Rik	0.946944	2.4001	2.81928	0.85932	1.11591	0.987744	1.85834	1.70909	1.29689	1.11067	0.967344	2.12922	2.26418	1.07811	1.11329	2.15024	3.57965	3.83635	2.11509	2.97952	2.8672	1.9533	2.12513	1.27579	2.76887
4632427E13Rik	0	0	0.196299	0	0	0	1.21505	0.723178	0.298687	0.109094	0	0.607525	0.459738	0.149343	0.054547	0.366398	0.816935	0.991739	1.14641	1.21702	0.657509	0.767836	0.75302	0.904192	1.78865
4632428C04Rik	0	0	0	0.121669	0.278366	0	0.0211757	0	0.0624654	0.205338	0	0.0105878	0	0.0920672	0.241852	0.0153252	0.0155317	0.0259258	0.0149846	0.104803	1.22381	0.482785	0.420861	0.141823	0.0393755
4632428N05Rik	0.43095	0.0574878	0.0590266	6.43226	12.3481	0.0520163	0.608938	0.157053	6.79432	14.2338	0.241483	0.333213	0.10804	6.61329	13.291	0.051415	0.0967714	0.0497023	0.00718173	0.243892	12.895	0.00059311	0.000845476	3.45791	44.1136
4632434I11Rik	NA	NA	NA	NA	NA	NA	NA	NA	NA	NA	NA	NA	NA	NA	NA	NA	NA	NA	NA	NA	NA	0	0.0360625	0.0540011	0.134935
4732415M23Rik	NA	NA	NA	NA	NA	NA	NA	NA	NA	NA	NA	NA	NA	NA	NA	NA	NA	NA	NA	NA	NA	1.13542	0.371171	2.34292	0.69695
4732416N19Rik	0.0355713	0	0.551524	0.191141	8.72e-69	0.231786	0.368808	0.0239919	0.200108	0	0.133679	0.184404	0.287758	0.195625	4.36078e-69	0.599652	0.186726	0.249159	0	0	0.390598	3.13956e-14	0.148576	0.474741	0.254707
4732456N10Rik	0	0	0.0783703	0	0	0	0	0	0	0	0	0	0.0391852	0	0	0	0	0	0.0858175	0	0	0	0	0	0
4732471D19Rik	NA	NA	NA	NA	NA	NA	NA	NA	NA	NA	NA	NA	NA	NA	NA	NA	NA	NA	NA	NA	NA	0.80618	1.50474	NA	NA
4732471J01Rik	0.0440669	0.426826	0.285727	1.63872	1.86274	0.0386269	0.0463915	0.547229	2.43287	2.70893	0.0413469	0.236609	0.416478	2.03579	2.28584	0.34655	0.685792	0.707165	0.285952	1.18099	5.73547	0.290569	0.416417	9.10439	8.62572
4732490B19Rik	0	0	0	0	0	0	0	0	0	0	0	0	0	0	0	0	0	0.0128588	0	0.0148516	0.0136403	0	0.104371	0.0468947	0
4732491K20Rik	0.0585504	0.0898206	0.0922249	0.0303699	0.238228	0.189634	0.0792853	0.0377514	0.0233881	0.102509	0.124092	0.084553	0.0649881	0.026879	0.170369	0.206569	0.569902	0.310625	0.0673258	0.269073	0.432474	0.281227	0.354601	0.224203	0.398057
4831440E17Rik	0	0.188861	0.0816491	0.0806619	0.0988639	0	0.094761	0.0752002	0.0621183	0.23823	0	0.141811	0.0784246	0.0713901	0.168547	0.00762003	0.254849	0.232035	0.0745066	0.264273	0.423904	0.48024	0.0784956	2.38975	1.76205
4833403I15Rik	0	0	0	0.0299167	0	0	0.0156204	0.037188	0.0230391	0	0	0.0078102	0.018594	0.0264779	0	0.0452191	0.0572854	0.0191243	0.265284	0.0883524	0.0507166	0	0.970307	0.162737	2.14938
4833411C07Rik	0	0	0	0	0.177222	0	0	0	0	0.152517	0	0	0	0	0.16487	0	0	0	0	0	0.245124	NA	NA	NA	NA
4833412C05Rik	0	0	0	0	0	0	0	0	0	0	0	0	0	0	0	0	0	0	0	0	0	0	0.132975	0.239198	0.0996161
4833415N18Rik	0	0	0	0	0	0.202132	0.022184	0	0	0	0.101066	0.011092	0	0	0	0.0856266	0.238645	0.0724274	0.348847	0.467056	0.0768294	NA	NA	NA	NA
4833417C18Rik	0.155947	0.0797447	0.00744356	0.161778	0.713826	0.432929	0.0929163	0.502747	0.18688	0.500555	0.294438	0.0863305	0.255095	0.174329	0.60719	0.275094	0.123911	0.160347	0.0320214	0.122159	0.481909	0.855433	0.104866	0.731256	0.204264
4833418N02Rik	0.524538	0.268227	0.344258	0.816229	0.0666945	0.303372	0.497207	0.253654	0.26191	0.0382648	0.413955	0.382717	0.298956	0.539069	0.0524797	0.359838	0.547029	0.847888	0.251314	0.627749	0.691862	0.269796	0.970165	0.555003	0.825484
4833419F23Rik	0.128409	0.131326	0	0	0.653085	0.356481	0.139107	0.0827942	0	0.524574	0.242445	0.135216	0.0413971	0	0.58883	0.302023	1.07132	1.1496	0.147655	0.0983526	0.587153	0.351929	1.38055	0.362313	1.35799
4833420G17Rik	0.550293	1.08805	0.847524	0.418638	0.298521	0.64501	0.756755	0.664614	0.205161	0.214404	0.597652	0.922403	0.756069	0.311899	0.256462	7.17622	11.3698	12.4092	7.50285	8.80906	7.23121	5.78912	5.47993	7.3057	7.65638
4833422C13Rik	0	0	5.63e-183	6.74e-277	1.34e-156	0	0.0283697	0	0	0.0305664	0	0.0141849	2.816e-183	3.3688e-277	0.0152832	0.0209997	0.189646	0.491811	0.12274	0.242984	0.149058	6.13465e-35	1.42684e-101	0.0724538	0.0263763
4833423E24Rik	0	0	0	0	0	0	0	0	0	0	0	0	0	0	0	0	0	0	0	0	0	0	0	0	0
4833424O15Rik	NA	NA	NA	NA	NA	NA	NA	NA	NA	NA	NA	NA	NA	NA	NA	NA	NA	NA	NA	NA	NA	0.0310764	0	0	0.0114028
4833427F10Rik	0	0	0	0	0	0	0.0370515	0	0	0	0	0.0185258	0	0	0	0.0268148	0	0	0.170422	0	0	0	0	0.0137861	0
4833427G06Rik	1.67465	2.33549	0.159867	0.157934	0	4.50818	4.70035	1.07976	0.243253	0	3.09142	3.51792	0.619814	0.200594	0	1.37263	4.47578	4.26556	0.700235	0.349818	0.26774	0	0	0	0
4833428L15Rik	0	0	0	0	0	0	0	0	0	0	0	0	0	0	0	0	0	0	0	0	0	0	0	0	0
4833439L19Rik	31.7181	41.0905	55.7321	40.0067	40.3542	30.0013	40.17	62.3537	51.1954	49.4968	30.8597	40.6302	59.0429	45.6011	44.9255	28.0172	23.8457	27.1195	35.2035	36.0239	34.7423	13.5058	9.01236	44.4256	43.6281
4921501E09Rik	0	0	0	0	0	0	0	0	0	0	0	0	0	0	0	0	0.00930587	0	0	0	0	0	0	0	0
4921504A21Rik	0.186567	0.0953977	0	0	0	0.129482	0.252646	0.39097	0	0.0544371	0.158025	0.174022	0.195485	0	0.0272186	0.0731354	0.166777	0.077328	0.0536314	0.0357225	0	NA	NA	NA	NA
4921504E06Rik	0	0	0	0	0	0	0	0	0	0	0	0	0	0	0	0	0	0	0	0	0	0	0	0	0
4921506M07Rik	0	0	0	0	0	0	0	0	0	0	0	0	0	0	0	0.0267307	0.0270909	0.0226102	0	0	0.0239844	0	0	0	0
4921507L20Rik	0.0645931	0.132121	0.0678286	0.201026	0.328518	0.119546	0.139949	0.124943	0.258019	0.263874	0.0920696	0.136035	0.0963858	0.229522	0.296196	0.126604	0.230958	0.535443	0.346612	0.247369	0.318072	0.0885973	0.0868877	0.390541	0.325288
4921507P07Rik	0	0	0	0	0.207607	0	0.0442202	0.0263191	0	0.190577	0	0.0221101	0.0131596	0	0.199092	0.0160015	0.0486513	0.0812095	0	0.0312649	0.0574301	0.840128	0.768989	1.84279	0.513914
4921508A21Rik	NA	NA	NA	NA	NA	NA	NA	NA	NA	NA	NA	NA	NA	NA	NA	NA	NA	NA	NA	NA	NA	0	0	0.00315664	0.00690171
4921508D12Rik	0	0	0	0	0	0	0	0	0	0	0	0	0	0	0	0	0	0	0	0	0	0	0	0	0
4921509C19Rik	0	0	0	0	0	0	0	0	0	0	0	0	0	0	0	0	0.00348494	0.00232685	0.00268974	0	0	0	0	0	0
4921509O07Rik	0	0	0	0	0	0	0	0	0	0	0	0	0	0	0	0	0	0	0	0	0.0129419	0	0	0	0
4921511C10Rik	0	0	0	0	0	0	0	0	0	0	0	0	0	0	0	0.0270704	0.0274351	0	0.105875	0.0264461	0	0.284138	0.0928851	0.05567	0.0347764
4921511C20Rik	0	0	0	0	0	0	0	0	0	0	0	0	0	0	0	0	0	0	0	0	0	0	0	0	0
4921511H03Rik	0	0	0	0	0	0	0	0	0	0	0	0	0	0	0	0	0	0	0	0	0	0	0	0	0
4921511I17Rik	0	0	0	0	0	0	0	0	0	0	0	0	0	0	0	0	0	0	0	0	0	5.52815e-55	0.42055	0	0
4921511M17Rik	0	0	0	0	0	0	0.0181783	0	0	0	0	0.00908915	0	0	0	0	0	0	0	0	0	NA	NA	NA	NA
4921513I03Rik	0	0	0	0	0	0	0	0.0817167	0.0506259	0	0	0	0.0408584	0.025313	0	0.0993643	0	0.147083	0.0728667	0.0242682	0	0	0.0852428	0.229884	0.0319124
4921515E04Rik	0	0	0	0	0	0	0.00745757	0	0	0	0	0.00372879	0	0	0	0	0	0.00342391	0	0	0	0	0	0	0
4921517D22Rik	0.00739851	0.00756657	0.0155382	0	0.0150514	0	0.00801488	0.0190813	0	0	0.00369925	0.00779073	0.0173097	0	0.0075257	0	0.00587867	0	0.00661685	0.0113335	0	0.0406127	0.0331908	0.00298218	0
4921524J17Rik	0.750242	3.36804	1.9034	2.36856	1.65304	2.02438	1.76051	1.73209	1.19859	1.27669	1.38731	2.56427	1.81774	1.78357	1.46487	10.2327	8.04554	8.90668	9.19798	9.31139	8.89354	0.00274255	5.06101	2.31784	3.77719
4921524L21Rik	0	0	0	0	0	0	0	0	0	0	0	0	0	0	0	0	0	0	0	0	0	0	0	0	0
4921525B02Rik	NA	NA	NA	NA	NA	NA	NA	NA	NA	NA	NA	NA	NA	NA	NA	NA	NA	NA	NA	NA	NA	0	0	0	4.91112e-09
4921525O09Rik	0	0	0.0595194	0	0	0	0.0307011	0	0.0226411	0	0	0.0153505	0.0297597	0.0113206	0	0	0	0	0	0.130239	0.0498405	0	0	0	0
4921529L05Rik	0	0	0	0	0	0	0	0	0	0	0	0	0	0	0	0	0	0	0	0	0	NA	NA	NA	NA
4921530D09Rik	NA	NA	NA	NA	NA	NA	NA	NA	NA	NA	NA	NA	NA	NA	NA	NA	NA	NA	NA	NA	NA	0	0	0.138244	0.057573
4921530L18Rik	NA	NA	NA	NA	NA	NA	NA	NA	NA	NA	NA	NA	NA	NA	NA	NA	NA	NA	NA	NA	NA	0.399645	0.5879	0.470333	0.954887
4921530L21Rik	0	0	0	0	0	0	0	0	0	0	0	0	0	0	0	0	0	0	0	0	0	0	0	0	0
4921531C22Rik	0.920045	1.51597	1.4492	0.53025	2.54763	0.851388	2.57479	1.21939	1.59256	1.96876	0.885717	2.04538	1.3343	1.0614	2.2582	1.98365	3.57399	3.01678	1.17549	1.84002	3.0563	3.436	1.51292	3.35825	2.54832
4921531P14Rik	0	0	0	0	0	0	0	0	0	0	0	0	0	0	0	0	0	0	0	0	0	0	0	0	0
4921533I20Rik	0	0.223394	0.114687	0.1133	0.222187	0.101066	0.295787	0	0.0872532	0.063738	0.050533	0.259591	0.0573435	0.100277	0.142962	0.12844	0.260341	0.615633	0.376755	0.669214	0.345732	0.29941	0.734082	0.264135	0.495006
4921534H16Rik	0	0	0	0	0	0	0	0	0	0	0	0	0	0	0	0	0	0	0	0	0	NA	NA	NA	NA
4921536K21Rik	0.684334	0.110507	0.22693	0.33628	0.329731	0.266638	0.253618	0.278675	0.233394	0.357335	0.475486	0.182062	0.252802	0.284837	0.343533	0.550645	0.400661	0.274681	0.372742	0.565532	0.582751	0.197693	0.193878	0.464572	0.253936
4921539E11Rik	0	0	0	0	0	0	0	0	0	0	0	0	0	0	0	0	0.0160551	0	0	0	0	0	0	0.032582	0
4922501C03Rik	NA	NA	NA	NA	NA	NA	NA	NA	NA	NA	NA	NA	NA	NA	NA	NA	NA	NA	NA	NA	NA	0.750151	0.919595	0.543848	2.56307
4922501L14Rik	NA	NA	NA	NA	NA	NA	NA	NA	NA	NA	NA	NA	NA	NA	NA	NA	NA	NA	NA	NA	NA	0	0.06481	0.0194158	0.0242576
4922502D21Rik	0	0	0	0	0	0	0	0	0	0	0	0	0	0	0	0	0	0	0	0	0	0	0	0	0
4922502H24Rik	0	0	0	0	0	0	0	0	0	0	0	0	0	0	0	0	0	0	0	0	0	0	0	0	0
4922502N22Rik	0	0	0	0	0	0	0	0	0	0	0	0	0	0	0	0	0	0	0	0	0	0	0	0	0
4922505E12Rik	NA	NA	NA	NA	NA	NA	NA	NA	NA	NA	NA	NA	NA	NA	NA	NA	NA	NA	NA	NA	NA	0	0	0	0
4922505G16Rik	NA	NA	NA	NA	NA	NA	NA	NA	NA	NA	NA	NA	NA	NA	NA	NA	NA	NA	NA	NA	NA	1.73336e-11	0.0722933	NA	NA
4930401C15Rik	0	0	0	0	0	0	0	0	0	0	0	0	0	0	0	0	0	0	0	0	0	0	0	0	0
4930401O10Rik	0	0	0	0	0	0	0	0	0	0	0	0	0	0	0	0	0	0	0	0	0	0	0	0	0
4930401O12Rik	0	0	0	0	0	0	0	0	0	0	0	0	0	0	0	0	0	0	0	0	0	0	0	0	0
4930402F06Rik	0	0	0	0	0	0	0	0	0	0	0	0	0	0	0	0	0.0318889	0	0	0	0	0	0	0	0
4930402F11Rik	0	0	0	0	0	0	0	0	0	0	0	0	0	0	0	0	0	0.0362137	0	0	0	0	0	0	0
4930402H24Rik	2.49259	3.37359	2.17345	7.3726	9.63249	3.19503	5.66092	3.78157	9.61516	11.2505	2.84381	4.51725	2.97751	8.49388	10.4415	17.7208	13.8547	18.306	4.04802	13.7096	20.4389	13.1988	11.0456	7.10541	27.4415
4930402K13Rik	0	0	0	0	0	0	0	0	0	0	0	0	0	0	0	0	0	0	0	0	0	0	0	0	0
4930404A05Rik	0	0	0	0	0	0	0	0	0	0	0	0	0	0	0	0	0	0	0	0	0	0	0	0	0
4930404A10Rik	0	0	0	0	0	0	0	0	0	0	0	0	0	0	0	0	0	0	0	0	0	0	0	0	0
4930404H11Rik	0	0	0	0	0	0	0	0	0	0	0	0	0	0	0	0	0	0	0	0	0	0	0.207424	0	1.0886
4930404I05Rik	0	0.344613	0	0	0	0	0.0608385	0.0724201	0.0897328	0	0	0.202726	0.0362101	0.0448664	0	0.35224	0.178493	0.595886	0.473564	0.215073	0.592596	0.61581	0.603927	0.860198	0.565637
4930404N11Rik	14.3402	17.0197	20.2639	96.4212	108.95	10.485	10.4525	12.5564	86.984	121.813	12.4126	13.7361	16.4102	91.7026	115.382	3.60882	5.13448	6.86818	4.47861	15.1194	33.875	10.9094	11.8877	3.35394	6.68671
4930405A10Rik	0	0	0	0	0	0	0	0	0	0	0	0	0	0	0	0	0	0	0	0	0	0	0	0	0
4930405A21Rik	0.219812	0.562014	0.692469	0.342048	0.335387	0.203409	0.654844	0.212592	0.351219	0.128282	0.211611	0.608429	0.452531	0.346633	0.231834	0.0861677	0.654965	0.546639	0.210631	0.589263	0.541204	0	0	0.354406	0.498135
4930405D11Rik	0	0	0	0	0	0	0	0	0	0	0	0	0	0	0	0	0	0	0	0	0	0	0	0	0
4930405J17Rik	0	0	0	0	0	0	0	0	0	0	0	0	0	0	0	0	0	0	0	0	0	0	0	0	0
4930405L22Rik	0	0	0	0	0	0	0	0	0	0	0	0	0	0	0	0	0	0	0	0	0	NA	NA	NA	NA
4930405P13Rik	NA	NA	NA	NA	NA	NA	NA	NA	NA	NA	NA	NA	NA	NA	NA	NA	NA	NA	NA	NA	NA	0.455072	3.23327e-09	0.472375	0.103234
4930406D18Rik	0	0	0	0	0	0	0	0	0	0	0	0	0	0	0	0	0	0	0	0	0	0	0	0	0
4930407I10Rik	0	0	0	0	0	0	0.0105384	0	0	0	0	0.0052692	0	0	0	0	0	0	0.0149147	0	0	0	0	0.00784227	0
4930408F14Rik	NA	NA	NA	NA	NA	NA	NA	NA	NA	NA	NA	NA	NA	NA	NA	NA	NA	NA	NA	NA	NA	0	0	0	0
4930412B13Rik	0	0	0	0	0	0	0	0	0	0	0	0	0	0	0	0	0	0	0	0	0	0	0	0	0
4930412C18Rik	0	0.0236184	0	0	0.0234909	0	0	0.0297803	0	0	0	0.0118092	0.0148901	0	0.0117454	0.099582	0.192672	0.245038	0.00885168	0.176883	0.31679	0.6656	0.373004	1.39629	2.11665
4930412D23Rik	0	0	0	0	0	0	0	0	0	0	0	0	0	0	0	0	0	0.0469456	0.162802	0.189773	0	NA	NA	NA	NA
4930412O13Rik	0	0	0	0.0235201	0	0	0	0.0292367	0	0	0	0	0.0146184	0.01176	0	0	0	0	0	0	0	0	0	0	0.0114177
4930413E15Rik	0	0	0	0	0	0	0	0	0	0	0	0	0	0	0	0	0	0	0	0	0	0	0	0	0
4930413F20Rik	0	0	0	0	0	0	0	0	0	0	0	0	0	0	0	0	0	0	0	0	0	0	0.0938076	0	0
4930413G21Rik	1.08858	4.45323	4.42001	4.51714	1.77167	1.27597	2.67301	4.49203	2.14519	2.20234	1.18227	3.56312	4.45602	3.33116	1.987	1.93451	2.59487	3.17636	3.86646	3.89095	2.19522	9.95296	10.0537	3.481	3.83742
4930413M19Rik	0	0	0	0	0	0	0	0	0	0	0	0	0	0	0	0	0	0	0	0	0	0	0	0	0
4930414L22Rik	2.38467	1.60032	1.51482	1.30751	0.63735	0.698927	2.34498	1.97262	1.01355	1.70602	1.5418	1.97265	1.74372	1.16053	1.17169	1.33386	1.55171	1.532	0.793928	2.28883	1.6662	5.08026	4.72414	1.66323	1.92242
4930414N06Rik	0	1.98e-05	8.36e-06	0.0142693	2.65e-06	0	6.8e-08	9.03e-08	6.3e-06	1.31e-05	0	9.91381e-06	4.22378e-06	0.0071378	7.86061e-06	2.31172e-07	3.92574e-07	0.113103	3.76068e-07	5.34153e-07	1.26258e-07	3.44466e-08	0	9.64115e-07	5.07273e-07
4930415F15Rik	0	0.161937	1.1639	0	0.161063	0.293049	0.771893	0.408371	0	0.184814	0.146525	0.466915	0.786135	0	0.172938	0.0620703	0.314533	0.157507	0.242763	0.121278	0.50124	0	0	0.127647	0.239219
4930415L06Rik	0	0	0	0	0	0	0	0	0	0	0	0	0	0	0	0	0	0.0119427	0	0	0	0	0	0	0
4930415O20Rik	0	0.73667	0.756389	0.996325	1.22115	0.222185	0.780317	0.309621	0.191819	1.54135	0.111092	0.758494	0.533005	0.594072	1.38125	0.470608	0.476948	0.238839	0.0920295	0.183902	1.09787	0.328485	0	0.58068	0.604573
4930417O13Rik	0	0	0	0	0	0	0	0	0	0	0	0	0	0	0	0	0	0	0	0	0	0.134069	0	0	0
4930417O22Rik	0	0	0	0	0	0	0	0	0	0	0	0	0	0	0	0	0	0	0	0	0	0	0	0	0
4930419G24Rik	0	0	0	0	0	0	0	0	0	0	0	0	0	0	0	0	0	0	0	0	0	0	0	0	0
4930420K17Rik	NA	NA	NA	NA	NA	NA	NA	NA	NA	NA	NA	NA	NA	NA	NA	NA	NA	NA	NA	NA	NA	11.2474	8.79451	NA	NA
4930422G04Rik	NA	NA	NA	NA	NA	NA	NA	NA	NA	NA	NA	NA	NA	NA	NA	NA	NA	NA	NA	NA	NA	0.244147	0.256538	0.0768136	0.275111
4930423M02Rik	0	0	0	0	0	0	0	0	0	0	0	0	0	0	0	0	0	0	0	0	0	0	0	0	0
4930425K10Rik	0	0	0	0	0	0	0	0	0	0	0	0	0	0	0	0	0	0	0	0	0	0	0	0	0
4930425L21Rik	0	0	0	0	0	0	0	0	0	0	0	0	0	0	0	0	0	0	0	0	0	NA	NA	NA	NA
4930425O10Rik	0	0	0	0	0	0	0	0	0	0	0	0	0	0	0	0	0	0	0	0	0	0	0	0	0
4930426D05Rik	0	0	0	0	0	0	0	0	0	0	0	0	0	0	0	0	0	0	0	0	0	0	0	0	0
4930426L09Rik	0.203452	0.416147	0.142429	0.140707	0.137967	0.627566	0.293869	0.0437264	0.0541796	0	0.415509	0.355008	0.0930777	0.0974433	0.0689835	2.68506	1.18549	1.07937	0.129969	0.415547	0.453216	0.0930153	0.364882	0.0546713	0.170763
4930427A07Rik	16.2803	8.2686	12.6963	0.57251	1.96476	8.80941	2.22998	3.87854	0.507028	0.628038	12.5449	5.24929	8.28742	0.539769	1.2964	3.85081	2.43589	1.10709	1.04707	1.31036	0.78615	0.302949	0.297103	0.0444895	0.198405
4930428D18Rik	0	0	0	0	0	0	0	0	0	0	0	0	0	0	0	0	0	0	0	0	0	0	0	0	0
4930428E07Rik	0	0	0	0	0	0	0	0	0	0	0	0	0	0	0	0	0	0	0	0	0	0	0	0	0
4930428G15Rik	0	0	0	0	0	0	0	0	0	0	0	0	0	0	0	0	0	0	0	0	0	0	0	0	0
4930428O21Rik	0	0	0	0	0	0	0	0	0	0.0330337	0	0	0	0	0.0165168	0	0	0	0	0	0	0	0	0	0.0285054
4930429B21Rik	0.965357	0.591152	0.109637	0.105156	0.106733	1.11275	0.331976	0.57738	0.241908	0.0918202	1.03905	0.461564	0.343508	0.173532	0.0992766	2.68885	1.79317	1.74461	0.819222	0.767054	0.662481	0.255912	0.351863	0.123142	0.332554
4930429D17Rik	0	0	0	0	0	0	0	0.0394774	0	0	0	0	0.0197387	0	0	0	0	0.0406034	0	0	0	0	0	0	0.0308338
4930429F11Rik	0	0	0	0	0	0	0	0	0	0	0	0	0	0	0	0	0	0	0	0	0	0	0	0	0
4930429F24Rik	0	0	0	0	0	0	0	0	0	0	0	0	0	0	0	0.025898	0.0524939	0.0657177	0	0	0.0464746	1.08738	0.888663	0.692367	0.632135
4930430A15Rik	0	0	0	0	0	0	0	0	0	0	0	0	0	0	0	0	0	0	0	0	0	0	0	0	0
4930430D24Rik	NA	NA	NA	NA	NA	NA	NA	NA	NA	NA	NA	NA	NA	NA	NA	NA	NA	NA	NA	NA	NA	0.120411	0.177131	0	0
4930430F08Rik	0.607753	0.491498	1.07554	1.32209	0.354414	0.428352	0.778538	0.935269	0.893293	0.541312	0.518053	0.635018	1.0054	1.10769	0.447863	2.81559	3.04262	2.86905	1.97934	2.70592	2.53654	1.07721	0.667991	1.38372	2.25629
4930430F21Rik	0	0	0	0	0	0	0	0	0	0	0	0	0	0	0	0	0	0	0	0	0	0	0	0	0
4930430J02Rik	0	0	0	0	0	0	0	0	0.28453	0	0	0	0	0.142265	0	0	0.141494	0	0.273019	0	0	0	0.477039	0.143556	0
4930431F12Rik	0	0	0	0	0	0	0	0.00907995	0	0	0	0	0.00453997	0	0	0.0220817	0.0167844	0.0420252	0	0.0161793	0	0	0	0	0
4930431P03Rik	0	0	0	0	0	0	0	0	0.033427	0	0	0	0	0.0167135	0	0.114813	0.23272	0.208104	0.0320746	0.0320473	0.117734	0	0	0	0
4930432J09Rik	0	0	0	0	0	0	0.064338	0	0	0	0	0.032169	0	0	0	0	0	0	0	0	0	0	0.00999124	0	0.089726
4930432K09Rik	NA	NA	NA	NA	NA	NA	NA	NA	NA	NA	NA	NA	NA	NA	NA	NA	NA	NA	NA	NA	NA	0	0	0	0
4930432K21Rik	0.956325	1.18273	0.877139	0.433271	0.811032	0.405042	1.09923	0.514089	0.30333	0.348333	0.680683	1.14098	0.695614	0.3683	0.579682	0.756765	1.02727	1.54961	0.477973	0.857891	0.770277	0.218374	0.374798	0.256626	0.100192
4930432M17Rik	0	0	0	0	0	0	0	0	0	0	0	0	0	0	0	0	0	0	0	0	0	0	0	0	0
4930433B08Rik	0	0	0	0	0	0	0	0	0	0	0	0	0	0	0	0	0	0	0	0	0	0	0	0	0
4930433I11Rik	0	0	0	0	0	0	0	0	0	0	0	0	0	0	0	0	0	0	0	0	0	0	0	0	0
4930433N12Rik	0	0	0	0	0.0750728	0	0	0	0	0	0	0	0	0	0.0375364	0	0	0	0.0282885	0	0	0	0	0.148744	0.148669
4930434J06Rik	0	0	0	0	0	0	0	0	0	0	0	0	0	0	0	0	0	0	0	0	0	0	0	0	0
4930435E12Rik	0	0	0	0	0	0	0	0	0	0	0	0	0	0	0	0	0	0	0	0	0	0	0	0	0
4930438E09Rik	0	0	0	0	0	0	0	0	0	0	0	0	0	0	0	0	0	0	0.0582509	0	0	0.208186	0	0.490062	0
4930440C22Rik	0	0	0	0	0	0	0	0	0	0	0	0	0	0	0	0	0	0	0	0	0	0	0	0	0
4930440I19Rik	0	0	0	0	0	0	0	0	0	0	0	0	0	0	0	0	0	0	0	0	0	NA	NA	NA	NA
4930441J16Rik	0	0	0	0	0	0	0	0	0	0	0	0	0	0	0	0	0	0	0	0	0	0	0	0	0
4930441O14Rik	NA	NA	NA	NA	NA	NA	NA	NA	NA	NA	NA	NA	NA	NA	NA	NA	NA	NA	NA	NA	NA	3.50928e-09	0	0.0626445	0.242896
4930442J19Rik	0	0	0	0	0	0	0	0	0	0	0	0	0	0	0	0	0	0	0	0	0	0	0	0	0
4930442L01Rik	0	0	0	0	0	0	0	0	0	0	0	0	0	0	0	0	0	0	0	0	0	0	0	0	0
4930443G12Rik	NA	NA	NA	NA	NA	NA	NA	NA	NA	NA	NA	NA	NA	NA	NA	NA	NA	NA	NA	NA	NA	0	0	NA	NA
4930443O20Rik	0	0.215294	0	0	0	0	0	0.0452438	0	0.0409513	0	0.107647	0.0226219	0	0.0204757	0.0550146	0.111512	0.16287	0.0806877	0.0806188	0	0.288719	0.283148	0	0.176688
4930444A02Rik	NA	NA	NA	NA	NA	NA	NA	NA	NA	NA	NA	NA	NA	NA	NA	NA	NA	NA	NA	NA	NA	1.1592	1.96363	0.806198	4.37178
4930444F02Rik	0	0	0	0	0	0	0	0	0	0	0	0	0	0	0	0	0	0	0	0	0	0	0	0	0
4930444G20Rik	0	0	0	0	0.056438	0	0.00751331	0	0	0	0	0.00375665	0	0	0.028219	0.0217501	0.0220431	0.0153311	0.381027	0.0042497	0.0331764	0.0380567	0.0248816	0.0055911	0.00558831
4930444M15Rik	0	0	0	0	0	0	0	0	0	0	0	0	0	0	0	0	0	0	0	0	0.336513	0.0820229	0	0	0
4930444P10Rik	0	0	0	0	0	0	0	0	0	0	0	0	0	0	0	0	0	0	0.0649484	0.064893	0	0	0	0	0
4930445N18Rik	0	0	0	0	0	0	0	0	0	0	0	0	0	0	0	0	0.101283	0.0422658	0.0488576	0	0	NA	NA	NA	NA
4930447A16Rik	0	0	0	0	0	0	0	0	0	0	0	0	0	0	0	0	0	0	0	0	0	0	0	0	0
4930447C04Rik	0	0	0	0	0	0	0.0552096	0	0	0	0	0.0276048	0	0	0	0	0	0.0168985	0	0	0	0	0	0.205424	0.0513303
4930447F24Rik	5.55568	0.385318	0.594114	0	0.670667	2.52769	1.78297	2.30778	0	0.549691	4.04169	1.08414	1.45095	0	0.610179	4.9108	5.90733	3.0916	1.19097	0.324644	0.563206	NA	NA	NA	NA
4930447J18Rik	0	0	0	0	0	0	0	0	0	0	0	0	0	0	0	0	0	0	0	0	0	0	0	0	0
4930447K03Rik	1.04869	1.09039	2.00055	0.271977	0.497803	0.986609	1.07925	1.67914	0.363049	0.775215	1.01765	1.08482	1.83984	0.317513	0.636509	0.383687	0.388856	0.272384	0.803911	0.120484	0.196724	0.431268	0.70491	0.0422704	0.237652
4930447M23Rik	0	0	0	0	0	0	0	0	0	0	0	0	0	0	0	0	0.0323734	0	0	0	0	NA	NA	NA	NA
4930447N08Rik	0	0	0	0	0	0	3.25e-09	1.48e-08	0	0	0	1.62556e-09	7.37745e-09	0	0	0	0	0	0	0	0	0	0	0	0
4930448C13Rik	0	0	0	0	0	0	0	0	0	0	0	0	0	0	0	0	0	0	0	0	0	0	0	0	0
4930448F12Rik	0	0	0	0	0	0	0	0	0	0	0	0	0	0	0	0	0	0	0	0	0	0	0	0	0
4930448H16Rik	0	0	0	0	0	0	0	0	0	0	0	0	0	0	0	0.0851833	0	0.0720524	0	0.0832187	0.0764316	0	0	0	0
4930448I06Rik	0	0	0	0	0	0	0	0	0	0	0	0	0	0	0	0	0	0	0	0	0	0	0	0	0
4930448I18Rik	0	0	0	0	0	0	0	0	0	0	0	0	0	0	0	0	0	0	0	0	0	0	0	0	0
4930448K20Rik	0	0	0	0	0	0.0130925	0	0.00912238	0.0113032	0.0412845	0.00654625	0	0.00456119	0.0056516	0.0206423	0	0	0	0.0338934	0.0406373	0.00497641	0.00882018	0	0.0285144	0
4930449E01Rik	0	0	0	0	0	0	0	0	0	0	0	0	0	0	0	0	0	0	0	0	0	0	0	0	0
4930449E18Rik	0	0	0	0	0	0	0	0	0	0	0	0	0	0	0	0	0.184464	0	0	0	0	0	0.620936	0	0
4930449I24Rik	0	0	0	0	0	0	0	0	0	0	0	0	0	0	0	0	0	0	0	0	0	0	0	0.000120454	0
4930451C15Rik	NA	NA	NA	NA	NA	NA	NA	NA	NA	NA	NA	NA	NA	NA	NA	NA	NA	NA	NA	NA	NA	0.0617508	0.121143	0.535999	0.136045
4930451G09Rik	0.353842	0.413795	0.371567	0.419514	0.437668	0.140564	0.383075	0.0651841	0.202238	0.389751	0.247203	0.398435	0.218376	0.310876	0.41371	0.0389232	0.301354	0.201672	0.0888021	0.139428	0.31988	0	0	0.426909	0.229268
4930451I11Rik	0	0	0	0	0	0	0	0	0	0	0	0	0	0	0	0	0	0	0	0	0	0	0	0	0
4930452A19Rik	0	0	0	0	0	0	0	0	0	0	0	0	0	0	0	0	0	0	0	0	0	0	0	0	0
4930452B06Rik	0.512053	0.628422	0.0358468	0.0708269	0.173619	0.758148	0.647164	0.154072	0.109089	0.0597664	0.6351	0.637793	0.0949594	0.0899579	0.116693	0.562038	0.596734	0.294296	0.0523376	0.0392197	0.396231	0	0.0918798	0	0.0343824
4930452G13Rik	0	0.202996	0	0	0	0	0	0	0	0	0	0.101498	0	0	0	0	0	0	0	0	0	0	0	0	0
4930452N14Rik	0	0	0	0	0	0	0	0	0	0	0	0	0	0	0	0	0	0	0	0	0	0	0	0.0856625	0
4930453H23Rik	0	0	0	0	0	0	0	0	0	0	0	0	0	0	0	0.0224966	0	0	0	0	0	0	0	0	0
4930453L07Rik	0	0	0	0	0	0	0	0	0	0	0	0	0	0	0	0	0.0279682	0	0	0	0	0	0	0	0
4930453N24Rik	5.04003	5.98292	7.26367	6.12215	8.7232	11.6717	5.9683	5.43818	7.73459	7.42088	8.35586	5.97561	6.35093	6.92837	8.07204	35.6789	28.4567	24.6241	24.3003	23.8758	27.8075	9.02758	5.08378	18.2371	19.9813
4930455B14Rik	0	0	0	0	0	0	0	0	0	0	0	0	0	0	0	0	0	0	0	0	0	0	0	0	0
4930455C13Rik	0	1.16e-272	0	0	0	1.96e-292	0	1.32e-265	0.120262	0	9.8025e-293	5.7781e-273	6.5788e-266	0.060131	0	0.0555598	0.0523263	0.0866304	0.0534906	0.0536973	0.0957167	0	0.259866	0.161706	0
4930455D15Rik	0	0	0	0	0	0	0	0	0	0	0	0	0	0	0	0	0.0244626	0.0204167	0	0	0	0	0	0	0
4930455F16Rik	0	0	0	0	0	0	0	0	0	0	0	0	0	0	0	0	0	0	0	0	0	0	1.32531e-05	0.143571	0
4930455F23Rik	NA	NA	NA	NA	NA	NA	NA	NA	NA	NA	NA	NA	NA	NA	NA	NA	NA	NA	NA	NA	NA	2.18535	2.28145	3.29326	4.73558
4930455H04Rik	0	0	0	0	0	0	0	0	0	0	0	0	0	0	0	0	0	0	0	0	0	2.48387e-09	2.22312e-09	0.0950236	0.0810403
4930455J16Rik	0	0	0	0	0	0	0	0	0	0	0	0	0	0	0	0	0	0	0	0	0	0	0	0	0
4930456L15Rik	0	0	0	0	0	0	0.0480029	0	0	0	0	0.0240015	0	0	0	0	0	0.0293854	0	0	0	0.121514	0	0	0
4930459C07Rik	0	0	0	0	0	0	0	0.111776	0	0	0	0	0.055888	0	0	0.0339787	0.0344365	0.0574819	0.0664469	0.0663901	0.213414	NA	NA	NA	NA
4930459L07Rik	0	0	0	0	0	0	0	0	0	0	0	0	0	0	0	0	0	0	0	0	0	0	0	0	0
4930461G14Rik	0	0	0	0	0	0.139658	0	0	0	0.0880763	0.069829	0	0	0	0.0440381	0.118323	0	0	0	0	0.0530833	0	0	0	0
4930463O16Rik	0	0	0.0429651	0	0	0	0.0221621	0	0	0	0	0.0110811	0.0214825	0	0	0.0160392	0.0162552	0.0135668	0	0	0	NA	NA	NA	NA
4930465A12Rik	NA	NA	NA	NA	NA	NA	NA	NA	NA	NA	NA	NA	NA	NA	NA	NA	NA	NA	NA	NA	NA	0	0	0	0
4930465K10Rik	0	0	0	0	0	0	0.222549	0	0	0.191825	0	0.111274	0	0	0.0959125	0	0	0.0272471	0	0.125879	0.0289031	0	0	0	0.0827646
4930465M20Rik	0	0	0	0	0	0	0	0	0	0	0	0	0	0	0	0	0	0	0	0	0	0	0	0	0
4930467D21Rik	0	0	0	0	0	0	0	0	0	0	0	0	0	0	0	0	0	0	0	0	0	0	0	0	0
4930467E23Rik	0	0	0	0	0	0	0.000197612	0.00023523	0	0.00020777	0	9.8806e-05	0.000117615	0	0.000103885	0	0	0	0.000135909	0.000139717	0.000123383	0.0500237	0.098117	0.188519	0.000178309
4930467K11Rik	0	0	0	0	0	0	0	0	0	0	0	0	0	0	0	0	0	0.0555363	0	0	0.0589117	0	0	0	0
4930468A15Rik	0	0	0	0	0	0	0	0	0	0	0	0	0	0	0	0	0	0	0	0	0	0	0	0	0
4930469G21Rik	0	0	0	0	0	0	0	0	0	0	0	0	0	0	0	0	0	0	0.0444287	0	0	0	0	0	0
4930470H14Rik	0	0	0	0	0	0	0.00384749	0	0	0	0	0.00192374	0	0	0	0.011138	0	0.0502459	0.0108904	0.00435246	0.0139912	0	0	0.0249049	0.020032
4930470O06Rik	0	0	0	0	0	0	0	0	0	0	0	0	0	0	0	0	0	0	0	0	0	NA	NA	NA	NA
4930470P17Rik	0	0	0	0	0	0	0	0	0	0	0	0	0	0	0	0	0	0	0	0	0	0	0	0	0
4930471C04Rik	0	0	0	0	0	0	0	0	0	0.0767527	0	0	0	0	0.0383763	0	0	0	0	0	0	0	0	0.0530116	0.132463
4930471G03Rik	0	0	0	0	0	0	0	0	0	0	0	0	0	0	0	0	0	0	0	0	0	0	0	0	0
4930471I20Rik	NA	NA	NA	NA	NA	NA	NA	NA	NA	NA	NA	NA	NA	NA	NA	NA	NA	NA	NA	NA	NA	0.331415	0.312294	0.174315	9.40959e-08
4930471M09Rik	0	0	0	0	0	0	0.0518616	0	0	0	0	0.0259308	0	0	0	0.0375332	0.0380389	0.0317475	0	0.110003	0.0673541	0	0	0.0385933	0
4930471M23Rik	NA	NA	NA	NA	NA	NA	NA	NA	NA	NA	NA	NA	NA	NA	NA	NA	NA	NA	NA	NA	NA	6.88218	5.32632	NA	NA
4930473A02Rik	2.38e-219	6.63e-151	3.76e-203	1.72e-177	1.51e-183	2.51e-169	0.0451496	4.77e-218	0.0651376	8e-173	1.2535e-169	0.0225748	1.8814e-203	0.0325688	3.999e-173	0.286828	0.224526	0.330442	0.218714	0.22106	0.116123	0.227815	0.459551	0.132635	4.03085e-216
4930473O22Rik	0	0	0	0	0	0	0	0	0	0	0	0	0	0	0	0	0	0	0	0	0	0	0	0	0
4930474G06Rik	0	0	0	0	0	0	0	0	0	0	0	0	0	0	0	0	0	0	0	0	0	0	0	0	0
4930474H20Rik	0	0	0	0	0	0	0	0	0	0	0	0	0	0	0	0	0	0	0	0	0	0	0	0	0
4930474M22Rik	0.425042	0.217349	0	0	0	0	0	0	0	0	0.212521	0.108674	0	0	0	0	0	0	0	0	0	0	0	0.0856625	0.214049
4930474N05Rik	0	0	0	0	0	0	0	0	0	0	0	0	0	0	0	0	0	0	0	0	0	0	0	0	0
4930474N09Rik	0	0	0	0	0	0	0	0	0	0	0	0	0	0	0	0	0	0.0889724	0	0.137014	0	0	0	0	0
4930477N07Rik	0	0	0	0	0	0	0	0	0	0	0	0	0	0	0	0	0.0842218	0	0	0	0	NA	NA	NA	NA
4930478L05Rik	0	0	0	0	0	0	0	0	0	0	0	0	0	0	0	0.061007	0	0.0688039	0.0198837	0	0.0182464	0	0.0697942	0	0
4930478P22Rik	0	0	0	0	0	0	0	0	0	0	0	0	0	0	0	0	0	0	0	0	0	0	0	0	0
4930479D17Rik	0	0	0	0	0	0	0	0	0	0	0	0	0	0	0	0	0.0644319	0.215101	0	0.0621092	0.114087	0	0.435691	0.130742	0.163346
4930479M11Rik	NA	NA	NA	NA	NA	NA	NA	NA	NA	NA	NA	NA	NA	NA	NA	NA	NA	NA	NA	NA	NA	0	0	0	0
4930480E11Rik	0	0	0	0	0	0	0	0	0	0	0	0	0	0	0	0	0	0	0	0	0	0	0	0	0
4930480G23Rik	0	0	0	0	0	0	0	0	0	0	0	0	0	0	0	0	0	0	0.0315861	0	0	0	0	0	0.581
4930480K15Rik	0	0	0	0	0	0	0	0	0	0	0	0	0	0	0	0	0.0173144	0.0289015	0.00278408	0	0.015329	0	0	0.0175668	0
4930480M12Rik	0	0	0	0	0	0	0	0	0	0	0	0	0	0	0	0	0	0	0	0	0	0	0	0	0
4930481A15Rik	0.202941	0.249061	0.34097	1.34739	1.73401	0.150237	0.0879392	0	0.518818	0.544686	0.176589	0.1685	0.170485	0.933104	1.13935	0.222672	0.225672	0.134449	0.995426	1.5843	0.428284	1.16182	0.149695	21.1517	3.51465
4930482G09Rik	0	0	0	0	0	0	0	0	0	0	0	0	0	0	0	0	0	0	0	0	0	NA	NA	NA	NA
4930483J18Rik	0	0	0.102576	0	0.198724	0.180786	0	0	0.0780392	0.171021	0.090393	0	0.051288	0.0390196	0.184872	0.191461	0.0388081	0.0323895	0.037441	0	0.137432	0	0	0.196868	0
4930483K19Rik	0.267717	0.0909944	0.284847	0.376047	1.0054	0.328563	0.484272	0.285812	0.990174	1.14141	0.29814	0.287633	0.28533	0.68311	1.0734	0.0685988	0.388528	0.087475	0.243398	0.440977	0.371662	0.396574	0.253653	0.0724723	0.0910916
4930483O08Rik	0	0	0	0	0	0	0.0570092	0	0	0.122847	0	0.0285046	0	0	0.0614235	0	0	0.0348987	0	0	0.0370197	0	0	0	0
4930486F22Rik	0	0	0	0	0	0	0	0	0	0	0	0	0	0	0	0.189816	0	0	0	0	0	0	0	0	0
4930486I03Rik	0	0	0	0	0	0	0	0	0	0	0	0	0	0	0	0	0	0	0	0	0	0	0	0	0
4930486L24Rik	0.223116	0.152123	0	0.0771532	0.378253	0.619399	0.0805679	0.0959053	0.237665	0.13021	0.421258	0.116345	0.0479526	0.157409	0.254231	2.97373	2.83652	1.25767	1.93842	1.28168	0.444703	1.12195	2.60072	0.329755	2.69665
4930487D11Rik	0	0	0	0	0	0	0	0	0	0	0	0	0	0	0	0	0	0	0	0	0	0	0	0	0
4930487H11Rik	0	0.385998	0.26422	0	0.127971	0.23284	0.204434	0.243351	0	0.146842	0.11642	0.295216	0.253785	0	0.137406	0.147953	0.199928	0.125146	0.0482213	0	0.0442507	0.689627	0.67632	0.507105	0.316783
4930488B22Rik	0	0	0	0	0	0	0	0	0	0	0	0	0	0	0	0	0	0	0	0	0	0	0	0	0
4930488L21Rik	0	0	0	0	0	0	0	0	0.0418939	0.0306032	0	0	0	0.0209469	0.0153016	0	0.0208334	0	0.0602985	0.0200823	0.0184445	0.143879	0.0705513	0	0
4930500F04Rik	0	0	0	0	0	0	0	0	0	0	0	0	0	0	0	0	0	0	0	0	0	0	0	0	0
4930500J02Rik	0	0	0	0	0	0	0.0689427	0	0	0	0	0.0344713	0	0	0	0.180278	0.202302	0.666079	0	0	0.0808774	0	0	0.102609	0.128241
4930500L23Rik	0	0	0	0	0	0	0	0	0	0	0	0	0	0	0	0	0	0	0	0	0	0	0	0	0
4930502A04Rik	0	0	0	0	0	0	0	0	0	0	0	0	0	0	0	0	0	0	0	0	0	0	0	0	0
4930502E09Rik	0	0	0	0	0	0	0	0	0.12604	0	0	0	0	0.06302	0	0	0.188035	0.156935	0.120941	0.120838	0.277456	0	0	0	0.0794502
4930502E18Rik	0	0	0	0	0	0	0	0	0	0	0	0	0	0	0	0	0.0345743	0	0	0	0.428537	0	0	0	0.131478
4930503B20Rik	0	0	0	0	0	0	0	0	0	0	0	0	0	0	0	0	0	0	0	0	0	0	0	0.0432618	0
4930503E14Rik	0	0	0	0	0	0	0	0	0	0	0	0	0	0	0	0.408344	0.700354	1.26203	0.890673	0.521673	0.746874	0	0	0	0
4930503E24Rik	32.6123	25.5563	22.7632	37.7063	18.5644	42.7917	26.1945	20.8288	35.1285	17.9314	37.702	25.8754	21.796	36.4174	18.2479	10.5655	8.47447	5.84724	9.35659	10.0269	6.6089	6.38909	9.01033	5.09051	4.88631
4930503H13Rik	0	0	0	0	0	0	0	0	0	0	0	0	0	0	0	0	0	0.133743	0	0	0	0	0	0	0
4930503L19Rik	0.958193	0.809531	1.57491	0.0432184	0.254261	0.809586	0.88006	0.564089	0.133131	0.0729388	0.883889	0.844796	1.0695	0.0881747	0.1636	9.68439	7.39839	5.70508	2.34732	1.89859	1.83167	2.17215	2.91505	1.44415	2.18193
4930503O07Rik	0	0	0	0	0	0	0	0	0	0	0	0	0	0	0	0	0	0	0	0	0	0	0	0	0
4930504O13Rik	0	0	0	0	0	0	0	0	0	0	0	0	0	0	0	0	0	0	0	0	0	0	0	0	0
4930505A04Rik	0	0.246627	0	0.125083	0.122648	0.111577	0.0653098	0	0	0	0.0557885	0.155968	0	0.0625415	0.061324	0.0472659	0.0958054	0.03998	0.0462153	0	0	0	0.162059	0.0486009	0.667929
4930505G20Rik	0	0	0	0	0	0	0	0	0	0	0	0	0	0	0	0	0	0	0	0	0	0	0	0	0
4930506A18Rik	0	0	0	0	0	0	0	0	0	0	0	0	0	0	0	0	0	0	0	0	0	NA	NA	NA	NA
4930506C21Rik	0.414429	0.122302	0.5161	0.257529	1.12544	7.62e-08	0.266873	0.403292	0.802438	0.72401	0.207215	0.194587	0.459696	0.529984	0.924725	0.195836	0.634134	0.911709	0.734109	1.13455	1.87715	0	0	2.43769	1.6837
4930506M07Rik	0.0732064	0	0	0	0	0.0225795	0.0396526	0.0157325	0	0.0427229	0.0478929	0.0198263	0.00786625	0	0.0213615	0.0956603	0.252069	0.0970975	0.00935245	0	0.0944156	3.81667	1.75074	4.82728	4.86772
4930507D05Rik	0.368596	0.327968	9.21e-09	0.24047	0.185547	0.212635	0.222092	0.449888	0.521223	0.271584	0.290616	0.27503	0.224944	0.380846	0.228566	0.215	0.217314	0.259804	0.4502	0.143665	0.190965	0.25071	0.0611369	0.0904773	0.091626
4930507D10Rik	0	0	0	0	0	0	0	0	0	0	0	0	0	0	0	0	0	0	0	0	0	NA	NA	NA	NA
4930509E16Rik	0	0	0	0	0	0	0	0	0	0	0	0	0	0	0	0.0690589	0	0.116827	0	0.134932	0.247855	0.120776	0.118446	0.0355047	0.0887175
4930509J09Rik	0	0	0	0	0	0	0	0	0	0	0	0	0	0	0	0	0	0	0	0	0	0	0	0	0
4930509K18Rik	0	0	0	0	0	0	0	0	0	0	0	0	0	0	0	0	0	0	0	0	0	0	0	0	0
4930511A02Rik	0	0	0	0	0	0	0	0	0	0	0	0	0	0	0	0	0	0	0	0	0	0	0	0	0
4930511E03Rik	0	0	0	0.93399	0.828582	0	0	0	0.924779	1.07587	0	0	0	0.929384	0.952226	0	0	0.0852937	0	0.49256	10.7819	0.117647	0.346131	0.0345619	0.777254
4930511M06Rik	0	0	0.00745669	0.00920932	0	0	0.0423382	0.00381461	0	0	0	0.0211691	0.00563565	0.00460466	0	0.202795	0.339998	0.0793417	0.0364451	0.0198799	0.0934675	0	0	0.00715887	0.0289254
4930511M11Rik	NA	NA	NA	NA	NA	NA	NA	NA	NA	NA	NA	NA	NA	NA	NA	NA	NA	NA	NA	NA	NA	0.0960044	0	0	0
4930512B01Rik	8.39e-08	3.41e-09	2.68e-08	8.94e-09	2.23e-08	4.99e-08	0.0400725	3.38e-77	8.6e-08	3.64e-08	6.68625e-08	0.0200363	1.34044e-08	4.74811e-08	2.93257e-08	0.183032	0.0308923	2.0819e-86	0.210191	0.119815	0.0269444	1.86614e-129	1.94487e-69	6.73651e-09	0.160999
4930513D17Rik	0	0	0	0	0	0	0	0	0	0	0	0	0	0	0	0	0	0	0	0	0	0	0	0	0
4930513N10Rik	0.807878	0.599159	0.795338	0.422737	0.173277	0.621393	1.06456	1.08865	0.627815	0.24181	0.714635	0.831859	0.941994	0.525276	0.207543	0.73601	0.959008	0	1.13531	1.21772	0.367145	0.249041	0.251327	0.0404536	0.305887
4930513O06Rik	0	0	0	0	0	0	0	0	0	0	0	0	0	0	0	0	0	0	0	0	0	0	0	0	0
4930515B02Rik	0	0	0	0	0	0	0	0	0	0	0	0	0	0	0	0	0	0	0	0	0	0	0	0	0
4930515G01Rik	0.332148	0.849232	0.435982	0.43071	0.844645	0.691564	1.07946	0.481856	0.0663386	0.38768	0.511856	0.964346	0.458919	0.248524	0.616162	0.651019	0.791748	0.798465	0.254619	0.922207	0.730167	0.341593	0.670004	0.401644	0.919975
4930515G16Rik	0	0	0	0	0	0	0	0	0	0	0	0	0	0	0	0	0	0	0	0	0	0	0	0	0
4930515L03Rik	0	0	0	0	0	0	0	0	0	0	0	0	0	0	0	0	0	0	0	0	0	0	0	0	0
4930515L19Rik	0	0	0	0	0	0	0	0	0	0	0	0	0	0	0	0	0	0	0	0	0	0	0	0	0
4930517E11Rik	0	0	0	0	0	0	0	0	0	0	0	0	0	0	0	0	0	0	0	0	0	0	0	0	0
4930518P08Rik	0	0	0	0	0	0	0	0	0	0	0	0	0	0	0	0	0	0	0	0	0.0623428	0	0	0	0
4930519D14Rik	0	0	0	0	0	0	0	0	0	0	0	0	0	0	0	0	0	0	0	0	0	0	0	0	0
4930519F09Rik	0.583505	0.69843	0.272326	2.43475	2.37415	0.689951	0.540811	0.508601	2.27903	1.77833	0.636728	0.619621	0.390464	2.35689	2.07624	2.92639	1.99861	1.53887	4.21361	3.35297	3.82425	9.38183	2.57273	6.88172	3.30854
4930519F16Rik	0	0	0	0	0	0	0.0489509	0	0	0	0	0.0244754	0	0	0	0.10628	0.215424	0.0599314	0.0346392	0	0	0	0	0	0
4930519F24Rik	0	0	0	0	0	0	0	0	0	0	0	0	0	0	0	0	0	0	0	0	0	0	0	0	0
4930519G04Rik	0.00364075	0	0	0	0	0	0.00416175	0	0	0	0.00182037	0.00208087	0	0	0	0	0.00188035	0.00406057	0.00382979	0.00427967	0.0033631	0	0	0.0107273	0.00297938
4930519H02Rik	0	0	0	0	0	0	0	0	0	0	0	0	0	0	0	0	0	0	0	0	0	0	0	0	0
4930520O04Rik	1.2691	0.872143	0.923174	0.202664	0.0993552	0.994319	0.846504	0.566839	0.137131	0.171018	1.13171	0.859324	0.745007	0.169898	0.135187	1.03389	0.73735	0.809269	0.973464	0.29927	0.515368	0.133911	0.394003	0.511855	0.688693
4930520P13Rik	0	0	0	0	0	0	0	0	0	0	0	0	0	0	0	0	0	0	0	0	0	0	0	0	0
4930521E06Rik	0	0	0	0	0	0	0	0	0	0	0	0	0	0	0	0	0.049199	0.0821237	0.0474659	0.0948507	0.0435575	0	0	0	0
4930522H14Rik	0	0	0	0	0	0	0	0	0	0	0	0	0	0	0	0	0	0	0	0	0.0933514	0	0	0	0
4930522O17Rik	0	0	0	0	0	0	0	0	0	0	0	0	0	0	0	0	0	0	0	0	0	0	0	0	0
4930523C07Rik	0.485901	1.02138	0.909164	3.64032	2.34201	0.265899	1.04148	0.969836	3.71864	1.97018	0.3759	1.03143	0.9395	3.67948	2.1561	1.80264	3.53369	6.17473	10.5091	4.61281	4.62257	0.438786	0.967683	4.59604	11.2007
4930523O13Rik	0	0	0	0	0	0	0	0	0	0	0	0	0	0	0	0	0	0	0	0	0	0	0	0	0
4930524B15Rik	0	0	0	0	0	0	0	0	0	0	0	0	0	0	0	0	0	0.0164267	0	0	0	0	0	0	0
4930524B17Rik	0	0	0	0	0	0	0	0	0	0	0	0	0	0	0	0	0	0	0	0	0	NA	NA	NA	NA
4930524C18Rik	0	0	0	0	0	0	0	0	0	0	0	0	0	0	0	0	0	0	0	0	0	0	0	0	0
4930524L23Rik	NA	NA	NA	NA	NA	NA	NA	NA	NA	NA	NA	NA	NA	NA	NA	NA	NA	NA	NA	NA	NA	0	0.0738079	0.167971	0.141922
4930524N10Rik	0	0	0	0	0	0	0	0	0	0	0	0	0	0	0	0	0	0	0	0	0	0	0	0	0
4930524O05Rik	0	0	0	0	0	0.069793	0.000340274	0	0	0	0.0348965	0.000170137	0	0	0	0.0474517	0	1.07006e-06	0	0	0	0	0	0	0
4930524O08Rik	0	0	0	0	0	0	0	0	0	0	0	0	0	0	0	0	0	0	0	0	0	0	0	0	0
4930525D18Rik	0	0	0.124712	0	0	0	0	0	0	0	0	0	0.062356	0	0	0	0	0.0393793	0.045521	0.0454821	0.0417727	0	0	0	0
4930525G20Rik	0	0.0319519	0	0	0	0	0	0.010072	0	0	0	0.0159759	0.005036	0	0	0.0122471	0.0124121	0.0569759	0.00598745	0.0119647	0.0439555	0.12862	0.0420461	0.12593	0.637204
4930525M21Rik	NA	NA	NA	NA	NA	NA	NA	NA	NA	NA	NA	NA	NA	NA	NA	NA	NA	NA	NA	NA	NA	0.191796	0.282143	0	0
4930526D03Rik	NA	NA	NA	NA	NA	NA	NA	NA	NA	NA	NA	NA	NA	NA	NA	NA	NA	NA	NA	NA	NA	0.232515	0	0	0
4930526I15Rik	NA	NA	NA	NA	NA	NA	NA	NA	NA	NA	NA	NA	NA	NA	NA	NA	NA	NA	NA	NA	NA	0.796107	2.02134e-06	2.13292	4.78887
4930526L06Rik	0	0	0	0	0	0	0	0	0	0	0	0	0	0	0	0	0.0423268	0.0706525	0.0816716	0.0408009	0	0	0	0	0.0536529
4930527F14Rik	0	0	0	0	0	0	0	0	0	0	0	0	0	0	0	0	0	0	0	0	0	0	0	0.0661109	0.0825973
4930527G23Rik	0	0	0	0	0	0	0	0	0	0	0	0	0	0	0	0	0	0	0	0	0	0	0	0	0
4930528A17Rik	0.235969	0.047207	0.354594	0.194925	0.192482	0.257841	0.535006	0.626628	0.429204	0.526081	0.246905	0.291106	0.490611	0.312065	0.359281	0.236872	0.221313	0.278132	0.141752	0.324326	0.243178	2.76448e-09	0.138178	0.0735823	0.189562
4930528D03Rik	0	0	0.0294024	0	0	0	0.0216661	0	0	0	0	0.0108331	0.0147012	0	0	0	0.00417149	0.00928416	0	0.0750607	0.0411523	0	0	0.0141076	0.0105754
4930528P14Rik	0	0	0	0	0	0	0	0	0	0	0	0	0	0	0	0	0	0	0	0	0	0	0	0	0
4930529C04Rik	0.166386	0.171502	0.164658	0.162668	0.111207	0.137445	0.0646439	0.128344	0.232846	0.150737	0.151916	0.118073	0.146501	0.197757	0.130972	0.413202	0.226689	0.215482	0.361779	0.433126	0.294761	0.113576	0.172353	0.142034	0.175918
4930529F24Rik	NA	NA	NA	NA	NA	NA	NA	NA	NA	NA	NA	NA	NA	NA	NA	NA	NA	NA	NA	NA	NA	0	0	0	0
4930529K09Rik	0	0	0	0	0	0	0	0	0	0	0	0	0	0	0	0	0	0	0	0	0	0	0	0	0
4930529L06Rik	0	0	0	0	0	0	0	0	0	0	0	0	0	0	0	0	0	0	0	0	0	0	0	0	0
4930529M08Rik	NA	NA	NA	NA	NA	NA	NA	NA	NA	NA	NA	NA	NA	NA	NA	NA	NA	NA	NA	NA	NA	0	0	0	0
4930532M18Rik	0	0	0	0	0	0	0	0	0	0	0	0	0	0	0	0	0	0	0	0	0	NA	NA	NA	NA
4930533B01Rik	0	0	0	0	0	0	0.0570783	0	0	0	0	0.0285391	0	0	0	0.0413086	0	0	0	0	0	0	0	0	0
4930533P14Rik	0	0	0	0	0	0	0	0	0	0	0	0	0	0	0	0	0	0	0	0	0	0	0	0	0
4930538K18Rik	0.0668785	0.136795	0.140457	0	0	0	0.108675	0.043121	0.106859	0.11709	0.0334392	0.122735	0.091789	0.0534295	0.058545	0.0786502	0.21256	0.24393	0.205072	0.153673	0.235232	0.642102	0.629712	0.620016	0.336797
4930539C22Rik	0	0	0	0	0	0	0	0	0	0	0	0	0	0	0	0	0	0	0	0	0	0	0	0	0
4930539E08Rik	0	0	0	0	0.12088	0	0	0	0	0.09247	0	0	0	0	0.106675	0.00414085	0.0314748	0	0	0.00252835	0.0152628	0.0271843	0.0799792	0.00798339	0.0626953
4930539J05Rik	5.63574	5.15705	4.36066	7.07733	3.31889	6.5876	6.26592	5.54624	7.10909	5.71246	6.11167	5.71148	4.95345	7.09321	4.51567	14.0694	13.434	11.7039	8.98162	11.3594	12.2066	24.3282	19.8823	4.30416	7.76753
4930539M17Rik	0	0	0	0	0	0	0	0	0	0	0	0	0	0	0	0	0	0	0	0	0	0	0	0	0
4930539N22Rik	0	0	0	0	0	0	0	0	0	0	0	0	0	0	0	0	0	0	0	0	0	0	0	0	0
4930540M03Rik	0	0	0	0	0	0	0	0	0	0	0	0	0	0	0	0	0	0	0	0	0	0	0	0	0
4930542C21Rik	0	0	0	0	0	0	0	0	0	0	0	0	0	0	0	0	0	0	0	0.0443907	0.0407703	0	0	0	0
4930542D17Rik	0	0	0	0	0	0	0	0	0	0	0	0	0	0	0	0	0	0	0.028777	0	0	0	0	0	0
4930542H20Rik	NA	NA	NA	NA	NA	NA	NA	NA	NA	NA	NA	NA	NA	NA	NA	NA	NA	NA	NA	NA	NA	0	0	0	0
4930543E12Rik	0	0	0	0	0	0	0	0	0	0	0	0	0	0	0	0	0	0	0	0	0.0250041	0	0.0956161	0	0
4930544D05Rik	0	0	0	0	0	0	0	0	0	0	0	0	0	0	0	0	0	0	0	0	0	0.265037	0	0.0780335	0
4930544G11Rik	0	0	0	0	0	0	0	0	0	0	0	0	0	0	0	0	0	0	0	0	0	0	0	0	0
4930544M13Rik	0	0	0	0	0	0	0	0	0	0	0	0	0	0	0	0	0	0	0	0	0.0253145	0	0	0	0
4930545E07Rik	0	0	0	0	0	0	0	0	0	0	0	0	0	0	0	0	0	0	0	0	0	0	0	0	0
4930545H06Rik	0	0	0	0	0	0	0	0	0	0	0	0	0	0	0	0	0	0	0	0	0	0	0	0	0
4930545L23Rik	0.0756711	0.0773901	0	0	0.0384861	0	0	0	0	0	0.0378356	0.0386951	0	0	0.0192431	0	0	0	0	0.0434691	0.0399239	0	0.0509146	0	0
4930546C10Rik	0	0	0	0	0	0	0	0	0	0	0	0	0	0	0	0	0	0.0136116	0	0	0	0	0	0	0
4930546K05Rik	0	0	0	0	0	0	0	0	0	0	0	0	0	0	0	0	0	0.0086447	0	0	0.0091701	0	0.0350897	0	0.0131294
4930547C10Rik	NA	NA	NA	NA	NA	NA	NA	NA	NA	NA	NA	NA	NA	NA	NA	NA	NA	NA	NA	NA	NA	0	0	0	0
4930547E08Rik	0	0	0	0	0	0	0	0.16629	0	0	0	0	0.083145	0	0	0	0	0.256549	0.0988537	0	0	0.352751	0	0.103957	0
4930547E14Rik	0	0	0	0	0	0	0	0	0	0	0	0	0	0	0	0	0	0	0	0	0	0	0	0	0
4930548G14Rik	0	0	0	0	0	0	0	0	0	0	0	0	0	0	0	0	0	0	0	0	0	0	0	0	0
4930548H24Rik	0	0	0	0	0	0	0	0.183342	0	0	0	0	0.091671	0	0	0.111469	0.0847278	0.0707144	0.0544954	0.0272245	0	0	0	0.0573085	0.0357999
4930548J01Rik	0	0	0	0	0	0	0	0	0	0	0	0	0	0	0	0	0	0	0	0	0	0	0	0	0
4930548K13Rik	0	0	0	0	0	0	0	0	0	0	0	0	0	0	0	0	0	0	0	0	0	0	0	0	0
4930549C01Rik	0	0	0	0	0	0	0	0	0	0	0	0	0	0	0	0	0	0	0	0	0	0	0	0	0
4930549G23Rik	0.569178	2.44e-28	2.78e-06	4.58e-24	4.02e-12	2.74e-15	0.200772	4.27e-11	4.89e-06	4.79e-12	0.284589	0.100386	1.38874e-06	2.44385e-06	4.40389e-12	0.280715	0.410246	0.616888	1.69034e-09	0.259904	0.743085	0.338038	5.07803e-11	0.215558	0.189585
4930550C14Rik	0	0	0	0.174619	0	0	0	0	0	0	0	0	0	0.0873095	0	0.032992	0.267492	0.0837192	0	0.0644623	0.0296025	0.115406	0.339536	0.135696	0.847674
4930550L24Rik	0	0	0	0	0	0	0.0344246	0	0	0	0	0.0172123	0	0	0	0.0249137	0.0252493	0	0.0730798	0.0486782	0.223541	0	0	0	0
4930552N02Rik	0	0	0	0	0	0	0	0	0	0	0	0	0	0	0	0	0	0	0	0	0	0	0	0	0
4930552P12Rik	0	0	0	0.0787063	0	0	0.0821899	0	0	0	0	0.0410949	0	0.0393532	0	0.0148706	0.0150709	0.176096	0.0727002	0.0290553	0.0133428	0	0.0510478	0.0458718	0.0573111
4930553C11Rik	0	0	0	0	0	0	0	0	0	0	0	0	0	0	0	0	0	0	0	0	0	NA	NA	NA	NA
4930553E22Rik	0	0	0	0	0	0	0	0	0	0	0	0	0	0	0	0	0	0	0	0	0	0	0	0	0
4930554C24Rik	0	0	0	0	0	0	0	0	0	0	0	0	0	0	0	0	0	0	0	0	0	0	0	0	0
4930554I06Rik	0	0.461785	0	0	0	0	0	0	0	0	0	0.230893	0	0	0	0	0.179386	0	0	0	0.0794083	NA	NA	NA	NA
4930555B11Rik	0	0	0	0	0	0	0	0	0	0	0	0	0	0	0	0	0	0	0	0	0	0	0	0	0
4930555G01Rik	0	0	0	0	0	0.00360276	0.0103332	0	0	0.00681631	0.00180138	0.0051666	0	0	0.00340815	0.173619	0.120575	0.091931	0.126039	0.0652984	0.0222493	0.108967	0.0125723	0.00993888	0.0422551
4930555K05Rik	0	0	0	0	0	0	0	0	0	0	0	0	0	0	0	0	0	0	0	0	0	NA	NA	NA	NA
4930556C24Rik	0	0	0	0	0	0	0	0	0	0	0	0	0	0	0	0.0484759	0.098258	0	0	0	0	0	0	0	0
4930556G01Rik	0	0	0	0	0	0	0	0	0	0	0	0	0	0	0	0	0	0.0419582	0.0970041	0	0	0	0	0	0
4930556J02Rik	0	0	0	0	0	0	0	0	0	0	0	0	0	0	0	0	0	0	0	0	0	0	0	0	0
4930556M19Rik	0.193533	0.494823	0.0508068	0.20077	0.19686	0.268636	1.1863	0.320278	0.0386536	0.0611785	0.231084	0.840561	0.185542	0.119712	0.129019	0.509764	1.38907	1.02664	0.542748	0.259407	0.370139	9.88138e-09	0	0.288282	0.444925
4930556N09Rik	0	0	0.337698	0	0	0	0.0580634	0	0	0	0	0.0290317	0.168849	0	0	0	0	0	0.0410875	0.205262	0	0	0	0	0
4930556N13Rik	0	0	0	0	0	0	0	0	0.167359	0.183382	0	0	0	0.0836795	0.091691	0.123179	0	0	0	0	0	NA	NA	NA	NA
4930557A04Rik	0	0	0	0	0	0	0	0	0	0	0	0	0	0	0	0	0	0	0	0	0	0	0	0	0
4930557F10Rik	0	0	0	0	0	0	0	0	0	0	0	0	0	0	0	0	0	0	0	0	0	NA	NA	NA	NA
4930557J02Rik	0	0	0	0	0	0	0	0	0	0	0	0	0	0	0	0	2.56816e-239	0	2.33892e-295	8.08334e-251	0	1.03697e-09	0	0	0.0502655
4930558C23Rik	0	0	0	0	0	0	0	0	0	0	0	0	0	0	0	0	0	0	0	0	0	0	0	0	0
4930558G05Rik	0	0	0	0	0	0	0	0	0	0	0	0	0	0	0	0	0	0	0	0	0	0	0	0	0
4930558J18Rik	0.188192	0	0.0494047	0	0	0.0870743	0.0509676	0.12134	0	0	0.137633	0.0254838	0.0853723	0	0	0.442635	0.411215	0.124801	0	0.234231	0.0661931	0	0	0	0
4930558K02Rik	0	0	0	0	0	0	0	0	0	0	0	0	0	0	0	0	0	0	0	0	0	0	0.150506	0	0
4930559C10Rik	0	0	0	0	0	0	0	0	0	0	0	0	0	0	0	0	0	0	0	0	0	NA	NA	NA	NA
4930562C15Rik	0	0	0	0	0	0.0221958	0.012992	0.0154652	0	0	0.0110979	0.006496	0.0077326	0	0	0.0940253	0.0190584	0.0397657	0.0367741	0.0183714	0.016873	0.0987566	0.129135	0.0386724	0.0241582
4930562F07Rik	1.15e-06	0.00116103	0.000242872	1.81639	0.0819761	0	8.57e-06	0.170515	0.265014	0.242443	5.74695e-07	0.000584799	0.0853789	1.0407	0.16221	2.39054e-06	1.03838	1.65471	0.876471	1.1368	0.141556	5.04487e-05	1.75947e-14	1.41241	1.07975
4930563D23Rik	0	0	0	0	0	0	0.0190283	0	0	0	0	0.00951415	0	0	0	0	0	0	0	0	0	0	0	0	0
4930563E18Rik	0	0	0	0	0	0	0	0	0	0	0	0	0	0	0	0	0	0	0	0	0.0453378	0.176801	0.173389	0	0.129826
4930563E22Rik	0.111866	0.262218	0.119392	0.350628	0.0568944	0.0258795	0.0766436	0.208156	0.0901394	0.0165017	0.0688727	0.169431	0.163774	0.220384	0.0366981	0.176859	0.317286	0.463156	0.152341	0.263927	0.109464	0.038688	1.05521e-09	0.0803037	0.0849412
4930563F08Rik	0	0	0	0	0	0	0	0	0	0	0	0	0	0	0	0	0	0	0	0	0	0	0	0	0
4930563H07Rik	0	0	0	0	0	0	0	0	0	0	0	0	0	0	0	0	0	0	0	0	0	NA	NA	NA	NA
4930563M20Rik	0	0	0	0	0	0	0	0	0	0	0	0	0	0	0	0	0	0	0	0	0	0	0	0	0
4930564B18Rik	0	0	0	0	0	0	0	0	0	0	0	0	0	0	0	0	0	0	0	0	0	0	0	0	0
4930564C03Rik	0	0	0	0	0	0	0	0	0	0	0	0	0	0	0	0	0	0	0	0	0	0	0	0	0
4930564D02Rik	0	0	0	0	0	0	0	0	0	0	0	0	0	0	0	0	0	0	0	0	0	0	0	0	0
4930564G21Rik	NA	NA	NA	NA	NA	NA	NA	NA	NA	NA	NA	NA	NA	NA	NA	NA	NA	NA	NA	NA	NA	0	0	0	0
4930564K09Rik	NA	NA	NA	NA	NA	NA	NA	NA	NA	NA	NA	NA	NA	NA	NA	NA	NA	NA	NA	NA	NA	0	0	0	0.00179041
4930565D16Rik	0	0	0	0	0	0	0	0	0	0	0	0	0	0	0	0	0	0	0	0	0	0	0	0	0
4930565N06Rik	0	0.0401994	0.0504477	0.045307	0.0799645	0.0363733	0.0851622	0	0.0628043	0.0688173	0.0181866	0.0626808	0.0252238	0.0540556	0.0743909	0.0462251	0.0650665	0.0912324	0.0216009	0.045159	0.0829519	0.485402	0.476036	0.697117	0.517958
4930567H12Rik	0	0	0	0	0	0	0	0	0	0	0	0	0	0	0	0	0.0459895	0.0383832	0	0	0	0	0	0	0
4930567H17Rik	0	0	0	0	0	0	0	0	0	0	0	0	0	0	0	0	0	0	0	0	0	0	0	0	0
4930567J20Rik	0	0	0	0	0	0	0	0	0	0	0	0	0	0	0	0	0	0	0	0	0	0	0	0	0
4930567K20Rik	0	0	0	0	0	0	0	0	0	0	0	0	0	0	0	0	0	0	0	0	0	0	0	0	0
4930568D16Rik	0	0	0	0	0	0	0	0	0	0	0	0	0	0	0	0	0	0	0	0	0	0	0	0	0
4930568E12Rik	0	0	0	0	0	0	0	0	0	0	0	0	0	0	0	0	0	0	0	0	0	0	0	0	0
4930568G15Rik	0	0	0	0	0	0	0	0	0	0	0	0	0	0	0	0	0	0	0	0	0	0	0	0	0
4930568K20Rik	NA	NA	NA	NA	NA	NA	NA	NA	NA	NA	NA	NA	NA	NA	NA	NA	NA	NA	NA	NA	NA	0.0843408	0.165427	0.0247841	0
4930570G19Rik	0.17997	0.843539	0	0.1867	0.213353	0.166539	0.352634	0.242897	0.167568	0.261656	0.173255	0.598086	0.121449	0.177134	0.237505	0.310258	0.421653	0.534293	0.114634	0.864212	0.446616	0.739305	0	0.612686	1.00599
4930571K23Rik	0	0	0	0	0	0	0	0	0	0	0	0	0	0	0	0	0	0	0	0	0	0	0	0	0
4930571O06Rik	0	0	0	0	0	0	0	0	0	0	0	0	0	0	0	0	0	0	0	0.0222126	0	NA	NA	NA	NA
4930572K03Rik	0	0	0	0	0	0	0	0	0	0	0	0	0	0	0	0	0	0	0	0	0	0	0	0	0
4930572O03Rik	0	0	0	0	0	0	0	0	0	0	0	0	0	0	0	0.00589831	0	0.0049891	0	0.00691474	0	0	0	0	0
4930572O13Rik	0	0	0	0	0	0	0	0	0	0	0	0	0	0	0	0	0	0.101137	0	0.0584053	0	0	0	0	0.0768025
4930573O16Rik	0	0	0	0	0	0	0	0	0	0	0	0	0	0	0	0	0	0	0	0	0	0	0	2.12048e-08	0
4930577N17Rik	0.438538	1.03895	0.451211	0.432606	0.358677	0.498946	1.12453	0.863863	0.454183	0.69915	0.468742	1.08174	0.657537	0.443395	0.528914	0.917761	1.84729	2.02384	0.539078	0.889578	0.711785	0	0	0.971442	0.910272
4930578C19Rik	0	0	0	0	0	0	0	0	0	0	0	0	0	0	0	0	0	0	0	0	0	5.75794	5.64683	1.18648	1.48236
4930578E11Rik	0.00449097	0.00918597	0	0.0132002	0.0114204	0	0.00423854	0	0	0.00201608	0.00224549	0.00671226	0	0.0066001	0.00671824	0.0239204	0.0058199	0.0208669	0.00628555	0.00831277	0.0356986	0	0	0.0279524	0.0235415
4930578I06Rik	0	0	0	0	0	0	0	0	0	0	0	0	0	0	0	0	0	0	0	0	0	0.143756	0	0	0
4930578M01Rik	0	0	0	0	0	0	0.0669817	0	0	0.288673	0	0.0334909	0	0	0.144337	0.0484759	0.147387	0.0410035	0	0	0.260973	0	0.1662	0.149535	1.2455
4930578N18Rik	0	0	0	0	0	0	0	0	0	0	0	0	0	0	0	0	0	0.0938692	0	0	0	0	0	0	0.142567
4930579F01Rik	0	0	0	0	0	0	0	0	0	0	0	0	0	0	0	0	0	0	0	0	0	0	0	0	0.0314052
4930579G18Rik	0.242068	0.888897	0.222208	0.22629	0.14933	0.325353	0.345661	0.649275	0.123124	0.167983	0.28371	0.617279	0.435742	0.174707	0.158657	0.56249	0.841475	0.868513	0.45723	0.716947	0.476078	0.294538	0.383614	0.521966	1.04446
4930579G24Rik	1.43348	1.41566	1.457	0.562127	0.673107	3.67524	0.483243	1.58243	0.787087	0.574962	2.55436	0.949452	1.51971	0.674607	0.624035	7.47547	4.3241	2.71341	1.72601	3.75099	3.53809	0.810981	1.12672	0.345129	1.43362
4930579K19Rik	0.183414	0.281371	0.288903	0	0	0.169727	0.198695	0.354779	0	0.0535199	0.17657	0.240033	0.321841	0	0.02676	0	0.400775	0.212857	0.0351507	0.105362	0.193538	0.125738	0.246623	0	0.2771
4930581F22Rik	0.395907	0.486696	0.664612	0.205712	0.120901	0.440427	0.499347	0.361258	0.348295	0.23251	0.418167	0.493022	0.512935	0.277004	0.176705	0.621654	0.582369	0.709978	0.579628	1.19902	0.739544	0.882932	0.79981	1.08633	0.997035
4930583K01Rik	0	0	0	0	0	0	0	0	0	0.0747185	0	0	0	0	0.0373592	0	0.0508652	0	0	0.0490315	0.360261	0.350895	0	0.412852	0.064476
4930583P06Rik	0	0	0	0	0	0	0	0	0	0	0	0	0	0	0	0	0.0652843	0	0	0	0	0	0	0	0.0827534
4930584F24Rik	0	0	0	0	0	0	0	0	0	0	0	0	0	0	0	0	0.0351013	0	0	0	0	0	0	0	0
4930590J08Rik	0	0	0	0	0	0	0	0	0	0.0318034	0	0	0	0	0.0159017	0.0427251	0.0649511	0.0813131	0.0104439	0	0.0383356	0.0747882	0	0.131796	0.0137219
4930590L20Rik	0	0	0	0	0	0	0	0	0	0	0	0	0	0	0	0	2.02933e-06	6.29867e-07	0	0	2.07316e-05	0	0.197274	0	1.03686e-07
4930591A17Rik	0	0	0	0	0	0	0	0	0	0	0	0	0	0	0	0	0	0	0	0	0	0	0	0	0
4930592A05Rik	0	0	0	0	0	0	0	0	0	0	0	0	0	0	0	0.108607	1.88354e-128	1.22266e-134	9.63259e-143	5.6595e-157	0.0502752	3.12718e-128	8.93859e-156	1.98173e-124	3.9383e-148
4930592I03Rik	0	0	0	0	0	0	0	0	0	0	0	0	0	0	0	0	0	0.0736297	0	0	0	0.304372	0	0	0
4930593A02Rik	0	0	0	0	0	0	0	0	0	0	0	0	0	0	0	0.046429	0	0.039272	0	0	0.166636	0	0	0	0
4930593C16Rik	0	0	0	0	0	0	0	0	0	0	0	0	0	0	0	0	0	0	0	0	0	0	0	0	0
4930594C11Rik	0.613501	0.13943	0.340011	0.459653	0.210905	0.410019	0.221537	0.131855	0.108918	0.198909	0.51176	0.180483	0.235933	0.284286	0.204907	0.941942	0.654476	0.491608	0.927536	0.783164	0.611398	0.233852	0.298141	0.303223	0.386195
4930595M18Rik	0	0	0	0	0	0	0	0	0	0	0	0	0	0	0	0	0	0	0	0	0	0	0	0	0
4930596D02Rik	0	0	0	0	0	0	0	0	0	0	0	0	0	0	0	0	0	0	0	0	0	0	0	0	0
4930596I21Rik	0	0	0	0	0	0	0	0	0	0	0	0	0	0	0	0	0	0	0	0	0	NA	NA	NA	NA
4930596M17Rik	NA	NA	NA	NA	NA	NA	NA	NA	NA	NA	NA	NA	NA	NA	NA	NA	NA	NA	NA	NA	NA	0	0	0	0
4930597A21Rik	0	0	0	0	0	0	0	0	0	0	0	0	0	0	0	0	0	0	0	0	0	NA	NA	NA	NA
4930597G03Rik	0	0	0	0	0	0	0	0	0.0742045	0	0	0	0	0.0371023	0	0	0	0	0	0	0	0	0	0	0
4930598F16Rik	0	0	0	0	0	0	0	0	0	0	0	0	0	0	0	0	0	0	0	0	0	0	0	0	0
4930599N23Rik	0	0.400927	3.16e-07	0.217217	0.392431	0	0.223744	0.269117	2.47e-07	0.251473	0	0.312335	0.134559	0.108609	0.321952	0.076859	0.462016	0.274246	0.0721111	0.482183	0.29825	1.72493	0.844198	0.301369	0.172113
4931402G19Rik	3.75e-141	0	7.35e-233	0.156349	2.62e-125	2.02e-240	0.026931	0.0319807	1.66e-282	3.55e-234	1.8739e-141	0.0134655	0.0159904	0.0781745	1.3105e-125	0.0206164	0.140775	0.16457	0.07651	0.102544	0.185621	0	0.074204	0.211321	0.228315
4931403E22Rik	0	0	0.196722	0	0	0	0	0.241579	0.149665	0	0	0	0.21915	0.0748325	0	0	0	0.124234	0	0.789182	0.0658926	0.256495	1.76082	0.226535	0.188685
4931403G20Rik	0	0	0	2.21e-13	1.5e-13	6.7e-16	0	0.0377225	0	0	3.34805e-16	0	0.0188612	1.10601e-13	7.50525e-14	0.0227818	0.0461616	0.0384362	0.11134	0.0222544	3.93098e-11	7.64332e-06	8.38906e-06	0.0212653	0.0588039
4931406B18Rik	0.00288596	0	0	0	0	0	0.00250111	0.0148862	0	0	0.00144298	0.00125055	0.0074431	0	0	0.00129293	0.0101916	0.0261559	0.116147	0.106986	0.00322249	0	0	0.0508108	0.0114792
4931406C07Rik	2.16791	5.41231	2.30997	32.7095	111.928	1.56843	6.18839	2.7903	31.6117	89.0218	1.86817	5.80035	2.55014	32.1606	100.475	11.525	21.7165	23.1122	9.60354	18.7418	55.4373	2.4609	0.973403	71.7365	52.682
4931406H21Rik	0.0475907	0.0486717	0.0499745	0.0740555	0	0	0.0386666	0.0613698	0.0190102	0.0138869	0.0237953	0.0436691	0.0556721	0.0465329	0.00694345	0.0559674	0.066175	0.0867903	0.273617	0.0273383	0.0334783	0.42455	0.160138	0.0575482	0.0359497
4931406P16Rik	1.82308	4.80008	3.44592	2.3017	3.33007	3.69712	5.83244	3.60642	2.60925	4.4595	2.7601	5.31626	3.52617	2.45547	3.89479	9.51864	8.27536	8.74332	4.53756	7.10357	7.30462	28.1544	24.2485	15.5099	20.4052
4931408C20Rik	0	0	0	0	0	0	0	0	0	0	0	0	0	0	0	0	0	0	0	0	0	0	0.0283581	0	0.0106099
4931408D14Rik	0	0	0.0960356	1.39156	8.31082	0	0.0155277	0.0393102	0.536316	9.14494	0	0.00776385	0.0676729	0.963938	8.72788	0.0478016	0.0968929	0.0475273	0.0233686	0.0466991	2.08292	3.34693	7.18014	2.21172	9.91387
4931409K22Rik	0	0	0	0	0	0	0	0	0	0	0	0	0	0	0	0	0	0	0	0	0.0248022	0	1.09832e-06	0	0
4931412M21	0	0	0	0	0	0	0	0	0	0	0	0	0	0	0	0	0.0157945	0	0	0	0	NA	NA	NA	NA
4931414P19Rik	2.33707	4.63093	2.56917	1.66682	1.74579	1.99371	3.61964	3.74362	1.72123	1.7475	2.16539	4.12528	3.15639	1.69402	1.74665	2.21879	3.67043	3.58402	1.45564	3.16053	2.22203	2.10452	1.86735	1.57494	2.16998
4931417E11Rik	0	0	0	0	0	0	0	0	0	0	0	0	0	0	0	0	0	0	0	0	0	0	0	0	0
4931417G12Rik	NA	NA	NA	NA	NA	NA	NA	NA	NA	NA	NA	NA	NA	NA	NA	NA	NA	NA	NA	NA	NA	0	0	0.0607346	0
4931419H13Rik	0	0	0	0	0	0	0	0	0	0	0	0	0	0	0	0	0	0	0	0	0	0	0	0	0
4931420L22Rik	0	0	0	0	0	0	0	0	0	0	0	0	0	0	0	0	0	0	0	0	0	0	0	0	0
4931423N10Rik	0	0	0	0	0	0	0.0287507	0	0	0	0	0.0143754	0	0	0	0	0.0210877	0.0528	0	0	0.0373393	0	0	0.106975	0
4931428F04Rik	7.41604	5.66927	3.38553	3.03953	1.85876	3.69724	5.75239	5.74688	1.99961	1.23052	5.55664	5.71083	4.56621	2.51957	1.54464	5.44992	5.58366	7.1399	7.34441	6.24999	3.85576	0.960488	0.784969	0.431491	0.424539
4931428L18Rik	0	0	0	0	0	0	0	0	0	0	0	0	0	0	0	0	0	0.0161948	0	0	0	0	0	0.0393737	0
4931429I11Rik	0	0	0	0	0	0	0	0	0	0	0	0	0	0	0	0	0	0	0	0	0	0	0	0	0
4931429L15Rik	0	0	0	0	0	0	0	0	0	0	0	0	0	0	0	0	0.0188445	0	0.0363614	0	0	0	0	0.00546263	0.00341244
4931429P17Rik	0	0	0	0	0	0	0.0260476	0	0	0	0	0.0130238	0	0	0	0	0	0	0	0	0	0	0	0	0
4931430N09Rik	0	0	0	0	0	0	0	0	0	0	0	0	0	0	0	0	0	0.0146938	0	0	0	0	0	0.0178622	0
4931431B13Rik	0	0	0	0	0	0	0	0	0	0.0487798	0	0	0	0	0.0243899	0.126644	0	0.107123	0	0	0.125093	0	0.0269412	0	0
4931431C16Rik	1.6e-09	0.0722778	2.17e-09	0.0734333	0.143749	0.0326525	0.0948918	0.0893138	0.138854	0.101197	0.0163263	0.0835848	0.0446569	0.106144	0.122473	0.0547755	0.0694943	0.0692092	0.0264893	0.0667669	0.208216	0.144939	0.0970065	0.0840545	0.176222
4931431F19Rik	0	0	0	0	0	0	0	0	0	0	0	0	0	0	0	0	0	0	0	0	0	0	0	0	0
4931440F15Rik	3.20035	2.25927	4.26774	4.43649	3.21216	2.18838	1.66445	3.42392	3.80122	2.73545	2.69436	1.96186	3.84583	4.11885	2.97381	0.527357	0.596347	0.549366	1.01499	1.11174	0.74214	3.49805	2.13457	0.650702	0.841497
4931440J10Rik	0	0	1.78e-08	0	0	0	0	0	0	0	0	0	8.9094e-09	0	0	0	0.050273	0	0.0485021	0	0	0	0.170062	0	0
4931440L10Rik	NA	NA	NA	NA	NA	NA	NA	NA	NA	NA	NA	NA	NA	NA	NA	NA	NA	NA	NA	NA	NA	0	0	0	0
4931440P22Rik	0.262671	0.171741	0.112126	0.727358	0.270621	0.291683	0.36992	0.554704	0.554436	0.377909	0.277177	0.27083	0.333415	0.640897	0.324265	0.360281	0.432115	0.39395	0.92618	0.434664	0.32156	1.06934	1.0459	0.708327	0.27415
4932411E22Rik	0	0	0	0	0	0	0	0	0	0	0	0	0	0	0	0	0	0	0	0	0	0	0.0475443	0	0
4932411N23Rik	0	0	0	0	0	0	0	0	0	0	0	0	0	0	0	0	0	0.00225234	0.0104145	0.0312168	0.00955694	0	0	0	0
4932412D23Rik	NA	NA	NA	NA	NA	NA	NA	NA	NA	NA	NA	NA	NA	NA	NA	NA	NA	NA	NA	NA	NA	0	0	NA	NA
4932413F04Rik	0	0	0	0	0	0	0	0	0	0	0	0	0	0	0	0	0	0	0	0	0	0	0	0	0
4932414J04Rik	0	0	0	0	0	0	0	0	0	0	0	0	0	0	0	0	0	0	0	0	0	0	0	0	0
4932414N04Rik	0	0	0	0	0	0	0	0	0	0	0	0	0	0	0	0	0	0	0	0	0	0	0	0	0
4932415G12Rik	NA	NA	NA	NA	NA	NA	NA	NA	NA	NA	NA	NA	NA	NA	NA	NA	NA	NA	NA	NA	NA	0.78929	0.803831	1.6672	2.58421
4932415M13Rik	0	0	0	0	0	0	0	0	0	0	0	0	0	0	0	0	0	0	0	0	0.0106968	0	0	0	0
4932416H05Rik	0.520397	1.78124	1.74034	0.812319	0.497386	0.468498	1.29804	1.80243	0.433027	0.506892	0.494447	1.53964	1.77138	0.622673	0.502139	0.849341	2.11066	2.29014	0.935833	1.80152	1.27354	0.750292	0.885773	0.473634	1.34061
4932416K20Rik	0	0	0	0	0	0	0	0	0	0	0	0	0	0	0	0	0	0	0	0	0	0	0	0	0
4932418E24Rik	0	0.0604298	0	0	0	0	0	0	0	0	0	0.0302149	0	0	0	0	0	0	0.0339717	0.0113142	0	0	0	0	0.0148781
4932429P05Rik	0	0	0	0	0	0	0	0	0	0	0	0	0	0	0	0	0	0	0	0	0	0	0	0	0
4932435O22Rik	0	0	0	0	0	0	0	0	0	0	0	0	0	0	0	0	0	0	0	0	0	0.111937	0.109777	0.0328768	0.0547673
4932438A13Rik	0.255101	0.918808	1.19381	0.805429	0.479487	0.236065	0.618792	0.647197	0.553809	0.576086	0.245583	0.7688	0.920504	0.679619	0.527787	2.41525	2.89504	3.28599	2.64639	2.51564	3.13752	2.16975	2.60572	1.46638	4.8343
4932438H23Rik	0	0.0398357	0	0	0	0	0	0	0	0	0	0.0199179	0	0	0	0	0.0154747	0	0	0	0	0	0	0.0314019	0.235405
4932441J04Rik	0	0	0	0	0	0	0	0	0	0	0	0	0	0	0	0.06528	0.0661595	0.165652	0	0.127549	0	0	0	0	0.167726
4932443I19Rik	0	0	0	0	0	0	0	0	0	0	0	0	0	0	0	0	0	0	0	0	0	0	0	0	0
4932702P03Rik	4.77e-07	7.26e-05	3.2e-07	3.25e-06	8.18e-06	2.07e-06	1.83e-06	1.68e-06	5.04e-06	1.18e-06	1.27509e-06	3.72209e-05	9.98721e-07	4.14291e-06	4.67828e-06	7.58379e-10	1.39328e-05	4.45893e-06	0	4.88412e-07	2.36302e-07	1.00755	0.487993	1.28558e-06	1.92787e-06
4933400A11Rik	0	0.173322	0	0	0	0	0	0	0.0676962	0	0	0.086661	0	0.0338481	0	0	0	0.337161	0	0	0.0596088	0.116192	0	0.102466	0
4933400B14Rik	0	0	0	0	0	0	0	0	0	0	0	0	0	0	0	0	0	0	0	0	0	0	0	0	0
4933400C23Rik	0	0	0	0	0	0	0	0	0	0	0	0	0	0	0	0	0	0	0	0	0	0	0	0	0
4933400F21Rik	0	0	0	0	0	0	0	0	0	0	0	0	0	0	0	0	0.0202778	0.00846202	0	0.00977341	0.00897631	0.210146	0.068697	0.0205734	0.0257039
4933400L20Rik	0	0	0	0	0	0	0	0	0	0	0	0	0	0	0	0	0	0	0	0	0	0	0	0	0
4933401B06Rik	0	0	0	0	0	0	0	0	0	0	0	0	0	0	0	0	0	0	0	0	0	0.117449	0	0	0
4933401D09Rik	0	0	0	0	0.0788895	0	0	0	0	0	0	0	0	0	0.0394448	0	0	0.030002	0.0148633	0	0	0	0	0.00781529	0
4933401H06Rik	0	0	0	0	0	0	0	0	0	0	0	0	0	0	0	0	0	0	0	0	0	0	0	0	0
4933401P06Rik	NA	NA	NA	NA	NA	NA	NA	NA	NA	NA	NA	NA	NA	NA	NA	NA	NA	NA	NA	NA	NA	0	0	0	0
4933402C06Rik	0	0	0	0	0	0	0	0	0	0	0	0	0	0	0	0	0	0	0	0	0	0	0	0	0
4933402D24Rik	0	0	0	0.0581152	0	0	0	0	0.0447549	0	0	0	0	0.0514351	0	0.0439206	0.0667684	0.0185752	0.128833	0.0214538	0.0394082	0.0768483	0	0	0
4933402E13Rik	0	0	0	0	0	0	0	0	0	0	0	0	0	0	0	0	0	0	0	0	0	0	0	0	0
4933402J07Rik	0	0	0	0	0	0.196456	0.172489	0	0	0	0.098228	0.0862445	0	0	0	0	0	0	0	0	0	0	0	0	0
4933402J10Rik	0	0	0	0	0	0	0	0	0	0	0	0	0	0	0	0	0	0	0	0	0	0	0	0	0
4933402J15Rik	0	0	0	0	0	0	0	0	0	0	0	0	0	0	0	0	0	0.0197998	0	0	0	0	0	0	0
4933402N03Rik	0	0	0	0	0	0	0	0	0	0	0	0	0	0	0	0	0	0	0	0	0	0	0	0	0
4933402N22Rik	0	0	0	0	0	0	0	0	0	0	0	0	0	0	0	0.0251328	0	0	0	0	0	0	0	0	0
4933402P03Rik	0	0	0	0	0	0	0	0	0	0	0	0	0	0	0	0	0	0	0.0708529	0	0	0	0	0.0248368	0
4933403G14Rik	NA	NA	NA	NA	NA	NA	NA	NA	NA	NA	NA	NA	NA	NA	NA	NA	NA	NA	NA	NA	NA	0.64231	0.489935	0.419219	1.44035
4933403O08Rik	0	0	0	0	0	0	0	0	0	0	0	0	0	0	0	0	0	0	0	0	0	0	0	0	0
4933404G15Rik	0	0	0	0	0	0	0	0	0	0	0	0	0	0	0	0	0	0	0	0	0	0	0	0	0
4933404K08Rik	0.0353421	0	0	0	0	0.0327047	0	0	0	0	0.0340234	0	0	0	0	0	0	0	0	0	0	0	0	0	0
4933404O12Rik	4.29662	4.95855	3.80634	1.36521	1.71673	7.14653	2.42787	3.17225	1.54937	0.890623	5.72157	3.69321	3.48929	1.45729	1.30368	6.12357	3.569	3.46109	2.38379	3.42619	2.10325	0.316868	0.559357	0.336055	0.26178
4933405D12Rik	0	0.157631	0	0	0	0	0.0834854	0.0993782	0.0246271	0.0899498	0	0.120558	0.0496891	0.0123135	0.0449749	0.01007	0.131216	0.11073	0.155032	0.295133	0.11617	0	0	0.434885	0.113195
4933405E24Rik	0	0	0	0	0	0	0	0	0	0	0	0	0	0	0	0	0	0	0	0	0	0	0	0	0
4933405L10Rik	0	0.0966444	0.198463	0	0	0	0.10237	0	0	0.165446	0	0.0995072	0.0992315	0	0.082723	0.0370437	0.41297	0.313335	0.0724406	0.108568	0.332379	0.259117	0	0.15236	0.0475887
4933405O20Rik	0	0	0	0	0	0	0	0	0	0	0	0	0	0	0	0	0	0	0	0	0	0	0	0	0
4933406C10Rik	0.0608417	0.248895	0	0	0.55699	0.0563015	0.131821	0.117686	0.291641	0.497098	0.0585716	0.190358	0.058843	0.14582	0.527044	0	0.193373	0.383303	0.0233202	0.0466005	0.577799	0.667651	0.40923	2.15811	0.551513
4933406D12Rik	0	0	0	0	0	0	0	0	0	0	0	0	0	0	0	0	0	0	0	0	0	0	0	0	0
4933406F09Rik	0	0	0	0	0	0	0	0	0	0	0	0	0	0	0	0	0	0	0	0	0	0.109479	0	0	0.0201022
4933406G16Rik	0	0	0	0.0744162	0	0	0	0	0	0	0	0	0	0.0372081	0	0	0.113996	0.0237854	0	0	0	0	0	0	0
4933406I18Rik	0.124191	0	0.217102	0.32172	1.18602	0	0.0672687	0	0.0992169	0.869728	0.0620955	0.0336344	0.108551	0.210468	1.02787	0.0486814	0.0821376	0.0685526	0.0792442	0.446528	1.22922	1.83037	1.16837	0.995898	0.930328
4933406J08Rik	0	0	0	0	0	0	0	0	0	0	0	0	0	0	0	0	0	0	0	0	0	0	0	0	0
4933406J10Rik	0	0	0	0	0	0	0	0	0.0889287	0	0	0	0	0.0444643	0	0	0	0	0	0.0426291	0	0	0	0.0897357	0
4933406K04Rik	0	0	0	0	0	0	0	0	0	0	0	0	0	0	0	0	0	0	0	0	0	0	0	0	0
4933406M09Rik	0	0	0	0	0	0	0	0	0	0	0	0	0	0	0	0	0.0220572	0.0736364	0.0212802	0	0.0585839	0.0761619	0	0	0
4933407E24Rik	0	0	0	0	0	0	0	0	0	0	0	0	0	0	0	0	0	0	0	0	0	0	0.0700867	0	0
4933407G14Rik	0	0	0	0	0	0	0	0	0.065649	0	0	0	0	0.0328245	0	0	0	0	0	0	0.0289031	0	0	0.0331224	0
4933407I05Rik	0	0	0	0	0	0	0	0	0	0	0	0	0	0	0	0	0	0	0	0	0	0	0	0	0
4933407K13Rik	0.383754	0.658791	0.374192	0.270142	0.209117	0.0380482	0.259828	0.342744	0.131393	0.159969	0.210901	0.459309	0.358468	0.200767	0.184543	1.58815	2.08871	2.03806	1.77874	1.27949	1.08947	0.639506	0.811626	0.415986	0.6833
4933407L21Rik	0	0	0	0	0	0	0	0	0	0	0	0	0	0	0	0.018051	0.0365884	0.030537	0	0	0.0161965	0	0	0.0371217	0
4933408B17Rik	0.08058	0.0824104	0.0846163	0.0417966	0	0.0372834	0.152763	0.0519553	0.0321879	0	0.0589317	0.117587	0.0682858	0.0369922	0	0.157939	0.14406	0.280545	0.1081	0.200586	0.410966	0.331694	0.162647	0.29232	0.142029
4933408J17Rik	0.105264	0.108533	0.0555848	1e-16	1.44e-12	0.0978299	0.0286687	1.45e-17	1.63e-13	0.0307619	0.101547	0.0686009	0.0277924	8.15956e-14	0.0153809	0.103891	4.64548e-12	0.0350506	0.060972	0.0609127	0.0185972	8.19196e-08	5.51025e-08	0.022898	0.0284733
4933408N05Rik	0	0	0	0	0	0	0	0.00369823	0	0	0	0	0.00184911	0	0	0	0.0102353	0.00160926	0.00345474	0.00219659	0.00317027	0	0.084872	0.050863	0
4933409G03Rik	0	0	0	0	0	0	0	0	0	0	0	0	0	0	0	0	0	0	0	0	0	0	0	0	0
4933411E08Rik	0	0	0	0	0.0294793	0	0.062791	0	0	0	0	0.0313955	0	0	0.0147396	0.090886	0.299359	1.76815	1.17747	0.910097	1.71252	0	0	0	0.058379
4933411G06Rik	0	0	0	0	0	0	0	0	0	0	0	0	0	0	0	0	0	0	0	0	0	0	0	0	0
4933411G11Rik	0	0	0	0	0	0	0	0	0	0	0	0	0	0	0	0.00872134	0.053033	0	0	0	0.00782532	0	0	0.0179353	0
4933411K16Rik	0	0	0	0	0	0.134425	0.275392	0	0.0580265	0.127164	0.0672125	0.137696	0	0.0290133	0.063582	0.0854171	0.201992	0.0722502	0	0	0.102189	0.199225	0.683833	0.146383	0.402352
4933411K20Rik	NA	NA	NA	NA	NA	NA	NA	NA	NA	NA	NA	NA	NA	NA	NA	NA	NA	NA	NA	NA	NA	1.94338	1.81556	1.76087	4.82579
4933412E12Rik	8.52513	13.2661	5.44753	1.31114	1.28561	9.17407	18.6202	5.78899	0.797148	1.24227	8.8496	15.9431	5.61826	1.05414	1.26394	54.983	75.021	55.1357	10.6421	15.1663	11.5239	0.564373	3.02584e-06	0.535937	0.937583
4933412E24Rik	0	0	0	0	0	0	0	0	0	0	0	0	0	0	0	0	0	0	0	0	0	0	0	0	0
4933412O06Rik	0	0	0	0	0	0	0	0	0	0	0	0	0	0	0	0.037084	0	0	0	0	0	0	0	0	0
4933413G19Rik	1.03e-08	0.205944	0.106628	2.34e-08	6.83e-09	1.99e-09	0.0544649	1.61e-09	9.49e-09	2.54e-10	6.14077e-09	0.130204	0.053314	1.64459e-08	3.54265e-09	0.0786899	7.68083e-10	0.0993568	0.0769075	0.308889	0.0363532	0	0	0	0
4933413J09Rik	0.0273163	0.0279368	0.0573691	0	0	0	0.014796	0.0528379	0.0436462	0.0318833	0.0136582	0.0213664	0.0551035	0.0218231	0.0159417	0.0535406	0.0651144	0.21738	0.0523505	0.104612	0.0384319	0.18744	0.147059	0.0550529	0.0550254
4933413L06Rik	0	0	0	0	0	0	0	0	0	0	0	0	0	0	0	0	0.0481028	0.040147	0	0	0	0	0.162734	0	0
4933415F23Rik	0.0275837	0	0	0	0	0	0	0	0	0	0.0137918	0	0	0	0	0	0.0219172	0.0182923	0	0	0	0.580206	0.432943	0.0444734	0.041673
4933416C03Rik	0	0	0	0	0	0	0	0	0	0	0	0	0	0	0	0	0	0	0	0	0	0	0	0	0
4933416E03Rik	0	0	0	0	0	0	0	0	0	0	0	0	0	0	0	0	0	0	0.0361026	0	0.0331298	0	0	0	0
4933416I08Rik	0	0	0	0	0	0	0	0.0526996	0	0.000273354	0	0	0.0263498	0	0.000136677	0.000183614	0	0	0	0	0	0.112682	0	0	0
4933416M06Rik	0	0	0	0	0	0	0	0	0	0	0	0	0	0	0	0	0	0	0	0	0	0	0	0	0.040502
4933416M07Rik	7.58e-18	0	0.258728	0	0.000173321	3.47e-47	0	3.95e-20	0	1.88e-05	3.78761e-18	0	0.129364	0	9.60366e-05	7.28156e-11	3.4058e-15	0.0406267	0.0537103	9.57983e-42	0.0976312	3.60606e-16	2.45401e-09	4.09589e-20	2.40052e-08
4933417A18Rik	0	0	0	0	0	0	0	0	0	0	0	0	0	0	0	0	0	0	0	0	0	0.157034	3.12639e-10	0.130074	0.108405
4933417D19Rik	0.254457	0.693965	0.267203	0.527944	0	0.156979	0.459426	0.382819	0.406574	0.0989999	0.205718	0.576696	0.325011	0.467259	0.0495	0.066499	0.235882	0.0843725	0.650209	0.422275	0.0895004	0.116305	0.114061	0.136754	0.299001
4933417E11Rik	0	0	0	0	0	0	0	0	0	0	0	0	0	0	0	0	0.0777034	0.0972778	0	0.0749022	0.240777	0	0	0	0.0984958
4933417G07Rik	2.06715	4.40439	4.0399	3.09754	1.63542	5.89808	5.03857	4.73895	2.47718	1.67553	3.98262	4.72148	4.38943	2.78736	1.65548	6.23507	4.65376	3.71271	5.28215	5.1457	3.59501	1.18053	1.15775	0.555481	1.90851
4933417O13Rik	0	0	0	0	0	0	0	0	0	0	0	0	0	0	0	0	0	0	0	0.0503719	0.0462637	0.090204	0	0.0265087	0.0993578
4933421I07Rik	0	0	0	0	0	0	0	0	0	0	0	0	0	0	0	0	0	0	0	0	0	0	0	0	0
4933421O10Rik	0.155009	0.707288	0.676136	0.470047	0.485151	0.0706175	0.587084	0.784182	0.428668	0.278346	0.112813	0.647186	0.730159	0.449358	0.381748	0.626341	1.09984	1.10091	0.933645	0.969901	0.985382	0.327293	0.545662	1.42416	2.42203
4933422A05Rik	0	0	0	0	0	0	0	0.0486602	0	0	0	0	0.0243301	0	0	0.0591689	0.029983	0.100096	0.0578537	0.0289021	0	0	0.101502	0.03042	0.0760121
4933422H20Rik	0	0	0	0	0.12443	0	0	0	0	0.0880909	0	0	0	0	0.10626	0	0	0	0	0	0	0.0690276	0	0.0202809	0
4933424G05Rik	0	0	0.0592463	0	0	0.0522099	0	0	0	0.0329266	0.0261049	0	0.0296232	0	0.0164633	0	0.022415	0.0187077	0	0.0432139	0.079379	0.0773964	0	0.0227417	0
4933424G06Rik	0	0	0	0	0	0	0.0510189	0	0	0	0	0.0255094	0	0	0	0.11077	0	0.0624633	0	0	0	0	0	0.0379662	0.047434
4933425B07Rik	0	0	0	0	0	0	0	0	0	0	0	0	0	0	0	0	0	0	0	0	0	0	0	0	0
4933425H06Rik	NA	NA	NA	NA	NA	NA	NA	NA	NA	NA	NA	NA	NA	NA	NA	NA	NA	NA	NA	NA	NA	0	0	0.0500587	0.0625421
4933425L06Rik	0	0	0	0	0	0	0	0	0	0	0	0	0	0	0	0	0	0.029523	0	0	0	0	0	0	0.0224195
4933426D04Rik	NA	NA	NA	NA	NA	NA	NA	NA	NA	NA	NA	NA	NA	NA	NA	NA	NA	NA	NA	NA	NA	0.909638	0.297362	7.93569	0.501303
4933426M11Rik	11.4344	15.4191	21.3309	6.97404	5.47473	11.1853	17.8412	30.9847	9.62699	6.51441	11.3099	16.6302	26.1578	8.30052	5.99457	15.2819	20.4826	19.3423	41.9476	20.9862	9.07636	0.000143522	0.000141859	5.20061	9.50941
4933427D06Rik	0	0.07358	0	0	0	0.0499327	0	0.0231941	0.0287389	0	0.0249663	0.03679	0.011597	0.0143695	0	0.0846094	0.0142916	0.0596392	0.0965168	0.0964344	0.0126528	0	0	0	0
4933427D14Rik	0.863588	1.20633	1.30497	0.240358	0.40708	1.05253	1.22076	0.869172	0.151447	0.344186	0.958059	1.21355	1.08707	0.195903	0.375633	2.60091	2.79495	3.06601	1.35632	1.33096	1.19278	1.04073	1.67272	0.602795	1.47441
4933427E11Rik	0.187298	0.176068	0.632731	0	0	0.079655	0.75331	0.447274	0	0.10047	0.133476	0.464689	0.540003	0	0.050235	0.0674865	0.376176	0.256876	0.0329932	0.164825	0.121106	0.0376485	0	0.104089	0.0433487
4933427E13Rik	0	0	0	0	0	0	0	0	0	0	0	0	0	0	0	0	0	0	0	0	0	0	0	0	0
4933427G17Rik	0.103567	0.317757	0.0543772	0.214879	0.316041	0	0.168292	0.133553	0.0827399	0.181323	0.0517835	0.243025	0.0939651	0.148809	0.248682	0.060898	0.185155	0.291894	0.0396963	0.237974	0.801407	0.0710404	0.0696696	0.0834908	0.547634
4933427I22Rik	0	0	0	0	0	0	0	0	0	0	0	0	0	0	0	0	0	0	0	0	0	0	0	0.555566	0
4933428C19Rik	0	0.144798	0	0	0	0	0	0	0	0	0	0.072399	0	0	0	0	0	0	0	0	0	0	0	0	0
4933428G20Rik	0.399053	0.400868	0.846404	9.33e-08	0.0819852	0.0734302	0.22267	0.252141	0.262879	0.133885	0.236242	0.311769	0.549273	0.13144	0.107935	0.152073	0.126114	0.3917	0.209649	0.151373	0.136329	NA	NA	NA	NA
4933429K18Rik	0	0	0	0	0	0	0	0	0	0	0	0	0	0	0	0	0	0.035544	0	0	0	0	0	0	0
4933429O19Rik	0	0	0	0	0	0	0	0	0	0	0	0	0	0	0	0	0	0	0	0	0	0	0	0	0
4933430H16Rik	0	0	0	0	0	0	0	0	0	0	0	0	0	0	0	0	0	0	0	0	0	0	0	0	0
4933430I17Rik	0	0.0563133	0.346924	0.228486	0.112018	0.101907	0.149124	0.106507	0.0879794	0.0642684	0.0509535	0.102719	0.226715	0.158233	0.0881432	0.194263	0.109378	0.200833	0	0	0.174305	0.0755354	0	0.110972	0.194105
4933430M04Rik	0	0	0	0	0	0	0	0	0	0	0	0	0	0	0	0	0	0	0	0	0	0	0	0	0
4933430N04Rik	0	0	0	0	0	0	0	0	0	0	0	0	0	0	0	0	0	0	0	0	0	0	0	0	0
4933431E20Rik	0.605453	2.18487	1.86949	1.53705	0.490157	0.233552	2.9261	1.75591	1.31894	0.63273	0.419503	2.55549	1.8127	1.42799	0.561443	0.652914	3.23089	4.21231	1.57208	3.13686	2.46279	0.484234	0.477336	0.446747	1.12864
4933431G14Rik	0	0	0	0	0	0	0	0.211133	0.0473801	0	0	0	0.105566	0.0236901	0	0.160563	0.330091	0.244397	0.11366	0.159274	0.0575878	0	0	0	0.0597334
4933432G23Rik	0	0	0	0	0	0	0	0	0	0	0	0	0	0	0	0	0	0	0	0	0	0	0	0	0
4933432I03Rik	0	0	0	0	0	0	0	0	0	0	0	0	0	0	0	0	0	0	0	0	0	0	0	0	0
4933432I09Rik	0.133288	0	0	0	0.0762317	0	0.121786	0.0966456	0.11975	0.0437365	0.066644	0.060893	0.0483228	0.059875	0.0599841	0	0.0893264	0.0994041	0.114907	0.143511	0.0527218	0.102779	0	0.0302079	0.113229
4933432K03Rik	0	0	0	0	0	0	0	0	0	0	0	0	0	0	0	0	0	0	0	0	0	NA	NA	NA	NA
4933433C11Rik	0	0.0725256	0	0	0	0	0.153645	0	0.0566541	0	0	0.113085	0	0.028327	0	0.027799	0	0	0.027181	0.0814735	0.0249429	0.486295	0.572294	0.142921	0
4933433F19Rik	0	0	0	0	0	0	0	0	0	0	0	0	0	0	0	0	0	0	0	0	0	0	0	0	0
4933433G08Rik	0	0	0	0	0	0	0	0	0	0	0	0	0	0	0	0	0	0	0	0	0	NA	NA	NA	NA
4933433G15Rik	0	0	0	0	0.186371	0	0	0	0	0	0	0	0	0	0.0931855	0.0359119	0	0.0607523	0.105341	0.105251	0.0644446	0.251211	0.123182	0.110779	0.369077
4933433G19Rik	3.85e-08	2.9e-08	1.71e-08	1.22e-08	9.61e-08	1.31e-08	0.0614393	0.0727309	9.99e-08	0.0694102	2.57825e-08	0.0307197	0.0363655	5.60839e-08	0.0347051	0.0894858	0.137715	0.0378826	0.0875516	0.0863375	0.0404333	0.417201	0.552225	0.088655	0.17116
4933433H22Rik	0.219416	0	0	0	0	0.862931	0.0594239	0.106104	0.0438232	0.192076	0.541173	0.029712	0.053052	0.0219116	0.096038	0	0.0217928	0.0181884	0	0	0	0	0.0737977	0.110552	0.0552485
4933434E20Rik	2.96683	3.45335	4.84842	2.85633	4.95049	6.03131	5.38431	3.73252	6.74397	6.93307	4.49907	4.41883	4.29047	4.80015	5.94178	12.5621	15.428	10.3234	6.28428	11.1204	10.0475	8.15363	10.196	9.40309	13.4173
4933434I20Rik	NA	NA	NA	NA	NA	NA	NA	NA	NA	NA	NA	NA	NA	NA	NA	NA	NA	NA	NA	NA	NA	0	0	0	0
4933436C20Rik	NA	NA	NA	NA	NA	NA	NA	NA	NA	NA	NA	NA	NA	NA	NA	NA	NA	NA	NA	NA	NA	0.5737	0.112526	1.78758	0.168556
4933436E23Rik	0	0	0	0	0	0	0	0	0	0	0	0	0	0	0	0	0	0	0	0	0	0	0	0	0
4933436H12Rik	0	0	0	0	0	0	0	0.0421802	0	0	0	0	0.0210901	0	0	0	0	0	0	0	0	0	0	0	0
4933436I01Rik	0	0	0	0	0	0	0	0	0	0	0	0	0	0	0	0	0	0	0	0	0	0	0	0	0
4933438B17Rik	0	0	0	0	0	0	0	0	0	0	0	0	0	0	0	0	0	0	0	0	0	0	0	0	0
4933438K21Rik	0	0.0298584	0	0.181721	0	0	0.0158137	0	0	0	0	0.0228361	0	0.0908605	0	0.0457787	0.0695932	0.0903513	0.212615	0.175165	0.0308066	0.0400483	0	0.0196132	0
4933439C10Rik	0.659951	0.557088	0.740474	0.113605	0.0560264	0.199898	0.508667	0.887153	0.172585	0.157446	0.429924	0.532878	0.813813	0.143095	0.106736	0.682202	0.97431	1.82768	0.963545	0.907724	0.600529	1.82951	2.07891	2.81433	1.39726
4933439K11Rik	0	0	0	0	0	0	0	0	0	0	0	0	0	0	0	0	0	0	0	0	0	0	0	0.047546	0.118806
4933440J02Rik	0	0	0	0	0	0	0	0	0	0	0	0	0	0	0	0	0	0	0	0	0	0	0	0	0
4933440M02Rik	0	0	0	0	0	0	0	0	0	0	0	0	0	0	0	0	0.0234606	0	0	0.0226149	0	0	0	0	0
5031410I06Rik	0	0	0	0	0	0.0195549	0	0	0	0	0.00977745	0	0	0	0	0.0381647	0.00599672	0.018393	0	0.00606957	0	0	0	0	0.0119721
5031414D18Rik	0.0355319	0.181695	0	0.110582	0	0.0986411	0.076984	0.0687294	0	0	0.0670865	0.129339	0.0343647	0.055291	0	0.195002	0.282327	0.106035	0.721812	0.136075	0.0124977	0.048757	0.38253	0.0143221	0.894684
5031425E22Rik	3.45261	2.08825	3.23571	1.61755	2.30355	2.64529	2.33262	5.93634	1.80921	2.75156	3.04895	2.21043	4.58603	1.71338	2.52755	1.84825	1.9174	2.48658	1.56526	1.7061	2.32431	12.226	7.24401	4.05529	3.04743
5031425F14Rik	0	0	0	0.188954	0	0	0	0.0782932	0.048505	0.0708652	0	0	0.0391466	0.11873	0.0354326	0	0.096484	0.241579	0.0465426	0.186012	0.0640654	0	0.163349	0	0.794962
5031426D15Rik	0	0	0	0.00775321	0.0126704	0.0013832	0	0	0	0	0.0006916	0	0	0.0038766	0.0063352	0.423002	0.628484	0.960736	0.632286	0.326809	0.300155	0.00256465	0	0.283175	0.773072
5031434C07Rik	0	0	0	0	0	0	0	0	0	0	0	0	0	0	0	0	0.0363262	0	0	0	0	0	0.059971	0	0.0229732
5031434O11Rik	0	0	0	0	0.344054	0	0	0	0	0.296092	0	0	0	0	0.320073	0.265183	0.134378	0.78507	0.0648221	0.453368	0	0.463226	1.13572	3.74925	1.10718
5031439G07Rik	67.8591	31.035	73.0359	67.4012	39.6055	57.329	26.143	47.1324	67.5792	41.7148	62.5941	28.589	60.0842	67.4902	40.6602	15.6232	12.1418	10.8144	22.8	12.311	6.0874	8.75047	10.9573	6.73649	9.11476
5033403H07Rik	0	0	0	0	0	0	0	0	0	0	0	0	0	0	0	0	0	0	0	0	0	0	0	0	0
5033404E19Rik	0	0	0	0	0	0	0	0	0	0	0	0	0	0	0	0	0	0	0	0	0	0	0	0	0
5033406O09Rik	0	0	0	0	0.0579922	0.0527576	0	0	0.0455472	0.033272	0.0263788	0	0	0.0227736	0.0456321	0.536377	0.996607	0.453696	0.0218523	0.109168	0.120318	0.312831	0.153397	0.114901	0.401954
5033411D12Rik	NA	NA	NA	NA	NA	NA	NA	NA	NA	NA	NA	NA	NA	NA	NA	NA	NA	NA	NA	NA	NA	4.08285	1.07802	4.31429	1.67182
5133400J02Rik	0	0	0	0	0	0	0	0	0	0	0	0	0	0	0	0	0	0	0	0	0	NA	NA	NA	NA
5330411J11Rik	0	0	0	0	0	0	0.0981105	0	0	0	0	0.0490553	0	0	0	0	0	0	0	0	0	0	0	0	0.0304056
5330413P13Rik	0	0	0	0	0	0	0	0	0	0	0	0	0	0	0	0	0	0	0	0	0	0	0	0	0.0127769
5330417C22Rik	0	0.0284826	0	0	0	0	0.0301701	0	0.0444989	0	0	0.0293264	0	0.0222495	0	0	0	0.00923446	0	0	0	0.0382202	0	0.0112257	0
5330426P16Rik	0.323813	0.275974	0.283361	0.167961	0.219587	0.898926	0.35079	0.487163	0.043116	0.251715	0.61137	0.313382	0.385262	0.105538	0.235651	3.4696	4.82425	5.00445	3.66139	2.91421	3.60668	2.4432	2.17823	0.282797	2.01121
5330434G04Rik	0	0	0	0	0	0	0	0	0	0	0	0	0	0	0	0.0210071	0.0638703	0.133267	0.0205401	0.0205226	0.00942442	0	0	0.0324006	0
5330439B14Rik	0	0	0	0	0	0	0	0	0	0	0	0	0	0	0	0	0	0	0	0	0	6.00903e-279	0.231149	0.0313023	0
5430401F13Rik	0	0	0	0	0	0	0	0	0	0	0	0	0	0	0	0	0	0	0	0	0	0	0	0	0
5430402E10Rik	0	0	0	0	0	0	0	0	0	0	0	0	0	0	0	0	0	0	0	0	0	0	0	0	0
5430402O13Rik	0	0.120788	0	0.122522	0	0	0	0.304624	0	0	0	0.060394	0.152312	0.061261	0	0.0462979	0.0938483	0.156657	0.0452688	0.180935	0.373907	0.485633	0.793788	0.285659	0.892247
5430403N17Rik	0.0370142	0.0757099	0	0	0.0376505	0	0.220538	0	0.0295708	0.0216013	0.0185071	0.148124	0	0.0147854	0.0296259	0.58039	1.61758	0.981849	0.0709362	0.155926	0.104152	0.0507899	0	0	0
5430405H02Rik	0.489937	1.16891	1.25911	1.10925	0.599418	0.68475	1.23301	0.980114	1.79123	0.974129	0.587344	1.20096	1.11961	1.45024	0.786774	1.0753	1.77478	2.34392	1.16106	2.05334	1.68551	1.28519	2.36004	2.05173	1.22846
5430407P10Rik	NA	NA	NA	NA	NA	NA	NA	NA	NA	NA	NA	NA	NA	NA	NA	NA	NA	NA	NA	NA	NA	6.4633e-06	1.74263e-05	NA	NA
5430416N02Rik	2.05976	2.73852	2.59553	2.35047	1.04759	2.28727	1.67352	0.796841	1.31645	0.360621	2.17352	2.20602	1.69619	1.83346	0.704106	12.9998	10.5563	11.8838	19.6583	10.4124	4.4918	4.511	4.42396	3.65308	1.24475
5430416O09Rik	0	0.343599	0	0	0.455658	0	0.0242638	0	0.161044	0.392138	0	0.183931	0	0.080522	0.423898	0.105361	0.133475	0.0816931	0.0171698	0.21444	0.519949	7.40842	5.8184	2.69939	2.32357
5430417L22Rik	NA	NA	NA	NA	NA	NA	NA	NA	NA	NA	NA	NA	NA	NA	NA	NA	NA	NA	NA	NA	NA	8.01891	7.53479	5.43824	12.8647
5430419D17Rik	0.0638377	0.0326439	0	0	0	0	0	0.0205802	0	0	0.0319188	0.016322	0.0102901	0	0	0	0	0	0	0	0	0	0	0	0
5430421F17Rik	0	0	0	0	0	0	0.0225225	0	0	0	0	0.0112613	0	0	0	0.0162999	0.059195	0.0551494	0.0159376	0.015924	0.0146253	0	0	0	0.0418799
5430421N21Rik	0	0	0	0	0	0	0.0303241	0	0	0	0	0.015162	0	0	0	0.0402346	0	0	0.0321875	0	0	0	0.0188292	0	0
5430425J12Rik	NA	NA	NA	NA	NA	NA	NA	NA	NA	NA	NA	NA	NA	NA	NA	NA	NA	NA	NA	NA	NA	0	0	0	0
5430425K12Rik	0	0	0	0.257934	0.252911	0	0	0.0534374	0	0.19347	0	0	0.0267187	0.128967	0.223191	0.0324889	0.0329266	0.0549616	0	0.0952189	1.92397	NA	NA	NA	NA
5430427M07Rik	0	0	0	0	0	0	0	0	0	0	0	0	0	0	0	0	0	0	0	0	0	0	0	0	0
5430427O19Rik	0	0	0	0.0248415	0.0487155	0	0.0129705	0.0154396	0	0.0139748	0	0.00648525	0.0077198	0.0124207	0.0313452	0	0.0190269	0	0	0	0.0336903	0.0328645	0.0644607	0.0965212	0.337656
5430428K19Rik	0	0	0	0	0	0	0	0	0	0	0	0	0	0	0	0	0.0493395	0.0823583	0.0476015	0	0	0.170195	0	0	0
5430434I15Rik	0	0	0	0	0	0	0	0	0	0	0	0	0	0	0	0	0	0	0	0	0	0	0	0	0
5430435G22Rik	1.01231	0.690204	0.157484	0	0.343238	1.04085	0.995104	0.145045	0.0299533	0.240688	1.02658	0.842654	0.151264	0.0149766	0.291963	6.67264	13.2967	11.2881	0.330528	0.47383	2.54518	0.308679	4.54085	1.05788	12.1218
5430437J10Rik	0	0	0	0	0	0	0	0	0	0	0	0	0	0	0	0.0354266	0.0359039	0.0299657	0	0	0	0	0	0.0364273	0.0455113
5430440P10Rik	0	0	0	0	0	0	0	0	0	0	0	0	0	0	0	0	0.0141784	0	0	0.0820038	0	0	0	0	0
5530400C23Rik	0	0	0	0	0	0	0	0	0	0	0	0	0	0	0	0	0	0	0	0	0	0	0	0	0
5530401A14Rik	0	0	0	0	0	0	0	0	0	0	0	0	0	0	0	0	0	0	0	0	0	0	0	0	0
5530601H04Rik	0.320387	0.630124	0.569352	0.204534	0.150413	0.159642	0.373776	0.333698	0.196891	0.129445	0.240014	0.50195	0.451525	0.200712	0.139929	0.753561	1.17657	1.03373	0.780893	0.736181	0.511439	0.507354	0.398051	0.387422	0.744671
5730403I07Rik	0	0	0	0	0	0	0	0	0	0	0	0	0	0	0	0	0	0.00788972	0	0	0	0	0	0	0.0718965
5730405O15Rik	0	0.260346	0.133657	0	0	0	0	0	0	0.074281	0	0.130173	0.0668285	0	0.0371405	0.19958	0.505673	0.253223	0.0975721	0.0974888	0.447689	0.348844	0	0.461739	0.640984
5730408K05Rik	10.367	5.17797	9.87363	7.25316	3.43334	8.92408	4.17886	4.04168	4.81527	1.68841	9.64554	4.67842	6.95765	6.03421	2.56087	22.4934	12.7392	8.23397	26.7063	24.1905	3.1376	2.62944	10.3148	2.3323	1.21414
5730409E04Rik	7.91902	9.5597	6.76293	4.66994	3.9105	4.53057	13.7679	12.7544	6.22154	3.75855	6.2248	11.6638	9.75867	5.44574	3.83453	8.60127	11.1946	15.4208	9.71748	12.1333	8.58142	0.000760336	0.000316281	2.64403	11.6323
5730412P04Rik	0	0	0	0	0	0	0	0	0	0	0	0	0	0	0	0	0	0.104057	0	0	0	0	0	0	0
5730416F02Rik	22.3047	3.94812	0.675633	0.593302	0.872621	19.0525	15.2567	7.97427	1.25649	1.0013	20.6786	9.60241	4.32495	0.924896	0.93696	8.46332	7.69689	4.05345	2.46612	2.05334	0.754352	0.0979439	2.97767	0.115263	1.72808
5730419I09Rik	NA	NA	NA	NA	NA	NA	NA	NA	NA	NA	NA	NA	NA	NA	NA	NA	NA	NA	NA	NA	NA	1.98376	2.62934	NA	NA
5730420D15Rik	0	0	0.0956492	0	0	0	0	0	0	0	0	0	0.0478246	0	0	0	0	0.181289	0.0349157	0.174484	0.0640937	0.124746	0.122339	0	0.0458746
5730422E09Rik	0	0	0	0.358152	0	0	0	0.0371001	0.0459692	0.0335802	0	0	0.01855	0.202061	0.0167901	0.0451122	0.04572	0.0190791	0.0882189	0.0661077	0.0607161	0.0789316	0	0.139159	0.028977
5730435O14Rik	0	0	0	0	0	0	0	0	0	0	0	0	0	0	0	0	0.167229	0	0	0	0	0	0	0	0
5730455P16Rik	0.662352	2.30589	1.79151	1.87396	1.39035	0.690314	1.72959	1.1906	1.69971	0.960507	0.676333	2.01774	1.49106	1.78683	1.17543	4.27831	6.04017	7.03569	2.95866	5.90522	5.60888	2.1763	2.62061	2.65685	7.83809
5730457N03Rik	0	0	0	0	0	0	0	0	0	0	0	0	0	0	0	0	0	0	0	0	0	0	0	0	0
5730460C07Rik	0	0	0	0	0	0	0	0	0	0	0	0	0	0	0	0	0	0	0	0	0	0	0	0	0.0268617
5730480H06Rik	0.227155	0.0580786	0.0596333	0.117824	0.057765	0.210204	0.338358	0.0366155	0.0907375	0.0898544	0.218679	0.198218	0.0481244	0.104281	0.0738097	0.308023	0.496351	0.376598	0.348266	0.297657	0.419461	0	0.229195	0.434915	0.823216
5730488B01Rik	0	0	0	0	0	0	0	0	0	0	0	0	0	0	0	0	0	0	0	0	0	0	0	0.0166331	0
5730507C01Rik	0.108702	0.379322	0.617795	0.152572	0.188631	0.213028	0.375823	0.321607	0.091952	0.100759	0.160865	0.377572	0.469701	0.122262	0.144695	0.907732	0.932156	0.976882	0.546355	0.595115	0.735296	0.0701428	0.0257649	0.0592816	0.756807
5730508B09Rik	0.186439	0.063558	0.130519	1.80517	3.28717	0.345052	0.134647	0.20035	1.29087	6.67337	0.265746	0.0991025	0.165435	1.54802	4.98027	0.99883	1.01229	0.680011	1.54831	1.52319	24.2633	3.75075	5.43396	3.08112	9.38898
5730522E02Rik	0	0	0.0693747	0	0	0	0	0	0	0	0	0	0.0346873	0	0	0	0	0	0	0	0	0	0	0	0
5730559C18Rik	0.371437	0.0316562	0	0	0	0.114573	0.536508	0.0598726	0	0	0.243005	0.284082	0.0299363	0	0	1.88073	2.20121	1.59082	0.664388	0.118539	0.0870973	0	0	0	0
5730577I03Rik	NA	NA	NA	NA	NA	NA	NA	NA	NA	NA	NA	NA	NA	NA	NA	NA	NA	NA	NA	NA	NA	0	0.0543919	0.133601	0.407118
5830403L16Rik	NA	NA	NA	NA	NA	NA	NA	NA	NA	NA	NA	NA	NA	NA	NA	NA	NA	NA	NA	NA	NA	0.0822489	0	0	0
5830403M04Rik	NA	NA	NA	NA	NA	NA	NA	NA	NA	NA	NA	NA	NA	NA	NA	NA	NA	NA	NA	NA	NA	0	0	0.0108217	4.01894e-07
5830411N06Rik	0	0	0	0	0	0	0	0	0	0	0	0	0	0	0	0	0	0	0	0	0	0	0.111414	0	0.0314206
5830415F09Rik	1.92635	1.90443	2.29255	1.79854	3.20046	3.14925	1.98249	2.07007	1.74416	4.23451	2.5378	1.94346	2.18131	1.77135	3.71748	2.06404	1.86226	1.4478	0.935247	1.42626	1.26477	2.02571	1.64112	0.69882	1.26113
5830416I19Rik	0	0	0	0	0	0.00829124	0	0	0	0.00697191	0.00414562	0	0	0	0.00348596	0	0	0	0	0.0137252	0	0	0.0964597	0.0288921	0.0721943
5830416P10Rik	0	0	0	0	0.0173829	0.0474414	0	0.0120201	0	0	0.0237207	0	0.00601005	0	0.00869145	0.00219787	0.00740646	0.0369277	0.0524008	0.00727168	0.0373335	0.023456	0.0920137	0.0358187	0.215149
5830417I10Rik	3.6782	4.79949	5.46343	3.68684	2.33367	2.92676	3.59866	4.99653	3.72985	2.12364	3.30248	4.19907	5.22998	3.70835	2.22865	4.91455	4.64093	4.80087	5.29533	4.89867	3.1369	2.85834	2.92844	1.96297	4.21769
5830418K08Rik	NA	NA	NA	NA	NA	NA	NA	NA	NA	NA	NA	NA	NA	NA	NA	NA	NA	NA	NA	NA	NA	0.849317	1.09424	0.987968	3.2442
5830418P13Rik	0	0.0900915	0	0	0	0	0.110603	0	0	0	0	0.100347	0	0	0	0.0345319	0.104992	0.0146045	0.0168822	0	0	0	3.2533e-07	0.0177536	0
5830428M24Rik	0	0	0	0	0	0	0	0	0	0	0	0	0	0	0	0	0.041685	0.0696584	0	0.0401823	0	0.00281356	0.00275927	0.084679	0.15778
5830432E09Rik	0.0673968	1.18e-08	0	0	0	0.333425	1.12e-09	0.0869106	0	0	0.200411	6.45891e-09	0.0434553	0	0	0.563017	0.22272	0.0893894	0.077498	0	0	0.60428	0.988603	0.114837	0.623176
5830444B04Rik	0.00282698	6.54e-07	0.00421312	0	0	1.07e-07	0.00614278	0	0.00246381	0.00412454	0.00141354	0.00307172	0.00210656	0.0012319	0.00206227	0.0335486	0.0321873	0.0296979	0.00420521	3.07629e-08	0.00139793	NA	NA	NA	NA
5830454E08Rik	0.161277	0	0	0	0	0	0.436783	0	0.128845	0.376483	0.0806385	0.218391	0	0.0644225	0.188242	0.126443	0.256293	0.106952	0.0618163	0.185291	0.283631	0	0	1.95022	0.406093
5830473C10Rik	0	0	0	0	0.0868338	0	0	0	0	0	0	0	0	0	0.0434169	0.016732	0.0508723	0.0283056	0.0163601	0	0	0	0	0	0.021495
5930403L14Rik	0	0	0	0.494431	0.517123	0	0	0.0102434	0.17769	0.333776	0	0	0.0051217	0.33606	0.425449	0	0.00631168	0	0	0	0	18.2956	4.36267	3.49961	0.300622
5930412G12Rik	0	0	0	0	0	0	0	0	0	0	0	0	0	0	0	0	0	0	0	0	0	0	0.053157	0.0477682	0.079574
5930430L01Rik	0.528912	0.760494	0.486985	0.241388	1.72036	0.574562	0.747357	0.607916	0.551156	1.84531	0.551737	0.753926	0.54745	0.396272	1.78283	0.964696	1.09732	1.47307	0.350159	0.400138	2.19239	NA	NA	NA	NA
5930438M14Rik	0	0	0	0	0.158283	0	0	0	0	0.295139	0	0	0	0	0.226711	0	0	0	0	0	0	0	0	0	0
6030407O03Rik	0	0.0556786	0.057169	0	0.0553779	0	0	0	0	0	0	0.0278393	0.0285845	0	0.027689	0	0	0	0	0.0416987	0	0	0	0.065833	0.137084
6030408B16Rik	0	0	0.0517865	0.255802	7.97609	0.00651944	0	0.0317975	0.315192	5.84249	0.00325972	0	0.041792	0.285497	6.90929	0.0193322	0.137149	0.179874	0.510368	0.623251	4.44059	0.0676583	0.132706	0.0894522	0.521544
6030419C18Rik	19.8154	17.5543	16.6558	5.26728	2.60521	13.8045	29.0354	20.0771	4.45124	1.99292	16.81	23.2949	18.3665	4.85926	2.29907	6.83421	9.72893	14.0198	7.85342	4.33635	2.49708	2.281	3.26479	1.28591	4.3672
6030440G07Rik	0.0122241	0.0174267	0.0242465	0.0270532	0.110487	0.0165907	0.0306048	0.0587771	0.078964	0.140529	0.0144074	0.0240157	0.0415118	0.0530086	0.125508	0.0829546	0.0428938	0.0645411	0.114639	0.0852909	0.056946	0	0	0.0612543	0.0474126
6030443J06Rik	0.031656	0.0539585	0.0696493	0.0218932	0.11449	0.0683521	0.0987973	0.117362	0.0421503	0.0246324	0.0500041	0.0763779	0.0935056	0.0320218	0.0695612	0.264733	0.398257	0.322528	0.0952705	0.229506	0.168872	NA	NA	NA	NA
6030458C11Rik	2.00063	5.21297	6.49162	4.55126	3.42562	1.98482	4.80794	5.35613	5.67341	3.4816	1.99273	5.01046	5.92387	5.11233	3.45361	9.83757	9.98668	11.0157	13.9756	11.4905	9.59582	0.0900402	0.108847	2.74472	4.29919
6030466F02Rik	0	0	0	0	0	0	0	0	0	0	0	0	0	0	0	0	0	0	0	0.135348	0	0	0	0	0.0711924
6030468B19Rik	0	0	0	0	0	0	0	0	0	0	0	0	0	0	0	0	0	0	0	0	0	0	0	0	0.100186
6030469F06Rik	0	0	0	0	0	0	0	0	0	0	0	0	0	0	0	0	0.0255104	0	0	0.0245908	0.180682	NA	NA	NA	NA
6030498E09Rik	0	0	0	0	0	0	0	0	0	0	0	0	0	0	0	0	0	0	0	0	0	0	0	0	0
6230400D17Rik	0	0.10058	0.413087	0.306069	0.100036	0.364027	0.532693	0.19023	0.314275	0.172182	0.182013	0.316636	0.301658	0.310172	0.136109	0.462624	0.8205	1.2067	0.565426	0.790921	0.312716	0.539834	0.132307	0.396409	0.445737
6330403A02Rik	0.0136864	0	0.0431158	0	0	0	0.0074133	0	0.0109341	0	0.0068432	0.00370665	0.0215579	0.00546705	0	0	0	0	0	0	0.0192557	0.206652	1.16071	0.0441334	0.151633
6330403K07Rik	0	0	0.0654933	0.129403	0	0.057715	0	0	0	0	0.0288575	0	0.0327467	0.0647015	0	1.12466	0.495569	0.579048	0.908413	0.238852	0.526493	0.0855497	0.0838989	0.125698	0.0314088
6330403M23Rik	NA	NA	NA	NA	NA	NA	NA	NA	NA	NA	NA	NA	NA	NA	NA	NA	NA	NA	NA	NA	NA	1.42186	1.69323	4.83571	6.52644
6330407A03Rik	0	0	0	0	0	0	0	0	0	0	0	0	0	0	0	0	0	0	0	0	0	0	0	0.0427641	0.0267142
6330408A02Rik	0.470137	1.27274	1.04458	0.77461	0.618872	0.588602	0.958689	0.784568	0.618626	0.500321	0.52937	1.11571	0.914574	0.696618	0.559597	1.32106	1.97766	2.59199	0.86913	2.13296	1.65798	2.46693	3.05208	1.22619	1.58684
6330409D20Rik	0	0	0	0	0.0967534	0	0	0	0	0.0555105	0	0	0	0	0.076132	0.0372868	0.113368	0.0315391	0	0.0364269	1.17096	0.784393	0.895239	0.42174	0.383208
6330410L21Rik	0	0	0	0	0	0	0	0	0	0	0	0	0	0	0	0	0	0	0	0	0	0	0	2.01102e-09	0
6330415B21Rik	0	0	0	0	0	0	0	0	0	0.00179869	0	0	0	0	0.000899345	0.0169147	0.0199997	0.0572293	0.0165387	0.0188852	0.00216813	0	0	0	0
6330415G19Rik	0.844418	1.39876	0.841018	0.500839	0.534075	0.448823	0.217009	0.295335	0.306627	0.472133	0.646621	0.807885	0.568176	0.403733	0.503104	0.687333	0.560333	0.486104	0.204713	0.537675	0.470303	NA	NA	NA	NA
6330416G13Rik	1.14205	3.32228	3.19801	7.71407	6.58287	1.57349	3.43664	2.14361	6.10286	8.82734	1.35777	3.37946	2.67081	6.90846	7.7051	1.8604	1.75439	2.38147	1.56613	2.07019	3.07073	5.15487	1.91285	5.51378	3.92367
6330418K02Rik	0.25141	1.36209	2.23789	0.475258	0.586877	0.410483	0.969482	2.12879	0.970635	0.0944712	0.330946	1.16579	2.18334	0.722947	0.340674	1.87095	3.43259	2.55123	1.05792	2.60565	1.43526	1.34494	1.17439	0.72483	1.07821
6330419J24Rik	0	0	0	0	0	0.0281325	0	0	0	0	0.0140663	0	0	0	0	0.0119174	0	0.0100804	0	0.0232851	0.010693	NA	NA	NA	NA
6330549D23Rik	0.447326	1.71134	1.70495	1.56403	1.76951	1.80909	2.20759	2.13645	1.91921	1.76939	1.12821	1.95947	1.9207	1.74162	1.76945	2.92906	3.03435	3.53779	2.62265	2.84248	2.54655	0.727519	1.29318	0.894856	2.34449
6430411K18Rik	1.09e-05	0.117929	0.0944161	0	6.19e-05	0.0519106	0.0403154	0.0436859	0	0	0.0259607	0.0791222	0.069051	0	3.09639e-05	0	0.102354	0.149803	4.44513e-07	0.00191311	0.0696486	0.0463193	0.0394501	0	0.0394084
6430503K07Rik	0	0	0	0	0	0	0	0	0	0	0	0	0	0	0	0	0	0	0	0	0	NA	NA	NA	NA
6430531B16Rik	0.0908449	0	0	0	0.184813	0	0.196826	0.117148	0	0.0530167	0.0454225	0.098413	0.058574	0	0.118915	0.0356117	0.288732	0.692812	0.487482	0.661018	0.223671	0.124557	0.488614	0.0732351	0.0914981
6430548M08Rik	7.01335	1.82361	5.00111	2.75796	3.05256	2.5989	1.23682	5.8884	2.16302	2.79844	4.80612	1.53022	5.44475	2.46049	2.9255	0.874402	2.583	3.35301	11.4403	3.17932	3.05196	1.94761	2.72447	0.453582	3.1288
6430550D23Rik	0.252921	0.129332	0.0663953	0.162127	0.423925	0.0482061	0.102747	0.0815368	0.0832359	0.243219	0.150564	0.11604	0.0739661	0.122681	0.333572	0.0681212	0.434624	0.858503	0.29083	0.319205	0.769566	0.428794	1.60803e-06	0.52495	0.377129
6430562O15Rik	0.0642338	5.64e-09	6.69e-08	5e-08	3.38e-08	2.19e-08	0.0343684	0.0409349	0.0496612	0.109159	0.0321169	0.0171842	0.0204675	0.0248306	0.0545795	0.0495393	0.0246226	0.0615622	0.120416	0.0725659	0.0662634	0.396801	0.811254	0.177182	0.35327
6430571L13Rik	0.18515	0.0378711	0	0.460976	5.51815	0.0685332	0.100287	0.143254	1.47917	5.87589	0.126842	0.0690791	0.071627	0.970073	5.69702	0.0145159	0.176538	0.208732	0.00354832	0.538884	5.25868	2.99788	0.199324	0.447778	0.111889
6430573F11Rik	0	0	0	0.33385	1.47307	0.0496335	0	0	0.0857001	1.8781	0.0248167	0	0	0.209775	1.67559	0	0	0	0	0	0	2.9432	1.51536	2.27004	1.32353
6430584L05Rik	0	0	0	0	0	0	0	0	0	0	0	0	0	0	0	0.28914	0.105493	0.048914	0.248788	0.0564944	0.0103774	0	0	0	0.148579
6430706D22Rik	33.3979	28.9268	43.9027	11.8516	15.4001	24.0829	12.0892	40.1999	21.8631	10.3009	28.7404	20.508	42.0513	16.8574	12.8505	22.053	17.772	11.5842	4.77125	17.0466	8.56342	4.26513	5.15857	5.35085	10.6318
6430710C18Rik	0	0	0	0	0	0	0	0	0	0	0	0	0	0	0	0	0	0	0	0	0	NA	NA	NA	NA
6530402F18Rik	2.10565	0.456799	0.958868	0.0661937	0.358364	1.37245	0.598475	1.09374	0.0509762	0.18191	1.73905	0.527637	1.0263	0.0585849	0.270137	0.0166753	0.0218368	0.0282097	0.0407616	0.00814536	0.00748105	2.10958	2.70795	0.766786	5.31899
6530411M01Rik	0	0	0	0	0	0	0	0	0	0	0	0	0	0	0	0	0	0	0	0	0	0	0	0	0
6720401G13Rik	NA	NA	NA	NA	NA	NA	NA	NA	NA	NA	NA	NA	NA	NA	NA	NA	NA	NA	NA	NA	NA	2.85207	3.02306	6.70945	7.27154
6720456H20Rik	NA	NA	NA	NA	NA	NA	NA	NA	NA	NA	NA	NA	NA	NA	NA	NA	NA	NA	NA	NA	NA	2.33261	3.1046	1.92921	5.04766
6720468P15Rik	0	0	0	0	0	0	0	0	0	0	0	0	0	0	0	0.0299739	0.0303777	0	0	0	0	0	0	0	0
6720483E21Rik	0	0	0.0996646	0	0.0965422	0	0	0	0	0.0553893	0	0	0.0498323	0	0.0759657	0.148822	0.150827	0.251762	0	0.0363474	0.033383	0.130123	0.127613	0.0382563	0
6720489N17Rik	0.0714433	0.541907	0.331347	0.0847027	0.0726715	0.126715	0.554205	0.0921286	0.00951273	0.020847	0.0990792	0.548056	0.211738	0.0471077	0.0467593	0.903165	0.931654	0.890032	0.136592	0.239989	0.489504	0.211241	0.105757	0.261232	1.20652
6820408C15Rik	0	0.0625598	0	0	0	0	0	0.0394387	0	0	0	0.0312799	0.0197194	0	0	0.0239791	0	0.0202828	0	0	0	0	0	0.189688	0.207368
7420426K07Rik	0	0	0	0	0	0	0	0	0	0	0	0	0	0	0	0	0	0	0	0	0	0	0	0	0
7420461P10Rik	0	0	0	0	0	0	0	0	0	0	0	0	0	0	0	0	0	0	0	0	0	0	1.44814e-09	0.0652493	0.100941
7420700N18Rik	0	0	0	0	0	0	0	0	0	0	0	0	0	0	0	0	0	0.0185632	0	0	0	0	0	0	0
7420701I03Rik	0	0	0	0	0	0	0	0	0	0	0	0	0	0	0	0	0	0	0	0	0	0	0	0	0
7530416G11Rik	0	0	0	0	0	0	0	0	0	0	0	0	0	0	0	0	0	0	0	0.0347904	0	0	0	0	0
7530420F21Rik	NA	NA	NA	NA	NA	NA	NA	NA	NA	NA	NA	NA	NA	NA	NA	NA	NA	NA	NA	NA	NA	0	0.130748	0	0.146917
7630403G23Rik	0	0	0	0	0	0	0	0	0	0	0	0	0	0	0	0	0	0	0	0	0	0	0	0	0
8030411F24Rik	0	0	0	0	0	0	0	0	0	0	0	0	0	0	0	0	0	0	0	0	0	0	0	0	0
8030423F21Rik	0	0	0	0	0	0	0.00222483	0	0	0	0	0.00111242	0	0	0	0.00161015	0.0391642	0.0354107	0	0.00188762	0	0	0	0.00794701	0.033096
8030423J24Rik	0	0	0	0	0	0	0	0	0	0	0	0	0	0	0	0	0	0	0	0	0	0	0	0	0
8030442B05Rik	0	0	0	0	0	0	0	0	0.0167359	0.0275074	0	0	0	0.00836795	0.0137537	0	0	0	0.0200736	0.0300846	0	0	0	0.0211098	0
8030443G20Rik	0	0	0	0	0	0	0	0	0	0	0	0	0	0	0	0	0	0	0	0	0	0	0	0	0
8030462N17Rik	0.757478	1.21736	2.47149	1.90838	1.21079	2.17796	1.49463	1.60473	2.11804	1.61036	1.46772	1.356	2.03811	2.01321	1.41057	4.40101	2.84815	2.86147	3.84695	3.25313	4.09634	3.08151	3.45897	1.29762	3.67839
8430403D17Rik	NA	NA	NA	NA	NA	NA	NA	NA	NA	NA	NA	NA	NA	NA	NA	NA	NA	NA	NA	NA	NA	0.00580971	0.0398833	0.0358349	0
8430406I07Rik	NA	NA	NA	NA	NA	NA	NA	NA	NA	NA	NA	NA	NA	NA	NA	NA	NA	NA	NA	NA	NA	5.14801	2.94506	NA	NA
8430408G22Rik	2.8902	3.84468	1.80913	0.324138	10.5677	4.05859	1.31253	0.1513	0.625456	7.11153	3.47439	2.57861	0.980215	0.474797	8.83962	0.0306625	0.124302	0.155673	0.0299809	0.0599107	3.49256	54.2643	39.2292	179.407	16.8797
8430410A17Rik	NA	NA	NA	NA	NA	NA	NA	NA	NA	NA	NA	NA	NA	NA	NA	NA	NA	NA	NA	NA	NA	5.55052	7.48469	5.01046	6.40552
8430419L09Rik	6.20905	4.44063	6.90763	2.11705	1.34708	7.07165	5.31521	7.2929	2.02927	1.31766	6.64035	4.87792	7.10027	2.07316	1.33237	2.56164	2.2339	2.34673	1.15666	1.71272	1.32104	0.864101	1.54875	0.455042	2.37247
8430422H06Rik	0	0	0	0	0	0	0	0	0	0	0	0	0	0	0	0	0	0	0	0	0	0	0	0	0
8430423G03Rik	0.799292	0.204362	0	0	0	1.29438	0.324705	0	0	0	1.04684	0.264533	0	0	0	0.0783317	0.476322	0.066257	0	0.15305	0.210852	0	0	0	0
8430426J06Rik	0	0	0	0	0	0	0	0	0.0957963	0	0	0	0	0.0478982	0	0	0.16738	0.235655	0.0538259	0.161344	0.106938	NA	NA	NA	NA
8430427H17Rik	NA	NA	NA	NA	NA	NA	NA	NA	NA	NA	NA	NA	NA	NA	NA	NA	NA	NA	NA	NA	NA	3.98748	2.91348	1.29535	1.45716
8430429K09Rik	0.807057	1.13334	2.10635	2.41798	2.93596	1.85093	2.32107	1.56838	2.72378	2.82952	1.32899	1.72721	1.83736	2.57088	2.88274	4.0811	5.09943	3.93594	3.69771	3.97735	4.30354	7.2045	3.36412	4.93043	2.38608
8430431K14Rik	0	0	0	0	0	0	0	0	0	0	0	0	0	0	0	0.0128618	0.0260701	0.141429	0	0.0125651	0.0115404	0	0	0	0
8430436N08Rik	0	0.61108	0	0	0	0.184306	0.215762	0	0	0	0.092153	0.413421	0	0	0	0.0390377	0.237382	0.198121	0	0.0381374	0.140108	0	0	0	0
8430437L04Rik	0	0	0	0	0	0	0	0	0	0	0	0	0	0	0	0	0	0	0	0	0	0	0	0	0
9030025P20Rik	1.26303	2.5061	2.12526	1.05135	1.56939	1.29476	2.45139	1.86279	1.2326	1.45655	1.27889	2.47874	1.99402	1.14197	1.51297	2.26212	4.36464	3.98081	1.82455	2.70871	2.75289	1.36971	1.62822	1.61571	3.46594
9030204H09Rik	0	0	0	0	0	0	0	0	0	0	0	0	0	0	0	0	0	0.0641918	0	0.0741398	0	0	0	0	0
9030404E10Rik	0	0	0	0	0	0	0	0	0	0	0	0	0	0	0	0	0	0	0	0.033129	0	0	0	0	0.0435644
9030612E09Rik	0.627378	1.65754	0.274501	0.325419	0.106361	0.2419	1.5292	0.640478	0.0417679	0.152556	0.434639	1.59337	0.457489	0.183593	0.129459	0	0	0.0346709	0	0	0	0	0	NA	NA
9030617O03Rik	26.0986	7.70172	1.69023	9.12424	25.6994	29.9228	27.3491	4.28101	10.2185	21.8569	28.0107	17.5254	2.98562	9.67137	23.7782	26.8502	32.3811	17.46	2.95254	8.00249	18.2381	5.91678	5.64787	9.80145	8.19275
9030619P08Rik	0	0	0	1.51917	2.30208	0	0	0	0.425426	1.16539	0	0	0	0.972298	1.73374	0	0.15867	0.0441424	0	0.101967	5.15078	0.182418	0.626143	0.214643	1.47494
9030624G23Rik	0.294873	0.818552	0.530818	0.3059	0.257094	0.233888	0.540004	0.701651	0.26923	0.122919	0.264381	0.679278	0.616235	0.287565	0.190006	0.299989	0.588536	0.519132	0.126478	0.31458	0.325965	0.115597	0.0850245	0.141496	0.890982
9030624J02Rik	20.2354	25.0714	15.1585	11.3919	11.0914	16.173	35.9117	17.9668	10.2146	9.98901	18.2042	30.4916	16.5627	10.8033	10.5402	21.9834	30.7284	26.1961	10.3744	15.7457	14.9965	8.2429	10.7206	5.30948	14.1109
9030625G05Rik	0.00937526	0.00811311	0	0.00822956	0.104901	0.023858	0.00797996	0	0.0166443	0	0.0166166	0.00804654	0	0.0124369	0.0524505	0	0.00634081	0.0151978	0.0148991	0.0155185	0.0285148	NA	NA	NA	NA
9130008F23Rik	0.355786	1.04612	0.280206	0	0.135714	1.39925	0.505872	0.229399	0.0710598	0.0259544	0.877518	0.775996	0.254802	0.0355299	0.0808342	5.07323	2.33226	2.32993	4.14224	1.19222	0.516207	0.732221	0.718092	0.304745	0.918258
9130011E15Rik	6.39506	10.7023	9.80176	6.86874	6.83354	4.93153	9.5695	9.10047	6.03796	6.57834	5.66329	10.1359	9.45111	6.45335	6.70594	5.22904	6.83929	5.71883	3.00826	5.41767	5.65744	3.90033	3.82507	1.96583	5.51392
9130015A21Rik	0	0	0	0	0	0	0	0	0	0	0	0	0	0	0	0	0	0.167068	0	0	0	0	0	0	0
9130015L21Rik	0	0	0	0	0	0	0	0	0	0	0	0	0	0	0	0	0	0	0	0	0	0	0	0	0
9130017N09Rik	NA	NA	NA	NA	NA	NA	NA	NA	NA	NA	NA	NA	NA	NA	NA	NA	NA	NA	NA	NA	NA	0.375668	0.0526313	0	0.137876
9130019O22Rik	0.244547	0.359017	0.215377	0.147305	0.0682059	0.397846	0.268124	0.192008	0.122894	0.101283	0.321196	0.31357	0.203692	0.1351	0.0847444	0.412832	0.468539	0.46494	0.412727	0.305882	0.184515	0.744333	0.881274	0.720206	0.95344
9130019P16Rik	0.0207403	0.0430565	1.57e-59	0.0213124	0.0428475	3e-152	9.2e-158	0.0269884	1.05e-69	6.35e-101	0.0103701	0.0215282	0.0134942	0.0106562	0.0214237	0.00795992	0.00864648	0.0212429	1.04444e-117	0.0918478	0.0292694	0.0313953	3.27007e-195	0.00840148	0.073723
9130023H24Rik	1.1927	2.68948	2.29513	0.898746	1.15291	1.36906	2.36543	3.30232	1.57911	1.14348	1.28088	2.52745	2.79873	1.23893	1.1482	1.89433	2.50014	2.57196	1.51407	2.22785	1.60725	0.841458	0.77	0.964941	1.88526
9130024F11Rik	1.001	0.403739	0.414544	0.0511915	0.166481	0.479913	0.629785	0.540886	0.137981	0.17279	0.740456	0.516762	0.477715	0.0945862	0.169635	0.845668	0.73122	0.662963	0.34999	0.319062	0.791741	0.0840503	0	0.0675305	0.0843517
9130204L05Rik	0	0	0	0	0	0	0	0	0	0	0	0	0	0	0	0.118706	0	0.602444	0.232134	0	0	0	0	0	0
9130206I24Rik	NA	NA	NA	NA	NA	NA	NA	NA	NA	NA	NA	NA	NA	NA	NA	NA	NA	NA	NA	NA	NA	0.803764	0.437919	0.131162	0.196644
9130209A04Rik	0	0	0	0	0	0	0	0	0	0	0	0	0	0	0	0	0	0	0	0	0	0	0	0	0
9130221F21Rik	0	0	0	0	0.0131591	0	0	0	0	0	0	0	0	0	0.00657955	0	0	0	0	0.00571649	0	0	0	0	0.0025773
9130221H12Rik	19.3078	20.9387	19.4411	20.9155	8.855	11.944	12.602	12.9298	13.1259	6.71062	15.6259	16.7704	16.1854	17.0207	7.78281	5.36229	7.56198	8.63331	8.26134	8.48364	7.62932	2.5835	5.03678	5.19944	7.88667
9130227L01Rik	0	0	0	0	0	0	0	0	0	0	0	0	0	0	0	0	0	0.00846912	0	0	0	0	0	0	0
9130230L23Rik	0	0	0	0	0	0	0	0	0	0	0	0	0	0	0	0.0545306	0.0276326	0	0	0	0	0.0953938	0.187106	0.420531	0
9130401M01Rik	14.9761	15.1954	14.8158	26.4932	25.8971	28.2641	16.3945	20.3286	32.4301	31.326	21.6201	15.795	17.5722	29.4616	28.6116	17.674	15.2712	14.8363	9.48648	19.6209	12.2817	9.07964	11.0245	7.1803	11.3129
9130409I23Rik	0	0	0	0	0	0	0	0	0	0.0149765	0	0	0	0	0.00748825	0.0402392	0.030586	0.0595638	0.0196724	0	0.0361051	0	0.138106	0	0
9230009I02Rik	0	0	0	0	0	0	0	0	0	0	0	0	0	0	0	0	0	0	0	0	0	0	0	0	0
9230102K24Rik	0	0	0	0	0	0	0	0	0	0	0	0	0	0	0	0	0	0	0	0	0	0	0	0	0
9230102O04Rik	0	0	0	0	0	0	0	0	0	0	0	0	0	0	0	0	0	0	0	0	0	0	0	0	0
9230104L09Rik	0	0.195812	0	0	0.194755	0	0	0	0	0	0	0.097906	0	0	0.0973775	0	0	0.063485	0	0	1.61624	0	0.257069	0.617395	1.54272
9230105E05Rik	0	0	0	0	0	0.0393242	0	0	0	0	0.0196621	0	0	0	0	0.0832921	0.0168828	0	0.0162881	0	0	0	0	0	0
9230110C19Rik	0.689026	1.92185	1.18398	1.55955	1.14688	2.49247	3.01964	1.33278	2.05174	0.913892	1.59075	2.47074	1.25838	1.80564	1.03039	7.09632	11.1736	10.4887	6.84255	9.3555	5.37581	0.343676	0.67409	0.858442	2.39739
9230110F15Rik	0	0	0	0	0	0	0	0	0	0	0	0	0	0	0	0	0	0	0	0	0	0	0	0	0
9230112D13Rik	0	0	0	0	0	0	0	0	0	0	0	0	0	0	0	0	0	0	0.058048	0	0	0	0	0	0
9230112J17Rik	0	0	0	0	0	0.0377842	0	0	0	0	0.0188921	0	0	0	0	0.0640332	0	0.0135388	0	0	0	0.168083	0.109887	0.0493805	0.0205624
9230114K14Rik	0.272555	0.278746	0.577185	0.188498	0.508275	0.672576	0.418287	0.497915	0.435491	0.266997	0.472566	0.348517	0.53755	0.311995	0.387636	2.28308	3.92524	4.20499	3.13206	2.0006	1.63771	0.0623245	0.132431	1.11692	1.85526
9230115E21Rik	NA	NA	NA	NA	NA	NA	NA	NA	NA	NA	NA	NA	NA	NA	NA	NA	NA	NA	NA	NA	NA	0.0442066	0.166381	0	0.0688529
9230116L04Rik	0.0623245	0.0637402	0.0713661	0.0646551	6.62e-09	4.19e-08	0.0360869	0.128607	0.103834	0.0415627	0.0311623	0.0499136	0.0999865	0.0842446	0.0207814	0.155662	0.129449	0.0214526	0.0242773	0.0249341	0.068282	NA	NA	NA	NA
9230116N13Rik	0.048387	0.0481146	0.289382	0.0476473	0.14157	0.220141	7.53e-11	0.179484	0.148478	0.217566	0.134264	0.0240573	0.234433	0.0980627	0.179568	0.294838	0.259343	0.280911	0.160811	0.397465	0.182349	1.06638	0.126816	0.762821	0.33607
9330020H09Rik	0.48544	0.827445	0.792954	1.18084	1.51595	0.89843	0.292157	0.817267	0.864455	1.24844	0.691935	0.559801	0.80511	1.02265	1.3822	1.3955	1.02858	0.867404	1.19966	1.66283	1.22452	0.41645	0.593262	0.755504	0.46255
9330102E08Rik	0.262539	0.341731	0.300753	2.72357	1.04393	0.220861	0.387833	0.707884	3.12709	0.807869	0.2417	0.364782	0.504319	2.92533	0.925899	0.626857	1.20423	2.27919	2.08577	3.09856	3.75249	NA	NA	NA	NA
9330111N05Rik	0	0	0	0	0	0	0	0	0	0	0	0	0	0	0	0	0	0	0.0277007	0	0	0	0.194408	0.0873917	0.109185
9330117O12Rik	0	0	0	0	0	0	0	0	0	0	0	0	0	0	0	0	0.0211135	0	0	0.0203524	0.037385	0	0	0	0
9330133O14Rik	0.697701	1.32516	1.32575	1.40654	0.27036	0.461168	1.68261	2.42065	0.614906	0.465343	0.579434	1.50388	1.8732	1.01072	0.367851	1.69311	3.87402	2.363	2.31767	3.11727	2.44235	1.23097	0.670676	1.37255	0.903494
9330151L19Rik	0.436984	1.18268	1.17352	1.10864	0.200323	0.661941	1.15086	1.19976	0.74634	0.413209	0.549462	1.16677	1.18664	0.92749	0.306766	2.10927	2.49177	2.82177	3.29551	2.77686	3.07962	0.95907	0.484645	2.33092	1.57307
9330158H04Rik	0.00428459	0	0	0	0	0.00462567	0	0.00322299	0	0	0.00445513	0	0.00161149	0	0	0	0.00108323	0.00248619	0	0.00143574	0	0	0	0.00230793	0
9330159F19Rik	0.00799166	0.0163464	0.268543	0.364782	2.12981	0	0.0865744	0.185499	0.324975	1.83758	0.00399583	0.0514604	0.227021	0.344878	1.98369	0	0.0126999	0.0132493	0.043905	0.0122421	0.196764	0.109693	0.32273	0.187419	2.13302
9330159M07Rik	0.0785472	0.0412243	0.0334494	0.0741778	0.12476	0.00606863	0.268526	0.155314	0.172682	0.218935	0.0423079	0.154875	0.0943817	0.12343	0.171847	0.488129	0.570271	0.539155	0.156793	0.173793	1.10782	0.000218685	4.92452e-07	2.61655	2.17436
9330162012Rik	4.26e-13	0.211036	0.144457	0.196296	0.458186	1.21e-18	0.159706	0.340492	0.133306	0.578012	2.13047e-13	0.185371	0.242475	0.164801	0.518099	6.51168e-08	0.0323805	0.0476067	8.8934e-07	0.0964522	0.118309	NA	NA	NA	NA
9330162B11Rik	0	0	0	0	0	0	0	0	0	0	0	0	0	0	0	0	0	0	0	0	0	0	0	0.0174531	0
9330175E14Rik	0	0	0	0.0676112	0.198884	0	0	0	0	0	0	0	0	0.0338056	0.099442	0.0510972	0.0517856	0.0864414	0.0249807	0.0249594	0.0916951	0	0.175337	0.0525404	0.262571
9330175M20Rik	0	0	0	0	0	0	0	0	0	0	0	0	0	0	0	0	0	0	0.00709664	0	0.0130246	0	0.0498311	0	0
9330178D15Rik	0	0	0	0	0	0	0	0	0	0	0	0	0	0	0	0	0	0	0	0	0	0	0	0	0
9330179D12Rik	0.0792022	0.391251	0	0.164433	0	0.265508	0.128756	0.184997	0.126592	0.0558136	0.172355	0.260003	0.0924985	0.145512	0.0279068	0.704644	1.26583	1.27029	0.303816	0.736747	1.79475	0	0.309641	0.0319246	0.718379
9330182L06Rik	0	0	0	0	0	0	0	0	0	0	0	0	0	0	0	0	0.00780999	0	0	0.00752845	0	0	0.0264609	0	0.0494992
9330182O14Rik	0	0	0	0	0	0	0	0	0	0	0	0	0	0	0	0	0	0	0	0	0	0.0645138	0	0	0.0236804
9330188P03Rik	0	0	0	0	0	0	0	0	0	0	0	0	0	0	0	0	0.0393384	0	0	0	0	NA	NA	NA	NA
9430007A20Rik	0	0	0	0	0	0	0	0	0	0	0	0	0	0	0	0	0	0	0	0	0	0	0	0	0
9430008C03Rik	3.15462	2.4143	3.31421	2.43127	0.63894	5.01951	1.68832	1.94227	2.01755	0.376945	4.08706	2.05131	2.62824	2.22441	0.507942	8.11221	3.76187	5.99414	8.82327	6.45702	2.84078	0.609101	0.882576	1.03445	1.38888
9430014N10Rik	0	0	0	0	0	0	0	0	0	0	0	0	0	0	0	0	0	0	0	0	0	0	0	0	0
9430015G10Rik	7.16381	10.5197	13.2057	2.69888	3.25996	6.27974	4.00285	7.3099	2.0483	1.84833	6.72178	7.26128	10.2578	2.37359	2.55415	8.40881	7.05508	6.28796	5.93823	6.1225	4.64202	0.000139863	1.1404	1.93011	1.61345
9430016H08Rik	2.17157	6.1868	5.50279	8.44792	12.859	8.08832	6.66459	8.09812	12.577	15.2524	5.12995	6.4257	6.80046	10.5125	14.0557	13.5941	13.6992	11.6621	10.8479	14.1531	19.7639	10.6718	9.07455	11.5444	11.8343
9430018G01Rik	0	0	0.0234654	0	0	0.041357	0.0121038	0.014408	0	0	0.0206785	0.0060519	0.0189367	0	0	0.122637	0.177556	0.177827	0.0256952	0.078446	0.149336	0	0.0300775	0.0190152	0.0225067
9430019J16Rik	0	0	0	0	0	0	0	0	0	0	0	0	0	0	0	0	0	0	0	0	0	0	0	0	0
9430020K01Rik	4.71582	4.45509	5.6375	3.5793	3.18438	5.89251	5.42619	16.1736	3.15022	2.84543	5.30417	4.94064	10.9055	3.36476	3.01491	9.89591	9.46823	11.9969	53.0569	12.744	9.71794	32.8962	23.4115	6.70128	15.5171
9430021M05Rik	0	0	0	0	0	0	0	0	0	0	0	0	0	0	0	0	0	0	0	0	0	0	0	0	0
9430023L20Rik	NA	NA	NA	NA	NA	NA	NA	NA	NA	NA	NA	NA	NA	NA	NA	NA	NA	NA	NA	NA	NA	23.2384	15.2693	20.3907	8.19318
9430037G07Rik	0.0609285	0.134595	0.363409	0.136527	0.163617	0.148848	0.14257	0.144119	0.046729	0.223302	0.104888	0.138582	0.253764	0.091628	0.19346	0.414154	0.448158	0.406922	0.0830663	0.178353	0.563364	0.401348	0.295202	0.77724	0.820215
9430038I01Rik	0.660767	0.772316	0.792989	0.783401	0.864163	1.22292	1.48276	1.09553	1.65908	1.15686	0.941843	1.12754	0.94426	1.22124	1.01051	3.03429	2.28762	2.22226	1.80905	2.49436	2.68934	3.23545	4.18839	2.77755	2.567
9430041J12Rik	0	0.0421825	0	0	0	0	0	0	0	0	0	0.0210912	0	0	0	0	0	0	0.0158091	0	0	6.64102e-170	0.0587337	0	0
9430060I03Rik	1.89542	2.3233	4.16515	2.30323	2.99943	0.599325	1.05189	1.75025	2.03127	1.20978	1.24737	1.68759	2.9577	2.16725	2.1046	0.338779	0.467655	0.429805	0.295495	0.411038	0.495657	0.0933862	1.34722e-08	0.536629	0.126173
9430069I07Rik	9.01e-07	6.51e-08	2.27e-07	1.67e-08	3.15e-08	0	2.49e-08	8.23e-09	0.201112	1.25e-07	4.50643e-07	4.50134e-08	1.17646e-07	0.100556	7.81521e-08	1.30256e-08	0.295225	0.249656	0.0967814	0.0963315	0.0855866	2.30443e-07	3.24576e-08	0	0.257952
9430076C15Rik	0	0.0944307	0.0323194	0	0	0.113924	0.137535	0	0	0	0.056962	0.115983	0.0161597	0	0	0	0.00244552	0.00170088	0.00131076	0	0.0108255	0	0.124264	0.0620291	0.232493
9430076G02Rik	NA	NA	NA	NA	NA	NA	NA	NA	NA	NA	NA	NA	NA	NA	NA	NA	NA	NA	NA	NA	NA	0	0	0	0
9430083A17Rik	0.00445837	0.0319175	0.36049	0.0647512	0.0317451	0.086639	0.11833	0.162807	0.149596	0.110797	0.0455487	0.0751238	0.261649	0.107174	0.0712711	0	0.175354	0.279399	0.047848	0.20318	0.131724	0.256964	0.252005	0.228228	0.129287
9430091E24Rik	0.244166	0.348277	0.198084	0.0831169	0.808564	0.0728021	0.22355	0.254832	0.41553	0.530407	0.158484	0.285913	0.226458	0.249323	0.669485	0.67537	0.958844	1.1448	0.684875	0.936023	1.65808	1.1651	0.603667	1.1449	1.15976
9530002B09Rik	0	0	0	0	0	0	0	0	0	0	0	0	0	0	0	0	0	0	0	0	0	0	0	0	0
9530003J23Rik	0	0	0	0	0	0	0	0	0	0	0	0	0	0	0	0.134308	0.102088	0.170407	0.131323	0.196816	0.723057	0	0	0	0.345082
9530026F06Rik	0	0	0	0	0	0	0	0.0407354	0	0	0	0	0.0203677	0	0	0	0.0251	0.0265349	0.0290589	0.00691289	0.0148145	0	0	0.00636645	0
9530026P05Rik	0	0	0	0	0	0	0	0	0	0.0641408	0	0	0	0	0.0320704	0	0	0	0.0842524	0	0.0773149	0.602599	1.32968	3.10105	3.15485
9530027J09Rik	0.0687176	0.0869701	2.67e-07	0.103688	0.240077	0.0706478	0.0434703	0.100352	1e-07	0.0902919	0.0696827	0.0652202	0.0501761	0.0518441	0.165184	0.312539	0.196578	0.24254	0.278089	0.206004	0.226465	2.09825e-08	0.22693	0.178854	0.040935
9530036O11Rik	0	0	0	0	0	0	0	0.00343256	0	0	0	0	0.00171628	0	0	0	0.00253805	0.00105914	0.00306081	0	0.00609906	0	0	0.00400563	0.0220672
9530048J24Rik	NA	NA	NA	NA	NA	NA	NA	NA	NA	NA	NA	NA	NA	NA	NA	NA	NA	NA	NA	NA	NA	0	0.257069	0.0771744	0
9530051G07Rik	0	0	0.0216874	0	0	0	0.0447469	0	0	0	0	0.0223734	0.0108437	0	0	0	0	0	0	0	0	0.0283462	0	0.108221	0.104007
9530052E02Rik	4.59e-09	4.04e-09	1.84e-08	3.39e-08	6.94e-08	1.52e-08	0.0671157	2.36e-08	6.96e-09	5.52e-08	9.91679e-09	0.0335579	2.09797e-08	2.04206e-08	6.23413e-08	0.048436	0.0966721	0.28926	0.0473305	0.0686431	0.346762	0.169908	0.177586	0.0472515	6.83618e-09
9530053A07Rik	0.101393	0.0115218	0	0	0.0114596	0.203291	0.0305111	0.0181597	0.00450018	0.00657471	0.152342	0.0210164	0.00907985	0.00225009	0.00901716	0.27381	0.156652	0.0280164	0.0237497	0.00431443	0	0	0.0303324	0.00908204	0
9530059O14Rik	0	0	0	0	0	0	0	0	0	0	0	0	0	0	0	0	0	0	0	0	0	0	0	0	0
9530068E07Rik	45.7975	101.063	88.2754	35.9913	32.5156	55.4992	113.106	108.875	58.9027	42.5348	50.6484	107.085	98.5752	47.447	37.5252	55.9521	68.6424	79.0868	72.4684	83.2506	52.5077	21.5093	27.9706	14.1702	58.4518
9530077C05Rik	0.445188	0.409771	0.327241	0.184734	0.0452842	1.07111	0.892211	0.114817	0.0711326	0.0779429	0.758149	0.650991	0.221029	0.127933	0.0616136	0.541	1.14964	1.32853	0.170637	0.18754	0.297514	0.183243	0.119804	0.143556	0.560487
9530080O11Rik	0	0	0	0	0	0	0	0	0	0	0	0	0	0	0	0	0	0	0	0	0	0.134481	0	0.105871	1.33387e-08
9530082P21Rik	17.7246	11.366	12.2578	10.3067	12.0245	13.3171	12.4563	10.4048	7.70242	8.85156	15.5208	11.9111	11.3313	9.00456	10.438	9.14012	10.8044	11.6824	3.93485	6.64495	6.57158	11.6174	11.2745	6.38742	7.6024
9530091C08Rik	0.00159802	0.00286006	0.00900563	0.00435167	0.0227569	0.00172523	0.00100984	0.0226677	0	0.00217606	0.00166162	0.00193495	0.0158367	0.00217584	0.0124665	0.011328	0.0571809	0.13318	0.019294	0.0306163	0.0262599	0.0921311	0.0489414	0.303498	0.104603
9630001P10Rik	0	0	0	0	0	0.00280568	0	0.00434212	0	0.00243296	0.00140284	0	0.00217106	0	0.00121648	0.000933849	0.00257639	0.00463846	0.00127833	0.0102437	0.00467408	NA	NA	NA	NA
9630013A20Rik	0	0	0	0	0	0	0	0	0	0	0	0	0	0	0	0.0736131	0.317071	0.342462	0.0539826	0.539365	0.0495376	0	0	0	0
9630028B13Rik	0	0.027771	0	0	0	0.00251278	0	0	0	0	0.00125639	0.0138855	0	0	0	0	0.0227747	0.0367076	0.0416319	0	0.00955097	0	0	0.00136816	0.00276257
9630028H03Rik	0	0.0426682	0	0	0	0.0386072	0	0	0	0	0.0193036	0.0213341	0	0	0	0	0.016575	0.0415009	0	0	0	0	0	0.0336332	0
9630033F20Rik	1.26048	1.3149	1.95896	5.70121	5.35939	5.55216	1.1197	2.35688	8.47898	7.50323	3.40632	1.2173	2.15792	7.09009	6.43131	4.84233	2.18337	2.29036	4.74436	3.03148	6.20691	2.49106	2.40906	2.22535	2.48831
9830001H06Rik	NA	NA	NA	NA	NA	NA	NA	NA	NA	NA	NA	NA	NA	NA	NA	NA	NA	NA	NA	NA	NA	10.7014	9.81202	2.52811	5.79867
9830107B12Rik	0	0	0	0	0	0	0	0	0	0	0	0	0	0	0	0.00503737	0	0	0	0	0	0	0	0.0207376	0.0647893
9830132P13Rik	0	0	0	0	0	0	0.00168876	0	0	0.00181952	0	0.00084438	0	0	0.00090976	0.00122218	0.0101156	0.00120609	0	0.001393	0.0399169	0	0	0	0.0109907
9830147E19Rik	0.0331613	0.123326	0.250721	0.103204	0.0901549	0.0585837	0.193336	0.157444	0.0486503	0.0826892	0.0458725	0.158331	0.204083	0.0759271	0.0864221	1.30691	1.57918	1.87845	1.59759	1.02267	1.6216	0.14837	0.332888	0.365758	1.35026
9830166K06Rik	0	0	0.071863	0	0	0	0	0	0	0	0	0	0.0359315	0	0	0	0	0	0	0	0.0120354	0	0	0	0
9930012K11Rik	7.56813	4.5946	0.769317	0.405262	0.993875	4.83887	2.22349	2.01334	0.273083	0.684318	6.2035	3.40904	1.39133	0.339172	0.839097	4.74719	5.122	6.73271	1.36736	2.13357	1.15163	0.0252897	0.0243072	0.0984148	0.467435
9930013L23Rik	NA	NA	NA	NA	NA	NA	NA	NA	NA	NA	NA	NA	NA	NA	NA	NA	NA	NA	NA	NA	NA	0.0690901	0.0846961	0.005072	0.00633683
9930014A18Rik	0.079537	0.319801	0.0438242	0	0.0825816	0.134094	0.204327	0.0255107	0.0944228	9.17e-09	0.106815	0.262064	0.0346675	0.0472114	0.0412908	0	2.92692e-08	0	0	0	0	2.14982	1.78572	0.257238	0.500975
9930021J03Rik	0.411295	1.97813	1.78595	1.22237	1.13072	0.462895	1.5414	1.31161	1.11897	0.93417	0.437095	1.75977	1.54878	1.17067	1.03245	6.37367	7.46792	10.6927	7.20912	7.57971	7.4053	1.93789	2.13993	2.85417	3.89062
9930104L06Rik	1.33374	1.39651	2.06747	0.889465	0.613731	1.93947	1.49645	1.8291	0.913311	1.14901	1.63661	1.44648	1.94829	0.901388	0.88137	3.72622	3.35168	4.20829	4.14649	3.55921	2.56898	2.65824	2.94884	1.536	2.13493
9930111H07Rik	0	0	0	0	0	0	0	0	0	0	0	0	0	0	0	0	0	0	0.00900057	0	0.00707953	NA	NA	NA	NA
9930111J21Rik1	0.331462	0.248088	0	7.42e-07	0.0845997	0.862131	0.288974	0	0	4.01e-07	0.596796	0.268531	0	3.71236e-07	0.0423001	0.587269	0.303995	0.19981	2.9123e-07	3.36539e-08	0.0312929	2.96953	3.41337	0.709401	4.08129
a	0	0	0	0	0	0	0	0	0	0	0	0	0	0	0	0	0.0707676	0.118126	0.0682747	0.0682165	0	0	0	0	0.089704
A030009H04Rik	NA	NA	NA	NA	NA	NA	NA	NA	NA	NA	NA	NA	NA	NA	NA	NA	NA	NA	NA	NA	NA	0.984452	0.965456	0.222508	0.166798
A130010J15Rik	0.583708	1.03821	1.61654	1.00083	0.690193	0.634086	2.23723	1.81252	0.86277	0.853542	0.608897	1.63772	1.71453	0.9318	0.771868	2.00416	2.04906	2.72321	2.13801	3.05141	4.32538	0.959941	0.00423891	0.617433	1.11069
A130049A11Rik	NA	NA	NA	NA	NA	NA	NA	NA	NA	NA	NA	NA	NA	NA	NA	NA	NA	NA	NA	NA	NA	0.0588757	0.053679	0.365322	0.29468
A130077B15Rik	0	0	0.0146129	0	0.00754939	0	0.00737009	0.00939975	0	0	0	0.00368505	0.0120063	0	0.00377469	0.00935159	0.0116071	0.0353023	0.0237624	0.0215709	0.0175275	0	0.0499374	0.0208341	0.147634
A1bg	0	0	0	0	0	0	0	0	0	0	0	0	0	0	0	0	0	0	0	0	0	0.147342	0.0722493	0.0865846	0.0270442
A1cf	0	0	0	0	0	0	0	0	0	0	0	0	0	0	0	0	0	0	0.00919606	0	0	0	0	0	0
A230001M10Rik	0	0	0	0	0	0	0	0.0337703	0	0	0	0	0.0168852	0	0	0	0	0	0	0	0	0	0	0	0.0263763
A230009B12Rik	0	0	0	0	0.104785	0	0	0	0	0	0	0	0	0	0.0523925	0	0.0204631	0.030632	0	0	0.104961	NA	NA	NA	NA
A230020J21Rik	1.34e-05	2.51e-07	0.0934001	0	1.37e-07	2.29e-07	1.21e-07	2.35e-06	0.10263	0.0400943	6.82957e-06	1.86007e-07	0.0467012	0.051315	0.0200472	4.6979e-08	0.0267908	0.0230951	0.082454	4.258e-08	2.05742e-08	1.221	0.959219	0.114717	3.98041e-08
A230028O05Rik	0.0671663	0	0	0.104517	0.0409926	0.031077	0.145524	0.108267	0.0268297	0.0391979	0.0491217	0.072762	0.0541335	0.0656734	0.0400952	0.250131	0.173448	0.0556773	0.0901051	0.131184	0.366179	0	0.0903901	0.045122	0.0169123
A230046K03Rik	2.91256	5.86644	6.60616	2.90894	2.28384	2.23378	6.1122	3.9406	2.40909	1.65293	2.57317	5.98932	5.27338	2.65902	1.96839	9.36363	10.6986	10.8505	7.4881	7.30492	5.82691	1.7309	2.58765	1.2437	6.46844
A230050P20Rik	1.93e-08	2.36e-07	0	5.44e-08	1.74e-07	8.48e-08	0.0813598	2.24e-08	7.39e-08	0.0404396	5.20868e-08	0.04068	1.12062e-08	6.41455e-08	0.0202199	3.9559e-08	4.40202e-08	0.0276577	0.0331509	0.00793242	3.77729e-08	7.62183	11.3906	1.75996	2.58621
A230056J06Rik	0	0	0	0	0.0599608	0	0.0159646	0	0	0.0688028	0	0.0079823	0	0	0.0643818	0	0.023419	0.00977285	0	0.0112874	0	0	0.039667	0.0237604	0
A230056P14Rik	3.8e-07	0.100535	1.7e-07	1.69e-07	0.131704	0.0826936	0.346234	0.0580964	0.0674662	8.28e-08	0.041347	0.223385	0.0290483	0.0337332	0.065852	0.231511	0.370335	0.931479	0.255738	0.617588	0.379831	1.15139	0.847207	0.298928	0.534697
A230057D06Rik	0	0	0	0	0	0	0.183143	0.0311439	0	0	0	0.0915715	0.0155719	0	0	0.378698	1.85183	2.15417	0.351766	0.342217	0.628613	0	0	0	0.0486499
A230065H16Rik	0	10.7934	5.44042	0.199061	0	0	1.66297	0.989771	0	0	0	6.22818	3.2151	0.0995305	0	0	0.0762336	0.0636251	0	0	0.134984	0	0	0	0
A230070E04Rik	0	0	0	0	0	0	0	0	0	0	0	0	0	0	0	0	0	0	0	0	0	0	9.14403e-06	0	2.77703e-08
A230072C01Rik	0.198553	0.650141	0.696048	1.03145	0.730428	0.265315	0.414023	0.756824	0.807972	0.69547	0.231934	0.532082	0.726436	0.919711	0.712949	1.24314	1.57952	1.98179	1.06171	1.37499	1.74686	1.5099	0.229416	2.23654	2.10979
A230072E10Rik	0	0	0	0.00974281	0	0.0304177	0.00508701	0	0.045018	0.0164427	0.0152088	0.00254351	0	0.0273804	0.00822135	0.112687	0	0.0122282	0.0126428	0.01079	0.056509	0.0386658	0	0.0908532	0.0237125
A230073K19Rik	2.99e-200	1.89e-203	0.0438362	8.11e-118	5.36e-210	1.59e-105	0.0150551	0.00872423	2.12e-139	0.0159888	7.9644e-106	0.00752755	0.0262802	4.0546e-118	0.0079944	0.0394156	0.0988127	0.133984	0.121429	0.0866229	0.101132	0	0	0.0544205	0.0827595
A230077H06Rik	0	0	0	0	0	0	0	0	0	0	0	0	0	0	0	0	0.00445469	0	0.0122793	0	0	0	0	0.0154958	0.0645337
A230103J11Rik	0.511299	0.237195	0.224677	0.303261	0.168848	0.127815	0.195938	0.356762	0.102376	0.124179	0.319557	0.216566	0.29072	0.202819	0.146513	0.838727	0.701402	0.604942	0.435882	0.459092	0.232764	NA	NA	NA	NA
A230108P19Rik	0.0378685	0	0	0	0	0	0.0205117	0	0	0	0.0189342	0.0102559	0	0	0	0.0148447	0	0.0376692	0	0	0	0	0	0.0305279	0
A2m	0	0	0	0	0.0197993	0	0	0	0	0	0	0	0	0	0.00989965	0	0	0	0	0	0	0	0	0.00784578	0.00980233
A330009N23Rik	0.929264	2.3637	1.05451	0.222533	0.317523	1.20737	1.98664	1.17221	0.249383	0.283192	1.06832	2.17517	1.11336	0.235958	0.300357	0.366818	0.548609	1.16967	0.897784	0.528832	0.348054	1.48807	1.54119	0.736485	1.0311
A330015K06Rik	0	0	0.0916212	0	0	0.0403699	0.0472598	0.112513	0	0	0.020185	0.0236299	0.102067	0	0	0.188115	0.103991	0.0144652	0.0501638	0.0835349	0.0153444	NA	NA	NA	NA
A330021E22Rik	NA	NA	NA	NA	NA	NA	NA	NA	NA	NA	NA	NA	NA	NA	NA	NA	NA	NA	NA	NA	NA	0.0392377	0.0769612	0.0806728	0.331169
A330023F24Rik	0.0348423	0.124718	0.0731753	0.0722905	0.124045	0.0161211	0.0754901	0.0224652	0.0139179	0.0714653	0.0254817	0.100104	0.0478203	0.0431042	0.0977551	0.157521	0.36481	0.943499	0.220851	0.269475	0.602463	0.4065	0.178272	1.05001	0.977779
A330032B11Rik	0	0.0177765	0	0	0	0.00426484	0	0.00272395	0.0239328	0.0434578	0.00213242	0.00888825	0.00136198	0.0119664	0.0217289	0.0281538	0.00425199	0.0168098	0.0252984	0.0130656	0.00523446	0.141513	0	0.0871566	0.0259107
A330033J07Rik	0	0	0	0	0	0	0.0721212	0.0214627	0	0	0	0.0360606	0.0107314	0	0	0.0654257	0.0799049	0.0887097	0.243707	0.0513899	0.0234844	NA	NA	NA	NA
A330035P11Rik	0.346815	0.496571	0.29135	0.539677	0.458611	0.0962804	0.356923	0.178892	0.138536	0.26312	0.221548	0.426747	0.235121	0.339106	0.360866	0.244716	0.688926	1.10397	0.199397	0.411736	0.866099	0.571089	0.326707	0.517236	0.995531
A330040F15Rik	0	0	0	0	0.490202	0	0.208826	0.0621448	0	0.674987	0	0.104413	0.0310724	0	0.582595	0.113348	0.459502	0.255669	0.073886	0.147646	0.474614	1.91603	0.51836	0.27195	0.970764
A330041J22Rik	0	0	0	0.0550306	0.053959	0	0	0	0.0423795	0.247664	0	0	0	0.048705	0.150811	0.0831788	0.0421497	0.0175892	0.0203325	0.0203151	0.0559748	0.149058	0.217652	0.299349	0.186999
A330048O09Rik	0	0	0	0	0	0	0	0	0	0	0	0	0	0	0	0	0	0	0	0	0	0	0	0	0
A330049N07Rik	0	0	0	0	0	0	0	0	0	0	0	0	0	0	0	0.0143205	0	0.0296096	0.0186696	0.00621788	0.0256984	0	0	0	0.0122647
A330050B17Rik	NA	NA	NA	NA	NA	NA	NA	NA	NA	NA	NA	NA	NA	NA	NA	NA	NA	NA	NA	NA	NA	0.0325019	0.0602022	0.0183777	0.052651
A330050F15Rik	0	0	0	0	0	0	0	0	0	0	0	0	0	0	0	0	0	0	0	0	0	0	0	0	0
A330069E16Rik	0.252714	0.139168	0.437864	0.28089	0.79204	0.417143	0.279989	0.244412	0.875429	0.553879	0.334929	0.209579	0.341138	0.57816	0.67296	0.779293	1.004	0.724454	0.746617	0.980132	1.05046	0	0.509447	0.286209	0.266904
A330070K13Rik	0	0	0	0	0	0	0	0	0	0	0	0	0	0	0	0	0	0	0	0	0	0	0	0	0
A330074K22Rik	7.41991	6.22643	1.39849	0.750001	0.54187	0.492959	14.3242	3.77822	0.395187	1.02149	3.95643	10.2753	2.58835	0.572594	0.78168	1.04413	4.73165	4.65562	1.21052	1.64665	2.24846	NA	NA	NA	NA
A330076C08Rik	0	0	0	0	0	0	0	0	0	0	0	0	0	0	0	0	0	0	0	0	0	0	0	0	0
A330076H08Rik	0	0	0	0	0	0	0.0865691	0.0343496	0	0	0	0.0432845	0.0171748	0	0	0.0626517	0.698453	0.653593	0.0816788	0.122414	0.11243	0	0	0	0.0268288
A330093E20Rik	0	0	0	0	0	0	0	0	0	0	0	0	0	0	0	0	0	0	0	0	0.0138818	0	0	9.27935e-08	0
A330102I10Rik	0	0	0	0	0	0	0.270085	0	0	0	0	0.135043	0	0	0	0	0.135384	0.0670243	0.154959	0.0774114	0	0	0	0.0814769	0
A3galt2	0.0818716	0	0.143288	0.113244	0.0277597	0.0757621	0.0591282	0.0879802	0.130815	0.0318533	0.0788168	0.0295641	0.115634	0.122029	0.0298065	0.0320941	0	0.0361959	0.167364	0.0418053	0.00959894	0.299622	0.18365	0.0110002	0.0412302
A430005L14Rik	3.90595	8.31509	12.2955	10.3015	10.1903	15.4956	9.43914	12.771	10.6556	10.795	9.70078	8.87711	12.5333	10.4786	10.4926	12.8583	11.178	10.4995	12.0305	11.8567	10.9435	0.000179331	5.59138e-05	6.90718	7.9907
A430033K04Rik	0.325535	1.21065	1.21198	1.10011	0.496697	0.498419	0.665235	0.477032	0.543785	0.328148	0.411977	0.937943	0.844506	0.821948	0.412423	1.46405	2.21038	2.8771	0.996416	2.48657	2.09224	0.812253	0.995725	0.833135	1.92999
A430035B10Rik	0	0.0513391	0.0527133	0.052076	0	0.0464528	0.299095	0.0323666	0.0401041	0.322254	0.0232264	0.175217	0.0425399	0.0460901	0.161127	0.157426	0.438754	0.282963	0.0769633	0.48061	2.06581	0.482078	0.540315	1.27474	1.16288
A430071A18Rik	NA	NA	NA	NA	NA	NA	NA	NA	NA	NA	NA	NA	NA	NA	NA	NA	NA	NA	NA	NA	NA	8.81905e-10	8.32072e-06	0.255366	0.0410042
A430078G23Rik	0	0.0171644	0	0.00466359	2.88084	0	0	0.00676326	0.00628506	3.79233	0	0.0085822	0.00338163	0.00547433	3.33658	0.0318674	0.00625098	0.0113038	0.0201026	0.022094	0.0166026	0	0.211752	0.0126842	0.084519
A430088P11Rik	0	3.78e-08	0	0	0	0	0	0	0	0.00151971	0	1.88847e-08	0	0	0.000759855	0	3.64622e-09	0	0	0	3.17314e-09	1.03999e-08	6.58226e-05	0.0123136	0.0121183
A430090L17Rik	0	0	0.0786419	0	0	0	0.0135216	0	0.039887	0	0	0.0067608	0.039321	0.0199435	0	0.0587151	0.0892592	0.206934	0.105252	0.0764813	0.166829	0	0.100798	0.211307	0.100572
A430092G05Rik	NA	NA	NA	NA	NA	NA	NA	NA	NA	NA	NA	NA	NA	NA	NA	NA	NA	NA	NA	NA	NA	0	0	0	0.028121
A430093F15Rik	0	0	0	0	0	0	0	0	0	0.0265519	0	0	0	0	0.0132759	0.0535054	0	0	0	0.0348476	0	0	0.0612178	0	0.0458243
A430105I19Rik	5.64628	1.32046	1.09274	0.719683	1.54855	7.33809	2.71388	1.7395	0.600419	1.37204	6.49219	2.01717	1.41612	0.660051	1.46029	11.2557	7.70188	5.70601	7.02433	7.81537	10.3908	2.98879	6.27726	1.27388	12.3248
A430107P09Rik	NA	NA	NA	NA	NA	NA	NA	NA	NA	NA	NA	NA	NA	NA	NA	NA	NA	NA	NA	NA	NA	0	0.115093	0.0056025	0.0239303
A4galt	10.1313	2.07223	2.41788	2.57974	3.09162	2.08656	12.0483	10.7318	2.13752	3.5177	6.10893	7.06027	6.57484	2.35863	3.30466	0.0257526	0.353243	0.171183	0.251079	0.249101	0.195218	0.82819	2.88027	0.717107	5.17176
A4gnt	0	0	0	0	0	0	0	0	0	0	0	0	0	0	0	0.0133504	0.0405908	0	0	0	0	0	0	0	0
A530006G24Rik	0	0	0	0	0	0	0	0	0	0	0	0	0	0	0	0	0	0	0	0	0	0	0	0	0
A530013C23Rik	0.270977	0.0923633	0.0948356	0.550261	0.689121	0.0835724	0.292891	0.145595	0.541235	0.361146	0.177275	0.192627	0.120215	0.545748	0.525134	0.159321	0.230916	0.134779	0.355788	0.328645	0.285941	1.35557	0.906418	1.14043	1.08558
A530016L24Rik	2.18081	7.12981	1.01363	33.0824	95.8235	0.0661663	2.45932	1.06035	21.764	94.3232	1.12349	4.79457	1.03699	27.4232	95.0734	0.0140146	0.071017	0.0711257	0.0411092	1.47867	44.6278	31.3968	48.8326	10.6349	62.6001
A530032D15Rik	0.05122	0.0761941	0.107571	0.164236	0.232084	0.0473978	0.153851	0.0840635	0.0595198	0.17935	0.0493089	0.115023	0.0958173	0.111878	0.205717	0.282925	0.717766	1.14098	0.330178	0.524268	0.478234	0.696246	1.19022	0.354729	1.04818
A530046M15Rik	0	0	0	0	0	0	0	0	0	0	0	0	0	0	0	0.383229	0.0258928	0	0.0249807	0	0	0	0	0	0
A530050N04Rik	0	0	0	0	0	0	0	0	0	0.0632668	0	0	0	0	0.0316334	0	0	0	0	0	0.152523	9.14618	0	9.00161	0
A530053G22Rik	0	0	0	0	0.213271	0	0	0	0	0.367081	0	0	0	0	0.290176	0	0	0	0	0	0.024582	0.28756	0.0940038	0.647923	1.47822
A530054K11Rik	0.547619	1.27503	1.06751	0.503128	0.651107	0.264159	0.774211	0.668611	0.480547	0.53446	0.405889	1.02462	0.868061	0.491837	0.592784	1.93899	4.06065	4.65421	2.19009	2.05971	2.43965	0.475775	0.753609	0.949504	2.45589
A530058N18Rik	0	0	0	0	0	0	0	0	0	0	0	0	0	0	0	0	0	0	0	0	0	0	0.0868877	0	0
A530064D06Rik	0	0	0	0	0	0	0	0	0	0	0	0	0	0	0	0.0450805	0.0228431	0.0381315	0.0110183	0.0110089	0.0202237	0	2.0114e-07	0.0115871	0.664775
A530065N20Rik	0	0	0.0258796	0	0	0	0.00333729	0.00227005	0	0	0	0.00166865	0.0140748	0	0	0	0	0	0	0	0.0173369	0.744119	0	0.417224	0.0124112
A530072M11Rik	0.0527573	0.0539557	0	0.218921	0.268322	0	0.200034	0.0340162	0	0.123156	0.0263787	0.126995	0.0170081	0.109461	0.195739	0.206812	0.503035	0.472316	0.0606644	0.343471	0.575248	0.0723756	0.354895	0.170122	0.31882
A530088E08Rik	0	0	0	0	0	0	0	0.0704695	0	0	0	0	0.0352348	0	0	0	0.0217106	0	0	0	0.0384423	0	5.46848e-08	0.0220271	0.0357742
A530099J19Rik	0	0	0	0	0	0	0	0	0	0	0	0	0	0	0	0	0	0	0	0	0	0	0.227733	0.027284	0.579495
A630001G21Rik	0	0.308035	0.0527133	0	0.0510619	0.0929056	0.108762	0	0	0	0.0464528	0.208398	0.0263566	0	0.025531	0.413243	0.438754	0.499346	0.0384816	0.0576732	0.158908	0.344342	1.21571	0.445149	1.08704
A630007B06Rik	NA	NA	NA	NA	NA	NA	NA	NA	NA	NA	NA	NA	NA	NA	NA	NA	NA	NA	NA	NA	NA	2.52659	2.9367	1.9516	7.31483
A630010A05Rik	0	0	0	0	0	0	0	0	0	0	0	0	0	0	0	0	0	0	0	0	0	0	0	0	0
A630012P03Rik	0	0	0	0	0	0	0	0	0	0	0	0	0	0	0	0	0	0	0	0	0	0	0	0	0
A630019I02Rik	0	0.00221327	0	0	0	0	0	0	0	0	0	0.00110663	0	0	0	0.0122339	0	0	0	0	0	2.65229e-08	2.31543e-07	5.92854e-12	1.32829e-07
A630020A06	0	0	0	0.00678802	0	0	0	0	0.02091	0	0	0	0	0.013849	0	0.0630263	0.239161	0.339909	0.0902883	0.170399	0.392569	0.0359201	0	0	0.0263615
A630023A22Rik	0	0	0	0	0	0	0.0416741	0	0	0	0	0.020837	0	0	0	0.301603	0.515777	0.0765336	0.0589799	0.203757	0.270617	0	0	0.0310122	0
A630023P12Rik	0	0	0	0	0	0	0	0	0	0	0	0	0	0	0	0	0	0	0	0.0754843	0.069328	NA	NA	NA	NA
A630033H20Rik	0.0310769	0.381964	0.196046	0.099733	0.0316112	0.141653	0.279863	0.052136	0.0248275	0.0488407	0.0863649	0.330914	0.124091	0.0622803	0.040226	4.91793	2.4176	2.58456	1.0792	2.19718	1.01705	0.00282002	0.00278021	0.140703	0.368371
A630066F11Rik	1.87e-08	0.269219	0	0.515867	0.0843035	0.0771234	0.693066	0.480937	0.200084	0.435308	0.0385617	0.481142	0.240469	0.357976	0.259806	0.519822	0.692967	0.828677	0.0641658	0.572066	0.768231	0.96522	0.374535	0.753888	0.847693
A630072M18Rik	0.2576	0.821466	1.0378	0.661417	0.630401	0.441679	0.385959	1.04137	0.94675	0.840904	0.349639	0.603712	1.03958	0.804083	0.735653	0.458105	1.11681	0.803727	0.573873	0.884974	0.80562	1.51508	0.844529	0.934642	1.67019
A630073D07Rik	0	0	0	0	0	0	0	0	0	0	0	0	0	0	0	0	0	0	0	0	0	0	0	0	0
A630075F10Rik	0.0131168	0	0	0.0108825	0	0	0.056902	0	0	0	0.0065584	0.028451	0	0.00544125	0	0.00411224	0.0243432	0.0232204	0.00538729	0.0040174	0.00676946	0.216209	0.141358	0.0476445	0.236581
A630076J17Rik	0	0	0	0.780737	0	0	0	0	0	0	0	0	0	0.390369	0	0	0	0	0	0	0	0	0.252631	0.0758385	0
A630077J23Rik	0	0.708445	0	0	0	0	0	0	0	0	0	0.354222	0	0	0	0	0	0	0	0	0.0812159	1.42414	0.931107	0.837647	0.63955
A630089N07Rik	0.368475	0.276866	0.663313	0.290201	0.137685	0.290179	0.195513	0.436373	0.324415	0.21504	0.329327	0.236189	0.549843	0.307308	0.176363	3.92977	2.71033	4.94214	5.77734	2.27077	2.12895	0.051587	0.0303549	0.0939642	0.204497
A630095E13Rik	0	0	0	0	0	0	0	0	0	0	0	0	0	0	0	0	0	0	0.0802804	0	0	0	0	0	0.738345
A630095N17Rik	0	0	0	0	0	0	0	0	0	0	0	0	0	0	0	0	0	0	0	0	0.0688565	0	0	0.236732	0
A730006G06Rik	0	0	0	0	0	0	0	0	0	0	0	0	0	0	0	0	0	0	0	0	0	NA	NA	NA	NA
A730008H23Rik	19.0552	15.7731	24.2857	9.32395	6.85114	9.42712	6.97362	17.6913	11.2854	7.37161	14.2412	11.3734	20.9885	10.3047	7.11137	4.33253	1.91409	2.05424	1.01117	2.22512	1.86902	3.52457	5.24264	0.298211	3.63843
A730017C20Rik	0	0	0	0	0	0	0	0	0	0	0	0	0	0	0	0	0	0	0	0	0	0	0.0727593	0	0.51799
A730017L22Rik	0.887747	0.474436	0.399521	1.03421	0.858878	0.759116	1.48383	0.938204	1.72814	1.31124	0.823431	0.979133	0.668863	1.38118	1.08506	2.00645	2.15057	3.1998	1.2458	1.70437	1.9962	0.793329	0.857125	0.314784	1.58744
A730018C14Rik	0	0	0	0	0	0	0	0	0	0	0	0	0	0	0	0	0	0.0186231	0	0	0	0.0770467	0	0	0
A730020E08Rik	0.305822	0	0	0	0.0303493	0.0552196	0.10697	0.0480937	0.0476728	0.278597	0.180521	0.053485	0.0240469	0.0238364	0.154473	0.0113618	0.00474143	0.00964326	0.00285901	0.00380875	0	0	0.160549	0.0781713	0.010017
A730020M07Rik	0	0	0	0	0.0816249	0	0	0	0	0	0	0	0	0	0.0408125	0.0904121	0.312701	0.255921	0.0949256	0.25071	0.485141	0.179779	2.96849e-14	0.702822	2.35679
A730036I17Rik	0	0.0826164	0	0	0	0	0	0	0	0	0	0.0413082	0	0	0	0	0	0	0.010321	0.0103121	0	0	0	0	0
A730043L09Rik	0	0	0	0	0	0	0	0	0	0	0	0	0	0	0	0	0.0345053	0	0	0	0.0305487	0	0.116792	0	0
A730046J19Rik	0	0	0	0	0	0	0	0	0	0	0	0	0	0	0	0	0.0230137	0.00640248	0	0	0	0	0	0	1.08908
A730056A06Rik	1.25824	0.770973	0.33962	1.52808	0.197838	0.585059	0.105554	0.250215	0.698571	0.366322	0.92165	0.438263	0.294917	1.11333	0.28208	0.241724	1.48855	2.30923	0.236175	1.52038	1.43911	5.26139e-05	5.14413e-05	0.065208	0.270456
A730082K24Rik	0	0	0	0	0	0	0	0	0	0	0	0	0	0	0	0	0	0	0	0	0	0	0	0	0
A730085A09Rik	NA	NA	NA	NA	NA	NA	NA	NA	NA	NA	NA	NA	NA	NA	NA	NA	NA	NA	NA	NA	NA	0	0	0	0.0200483
A730085K08Rik	0	0.245557	0	0	0	0	0.130053	0	0	0.140123	0	0.187805	0	0	0.0700615	0	0.0953897	0.238839	0.184059	0.367804	0.253355	0.328485	0	0.09678	0.241829
A730090H04Rik	0	0.0609445	0	0	0	0	0	0	0	0.0347769	0	0.0304722	0	0	0.0173884	5.62479e-09	4.48911e-09	0.0203288	2.88287e-09	0.0238109	7.04997e-10	0	0	0	0.420135
A730090N16Rik	0.221224	0	0.387175	0	0	0	0.0399423	0	0	0	0.110612	0.0199712	0.193587	0	0	0.202349	0.175779	0.268962	0.282645	0.141202	0.103749	0.202263	0.0991801	0	0
A730098P11Rik	5.73665	13.9174	16.4888	8.70148	7.58749	8.66447	11.7495	7.66255	6.02232	3.98964	7.20056	12.8334	12.0757	7.3619	5.78857	26.069	32.5173	31.3596	25.2384	28.1564	24.0182	10.2183	15.5778	11.3529	25.608
A830009L08Rik	0.0668051	0.102484	0	0	0.10193	0	0	0.0215369	0	0.0194936	0.0334026	0.051242	0.0107685	0	0.0607118	0	0.0398112	0.0221511	0	0.025584	0.082241	0	0.0449521	0.148102	0.0841068
A830010M20Rik	0.0663558	0.136774	0.139355	0.09637	0.188984	0.0702248	0.172516	0.119792	0.116623	0.116171	0.0682903	0.154645	0.129574	0.106496	0.152578	0.457793	1.07555	1.34649	0.132251	0.29477	1.32563	0.619346	0.893229	0.596698	2.0918
A830011K09Rik	0	0	0	0	0	0	0	0	0	0	0	0	0	0	0	0	0	0	0.0153994	0	0	NA	NA	NA	NA
A830018L16Rik	0	0	0	0	0	0	0	0	0	0	0	0	0	0	0	0.000952025	0.0133863	0.00161092	0	0	0	0.00382208	0.0038072	1.41165	0.397102
A830019L24Rik	0	0	0	0	0	0	0	0	0	0	0	0	0	0	0	0	0	0	0	0	0	0	0	0	0
A830052D11Rik	0	0	0	0	0	0.0868796	0.152561	0.181603	0	0	0.0434398	0.0762805	0.0908015	0	0	0.220822	0.223797	0.353109	0.0719713	0.14382	0.231158	0.643602	0.37871	1.1353	0.378243
A830080D01Rik	0.274977	0.928036	0.721876	1.05546	0.223763	0.407131	0.625558	0.531888	0.593137	0.465378	0.341054	0.776797	0.626882	0.824299	0.344571	4.89378	5.93198	5.59367	3.74157	5.23373	3.71397	0.867949	0.777183	0.842361	2.49259
A830082K12Rik	0.609308	0.292049	0.404457	0.0896981	0.272494	0.76922	0.790609	0.281699	0.0514793	0.198862	0.689264	0.541329	0.343078	0.0705887	0.235678	2.38744	1.51613	1.56424	0.645498	0.928217	0.377225	1.7091e-09	0.061827	0.0435983	0.525417
A830082N09Rik	0	0.0815185	0.167401	0.106314	0.0360348	0.0105371	0.0801806	0.0305911	0.036388	0.00664531	0.00526855	0.0808496	0.0989961	0.071351	0.0213401	0.117281	0.123875	0.234433	0.268778	0.307786	0.122076	0.0312612	0.061316	0.0555948	0.227327
A930001A20Rik	0.0748165	0	0	0.0776143	0.0761028	0	0	0	0	0	0.0374082	0	0	0.0388071	0.0380514	0	0	0	0	0	0	2.63325e-06	0	0	0
A930001C03Rik	1.14256	0.998731	0.790428	0.688421	3.78e-05	0.202073	0.835953	0.808458	0.553813	0.447707	0.672316	0.917342	0.799443	0.621117	0.223872	1.41592	3.43435	2.15938	0.635932	2.61914	0.611053	1.84355e-09	4.36044e-10	0.218538	0.16633
A930002C04Rik	0	0	0	0	0	0	0	0	0	0	0	0	0	0	0	0	0	0	0	0	0	NA	NA	NA	NA
A930003A15Rik	0	0	0	0	0	0	0	0	0	0	0	0	0	0	0	0	0	0	0	0	0	0	0	0.171983	0
A930003O13Rik	0.00829464	0	0	0.0516289	0	0	0	0	0.0397583	0	0.00414732	0	0	0.0456936	0	0	0	0.0103193	0	0.0190593	7.33763e-28	0.0682775	0.20088	0.0401206	1.05057e-27
A930004D18Rik	3.40977	6.43774	1.56369	0.579632	0.814304	3.73963	6.2316	2.69918	0.641676	0.813607	3.5747	6.33467	2.13144	0.610654	0.813956	4.26534	5.16499	6.03956	1.60333	1.64977	2.30052	1.42116	1.45072	0.599419	1.32604
A930005H10Rik	7.03452	26.5041	23.4153	12.5773	10.0908	4.50336	21.3681	16.0462	9.24816	14.0018	5.76894	23.9361	19.7308	10.9127	12.0463	2.89909	6.67736	10.469	4.86984	8.31721	7.74411	10.6114	8.67366	17.526	7.65383
A930006I01Rik	0	0	0	0	0	0	0.046513	0	0	0	0	0.0232565	0	0	0	0	0	0	0	0	0	0	0	0.0346131	0
A930006K02Rik	0	0	0	0	0	0	0	0	0	0	0	0	0	0	0	0.0593676	0.541507	0.502162	0.116096	0.347991	0.90556	NA	NA	NA	NA
A930007I19Rik	0.041148	0.168331	0.0864182	0.12806	0	0	0.044576	0.0795926	0.0328733	0.0240138	0.020574	0.106454	0.0830054	0.0804667	0.0120069	0.0967814	0.114433	0.150082	0.126174	0.157582	0.217095	0.112918	0.0553694	0.0331717	0.124332
A930009A15Rik	0	0	0	0	0	0	0	0	0	0	0	0	0	0	0	0	0	0	0	0	0	0	0	0	0
A930011G23Rik	0	0	0	0	0	0	0	0	0	0	0	0	0	0	0	0	0	0	0	0	0	0	0	0	0
A930011O12Rik	0	0	0	0	0	0	0	0	0	0	0	0	0	0	0	0	0	0	0	0	0	0	0	0	0
A930012L18Rik	0.0805054	0.135069	3.66e-243	0	0	0.113656	0.0474251	6.2e-212	0	6.6e-64	0.0970807	0.091247	3.1017e-212	0	3.29852e-64	0.0982043	0.166103	0.193031	0.0816787	0.0325321	0.0468308	0.394256	0.145271	0.0526385	0.111722
A930013F10Rik	0.274031	0.640583	0.452189	0.406111	0.278742	0.144904	0.826967	0.429094	0.781873	0.205615	0.209468	0.733775	0.440642	0.593992	0.242178	1.39648	2.72172	3.46576	2.26573	1.55917	1.81755	0.268576	0.526787	1.92508	1.20258
A930015D03Rik	1.02271	1.19537	2.3013	1.66722	0.891682	2.23079	1.02878	1.93114	2.27607	0.724748	1.62675	1.11207	2.11622	1.97165	0.808215	13.0868	10.0997	11.9657	22.9879	20.3105	8.45343	2.30181	2.25739	1.8256	0.956491
A930016O22Rik	0	0	0.00326992	0.00381857	0	0.00937367	0	0	0.00230975	0.00262602	0.00468684	0	0.00163496	0.00306416	0.00131301	0.0117233	0.0161021	0	0.00172471	0	0.00109527	0	0	0.170171	0.00166092
A930017M01Rik	0	0	0	0	0	0	0	0	0	0	0	0	0	0	0	0	0	0	0	0.0105842	0.019442	0.0379287	0	0.0891205	0
A930018P22Rik	0	0	0	0.146638	0.287564	0	0.153128	0.091139	0	0.0824922	0	0.076564	0.0455695	0.073319	0.185028	0	0.0561572	0.0937385	0.108358	0	0.0497178	1.54931	0	1.36742	0.640657
A930019D19Rik	0	0	0	0	0	0	0	0	0	0	0	0	0	0	0	0	0.13742	0.114692	0.044193	0.220776	0.283879	0.158028	0	0.0464742	0
A930024E05Rik	0.566579	0.158032	0.108175	0.0534333	0.209571	0.0953271	0.530084	0.365312	0	0.0901781	0.330953	0.344058	0.236743	0.0267167	0.149875	0.302867	1.10501	0.973486	0.157939	0.315607	0.307984	0	0.0692984	0.0830456	0.363143
A930041C12Rik	0	0	0	0	0	0	0	0	0	0	0	0	0	0	0	0	0.103693	0	0.200081	0.0999552	0.183606	0	0	0.210409	0
AA387883	0	0	0	0	0	0	0	0	0	0	0	0	0	0	0	0	0.0234179	0.0195447	0	0	0	0	0	0	0
AA388235	0	0	0	0	0	0	0	0	0	0	0	0	0	0	0	0	0.00188607	0.00262355	0.0164633	0.00303013	0.005566	0.26062	0.481896	0.167038	0.358613
AA413626	0	0	0	0	0	0	0.23643	0	0	0	0	0.118215	0	0	0	0	0.520242	0.434198	0.33461	0.167162	0.307058	NA	NA	NA	NA
AA414768	0	0	0	0	0	0	0	0	0	0	0	0	0	0	0	0.6514	0.848798	0.285333	0.31846	0.113639	0.208741	NA	NA	0.0956855	0.83683
AA415398	0.410356	0.891815	0.323183	1.54317	4.53935	0.189867	1.02801	0.826826	1.63918	2.93365	0.300111	0.959912	0.575005	1.59118	3.7365	0.583125	1.60991	2.34713	1.17965	1.08042	3.42796	1.63611	1.38025	2.81189	2.22153
AA465934	8.9128	15.8111	15.2765	22.8812	20.9596	26.484	6.60895	13.2269	17.9536	12.8209	17.6984	11.21	14.2517	20.4174	16.8903	2.57547	2.02335	2.24795	2.04417	3.01206	1.09027	5.05232	2.51017	4.84534	2.28588
AA467197	0	0	0	0	0	0	0	0	0	0	0	0	0	0	0	0.312608	0.871255	0.295648	0	0	0	0.272914	1.33822	0.241078	1.86739
AA474331	0.753293	0.642004	0.922864	1.69317	0.919492	0.0697079	1.87691	1.2952	1.50452	1.71451	0.4115	1.25946	1.10903	1.59885	1.317	0.344511	0.867893	1.85667	0.789199	1.47127	1.20114	1.13512	1.38309	1.03236	1.77032
AA536875	0	0	0	0	0	0	0	0	0	0	0	0	0	0	0	0.0201635	0	0	0	0	0.0180919	0	0	0	0
AA543186	0.0582729	0.187304	0.609005	0.322411	0.533473	0.208636	0.0345699	0.381092	0.758174	0.156274	0.133454	0.110937	0.495049	0.540292	0.344873	0.19667	0.451336	0.314214	0.369733	0.68865	0.47093	0.319743	0.47036	0.822098	0.322806
AA543401	0	0	0	0	0	0	0	0	0	0	0	0	0	0	0	0	0	0	0	0	0	NA	NA	NA	NA
AA545190	0	0	0	0	0	0	0	0	0	0	0	0	0	0	0	0	0	0	0	0	0	0	0	0	0
AA619741	0	0	0	0	0	0	0	0	0	0	0	0	0	0	0	0	0	0	0	0	0	0	0	0	0
AA792892	0	0.0110261	0.0150949	0.0223686	0.0125331	0	0	0.0139027	0	0.0352343	0	0.00551305	0.0144988	0.0111843	0.0238837	0.0105187	0.0048951	0.00408549	0.00300533	0.00963388	0	0	0	0	0.00982452
AA986860	1.54287	2.8271	2.90277	2.60091	3.40035	0.773355	3.06424	2.7564	2.08002	2.96385	1.15811	2.94567	2.82958	2.34047	3.1821	0.365408	0.727891	0.841979	0.295684	0.837057	1.26624	1.19094	0.519095	0.893974	0.938852
AA987161	0.231563	0.873686	0.438678	0.420389	0.375598	0.225866	0.54866	0.286503	0.278746	0.3331	0.228714	0.711173	0.36259	0.349567	0.354349	2.2891	2.82008	3.19401	1.83162	1.64634	1.71085	0.3436	0.360137	1.15222	2.89518
Aaas	105.066	67.5165	51.653	28.7595	22.2742	86.8443	45.4868	29.316	20.1658	11.426	95.9552	56.5016	40.4845	24.4627	16.8501	66.8189	59.4408	41.8124	22.5336	29.9709	23.7893	5.99323	4.57145	4.97849	5.29652
Aacs	114.651	51.6942	69.93	90.7152	326.274	51.2185	52.5045	57.0049	74.7034	309.289	82.9347	52.0994	63.4674	82.7093	317.781	26.6449	40.4185	14.245	24.0771	19.4695	73.1231	69.0042	40.8322	44.3482	41.4414
Aadac	0	0	0	0.0827443	0	0	0	0	0	0.0465485	0	0	0	0.0413722	0.0232742	0	0	0	0	0	0	0	0	0	0
Aadacl2	0	0	0	0	0	0	0	0	0	0	0	0	0	0	0	0	0	0	0	0	0	0	0	0	0
Aadacl3	0	0	0	0	0	0	0	0	0	0	0	0	0	0	0	0	0	0	0	0	0	0	0	0	0
Aadat	0.110335	0.112841	0	0	0	0.0510505	0	0	0	0	0.0806927	0.0564205	0	0	0	0	0	0	0	0	0	0	0	0	0
Aaed1	2.26394	4.51497	4.63582	1.76145	4.95116	5.13275	4.96641	2.26256	1.80867	4.55823	3.69835	4.74069	3.44919	1.78506	4.75469	10.1172	18.8881	19.3674	5.51022	8.5834	14.7713	16.9117	13.6943	12.0456	23.7143
Aagab	8.96317	10.7255	10.6696	7.00199	9.04344	13.197	10.9089	13.9682	9.21907	7.85689	11.0801	10.8172	12.3189	8.11053	8.45017	11.6077	11.2739	11.0397	8.31756	11.2427	11.3214	8.26584	9.47368	6.53824	12.8013
Aak1	2.40874	3.63771	3.84909	1.95743	1.14034	1.8791	3.71953	5.64876	2.36621	1.20227	2.14392	3.67862	4.74892	2.16182	1.17131	5.08388	6.91788	8.05363	8.60939	5.29589	4.27351	2.0827	2.09162	1.48454	3.20891
Aamdc	2.37757	6.22761	5.61751	7.55132	11.6793	4.43522	7.39442	4.77598	5.13743	7.18659	3.40639	6.81102	5.19674	6.34438	9.43295	3.68723	10.3911	12.2243	7.49017	11.3248	18.2106	17.5983	0.590656	36.0208	38.8141
Aamp	155.645	143.65	149.11	221.053	165.72	107.939	137.843	135.788	172.325	135.876	131.792	140.746	142.449	196.689	150.798	61.2879	72.2868	61.9585	70.4238	91.6362	79.7688	49.7725	67.5139	36.3438	57.5399
Aanat	0	0	0	0	0	0	0.0409793	0	0	0	0	0.0204897	0	0	0	0	0.030058	0.023044	0	0	0.0266113	1.22129e-05	1.28336e-05	0.0609955	0
Aar2	27.7477	20.599	32.0135	26.1107	21.7784	23.3641	17.9389	23.0681	22.6571	17.2031	25.5559	19.269	27.5408	24.3839	19.4907	7.84061	7.72048	7.90146	8.13002	8.20344	5.87385	1.85434e-05	1.07347e-05	2.65849	4.99829
Aard	0	0	0	0	0	0	0	0	0	0	0	0	0	0	0	0	0	0	0	0	0	0	0.204421	0	0.727164
Aars	142.635	144.474	200.749	167.091	91.5958	127.16	120.062	78.8386	153.887	77.1904	134.898	132.268	139.794	160.489	84.3931	137.044	187.92	139.324	64.0664	52.092	92.6195	13.1378	15.0124	7.52643	22.361
Aars2	18.0254	10.3201	9.2319	10.7837	10.1519	8.87738	9.71861	8.46708	8.48132	7.92192	13.4514	10.0194	8.84949	9.63251	9.03691	4.95274	4.41537	3.87761	2.98824	4.28796	4.38555	10.3199	3.57203	4.80289	2.2833
Aarsd1	36.1161	35.5977	34.0437	61.3127	45.0401	26.0812	19.7363	17.4276	36.9741	22.6127	31.0986	27.667	25.7356	49.1434	33.8264	15.8482	16.0923	12.2307	12.6476	22.7227	16.59	28.3021	16.5707	16.6993	14.0449
Aasdh	0.473356	1.52876	1.07262	1.39564	1.3938	0.645521	1.38993	1.52602	2.10977	1.58479	0.559438	1.45934	1.29932	1.7527	1.4893	1.23054	1.98946	2.53606	1.25094	2.47112	2.27834	1.2309	1.30775	1.9582	2.97348
Aasdhppt	1.50021	1.86783	3.8014	4.1276	3.74865	2.71616	1.53687	2.27102	3.99074	2.05556	2.10819	1.70235	3.03621	4.05917	2.90211	10.9329	7.60781	6.78642	12.4025	11.9166	9.64863	2.55098	2.67731	5.13996	8.12982
Aass	0	0	0	0	0	0	0	0	0	0	0	0	0	0	0	0	0	0	0	0	0	0	0.100395	0.010022	0.250424
Aatf	10.9497	16.714	21.9094	11.1896	8.14565	25.7599	12.452	16.4733	10.6192	3.33816	18.3548	14.583	19.1913	10.9044	5.74191	44.0979	26.4473	20.6461	36.6657	27.5488	10.3661	6.72584	5.57	6.41176	7.29741
Aatk	0.209765	0.429063	0.0183524	3.89889	21.6931	0.097054	0.208231	0.0450816	2.59757	22.3008	0.15341	0.318647	0.031717	3.24823	21.9969	0.00685108	0	0	0.013399	0.020082	4.48841	4.66695	13.8169	1.64878	3.45086
AB099516	NA	NA	NA	NA	NA	NA	NA	NA	NA	NA	NA	NA	NA	NA	NA	NA	NA	NA	NA	NA	NA	7.3228e-07	5.46002e-07	4.80987e-08	1.74419e-07
AB124611	0	0.526629	0.180235	0.178056	0	0	0.371889	0.276675	0	0.250426	0	0.449259	0.228455	0.089028	0.125213	0.201856	0.987912	1.56515	0.230265	0.30192	0.415867	0.353026	0.000446117	1.20735	5.21267
Abat	0.101976	0.688356	0.278426	0.346079	0.29045	0.0754916	0.386665	0.265741	0.114058	0.206145	0.0887338	0.537511	0.272083	0.230069	0.248298	0.391772	0.996681	1.10216	0.633492	0.390548	1.0974	1.78232e-05	2.64115	0.255128	17.1238
Abca1	0.0432331	1.3353	3.00539	10.1719	8.82165	0.0560096	2.32301	2.33595	12.5722	12.1914	0.0496214	1.82916	2.67067	11.372	10.5065	0.349121	3.83367	3.46338	6.61841	6.08957	28.9044	7.38289	11.9549	4.8933	42.1135
Abca12	0	0.0328582	0	0	0	0	0	0	0	0	0	0.0164291	0	0	0	0.00839633	0.00425473	0.00355103	0	0	0	0	0	0	0
Abca13	0	0	0	0	0	0	0.00297952	0	0	0	0	0.00148976	0	0	0	0.00431267	0.00437077	0.00182394	0.00632521	0.0147462	0.00386959	0	0.0074058	0	0.0083105
Abca14	0	0	0	0	0	0	0	0	0	0	0	0	0	0	0	0	0	0	0	0	0.005904	0	0	0	0
Abca15	0	0	0	0	0	0	0	0	0	0	0	0	0	0	0	0.00664287	0	0.00561888	0	0	0	0	0	0	0
Abca16	0	0	0	0	0	0	0	0	0	0	0	0	0	0	0	0.00698739	0.0283263	0.00653249	0	0.00754486	0.00692952	0	0	0	4.32462e-06
Abca17	0.32184	0	0.0091341	0.108284	0.123871	0.0804928	0.0659613	0.0168253	0.138984	0.106603	0.201166	0.0329807	0.0129797	0.123634	0.115237	0.00681963	0.0172788	0.0403788	0.0100021	0.0133247	0.0275355	0.334296	0.327845	0.0666164	0.254067
Abca2	16.1129	3.45197	2.25445	5.61391	11.6621	3.43065	3.0271	2.14774	4.70348	8.83509	9.77177	3.23954	2.2011	5.15869	10.2486	1.39255	3.13917	4.83632	1.4634	1.49181	3.39033	16.3	7.07651	6.43677	12.8431
Abca3	17.3674	1.20603	0.694617	10.3861	9.30265	4.59331	4.57446	1.91354	11.6557	9.03553	10.9804	2.89025	1.30408	11.0209	9.16909	1.47333	2.41854	2.7789	0.812201	1.59882	2.16281	1.20946	0.343423	3.65193	19.1783
Abca4	0.0123438	0.0504968	0	0	0.0502241	0.0114227	0.0601748	0.00795889	0.0197231	0.0288152	0.0118832	0.0553358	0.00397944	0.00986155	0.0395197	0.0145165	0.0294242	0.0163718	0.00946257	0	0.0217085	0.152496	0.116319	0.00497551	0.857848
Abca5	0.247967	0.540277	0.498133	0.458557	0.164498	0.329229	0.946026	0.57001	0.0947443	0.119545	0.288598	0.743151	0.534072	0.276651	0.142021	3.76561	5.30262	4.5829	2.83478	1.69694	1.90362	0.680769	0.566037	0.443256	2.036
Abca6	0	0	0	0	0	0	0.00467783	0	0	0	0	0.00233892	0	0	0	0	0.00686209	0.0314993	0.0268919	0	0.0303795	0	0.228301	0.142734	6.10837
Abca7	31.8815	16.1985	12.0597	17.4473	15.3221	3.92862	14.0479	11.1335	15.7409	17.0217	17.9051	15.1232	11.5966	16.5941	16.1719	1.57355	3.53008	3.41546	1.34039	2.24249	3.52014	7.22831	4.83579	1.80448	2.59024
Abca8a	0.016066	0.279326	0	0	0.351358	0	0.0913734	0	0.0128352	0.290658	0.008033	0.18535	0	0.0064176	0.321008	0.0125959	0.0765938	1.88315	0.107765	0.123054	2.55704	2.0288	7.82884	4.56224	25.343
Abca8b	0.0873279	0.193508	0.0458511	0.0754946	0.36272	0.0134685	0.697698	0.168919	0.0232556	0.161387	0.0503982	0.445603	0.107385	0.0493751	0.262053	0.287177	2.71984	4.08876	0.651032	0.582475	0.720972	0.998906	2.42948	0.932798	6.50079
Abca9	0.243757	0.821204	0.0451706	0.104124	0.277118	0	0.982474	0.342068	0.0343656	0.242671	0.121879	0.901839	0.193619	0.0692448	0.259894	0.0168625	0.489904	2.24645	0.41494	0.488717	0.388338	0.177135	1.4959	0.314987	11.8458
Abcb10	5.48992	4.48737	3.91747	6.11301	6.96421	7.51249	6.44098	5.07042	8.22997	8.86947	6.5012	5.46418	4.49395	7.17149	7.91684	5.63363	5.21269	4.73711	4.67565	5.64576	6.40429	6.89486	4.36522	3.75931	4.24846
Abcb11	0	0	0	0	0	0	0	0	0	0	0	0	0	0	0	0.0290637	0.0662744	0.0921885	0.0213133	0	0.00651943	0	0	0	0
Abcb1a	0.300578	0.027946	0.216799	0.0566941	0.0247067	0.292195	0.110184	0.369987	0.0363838	0.0265782	0.296386	0.069065	0.293393	0.046539	0.0256425	2.14352	1.04459	0.495306	0.562081	0.118599	0.133488	4.97988	9.83297	1.00229	5.24901
Abcb1b	1.50165	0.569197	1.04389	0.239662	0.0712105	4.86518	0.752703	1.76716	0.109061	0.140952	3.18342	0.66095	1.40552	0.174362	0.106081	15.3462	5.87268	2.92133	4.06253	1.03353	0.405058	6.93729	6.48775	2.39573	6.45874
Abcb4	0	0	0.0078622	0	0.00761588	0.00692844	0.00811091	0.0144824	0	0.0131084	0.00346422	0.00405546	0.0111723	0	0.0103621	0.518029	0.248375	0.122888	0.153533	0.0473108	0.00263347	3.39618	2.04071	1.23583	0.392132
Abcb5	0	0	0	0	0	0	0	0	0	0	0	0	0	0	0	0	0	0	0	0	0	0	0	0	0
Abcb6	19.2118	13.1314	14.1855	47.2641	60.9597	17.8961	6.19538	8.91546	30.5696	48.9383	18.554	9.66339	11.5505	38.9168	54.949	5.53283	4.51881	2.81009	4.21308	6.8816	12.7304	12.1983	4.15914	6.80637	6.72275
Abcb7	0.422616	0.728364	1.14234	1.44516	1.68768	0.608345	0.873257	0.769529	1.04415	1.15554	0.515481	0.80081	0.955935	1.24466	1.42161	4.16317	3.82128	2.53273	1.46447	3.04512	4.1346	0.945324	0.927083	1.53312	3.31853
Abcb8	16.4932	14.8528	9.27706	37.253	83.2375	7.64593	15.096	6.82316	29.7551	73.0898	12.0696	14.9744	8.05011	33.504	78.1637	5.51867	8.4716	6.68059	1.6931	6.02425	19.7173	37.3298	10.3926	23.044	12.787
Abcb9	0.638912	4.03419	0.204192	0.0576351	0.0282564	0.179941	2.88893	0.143287	0.0665778	0.129693	0.409427	3.46156	0.173739	0.0621065	0.0789747	0.849376	2.17412	2.99353	1.55452	3	5.61813	7.16704	3.51437	3.10157	4.07088
Abcc1	29.8125	19.1628	13.6774	18.3203	19.6457	39.1143	38.2569	28.349	26.4718	19.5766	34.4634	28.7098	21.0132	22.396	19.6111	24.3487	16.3407	14.785	17.466	12.829	18.1677	6.3308	7.96503	5.97475	14.2188
Abcc10	5.79799	3.77647	3.84531	4.29214	3.58388	2.33842	3.90178	6.56424	4.61924	3.6819	4.0682	3.83913	5.20477	4.45569	3.63289	2.37309	2.86541	3.87215	4.08303	3.42521	2.93003	4.56538	1.33313	8.92831	1.27314
Abcc12	0.0201878	0.0412927	0.021199	0	0	0	0.0328044	0	0	0	0.0100939	0.0370485	0.0105995	0	0	0.00791372	0.048122	0.0334692	0.00773781	0	0.00710067	0.0831239	0.0543467	0.00813723	0.0203329
Abcc2	0	0	0	0.0695858	0.051173	0	0	0.0108123	0.0133971	0.0391461	0	0	0.00540615	0.0414914	0.0451595	0	0.00666225	0	0	0	0.165153	0	0.0225732	0.0202781	0.00844498
Abcc3	0.0906096	0.148269	0.0951483	0	0.036867	0	0.274843	0.081791	0.0144777	0.0211517	0.0453048	0.211556	0.0884696	0.00723885	0.0290093	0.0639351	0.374379	0.198292	0.0555679	0.124921	0.0318702	0.22386	1.60996	0.0730454	6.5708
Abcc4	3.13344	3.13752	5.28867	7.86265	15.8695	4.78294	5.16292	8.32456	13.1324	17.5155	3.95819	4.15022	6.80661	10.4975	16.6925	4.8361	4.73833	3.82979	8.52032	8.94026	4.76044	2.12346	3.10866	2.79124	2.14871
Abcc5	7.98239	7.30675	6.08823	19.0486	14.9846	8.25659	14.8928	6.72916	18.1695	26.0605	8.11949	11.0998	6.40869	18.609	20.5225	11.0912	19.7313	24.2811	7.9948	8.93453	28.7476	5.09987	6.28107	3.43839	12.0136
Abcc6	0	0	0	0	0	0	0.00990667	0	0	0	0	0.00495333	0	0	0	0	0	0.00606446	0	0	0	0	0	0	0.0184212
Abcc8	0	0	0.0384601	0	0	0	0.00991919	0	0	0.0106872	0	0.00495959	0.01923	0	0.0053436	0	0.00727542	0.00607212	0	0	0	0.276487	0.147901	0.162392	0.00922222
Abcc9	0	0	0	0	0.000938209	0	0.000499596	0.00070283	0	0.00708268	0	0.000249798	0.000351415	0	0.00401044	0.000335741	0.00145343	0.00329055	0.00632902	0.0022942	0.00239368	3.40738e-06	0.466576	4.04973	5.56092
Abcd1	44.3305	82.1638	38.2976	36.5931	49.2146	10.5954	51.1762	28.1796	22.2707	40.1161	27.4629	66.67	33.2386	29.4319	44.6653	3.10242	8.00641	9.47774	3.72146	7.29075	8.32234	11.869	10.7249	9.46052	10.0256
Abcd2	0.195538	0.0499949	0.136888	0.0845209	1.37572	0.0150789	0.176523	0.147089	0.0143198	0.437441	0.105308	0.113259	0.141988	0.0494204	0.906581	0.127753	0.407845	0.799647	0.0624568	0.338712	20.5786	10.1766	26.6067	5.57973	144.172
Abcd3	2.12267	7.48677	7.91578	11.1231	23.4878	2.24128	5.33603	4.43926	7.04413	19.3122	2.18197	6.4114	6.17752	9.08361	21.4	14.9777	19.3907	18.0199	17.8784	33.2354	27.7202	28.3839	10.402	33.6755	24.593
Abcd4	9.02313	4.0222	2.56454	6.46077	9.98408	6.269	11.7382	7.72445	8.70911	7.43243	7.64607	7.8802	5.1445	7.58494	8.70825	7.45888	12.2064	7.36162	2.47339	9.86286	14.8711	9.24445	4.4323	9.12772	4.51448
Abce1	5.50503	8.89478	20.783	16.5203	8.71196	14.5135	5.04366	7.72027	11.1057	4.18988	10.0093	6.96922	14.2516	13.813	6.45092	108.237	52.9205	44.2611	88.9215	73.1131	54.1003	5.2573	6.08001	13.8672	21.7659
Abcf1	27.1821	33.6251	54.67	50.8554	25.608	30.2609	25.8817	36.4414	42.135	16.604	28.7215	29.7534	45.5557	46.4952	21.106	58.8658	43.7709	36.1401	65.9285	63.6004	40.745	25.5975	25.8186	17.8088	25.0738
Abcf2	59.5399	61.3573	100.263	70.9892	35.1487	91.9885	39.8232	83.1842	71.0901	33.2229	75.7642	50.5902	91.7236	71.0396	34.1858	60.6064	29.0747	22.96	52.0781	42.3615	26.1733	0.000813124	0.00024184	8.30664	14.6226
Abcf3	17.3106	16.4063	27.9178	24.3631	18.4112	17.1667	14.4692	24.8675	20.8794	14.627	17.2386	15.4377	26.3926	22.6212	16.5191	12.0244	14.225	13.0314	22.5525	19.7801	15.8084	9.3632	9.22047	8.67074	10.0663
Abcg1	0	0	0.0487913	0.851557	7.21543	0	0.00838912	0	0.197974	4.72724	0	0.00419456	0.0243957	0.524765	5.97133	0.0849991	0.283045	0.148929	0.118728	0.865976	12.2244	2.86995	5.75424	2.33482	7.52667
Abcg2	1.74881	2.48839	1.87633	5.75812	5.83934	5.55853	3.85078	1.44624	4.52549	2.61805	3.65367	3.16959	1.66128	5.1418	4.2287	34.061	34.89	26.3651	20.9033	27.8958	15.01	6.41642	11.1527	7.89187	8.09853
Abcg3	0	0	0	0	0	0	0	0	0	0	0	0	0	0	0	0	0	0	0	0	0	0.126485	0.578875	0.111455	1.70194
Abcg4	0.127043	0.1819	0	0.237228	0.0258453	0.0470249	0.0550506	0.0327652	0.142093	0.0444849	0.0870339	0.118475	0.0163826	0.189661	0.0351651	0.278888	0.423968	0.219048	0.223994	0.252995	0.232361	0.174354	0.718158	0.0614496	1.11322
Abcg5	0	0	0	0	0	0	0	0.0272266	0	0	0	0	0.0136133	0	0	0	0	0	0.0161853	0	0.0148526	0	0	0.0170208	0.27645
Abcg8	0	0	0	0	0	0	0.0293322	0	0	0	0	0.0146661	0	0	0	0.0424577	0.0215142	0.0203954	0.124545	0.0311086	0.0108171	0	0.0338911	0.0101497	0.114127
Abhd1	54.3401	11.8334	60.959	138.919	739.266	22.513	23.8847	68.8694	87.0831	593.97	38.4265	17.859	64.9142	113.001	666.618	5.03006	3.81404	1.45714	5.82679	2.51701	31.5179	9.22357e-06	3.88221e-06	0.551022	0.377624
Abhd10	1.30599	3.16298	4.41056	3.48497	4.93814	3.45234	2.52467	2.04415	4.92036	2.81421	2.37916	2.84382	3.22736	4.20266	3.87617	8.66786	7.11549	7.89414	6.22023	6.49831	7.86682	2.85352	3.10264	3.85919	5.25974
Abhd11	38.2244	33.8361	28.965	86.6962	112.07	40.2218	47.7597	27.0279	74.9553	85.4178	39.2231	40.7979	27.9964	80.8257	98.7439	18.2606	15.7481	12.6899	19.5122	23.7607	41.52	8.89631	4.49966	45.0839	25.1701
Abhd11os	1.76168	1.20113	0.308321	0.304593	0.895983	1.63022	0.477111	0.757249	2.11112	2.05622	1.69595	0.839121	0.532785	1.20786	1.4761	0.230196	0.116649	0.292068	0.787778	0.224887	0.413092	NA	NA	NA	NA
Abhd12	95.7721	128.075	93.2157	137.059	197.947	56.3149	121.034	91.5768	92.0754	168.051	76.0435	124.555	92.3962	114.567	182.999	40.0564	42.81	40.2101	37.2002	39.1326	49.6791	20.4328	24.0197	27.1736	49.1245
Abhd12b	0	0	0	0	0	0	0	0	0	0	0	0	0	0	0	0	0	0	0	0	0.0349071	0	0.13343	0	0
Abhd13	0.961069	1.73501	3.54415	2.81586	1.99811	3.12323	1.36385	2.47551	2.76771	2.41782	2.04215	1.54943	3.00983	2.79178	2.20797	7.63327	5.30647	5.31576	10.4103	7.55512	7.33891	0.883485	2.49991	2.1882	6.19788
Abhd14a	27.0844	12.3541	13.6417	32.7422	18.6232	25.3941	15.8971	10.5505	20.9957	12.2864	26.2392	14.1256	12.0961	26.869	15.4548	9.03331	10.3849	12.3178	7.92209	10.381	8.314	1.95512	3.70781	4.43525	13.1521
Abhd14b	53.9709	22.0368	10.4154	23.7014	35.8338	27.4721	59.9863	19.759	15.9574	33.1339	40.7215	41.0115	15.0872	19.8294	34.4838	15.4722	33.9158	30.756	10.068	16.5299	16.1201	13.2285	17.7578	19.7141	29.9009
Abhd15	0.0571084	0.613259	3.29829	58.6446	45.139	0.211387	0.433062	2.79844	50.7749	55.626	0.134248	0.523161	3.04836	54.7097	50.3825	0.171632	0.192851	0.370111	1.09446	7.13707	21.1555	5.83874	6.14881	2.65871	18.0101
Abhd16a	69.0661	67.1109	61.0936	91.6981	140.101	41.8687	54.1268	61.6616	58.0498	121.124	55.4674	60.6189	61.3776	74.8739	130.613	15.857	20.9315	24.5402	14.7963	24.633	33.7867	40.3539	42.3972	21.9411	35.7371
Abhd16b	0.0553429	0.1132	0	0.344474	0.281472	0	0.0599535	0.178416	0.221068	0.161489	0.0276715	0.0865767	0.089208	0.282771	0.22148	0.0650841	0.241857	0.146804	0.106062	0.211944	0.311453	0.303679	0.0744548	0.156152	0.0557408
Abhd17a	269.047	176.432	235.4	271.823	203.843	260.825	189.464	192.026	200.383	185.722	264.936	182.948	213.713	236.103	194.782	35.7737	32.3633	33.3033	42.699	41.613	33.6647	NA	NA	NA	NA
Abhd17b	0.803993	1.52705	3.33686	1.94614	2.49239	2.58627	2.38481	2.46852	1.86577	2.83758	1.69513	1.95593	2.90269	1.90596	2.66499	11.6163	11.575	10.7904	26.0179	16.8906	14.126	NA	NA	NA	NA
Abhd17c	9.48962	6.81986	12.4786	9.48973	8.69619	22.6261	10.3265	11.6584	9.93766	8.03274	16.0579	8.57318	12.0685	9.71369	8.36446	19.7729	10.3933	12.2744	14.4673	14.6841	9.39695	NA	NA	NA	NA
Abhd2	7.02276	6.32569	15.5271	3.17482	3.24407	9.77786	10.7312	28.7469	8.10694	4.26765	8.40031	8.52844	22.137	5.64088	3.75586	7.58959	9.49642	14.0998	43.0189	8.95668	4.15842	8.44355	9.49454	1.06477	12.3133
Abhd3	0	0.211335	0.433984	1.17903	2.04939	0.0956103	0.195874	0.333088	2.10485	2.05011	0.0478051	0.203604	0.383536	1.64194	2.04975	0.0810044	0.472051	0.479624	0.118806	0.296761	1.56266	0.85046	2.15463	0.5414	5.59341
Abhd4	161.035	157.861	70.7451	78.3557	146.851	49.7427	237.254	121.239	62.4185	124.353	105.389	197.558	95.9921	70.3871	135.602	31.7645	85.1285	92.2584	31.1192	40.0108	43.5943	5.46595	2.58655e-06	43.6047	33.2366
Abhd5	6.43836	4.95356	12.9325	76.4422	80.2108	7.76167	9.40629	14.0152	85.1295	97.0373	7.10001	7.17992	13.4739	80.7858	88.624	10.0492	15.8753	15.3844	42.5068	61.7208	61.9952	18.8464	20.2714	17.4637	35.7102
Abhd6	2.75597	2.99013	3.97612	5.02194	14.6749	6.23161	5.4519	4.72825	6.24149	17.4543	4.49379	4.22102	4.35219	5.63171	16.0646	2.70558	3.8655	3.47251	2.05757	3.50589	9.60087	9.79788	5.96521	14.1322	8.76182
Abhd8	61.5105	70.8461	37.0633	22.2831	21.8988	37.9017	67.1902	45.8607	13.8843	16.5526	49.7061	69.0182	41.462	18.0837	19.2257	26.7725	39.2549	34.2678	14.2769	27.632	11.865	5.35801	7.02805	1.63322	2.58137
Abi1	4.60007	6.16889	5.61361	5.373	5.50488	10.9458	7.93644	5.59336	5.53353	5.18515	7.77294	7.05267	5.60349	5.45327	5.34502	32.0491	28.8883	24.6394	16.1056	18.8102	17.4011	7.96212e-13	2.0532	6.71382	24.8684
Abi2	1.06169	2.57081	1.82602	0.6333	0.66702	1.60372	2.80165	1.80289	0.673556	0.592261	1.33271	2.68623	1.81445	0.653428	0.629641	7.56322	7.79813	7.34229	4.582	6.88289	5.08632	1.65014	2.20673	1.5301	4.54468
Abi3	2.97132	1.55077	1.22454	17.922	140.424	0.534943	1.1124	0.678406	6.82875	119.112	1.75313	1.33159	0.951473	12.3754	129.768	0.179952	0.0549567	0.13819	0.0300956	0.0346526	3.73943	8.31263	7.47084	14.3989	2.10632
Abi3bp	0.0945075	3.35299	3.2511	0.416681	0.168233	0.0218626	0.202314	0.335134	0.528485	0.17909	0.0581851	1.77765	1.79312	0.472583	0.173661	0.195499	1.11765	1.93918	1.39564	2.23421	1.42379	0.396508	1.23702	1.05702	20.1957
Abl1	43.6297	40.6016	29.6801	13.6383	11.9788	41.4926	40.8162	44.4922	14.6637	12.1884	42.5611	40.7089	37.0862	14.151	12.0836	29.3399	26.3276	29.7458	25.8325	26.3748	14.6468	2.78508	3.0883	3.67747	11.0046
Abl2	3.29514	2.1587	1.917	1.31873	1.30074	5.9132	2.97899	2.88089	1.87389	1.10449	4.60417	2.56885	2.39894	1.59631	1.20261	7.12606	3.67895	3.46715	4.78215	2.8616	2.22738	0.385112	1.99794	0.830295	2.82796
Ablim1	6.22143	2.76757	0.538941	0.17343	2.01219	11.9516	5.13421	1.91893	0.0242819	2.24694	9.08652	3.95089	1.22894	0.0988559	2.12956	9.19722	10.7496	7.48341	5.49568	3.1366	3.21455	13.0211	4.86563	14.9344	34.8371
Ablim2	0	0	0	0.333753	2.509	0	0	0	0.428381	1.6429	0	0	0	0.381067	2.07595	0.0420369	0.113647	0.250084	0.0205496	0.119511	2.10293	0.0237987	5.66194e-13	1.48269	4.97191
Ablim3	0.0650298	0.0221673	0.0227606	0.0224854	0.0220475	0	0.0704489	0.0139753	0	0	0.0325149	0.0463081	0.018368	0.0112427	0.0110238	0.084976	0.111957	0.0215625	0.149558	0	0	32.4947	27.6248	20.0959	13.7444
Abo	0	0	0	0	0	0	0	0	0	0	0	0	0	0	0	0	0	0	0	0	0	0	0	0	0
Abp1	NA	NA	NA	NA	NA	NA	NA	NA	NA	NA	NA	NA	NA	NA	NA	NA	NA	NA	NA	NA	NA	0	3.77556e-09	0	0.017727
Abr	19.9439	18.8101	10.5247	4.89179	4.69315	20.1745	21.6878	15.5438	5.5936	4.02662	20.0592	20.249	13.0343	5.2427	4.35989	20.3071	17.7367	16.2031	7.53854	6.12518	4.99741	6.17875	7.80145	2.04311	3.50761
Abra	0	0	0	0	0	0	0	0	0	0	0	0	0	0	0	0.0218757	0.0221704	0.0370072	0.0855579	0.0213712	0.0196282	0.0765526	0	1.01221	0.140515
Abracl	6.60963	5.73111	4.0739	2.53403	5.70016	24.8645	10.8182	4.16903	2.86982	5.11518	15.7371	8.27465	4.12146	2.70193	5.40767	97.6699	56.0577	36.3998	25.1139	17.9389	18.7501	6.10256	11.7766	10.483	17.5112
Abt1	3.43541	3.51345	3.82223	3.7548	3.26983	9.40469	3.67731	4.04772	3.6921	2.72689	6.42005	3.59538	3.93498	3.72345	2.99836	4.2886	2.69793	2.4579	4.91436	4.0272	2.31059	1.57171	1.76158	1.52486	1.55646
Abtb1	10.7383	13.3166	13.1284	21.7954	10.6063	1.72817	13.0098	13.6802	12.4746	11.6254	6.23323	13.1632	13.4043	17.135	11.1159	1.62685	5.99741	7.80924	3.00243	5.92027	11.9331	14.5182	11.6556	9.49316	6.66175
Abtb2	8.4772	29.1341	19.7958	3.29394	1.70631	4.32423	11.7362	11.26	2.24952	1.18874	6.40071	20.4352	15.5279	2.77173	1.44752	3.78107	6.1804	8.36967	5.39627	3.1394	1.98077	1.80899	0.967683	0.474914	0.271532
Acaa1a	31.4429	31.1558	34.4573	105.256	464.216	10.2511	40.5526	33.2478	70.1525	411.649	20.847	35.8542	33.8526	87.7043	437.933	10.1472	19.7269	22.2708	14.8932	19.2836	43.5786	81.815	64.0535	39.2396	32.7397
Acaa1b	10.1483	11.1375	9.00517	43.558	1495.46	2.91066	13.5922	11.033	26.954	1303.74	6.52948	12.3649	10.0191	35.256	1399.6	2.33418	4.98669	5.55252	3.7874	4.50009	13.7247	40.6224	22.514	19.1132	23.5807
Acaa2	41.3914	63.8747	40.9287	132.436	679.038	26.8801	61.8089	42.9946	100.114	618.185	34.1358	62.8418	41.9616	116.275	648.611	19.1184	23.4004	29.7624	22.2418	37.9715	75.719	1189.62	84.9122	718.067	63.9524
Acaca	8.63789	15.2708	16.5897	26.9644	41.6878	7.06363	13.8976	13.5521	24.6605	41.248	7.85076	14.5842	15.0709	25.8124	41.4679	7.95367	12.6038	6.37165	12.0391	8.24173	22.0262	121.758	38.34	68.8765	77.8288
Acacb	0.440998	0.536923	0.132311	8.6705	136.527	0.0388656	0.966849	0.311421	5.71254	127.154	0.239932	0.751886	0.221866	7.19152	131.84	0.251078	1.28065	1.18721	0.160982	0.675547	3.02839	114.248	18.0295	93.8998	13.3145
Acad10	3.93136	4.09873	2.81899	6.79728	13.2737	1.1538	9.06907	6.31652	5.20414	12.3725	2.54258	6.5839	4.56776	6.00071	12.8231	0.992498	2.60818	2.86867	1.26628	1.82228	5.75756	12.537	3.4248	8.37963	4.83399
Acad11	0.359516	2.60206	3.42676	7.94052	21.6595	1.10043	4.50808	3.36986	6.93736	25.414	0.729973	3.55507	3.39831	7.43894	23.5368	2.80773	5.0869	4.90487	3.60373	7.24205	23.9479	42.9499	14.9574	56.6161	49.4036
Acad12	3.26397	2.96949	1.95555	5.1102	12.2687	1.11181	6.17154	2.86626	3.13552	10.6188	2.18789	4.57052	2.41091	4.12286	11.4437	0.855614	2.49005	2.32388	0.708675	1.41103	3.68078	16.4305	4.20351	9.54037	7.59474
Acad8	3.79452	4.54981	5.53034	6.21004	8.61791	5.35785	8.18585	5.5259	6.87306	9.1824	4.57618	6.36783	5.52812	6.54155	8.90015	5.7832	6.56288	6.05229	4.85221	8.59374	11.4136	16.6088	7.92404	12.3941	10.3452
Acad9	1.78163	2.07384	3.88945	5.11917	4.21072	3.52513	2.63478	2.66275	5.70746	3.08974	2.65338	2.35431	3.2761	5.41331	3.65023	8.26629	6.74423	5.53294	8.42862	9.43061	16.677	10.1508	8.01441	5.5887	9.20202
Acadl	38.5367	14.8879	10.4178	104.237	246.326	41.2431	33.7272	15.7826	105.067	212.461	39.8899	24.3075	13.1002	104.652	229.393	55.4039	67.737	46.285	13.9492	54.3839	135.671	547.559	70.2686	686.811	101.202
Acadm	3.79038	4.92936	11.8425	172.771	237.711	1.73211	7.57865	4.64646	83.1061	156.182	2.76125	6.25401	8.24448	127.939	196.946	13.0241	24.1311	26.7344	13.8467	72.4269	142.424	402.96	61.6941	454.668	143.951
Acads	94.6678	53.5863	32.2232	208.976	614.294	45.6368	59.0508	37.7202	130.081	520.965	70.1523	56.3186	34.9717	169.529	567.63	15.9161	18.66	15.2623	6.94104	19.3863	79.0406	264.915	68.2638	149.563	45.9923
Acadsb	1.41041	3.73339	4.12373	4.04518	7.22955	0.972472	4.14932	2.78165	2.93847	6.34278	1.19144	3.94136	3.45269	3.49182	6.78616	6.39616	14.2831	19.6877	16.2286	23.8508	50.2505	25.6561	22.7417	33.0513	72.852
Acadvl	57.1893	59.7881	75.7462	299.685	678.523	47.7714	62.0882	62.0638	221.763	541.564	52.4804	60.9382	68.905	260.724	610.043	14.5162	25.6107	24.8841	23.4823	52.7818	160.645	570.936	61.4881	456.495	56.0447
Acan	0	21.768	6.06488	1.24877	0	0	0.00658604	0	0	0	0	10.8873	3.03244	0.624385	0	0.00476644	0.00966132	0	0.00466049	0	0	0.0166905	0.0982107	0.0196043	0
Acap1	0.0381677	1.09297	0	0	0	0.0353195	0.16539	0.0246093	0	0	0.0367436	0.62918	0.0123047	0	0	0.0448859	0.0454906	0.0253112	0	0.0146169	0	0.837951	2.00309	0.292307	0.749623
Acap2	2.03929	4.28433	4.48612	2.08686	1.56103	1.54167	4.44831	4.22985	1.89428	1.45235	1.79048	4.36632	4.35799	1.99057	1.50669	12.7066	19.6998	21.9886	24.6283	18.0313	18.8292	4.91522	7.97502	2.78083	12.5778
Acap3	36.5954	22.2093	21.8258	17.8512	13.5851	30.7112	16.2566	16.0897	13.24	10.277	33.6533	19.2329	18.9578	15.5456	11.9311	10.4294	9.6029	9.5867	10.587	10.9751	6.06737	8.80207	10.1991	2.29495	4.65795
Acat1	7.81953	10.3261	8.93149	39.6773	43.4817	10.9936	8.70875	6.05013	26.6103	36.7477	9.40657	9.51742	7.49081	33.1438	40.1147	23.1941	34.178	33.6335	26.3961	46.8682	91.967	111.078	38.6995	114.861	59.7038
Acat2	50.8185	36.1633	40.0007	92.9546	160.99	30.3146	58.1842	36.4994	97.4534	164.464	40.5665	47.1737	38.2501	95.204	162.727	65.6533	128.364	27.796	26.7653	69.3136	97.8752	44.1592	17.2166	55.3297	19.6705
Acat3	15.9904	8.66304	9.48315	30.8976	47.1627	6.6336	14.0099	9.08698	25.9923	46.5239	11.312	11.3365	9.28506	28.4449	46.8433	12.1733	27.4669	4.99315	5.58994	14.5245	21.35	16.7172	5.35363	7.10802	4.17663
Acbd3	2.76785	6.36913	7.79723	3.50636	2.78836	3.7927	4.48324	4.92486	2.67901	2.18998	3.28028	5.42619	6.36104	3.09268	2.48917	22.4306	24.932	21.9821	20.6059	18.346	18.6751	8.03541	8.84749	8.28162	12.183
Acbd4	16.8131	10.0225	6.19397	24.91	143.029	11.2175	15.5471	12.7571	20.3336	121.562	14.0153	12.7848	9.47554	22.6218	132.296	5.06146	8.17422	9.00909	4.57511	7.91512	41.5346	32.753	33.9958	20.7896	33.3651
Acbd5	0.564202	2.2021	1.7238	2.49892	7.43322	0.99675	2.38327	1.75324	2.66895	5.37501	0.780476	2.29269	1.73852	2.58393	6.40412	8.06982	11.0878	9.49676	5.92185	7.33032	13.5018	3.33191	1.09011	7.17588	22.2948
Acbd6	59.1552	48.3281	58.6447	73.5638	59.1534	73.7658	65.5039	61.966	83.082	59.3906	66.4605	56.916	60.3053	78.3229	59.272	32.9198	34.77	32.3209	27.1885	37.9848	27.0537	4.48845	9.43061	16.7795	17.9184
Acbd7	0	0	0	0	0.267094	0	0.142228	0	0	0	0	0.071114	0	0	0.133547	0	0.208639	0.174132	0	0	0	0	0	0	0.132234
Accs	1.44667	1.22553	0.341032	1.27549	1.91139	0.386413	2.10049	0.68581	1.11201	2.46402	0.916542	1.66301	0.513421	1.19375	2.1877	0.886711	2.50347	2.87455	0.400126	1.06234	1.37898	2.72609	2.93432	3.28185	3.56332
Accsl	0	0	0	0.133889	0.218803	0	0	0	0.0687394	0.351496	0	0	0	0.101314	0.28515	0.0674579	0.0854584	0.0427945	0	0.0329511	0.0302637	0.182217	0.119134	0.43352	0.324978
Acd	141.556	93.14	72.5286	67.9953	40.9225	62.2674	103.595	72.2405	50.0597	36.8939	101.912	98.3675	72.3846	59.0275	38.9082	37.5055	50.4956	48.924	26.883	36.8132	26.122	13.1837	12.9293	10.7342	9.95075
Ace	0.207961	0.0378192	0.330104	0.0925111	0.120946	0	0.310848	1.22167	0.118692	0.291376	0.103981	0.174334	0.775887	0.105602	0.206161	0	0.0118096	0	0.0569565	0.10241	0.0313661	8.59992	53.6813	4.15208	35.8239
[truncated: 21,296 more rows]

## Sheet: BA stage specific genes
Gene	BA d0-3	BA d0	BA 6h	BA d2	BA d7
Scarna17	979.691	0	443.162	0	200.559
Ctgf	339.182	36.5061	4.8151	4.17176	0.449512
Ngf	147.934	5.66435	15.0278	0.200733	0.739066
Tagln	127.934	5.09014	3.3984	1.17054	2.61617
Klhdc8a	119.649	13.0608	10.1832	0.909505	1.60518
AF357399	114.076	33.3862	0	0	17.9856
Gm5424	81.4912	17.679	9.53351	0.502754	0.613132
Sprr1a	81.4625	0.763345	0.0478241	0.272406	5.37279
Plaur	81.2416	3.82332	2.87809	0.233079	0.965681
Arhgap22	79.2746	4.1647	2.31026	0.669946	3.08222
Foxm1	75.8514	23.999	21.3754	2.55226	4.64431
Actg2	74.2353	11.0116	10.4857	0.0811805	0.530419
Itpr3	69.6905	32.3347	19.0875	3.70124	2.19741
Rasa4	69.2047	33.6214	9.93965	2.59516	4.21209
Anxa3	68.5923	12.1812	3.8478	0.0822367	0.835715
Loxl3	67.8143	62.5564	59.6848	2.7102	4.55218
Tm4sf1	66.339	30.2162	33.965	1.62774	3.995
Uhrf1	63.9539	27.2252	15.2573	2.04288	4.00956
Hmga2	56.8822	9.89139	12.0299	0.468139	0.457185
Col16a1	56.7391	74.5787	69.8012	3.6258	3.83698
Ncs1	56.6782	25.1603	24.1754	4.90876	2.49341
Gprc5a	55.8419	2.58252	16.5022	0.630258	0.460874
Epha2	55.5878	6.75202	4.43054	0.493496	0.658614
Fmnl3	55.0834	30.3175	20.0686	3.14521	2.6949
Pold1	53.5065	20.428	17.1636	4.8464	4.48101
Rin1	52.6236	2.63376	2.35733	0.385357	0.891101
Cryab	51.7293	85.1825	32.2973	0.424899	3.96375
Npcd	50.6728	19.5761	18.0187	3.39629	3.32816
Plk2	50.2229	27.3738	10.8176	2.66594	0.723792
Klf2	49.0994	52.4303	4.72612	1.53933	11.0132
Cdt1	48.9734	16.989	13.9352	3.86233	4.43734
Ajuba	48.4931	10.8658	5.286	2.71423	2.05894
Etv4	47.1268	16.5916	5.70273	0.0537335	0.824533
Gtse1	47.0757	16.79	17.1344	1.65636	2.15808
Cald1	46.4892	64.3145	31.0949	4.23654	2.95779
Ccnf	46.1035	14.6673	13.5786	3.40304	3.42504
Sema7a	45.9269	0.346714	0.626672	0.986798	0.296718
Dusp14	45.6442	8.27601	12.799	2.08426	1.82299
Ass1	44.1236	9.38082	5.39903	0.26499	0.285739
Metrnl	43.3216	9.77229	9.60304	3.54435	4.60271
Dnph1	42.8472	8.92407	5.9536	3.74864	2.37059
Kif18b	42.4051	15.3418	17.9304	0.998858	3.22792
Fhl2	42.2662	8.43529	2.42957	2.94693	1.70056
Cdca8	41.9206	20.6695	20.2584	2.44376	4.23108
Mcm6	41.3706	17.7246	11.3324	4.23486	3.9474
Ttc7	40.4615	14.2959	16.4705	4.46931	3.493
Kif22	38.2657	19.83	20.8153	1.28031	4.40982
Lrrk1	37.8486	18.626	9.75511	2.71182	3.60716
Chaf1b	37.8138	15.7287	7.78507	1.14986	2.80541
Fkbp11	37.3558	24.7529	11.6073	2.57672	4.54467
Thbs1	36.6413	5.03786	3.04596	0.87788	3.2188
Egr1	35.7801	10.513	3.72374	20.7627	2.37495
Rpl26	35.1962	3.25755	2.84551	7.38495	5.60515
Anxa8	35.016	4.32787	2.31268	34.1421	1.03606
Elk3	34.9134	30.7441	10.6731	2.26791	3.83849
Lpcat4	34.5146	37.2248	22.5548	3.94327	1.60303
Sema3f	34.127	19.7029	9.2141	3.0157	3.56572
Chtf18	33.8974	12.3493	10.3809	2.54189	2.67338
Pak1	33.7456	10.109	4.1796	1.271	1.48433
Fam110a	33.1726	12.0651	9.24481	1.30271	3.72257
Chst1	32.5742	6.69364	6.89914	2.13488	1.95094
Pear1	32.4837	13.9665	10.1685	3.65174	2.74247
Suv39h1	31.3634	14.5342	13.6421	4.74578	4.13396
Mybl2	31.1747	8.50499	6.01453	0.823666	0.951755
Chaf1a	31.1655	13.3612	13.4641	3.41323	2.6881
Il1rl1	29.7727	0.20223	1.52096	0.342972	0.10902
Unc5b	29.3357	49.2208	36.9377	2.73714	3.37644
Gadd45b	29.0033	16.649	13.0921	1.32318	0.750788
Prss23	28.9846	15.672	10.8656	0.576533	0.747702
Hmga2-ps1	28.9027	9.16202	17.7229	0.746765	2.2226
Dnmt1	28.7559	20.4557	25.0384	4.41739	3.74833
Hbegf	28.7246	1.45197	0.801237	0.179078	0.107851
Hpcal1	27.9369	11.9192	9.16443	1.42976	4.78992
Pdia5	27.6817	13.9286	10.7363	2.77523	4.39037
Cd276	27.5334	52.2047	22.6832	3.16819	3.77533
Tmpo	27.4664	12.3072	8.48015	2.92533	4.46921
Glipr1	27.381	23.1672	9.83704	3.05503	3.11689
Tacc2	27.208	27.9951	17.9938	3.52873	4.38296
Dusp5	27.0619	0.778421	0.604598	0.561932	3.06319
Masp1	27.0035	19.0406	28.8224	0.629659	1.01823
Tacc3	26.6513	12.9687	16.0108	1.89428	3.09161
BC030867	26.56	6.59441	8.07561	1.39799	2.48963
Rab31	26.4206	22.6694	13.5482	3.06705	3.67198
Def6	26.3874	17.7587	7.29625	2.18176	2.47858
Pvrl1	26.3649	8.14992	8.26455	1.65667	1.36851
Rrm1	26.1913	10.2484	8.01258	3.00508	3.92929
Plekho2	25.9824	21.017	17.964	4.12923	3.48623
Fez1	25.9469	13.8806	2.56541	0.590742	1.46312
Il4ra	25.7158	8.49925	6.36196	1.6666	2.68343
Lmnb1	25.5778	16.6146	15.3336	2.29735	2.99387
Kifc1	25.5704	12.0442	12.5066	1.66765	2.92806
Cgref1	25.5018	2.27079	10.7841	0.575479	2.20236
Rin3	25.4712	26.7122	12.2804	4.3606	3.47839
Ccdc24	25.4091	6.73728	5.16768	1.65916	1.38229
Calhm2	25.3804	25.7801	13.4353	1.52757	2.39707
Podnl1	25.2928	6.58389	2.50714	0.0906315	0.50271
Ccna2	25.2488	9.56705	9.07553	1.20029	2.70906
Bok	24.747	1.42949	0.362588	0.997437	2.62204
Clcf1	24.667	13.3634	20.4826	0.802747	1.08244
Apbb1	24.4206	23.1552	16.0591	3.45151	2.65862
Cdk1	24.2574	15.1647	13.0048	1.94762	3.22749
Myof	24.0397	28.8944	49.0514	0.979392	2.71576
Iqgap3	24.0242	12.9858	8.82699	0.727849	3.18952
Gata2	23.6641	30.7244	34.4513	3.39652	0.847758
Ltbp1	23.587	8.45661	8.63664	4.27756	1.64872
Troap	23.4973	8.41739	13.6882	1.0413	2.41066
Itprip	23.3793	7.8006	8.96293	0.883671	0.924785
B9d1	23.3522	32.191	23.2279	4.27111	3.03879
Ddah1	23.3008	7.29542	15.6819	2.75492	1.95992
Espl1	23.2744	7.97229	9.0242	0.653115	1.77378
Arhgef19	23.24	43.7026	30.4362	3.41113	3.11079
Kcnn4	23.0903	4.26375	2.27907	0.117127	0.386381
Ccnb2	23.0694	14.3137	9.95156	2.04354	4.43878
Fam20a	22.7638	2.13589	0.421509	0.0683181	0.600836
Tubb3	22.429	3.24641	3.09372	0.11193	0.774516
BC022687	22.3457	12.808	5.76745	1.27212	1.50188
Trpv4	22.1568	76.5373	166.579	3.28526	1.48606
Mapk12	21.8688	6.52407	1.24972	1.13634	2.93826
Fen1	21.7724	8.77814	10.7928	2.49903	3.18612
Myo1e	21.5447	14.9686	15.4269	2.79921	1.91009
Crip2	21.309	10.7587	3.43676	5.66951	3.76554
Ptgs2	21.2044	2.42554	0.70903	0.066032	0.0739444
Specc1	21.1693	5.67145	2.11024	1.12343	1.1436
Cchcr1	21.112	12.8917	5.44728	1.78992	2.50958
Rras2	21.1044	3.24619	5.07088	4.24232	6.26192
Nptxr	21.0125	6.7824	8.84272	1.04578	1.79503
Prickle3	20.9961	13.3529	9.48607	1.64925	1.83135
Runx3	20.9798	6.24179	4.22461	1.33329	0.976786
Maff	20.7872	2.01279	6.85236	2.22479	14.6646
Gjb4	20.7512	22.4571	11.2321	0.282356	0.846935
Psrc1	20.7096	24.1333	12.9429	2.9211	1.51953
5730416F02Rik	20.6786	9.60241	4.32495	0.924896	0.93696
Loxl4	20.5809	6.38755	1.48159	0.330963	0.16462
Eva1c	20.1335	11.2611	20.6487	0.520194	1.82802
Rab6b	19.9459	6.24815	9.47156	2.0414	3.71443
Vdr	19.9291	32.5714	129.285	4.47363	1.45071
Osr2	19.7976	13.3316	22.0931	3.22614	2.37534
Lfng	19.1722	15.4577	1.3453	0.941044	10.8285
Gins2	19.1317	9.31784	5.59861	2.35934	3.48598
Kctd11	19.0516	10.097	13.2437	2.90028	2.11685
Rassf1	18.9862	4.9089	4.83018	2.36114	4.45859
Tle6	18.8995	24.819	4.98161	3.8836	2.89696
Ripk3	18.7122	12.5923	10.0995	1.03917	2.08392
Rgs12	18.7045	14.2823	8.24137	1.75486	1.54461
Ccdc109b	18.6661	7.64035	3.27794	0.429934	0.492995
C77080	18.525	7.05562	2.09281	3.59911	8.31554
Fam46b	18.4542	3.66162	3.25073	0.136558	1.02369
Cdr2l	18.4423	20.0123	17.3226	3.52846	1.72614
Igf1r	18.4059	9.86358	20.9922	3.44884	1.07305
Eml1	18.3474	14.8541	8.23099	1.36971	2.12108
Syk	18.2877	5.60595	0.989953	0.105679	0.319111
Kif20a	18.2366	11.9884	14.6843	1.65131	3.51624
Ccl2	18.057	0.382334	0.692988	0	0.862024
Pld2	18.0407	8.58405	3.71842	2.23858	7.8199
Fhl1	17.9703	8.32495	3.05494	0.649388	6.07444
Cdca5	17.566	8.6963	8.00488	0.877134	1.90169
Tmem171	17.5598	0.0495169	0	0	0.0731703
Emp2	17.5297	11.797	4.06231	0.40016	0.833117
Inhbb	17.3432	0.331946	0.230324	0.459268	0.0280955
Artn	17.2593	2.41743	0.315886	0.082848	0.18902
Fblim1	17.2077	18.5756	3.7518	0.963705	1.24042
Rfc3	17.1763	16.2019	10.0795	2.07333	3.83646
Ier5	17.1426	7.438	8.08487	3.93369	1.90003
Tns3	17.1165	25.2812	4.95135	1.60404	1.23245
Thbd	17.075	11.5107	37.0018	4.22541	4.63498
Wdr62	17.0543	6.97252	6.1592	1.05516	1.91964
Dab2	17.0334	37.1082	11.9351	3.41731	2.77895
Mical1	17.0302	36.7024	12.2237	1.99656	3.84737
Spc24	17.0145	9.29864	5.62232	0.783057	2.05792
6030419C18Rik	16.81	23.2949	18.3665	4.85926	2.29907
Arrdc1	16.7678	9.36368	6.48534	0.419467	1.86938
Gm14005	16.7457	2.74576	0.982173	0.469944	0.344646
Plekho1	16.6459	24.4629	8.11929	2.78755	2.59796
Wdr54	16.6217	7.33765	8.28469	1.84417	2.40983
Kifc5b	16.3675	7.69573	8.42639	1.09661	1.58656
C1qtnf1	16.36	22.5502	8.3145	1.03302	4.78538
Mapk11	16.3419	5.85612	2.48026	2.92505	2.43353
Fam83d	16.1991	8.05795	10.3385	1.2392	2.89965
Gm2115	16.041	7.1277	12.8624	0.772074	1.29727
F2r	16.0325	10.4608	9.75018	2.6023	1.92059
Sorcs2	16.0039	7.66365	6.08507	2.4794	1.07826
Mthfd1l	15.9059	9.28386	12.8925	1.60909	3.39772
Enoph1	15.6041	6.70091	4.96051	3.15918	2.0763
Ccdc184	15.4014	6.31339	1.06997	0	0.181484
Itgb7	15.3968	0.263736	0.893286	0.0421834	0.17404
Cdc42ep3	15.3223	15.6381	2.21907	1.97672	3.08249
Atp8b2	15.1578	21.5749	21.3442	3.15831	2.33693
Mtmr11	15.1193	18.0689	6.40484	0.61617	1.60186
Tonsl	15.0594	5.72212	5.41383	1.66925	1.91273
Adm	15.0484	0.631075	0.312984	0.624919	2.42523
Speg	15.0373	20.4659	10.2046	1.6355	1.79308
Dusp6	14.9503	7.3681	5.09122	1.24626	3.31002
Itpripl2	14.9025	8.47008	13.8614	2.17889	1.29618
Arhgap10	14.8032	8.11136	4.42779	2.49531	2.68332
Socs1	14.784	17.6022	9.318	1.45696	1.2829
Tspan11	14.771	2.00452	5.7575	3.61889	2.0338
Spcs3	14.7277	5.63285	4.90259	2.77568	2.06984
Prl2c2	14.5715	1.2499	0.482226	1.0171	0.450195
Pdgfa	14.526	5.07346	5.34278	3.70457	1.53898
Tes	14.4392	5.88004	3.96496	0.122528	0.155794
Dusp3	14.4226	2.60564	1.6829	1.30135	29.0223
Wwc2	14.4005	8.65243	4.66373	2.17642	2.76562
Arhgdig	14.3719	0.814899	0.199231	1.79031	0.672304
Tead4	14.348	4.34943	11.3362	7.80157	0.31581
Itga3	14.3333	2.20823	1.2314	0.403874	1.94026
Antxr1	14.315	42.1573	19.6791	3.18402	3.38038
Rgs20	14.2934	4.81017	5.30179	0.519378	0.298809
Lrrc8c	14.1587	10.9579	9.16599	0.947894	0.845873
Spire2	14.1052	16.6284	1.206	0.557329	0.683701
Gxylt2	14.0836	12.0284	23.0241	1.70113	1.19055
Slc20a1	13.933	5.45618	13.0234	1.84465	2.48312
Sall2	13.91	27.8699	18.8529	4.86826	3.06331
Hist1h2aa	13.8836	7.55171	4.70892	1.87774	1.32468
Adamtsl5	13.8469	13.1031	3.90362	0.5422	1.82815
Lhfp	13.8264	10.6093	4.77757	1.44922	0.899867
Ncam1	13.7677	8.22682	16.1479	0.806523	0.733302
Steap1	13.7557	0.71605	2.82023	0.771862	1.08869
Rab32	13.7257	30.467	8.71463	1.8947	3.63192
Lurap1l	13.54	6.32887	7.4899	1.64418	2.07475
Plau	13.4287	1.94829	0.927407	0.0908785	0.378551
Tspan15	13.346	1.52291	1.09055	11.9143	34.446
Polm	13.3289	5.53286	4.03912	0.905686	1.54867
Spon2	13.1975	16.2986	3.10497	1.49723	1.47226
Dpysl3	13.122	53.7437	28.8684	0.798034	0.645454
Scx	13.0462	2.1555	0.81626	0.599524	0.176543
Ramp3	13.004	1.33763	352.622	0.706401	0.336402
Rbm38	12.9655	0.561531	3.76706	12.536	9.10092
3300005D01Rik	12.9543	0.945015	0.369432	0.121625	0.353715
Ly6e	12.9208	16.0894	11.9619	1.20215	3.04962
Nuak2	12.9142	1.72131	1.15828	0.238985	0.311505
Prl2c3	12.7606	0.00178337	0.000770535	0.00249494	0.194051
Ccnb1	12.6848	4.36306	6.64292	1.07036	1.7838
4930427A07Rik	12.5449	5.24929	8.28742	0.539769	1.2964
Crct1	12.5443	0	0	0	0
2010111I01Rik	12.5252	9.99316	2.97771	1.77754	1.64072
Gdf11	12.424	21.9981	13.5773	3.11436	1.48495
Rassf7	12.4097	1.54464	0.483168	0.5674	1.49967
Pdzd4	12.358	23.2056	12.9243	4.5426	2.56011
Fam131b	12.3032	6.2973	3.09246	0.166109	0.258346
Chst7	12.2698	10.1455	3.91784	0.352261	0.877447
Ccdc92	12.2614	5.21163	4.92148	1.18402	0.499518
Bcat1	12.0303	4.5973	7.52033	0.262673	0.184971
Nrg1	12.024	3.10645	2.27142	0.760219	0.676417
Rps6ka2	11.9876	8.26374	17.1411	4.35212	1.18369
Dlx2	11.8993	24.1226	12.4291	0.683778	0.256859
Renbp	11.8187	13.1361	3.29112	1.00962	2.64889
Klf5	11.8125	8.45279	11.2861	3.86093	0.183008
Tspan5	11.8003	6.20423	3.99504	2.51281	1.21944
Ydjc	11.6757	4.40885	2.03649	4.42865	1.76406
Tmem107	11.6627	13.4927	7.57808	1.74986	2.07658
Foxs1	11.6557	1.78415	0.993956	0.451382	0.451803
Upp1	11.6512	1.07453	0.213244	0.399283	1.86936
Tgfb3	11.6198	18.0487	40.1957	3.31644	1.91084
Btbd19	11.6085	8.70997	2.68819	1.77374	1.95009
Efna1	11.5981	12.2667	12.3581	2.08434	1.3313
Adamts14	11.5441	6.10006	1.59984	0.629307	1.03096
Akr1b3	11.5228	2.25475	0.670714	3.39085	6.51926
Klf6	11.5038	4.64865	1.88739	1.05073	3.75108
Eno3	11.4906	15.643	6.1833	1.79102	3.24749
Orai2	11.3068	11.5146	8.48664	0.973538	0.744818
Vgll3	11.2195	3.20321	1.71599	0.540597	0.439306
Tvp23a	11.1835	14.7182	8.8433	1.57995	1.8013
Tpx2	11.132	6.42146	6.97711	0.875283	1.8018
Fam189b	11.1306	9.12789	3.04924	1.2009	1.07073
Mapre2	11.004	21.3024	12.3824	2.57979	3.75768
Fam101b	11.0015	48.7097	5.6372	1.44363	2.06887
Shc2	10.9305	5.65242	2.22982	1.25488	0.925236
Rhoj	10.9293	41.9535	17.4231	4.50844	3.76652
Lrig1	10.914	1.38308	3.36734	37.9266	13.7934
Trnp1	10.9003	32.1513	14.2904	1.06745	3.69287
Dlk2	10.8551	5.52137	0.506715	0	0.0333976
Tpbg	10.8432	11.5125	8.59136	1.43076	1.34322
Slc9a3r1	10.8089	3.92367	3.78938	40.8397	11.278
Crim1	10.8006	5.72983	5.01788	0.943867	0.700127
Bub1b	10.7869	7.09227	7.0061	0.867712	1.32475
Cars2	10.7803	4.67823	3.44088	8.85528	27.7501
Ncaph	10.7559	12.5224	9.3292	1.18769	2.13079
Fam3c	10.6909	39.7392	20.245	4.52143	2.96882
Klf4	10.6439	19.6984	10.7331	2.3955	1.99327
Dpysl2	10.6152	15.0373	4.71082	0.620644	1.8478
Tyro3	10.4506	15.795	4.86314	1.98587	1.76077
Adamts5	10.3445	3.39933	0.897622	0.63625	1.28901
Fam114a1	10.3265	20.9089	12.8293	2.97601	2.83812
Dbndd2	10.0975	2.26207	0.669351	0.674722	5.42793
Krt80	10.0879	0	0.017853	0.022121	0.410925
Whsc1	10.0542	3.22982	2.1217	2.39409	2.13969
Ggta1	9.98414	4.97022	1.32793	0.193946	0.427544
Mad2l1	9.98205	4.64732	5.1437	1.33764	0.998439
Man2a1	9.87941	8.45633	22.4142	3.66961	3.63376
Syne3	9.85336	5.79319	7.8996	1.12697	1.13876
Nsg1	9.83825	16.7917	17.9895	2.18562	2.28607
Tmem119	9.8095	6.3166	99.5718	0.559579	1.86096
Fah	9.79212	5.7044	1.76008	2.93545	75.3923
Slc25a24	9.76725	5.55642	1.92298	0.718463	1.02706
Id2	9.68167	21.5292	12.6159	0.56881	2.12838
Pla2g4a	9.61355	9.93015	2.93645	0.383584	0.275207
Lims2	9.60461	2.83045	1.59792	2.00881	18.5538
Arhgef39	9.56863	3.74415	3.30282	0.523837	1.1768
Rbpj	9.55712	9.46524	4.73976	1.33117	1.63645
Adcy7	9.53423	2.2923	0.510903	0.0866013	0.476135
Cdh26	9.48151	2.70693	0.686519	0.43358	1.15277
Fam198b	9.39077	10.4738	7.04639	0.712486	1.04676
Fgd3	9.37632	1.86072	0.276143	0.0119516	0.0304343
Gm11974	9.34899	2.77813	2.76198	5.57081	0.415575
Tnfrsf1b	9.34014	3.33349	12.8321	1.73879	1.11825
Brsk1	9.31896	13.2183	11.8054	1.20331	0.657347
Ctsh	9.28069	5.46085	3.43077	0.834331	0.90111
Procr	9.20678	8.35281	5.88303	0.461731	0.637881
Melk	9.13599	7.09295	4.7353	0.420249	1.23131
Pvrl3	9.10456	4.20481	2.94493	1.1	0.543926
Ablim1	9.08652	3.95089	1.22894	0.0988559	2.12956
Wdr90	9.0399	3.81057	3.1399	0.959966	1.16564
Atp1b1	9.01653	19.6654	23.4794	2.68856	4.11856
Lrrc75a	8.97297	8.43834	2.15603	0.959553	1.66766
P4ha3	8.96401	10.1312	7.87986	0.144233	0.637178
Tram2	8.94443	13.7226	12.8146	1.91953	1.07202
Epb4.1l3	8.93272	4.75023	2.77881	0.647949	0.41049
Fkbp5	8.90376	1.78414	45.6341	70.016	3.00528
Kif2c	8.89584	6.00866	6.21084	0.710647	1.48994
Medag	8.86011	0.555082	3.19484	0.433307	1.72819
Arl4c	8.85751	10.962	9.24808	1.05096	0.369789
Peak1	8.85404	8.39565	20.8515	2.77178	2.14993
4933412E12Rik	8.8496	15.9431	5.61826	1.05414	1.26394
Gm12238	8.69155	0	6.05595	0	10.9628
E2f8	8.66917	3.77754	2.22468	0.362438	0.509551
Iglon5	8.66228	20.8596	10.8924	1.55403	2.36797
Nav2	8.60745	7.95779	3.66209	0.221623	0.271341
Pkd2	8.58948	17.3682	14.8041	2.88697	2.40876
Efnb2	8.57583	4.18444	18.49	0.904377	0.273762
Bmp4	8.55571	8.84211	1.57753	0.539228	0.871151
Jup	8.55569	2.34071	0.754387	0.14953	0.784974
Ackr3	8.55039	12.2645	50.5823	2.74845	1.71977
Fanca	8.38293	2.90363	2.01432	0.444221	0.771554
Rnf157	8.37063	11.7639	5.31443	0.870118	1.92577
Dusp4	8.31453	2.92112	2.09206	27.0643	24.5544
Cystm1	8.21852	0.65552	0.403383	2.4665	12.138
Msln	8.20374	0	0.0146675	0.018174	0.0231397
Tmem121	8.19632	8.08727	6.80658	1.1559	1.17352
Slc27a1	8.1414	4.19957	1.233	16.09	41.8834
Layn	8.13627	12.2125	12.7812	1.61668	1.9396
Prc1	8.04339	4.29737	5.67453	0.491669	1.91828
Nek2	8.03241	2.62521	4.04085	0.36891	0.860074
Dlx5	7.99098	53.9363	35.7751	1.58101	1.0284
Ift122	7.93189	17.6053	10.6673	3.83644	1.73815
Sapcd2	7.88748	2.46289	2.37325	0.10631	0.672413
Pcdh7	7.83089	6.13021	3.92124	0.562909	1.84489
Ephb6	7.82526	19.1319	12.1622	2.98327	1.80823
Mcm10	7.79999	2.30956	2.75786	0.551943	0.426802
1110046J04Rik	7.76609	5.57303	1.19622	0.060601	0.748643
Spag5	7.75001	3.48684	4.17251	0.69003	0.756593
Fyn	7.74853	9.0061	10.5184	1.71691	0.722622
Fam212a	7.71957	21.1672	6.76703	3.93488	2.81899
Tnnt2	7.69785	0.179198	0.0852645	0	0
Rad51	7.69606	3.04156	2.09411	0.48111	0.627459
Ccbe1	7.66513	1.45554	0.979057	0.0439012	0.0125666
Pcdh19	7.57245	1.20501	2.01075	0.478141	0.363692
Fstl3	7.52973	1.25765	1.41534	0.458493	0.574284
Meg3	7.49512	20.6679	15.5947	1.28329	0.981744
Mpp2	7.44653	8.88235	4.33774	0.206527	4.10461
Foxf2	7.44648	8.95158	15.7792	1.35539	0.363119
Adamts7	7.42027	12.5265	5.88077	0.833641	1.52887
Recql4	7.41545	2.40247	2.51622	0.713111	0.626853
Ston1	7.41041	9.07776	9.12665	1.49152	0.819604
Mfhas1	7.35761	3.01972	4.01574	0.647408	0.430702
Prim1	7.3431	5.61296	3.77886	1.15956	0.995398
Tmem45a	7.30497	23.8113	10.4181	2.0097	2.85107
Crls1	7.27644	3.84995	4.37963	22.6956	49.5331
E2f7	7.27572	2.58194	1.75069	0.196855	0.395883
Runx2	7.24252	14.0379	6.71699	1.89442	1.23232
Cryl1	7.22037	10.7515	3.48882	0.860469	1.73703
2810408I11Rik	7.1919	2.4918	3.43877	0.586478	1.08072
Crabp2	7.18762	1.64597	0.942272	0.199574	0.227025
Cdc6	7.18076	3.34692	3.47081	0.49574	0.45307
Cd109	7.11475	6.22267	7.11762	0.0441226	0.558394
Dennd2a	7.11227	15.2233	7.06555	1.40018	1.63285
Lynx1	7.07504	12.7401	7.98728	0.449093	2.10476
Alcam	7.02886	4.47165	6.21447	1.45716	0.800293
Trim16	7.01365	2.02597	0.70153	0.163576	0.380332
Npnt	6.99094	30.8896	26.3633	1.54636	2.07322
Ap1g2	6.9728	3.06833	1.18945	6.78458	21.5666
Fndc4	6.92785	10.1029	4.12413	0.587872	1.1849
Ccdc136	6.92457	11.653	10.6178	1.15802	0.53916
Hmgb2	6.90822	6.9515	6.90124	0.565673	0.677566
Atp10a	6.89201	1.67636	2.75986	0.156945	0.338853
Nuak1	6.87909	62.2756	12.7082	1.37071	1.81351
Apbb2	6.79073	13.71	14.4722	1.91761	0.914702
Ampd3	6.78887	0.854721	0.588143	1.8142	2.04933
Crabp1	6.75993	11.0383	9.56198	0.377736	0.196151
Pianp	6.74158	22.1786	9.17876	1.29839	1.37704
Lrp8	6.67626	1.48844	2.13426	0.154673	0.279282
Lpin3	6.6602	1.09508	1.29803	0.659987	1.22731
Ankrd1	6.61179	0	0	0	0
Anln	6.6094	4.16638	3.9711	0.414554	1.45017
Cnp	6.60735	14.7979	3.00559	2.28044	4.9313
Pbk	6.54903	3.91958	5.14335	0.539203	1.31506
Radil	6.5488	3.30736	1.658	8.85233	25.6633
Aif1l	6.54218	12.7387	4.79924	0.209502	0.439071
Cdkn3	6.53062	3.04738	2.6527	0.500059	0.743895
Pole	6.52628	3.79419	2.54638	0.857803	0.906883
Fhdc1	6.52311	3.74939	4.99163	0.393994	0.449047
Grem1	6.49507	15.5621	12.8921	0.343522	0.397038
A430105I19Rik	6.49219	2.01717	1.41612	0.660051	1.46029
Vash2	6.44679	8.49411	5.07109	0.590927	0.536834
H2-K1	6.43884	4.79448	4.33376	2.06512	26.2714
Abtb2	6.40071	20.4352	15.5279	2.77173	1.44752
Cand2	6.38727	15.5725	6.1575	1.35904	1.5533
Fam111a	6.36688	2.96941	2.69361	0.449667	1.09986
2810417H13Rik	6.36444	4.60018	2.19805	0.318887	1.14966
Cit	6.36361	2.37721	2.68747	0.182119	0.733938
Cdca2	6.36151	3.20391	3.4325	0.521639	0.969025
Gch1	6.33878	1.65048	2.992	0.671257	0.749258
Rai14	6.32277	12.444	11.1135	1.14656	1.01595
Pisd-ps1	6.27687	0.0458164	0.0652147	0.0529541	0.0417633
Hist1h3c	6.22825	2.50647	1.25663	1.04005	0.842866
Meis2	6.22522	12.1048	20.209	4.21315	2.63429
Phf19	6.21383	1.20403	0.378607	0.152043	1.19769
Dzip1l	6.20451	2.60738	1.9003	0.491241	0.339689
9930012K11Rik	6.2035	3.40904	1.39133	0.339172	0.839097
Zfp862-ps	6.20001	13.7719	24.4691	4.77598	3.34371
Sertad4	6.18584	16.9326	10.7636	1.08989	0.333346
St6gal1	6.16676	9.79276	7.57599	1.14503	0.9829
Lsp1	6.14107	11.4846	3.00372	1.19264	4.104
Sprr2k	6.14084	0.86588	0.193259	0	0
Gsg2	6.13441	2.06579	3.24287	1.03874	0.712966
Inhba	6.1014	3.36591	1.98121	0.251546	0.071666
Cyp26b1	6.058	15.2051	4.18008	0.282388	0.743293
Stx1a	6.01197	2.76994	3.79198	1.28272	0.491163
Trerf1	6.00483	5.99197	1.74717	0.221677	0.599452
Bdnf	5.97293	1.87797	1.14743	0.0902239	0.0965994
Rnd1	5.95609	0.854498	1.97628	0.751649	0.603969
Btbd11	5.93635	2.17091	4.62649	0.289555	0.413863
2610203C20Rik	5.93126	11.944	3.1377	0.770355	0.78109
Prkca	5.88858	7.13966	4.61456	1.14867	0.961108
Gpr126	5.88553	1.2635	0.355775	0.0870434	0.0832975
1700003E16Rik	5.88492	6.79321	3.21387	1.01118	0.455906
Flrt2	5.84576	2.10486	3.22999	0.371668	0.444446
H2-D1	5.82932	4.03468	3.43982	1.08946	16.6684
Amot	5.82445	7.22542	4.18811	1.3174	0.691975
Hip1	5.81999	20.7558	6.67166	3.81544	1.39861
Fgf7	5.81393	7.98003	11.0215	0.375549	0.561597
Cd14	5.81275	3.46333	2.60864	0.226269	0.569153
Mmp16	5.75333	7.84433	2.7815	0.763711	0.642684
Frmd4a	5.72069	4.29343	1.96	0.359301	0.284525
Ccrn4l	5.71565	1.02354	1.93134	18.2053	25.5863
Gnb4	5.70037	4.70208	2.29225	0.28758	0.280631
Atg16l2	5.69196	1.22785	0.783701	0.279813	0.429391
Slc1a6	5.68436	0.220661	0.0446095	0	0.141131
Slit2	5.66375	3.02834	3.79565	0.749063	0.738206
Gstt3	5.60006	16.5866	4.22689	1.4616	3.39118
Dhx32	5.58866	3.44102	2.91894	4.7237	16.6519
Klrg2	5.56642	1.04109	2.37139	0.913759	1.31339
Lrrc73	5.48248	7.42331	9.5991	1.88493	1.0191
Xkr5	5.38649	10.685	5.69881	0.440049	1.709
Ror2	5.38461	5.31886	6.47388	0.982537	0.594989
Apoo	5.37263	3.81161	2.6936	18.8712	23.9973
Sobp	5.324	11.7733	7.84921	1.96437	0.817816
Zfp365	5.30143	6.58697	6.35477	0.734031	0.529076
Slc5a6	5.29748	4.15068	3.96764	62.4401	30.3594
Stxbp2	5.27251	4.83432	1.36367	1.82376	18.9441
Stradb	5.27187	4.11526	3.6761	9.47664	30.1808
Ada	5.23745	3.80735	3.11072	0.598022	0.435542
Syt13	5.23521	0.837144	4.63165	0.793726	0.861245
Gmpr	5.20021	3.96075	0.874979	0.786741	0.488071
Sulf1	5.17703	3.43156	1.34065	0.0609843	0.220855
Ppp2r5a	5.17656	4.20265	4.55093	55.2968	133.221
D030025P21Rik	5.17006	2.80818	3.08024	1.08054	0.273529
2010010A06Rik	5.1343	0.545576	0.198804	0.102238	0.086272
Mtcl1	5.11848	1.57982	2.71532	0.461423	0.134293
Syt17	5.10108	1.79041	2.05678	1.02901	0.528397
1190002F15Rik	5.09993	2.61469	2.42307	0.514065	0.184018
Dtx4	5.08026	0.723813	1.48957	4.22165	12.4459
Rnd3	5.0563	7.65633	13.2948	2.87509	0.673228
Jam3	5.0243	10.1374	8.92826	2.06553	1.21089
Cachd1	5.02322	6.77208	11.2594	2.4528	1.26821
Smpdl3b	5.02219	4.90292	2.26389	0.328609	0.521874
Aqp5	5.00996	2.70718	0.294295	0.0257828	0.164666
Ltbp4	5.00565	13.2079	16.5658	3.69636	2.01305
Eln	1.56711	232.468	216.139	2.33644	1.85985
Rmrp	2.0932	138.597	7.19938	191.756	2.74521
Cmtm5	0	125.191	43.7651	1.3088	0
Papss2	4.3605	99.9172	24.7428	2.94014	1.26222
Cytl1	0.856888	89.7309	76.7681	5.14005	0.229688
Fbn2	2.23346	85.2782	48.1242	2.74804	0.344199
Cryab	51.7293	85.1825	32.2973	0.424899	3.96375
Ppp1r1b	0.237874	77.9835	121.34	85.946	4.50759
Trpv4	22.1568	76.5373	166.579	3.28526	1.48606
Rprl3	2.89414	74.8367	3.73309	125.135	4.19466
Col16a1	56.7391	74.5787	69.8012	3.6258	3.83698
Col11a1	1.48533	72.7287	39.1491	5.71131	1.20648
Nrep	1.61672	69.6168	7.45918	4.30807	2.19413
Cald1	46.4892	64.3145	31.0949	4.23654	2.95779
Loxl3	67.8143	62.5564	59.6848	2.7102	4.55218
Nuak1	6.87909	62.2756	12.7082	1.37071	1.81351
Efhd1	1.55866	58.8788	32.7	1.55379	4.37245
Wfdc18	0	56.9511	63.261	0.765093	0
Krt15	0.172051	55.9582	27.8506	0.297814	0.0334695
Fzd9	2.54194	54.2007	23.3324	3.1665	0.906312
Fgfr3	0.243404	54.1078	15.5214	3.57084	0.787768
Dlx5	7.99098	53.9363	35.7751	1.58101	1.0284
Dpysl3	13.122	53.7437	28.8684	0.798034	0.645454
Klf2	49.0994	52.4303	4.72612	1.53933	11.0132
Cd276	27.5334	52.2047	22.6832	3.16819	3.77533
Ccdc80	3.91901	49.8312	26.9291	4.13851	17.6987
Unc5b	29.3357	49.2208	36.9377	2.73714	3.37644
Fam101b	11.0015	48.7097	5.6372	1.44363	2.06887
S100b	0.378966	47.3589	24.9236	4.39838	18.0681
Aspn	2.23607	45.9775	20.3362	6.35958	2.77729
Matn4	0.657503	44.4881	33.7805	0.921597	1.21077
Arhgef19	23.24	43.7026	30.4362	3.41113	3.11079
Pdgfrl	4.60084	43.3169	38.0862	1.64008	2.15387
Slpi	4.43895	43.0403	166.045	1.37827	0.22649
Antxr1	14.315	42.1573	19.6791	3.18402	3.38038
Rhoj	10.9293	41.9535	17.4231	4.50844	3.76652
Sparcl1	0.357631	41.5839	35.5517	0.832937	4.87156
Snai2	4.11285	41.2004	21.7334	1.52871	1.77673
Chadl	0.550405	40.3424	29.8582	0.868479	1.7351
1500015O10Rik	0.479929	40.016	38.6077	3.38789	1.53439
Fam3c	10.6909	39.7392	20.245	4.52143	2.96882
Rpph1	3.61942	38.3054	1.94068	63.5802	2.42259
Lpcat4	34.5146	37.2248	22.5548	3.94327	1.60303
Dab2	17.0334	37.1082	11.9351	3.41731	2.77895
Mical1	17.0302	36.7024	12.2237	1.99656	3.84737
Ctgf	339.182	36.5061	4.8151	4.17176	0.449512
Tox	1.87747	35.779	8.57338	2.30275	0.754757
Tril	3.43889	33.8593	10.7354	0.988505	2.1074
Rasa4	69.2047	33.6214	9.93965	2.59516	4.21209
Gstt1	4.1723	33.4027	15.6123	0.0833785	3.40482
AF357399	114.076	33.3862	0	0	17.9856
Kirrel	0	32.9588	0	6.42202	4.92291
Scube3	0.219089	32.8184	17.8392	0.248554	0.177962
Vdr	19.9291	32.5714	129.285	4.47363	1.45071
Itpr3	69.6905	32.3347	19.0875	3.70124	2.19741
B9d1	23.3522	32.191	23.2279	4.27111	3.03879
Trnp1	10.9003	32.1513	14.2904	1.06745	3.69287
Npnt	6.99094	30.8896	26.3633	1.54636	2.07322
Elk3	34.9134	30.7441	10.6731	2.26791	3.83849
Gata2	23.6641	30.7244	34.4513	3.39652	0.847758
Rab32	13.7257	30.467	8.71463	1.8947	3.63192
Fmnl3	55.0834	30.3175	20.0686	3.14521	2.6949
Tm4sf1	66.339	30.2162	33.965	1.62774	3.995
Col27a1	0.428802	29.9653	11.2707	1.96935	14.4215
Sfrp1	1.92887	29.2368	22.3346	1.30523	0.831891
Myof	24.0397	28.8944	49.0514	0.979392	2.71576
Mfi2	0.0332033	28.3352	16.3769	0.332968	0.0064591
Tacc2	27.208	27.9951	17.9938	3.52873	4.38296
Sall2	13.91	27.8699	18.8529	4.86826	3.06331
Thbs3	2.6854	27.7002	27.2057	0.518382	0.539729
Plk2	50.2229	27.3738	10.8176	2.66594	0.723792
Uhrf1	63.9539	27.2252	15.2573	2.04288	4.00956
Col9a1	0	27.225	14.3207	3.34868	0.030571
Igf1	0.336732	26.8486	19.4979	5.80842	2.6494
Rin3	25.4712	26.7122	12.2804	4.3606	3.47839
Itgb3	1.42765	26.4933	95.4721	1.71227	0.77604
Calhm2	25.3804	25.7801	13.4353	1.52757	2.39707
Cldn19	0.0099777	25.6575	2.11021	0.101569	0.0109677
Tns3	17.1165	25.2812	4.95135	1.60404	1.23245
Tgfb2	0.863011	25.2637	3.48352	2.62463	0.428602
Ncs1	56.6782	25.1603	24.1754	4.90876	2.49341
Lrrc75b	1.03359	25.0237	4.64111	0.376443	0.142447
Tle6	18.8995	24.819	4.98161	3.8836	2.89696
Fkbp11	37.3558	24.7529	11.6073	2.57672	4.54467
Krt13	0.467025	24.6852	25.3573	0.641151	0.57009
Plekho1	16.6459	24.4629	8.11929	2.78755	2.59796
Gp1bb	4.26619	24.4523	7.73516	3.38145	5.83922
Apod	0.603185	24.4019	20.9572	3.59809	8.04395
Psrc1	20.7096	24.1333	12.9429	2.9211	1.51953
Dlx2	11.8993	24.1226	12.4291	0.683778	0.256859
Foxm1	75.8514	23.999	21.3754	2.55226	4.64431
Emb	3.25822	23.9777	36.2024	18.6491	2.21429
Shroom1	1.98973	23.8249	7.60751	1.94304	0.596097
Tmem45a	7.30497	23.8113	10.4181	2.0097	2.85107
Aff3	0.567022	23.7356	3.88329	2.29942	1.44863
6030419C18Rik	16.81	23.2949	18.3665	4.85926	2.29907
Pdzd4	12.358	23.2056	12.9243	4.5426	2.56011
Tiam2	3.93967	23.1983	11.3201	1.31315	0.986926
Glipr1	27.381	23.1672	9.83704	3.05503	3.11689
Apbb1	24.4206	23.1552	16.0591	3.45151	2.65862
Efnb1	4.08397	22.9047	10.7915	4.88338	5.57155
Rab31	26.4206	22.6694	13.5482	3.06705	3.67198
C1qtnf5	4.97463	22.664	12.8454	0.520509	3.15943
C1qtnf1	16.36	22.5502	8.3145	1.03302	4.78538
Gjb4	20.7512	22.4571	11.2321	0.282356	0.846935
Calml4	3.4537	22.2382	11.8311	0.242522	2.46314
Pianp	6.74158	22.1786	9.17876	1.29839	1.37704
Gdf11	12.424	21.9981	13.5773	3.11436	1.48495
Lbh	4.54157	21.9715	0.502231	2.36692	18.4207
Lcat	1.46348	21.9673	11.9337	1.85136	0.426277
Atp8b2	15.1578	21.5749	21.3442	3.15831	2.33693
Id2	9.68167	21.5292	12.6159	0.56881	2.12838
2610035D17Rik	0.659888	21.4215	9.90171	0.749166	0.153885
Mapre2	11.004	21.3024	12.3824	2.57979	3.75768
Scrg1	0.0876275	21.193	10.5496	0	0
Fam212a	7.71957	21.1672	6.76703	3.93488	2.81899
Mfap4	0.896158	21.1459	21.0735	14.0723	2.52784
Plekho2	25.9824	21.017	17.964	4.12923	3.48623
Fam114a1	10.3265	20.9089	12.8293	2.97601	2.83812
Iglon5	8.66228	20.8596	10.8924	1.55403	2.36797
Ptx3	4.22124	20.8495	20.9857	1.69238	0.663282
Hip1	5.81999	20.7558	6.67166	3.81544	1.39861
Epb4.1l4b	2.56302	20.7357	5.51977	2.08609	11.8691
Cdca8	41.9206	20.6695	20.2584	2.44376	4.23108
Meg3	7.49512	20.6679	15.5947	1.28329	0.981744
Speg	15.0373	20.4659	10.2046	1.6355	1.79308
Pik3ip1	3.03994	20.4612	3.53807	1.40588	2.00616
Ly6c2	4.69963	20.4598	17.0371	0.682795	3.82184
Dnmt1	28.7559	20.4557	25.0384	4.41739	3.74833
Abtb2	6.40071	20.4352	15.5279	2.77173	1.44752
Pold1	53.5065	20.428	17.1636	4.8464	4.48101
Cdr2l	18.4423	20.0123	17.3226	3.52846	1.72614
Kif22	38.2657	19.83	20.8153	1.28031	4.40982
Hr	2.26486	19.8036	10.5472	1.37728	2.55875
Igsf3	2.04453	19.7444	21.6362	2.77232	1.16928
Sema3f	34.127	19.7029	9.2141	3.0157	3.56572
Klf4	10.6439	19.6984	10.7331	2.3955	1.99327
Atp1b1	9.01653	19.6654	23.4794	2.68856	4.11856
Npcd	50.6728	19.5761	18.0187	3.39629	3.32816
Gng8	4.58575	19.482	4.04964	0.314892	0.840194
Col8a2	2.07145	19.3518	10.1395	0.909035	2.52306
Extl1	0	19.3514	5.17989	1.76955	0.292571
Pgm5	0.464432	19.3326	3.57921	0.65238	2.57538
C1ra	4.9424	19.3007	15.6921	1.491	4.35424
Capn6	2.72334	19.1821	10.2439	1.70249	1.29637
Ephb6	7.82526	19.1319	12.1622	2.98327	1.80823
Masp1	27.0035	19.0406	28.8224	0.629659	1.01823
Col9a2	0	18.7088	8.58201	1.5531	0.017396
Lrrk1	37.8486	18.626	9.75511	2.71182	3.60716
Fblim1	17.2077	18.5756	3.7518	0.963705	1.24042
Mtmr11	15.1193	18.0689	6.40484	0.61617	1.60186
Tgfb3	11.6198	18.0487	40.1957	3.31644	1.91084
Def6	26.3874	17.7587	7.29625	2.18176	2.47858
Mcm6	41.3706	17.7246	11.3324	4.23486	3.9474
Gm5424	81.4912	17.679	9.53351	0.502754	0.613132
Ift122	7.93189	17.6053	10.6673	3.83644	1.73815
Socs1	14.784	17.6022	9.318	1.45696	1.2829
Gjb5	3.38474	17.5732	2.97911	0.0300649	0.278355
Leprel1	0.456796	17.4411	27.1283	3.59893	0.841936
Pkd2	8.58948	17.3682	14.8041	2.88697	2.40876
Sox12	4.54317	17.2944	6.95306	5.00917	2.36306
Col11a2	0.184175	17.2544	7.1864	1.93622	1.19739
Cdt1	48.9734	16.989	13.9352	3.86233	4.43734
Sertad4	6.18584	16.9326	10.7636	1.08989	0.333346
Nsg1	9.83825	16.7917	17.9895	2.18562	2.28607
Gtse1	47.0757	16.79	17.1344	1.65636	2.15808
Gadd45b	29.0033	16.649	13.0921	1.32318	0.750788
Spire2	14.1052	16.6284	1.206	0.557329	0.683701
Lmnb1	25.5778	16.6146	15.3336	2.29735	2.99387
Etv4	47.1268	16.5916	5.70273	0.0537335	0.824533
Gstt3	5.60006	16.5866	4.22689	1.4616	3.39118
2610524H06Rik	4.93951	16.523	9.17541	2.04968	2.34535
Mia	0.119721	16.3643	19.3163	2.35975	0.191647
Spon2	13.1975	16.2986	3.10497	1.49723	1.47226
Tnni1	0.289377	16.2388	6.90457	0.311969	0.675271
Rfc3	17.1763	16.2019	10.0795	2.07333	3.83646
Scrn1	3.87857	16.1061	0.646585	0.222767	0.438252
Ly6e	12.9208	16.0894	11.9619	1.20215	3.04962
4933412E12Rik	8.8496	15.9431	5.61826	1.05414	1.26394
Cdsn	2.5831	15.8622	9.60755	2.88418	2.67433
Wnt5b	3.6251	15.7976	4.07391	2.59388	0.965511
Tyro3	10.4506	15.795	4.86314	1.98587	1.76077
Chaf1b	37.8138	15.7287	7.78507	1.14986	2.80541
Prss23	28.9846	15.672	10.8656	0.576533	0.747702
Kctd12	0.383979	15.6477	3.82969	1.14597	2.23894
Eno3	11.4906	15.643	6.1833	1.79102	3.24749
Cdc42ep3	15.3223	15.6381	2.21907	1.97672	3.08249
Cand2	6.38727	15.5725	6.1575	1.35904	1.5533
Grem1	6.49507	15.5621	12.8921	0.343522	0.397038
Tmem2	3.71128	15.4936	18.8695	1.6314	0.872368
Nrbp2	1.75179	15.4587	7.37699	2.38334	3.68526
Lfng	19.1722	15.4577	1.3453	0.941044	10.8285
Gpc6	0.860187	15.4144	14.1792	2.04319	1.79316
Kif18b	42.4051	15.3418	17.9304	0.998858	3.22792
Dennd2a	7.11227	15.2233	7.06555	1.40018	1.63285
Cyp26b1	6.058	15.2051	4.18008	0.282388	0.743293
Cdk1	24.2574	15.1647	13.0048	1.94762	3.22749
Dpysl2	10.6152	15.0373	4.71082	0.620644	1.8478
Arhgef10l	4.5646	14.9854	4.50997	2.02775	3.36628
Myo1e	21.5447	14.9686	15.4269	2.79921	1.91009
Wscd2	1.03569	14.9269	47.6936	1.59704	0.608351
Eml1	18.3474	14.8541	8.23099	1.36971	2.12108
Cnp	6.60735	14.7979	3.00559	2.28044	4.9313
Dclk2	2.71544	14.74	2.02339	1.25303	0.772504
Tvp23a	11.1835	14.7182	8.8433	1.57995	1.8013
Ccnf	46.1035	14.6673	13.5786	3.40304	3.42504
Mdfi	0.0739885	14.5832	3.75269	4.83408	1.23752
Mylip	1.21997	14.5755	11.6412	3.96199	3.65478
Suv39h1	31.3634	14.5342	13.6421	4.74578	4.13396
Actn3	2.54973	14.4618	5.26463	0.340241	0.868637
Slc25a34	0.261846	14.4173	2.69735	31.8278	77.7623
Ccnb2	23.0694	14.3137	9.95156	2.04354	4.43878
Ttc7	40.4615	14.2959	16.4705	4.46931	3.493
Rgs12	18.7045	14.2823	8.24137	1.75486	1.54461
Hs6st2	3.74116	14.1597	5.62936	0.532432	0.529785
Fgfr2	0.564347	14.1273	13.8996	7.78242	1.57712
Runx2	7.24252	14.0379	6.71699	1.89442	1.23232
Pear1	32.4837	13.9665	10.1685	3.65174	2.74247
Clec3b	1.68122	13.9563	15.1824	4.42014	27.3106
Pdia5	27.6817	13.9286	10.7363	2.77523	4.39037
Fez1	25.9469	13.8806	2.56541	0.590742	1.46312
Gfpt2	0.731425	13.842	22.5264	2.49966	0.88908
Zfp862-ps	6.20001	13.7719	24.4691	4.77598	3.34371
Tram2	8.94443	13.7226	12.8146	1.91953	1.07202
Apbb2	6.79073	13.71	14.4722	1.91761	0.914702
Angptl1	0	13.6932	0.912177	2.09097	0.598972
Phldb2	4.7614	13.6429	6.26119	0.972583	0.93085
Zfp821	4.42268	13.6342	8.91601	2.75807	2.12012
Tmem107	11.6627	13.4927	7.57808	1.74986	2.07658
Clcf1	24.667	13.3634	20.4826	0.802747	1.08244
Chaf1a	31.1655	13.3612	13.4641	3.41323	2.6881
Prickle3	20.9961	13.3529	9.48607	1.64925	1.83135
Osr2	19.7976	13.3316	22.0931	3.22614	2.37534
Kank1	0.772644	13.2711	3.38441	4.43461	1.97399
Brsk1	9.31896	13.2183	11.8054	1.20331	0.657347
Ltbp4	5.00565	13.2079	16.5658	3.69636	2.01305
Renbp	11.8187	13.1361	3.29112	1.00962	2.64889
Adamtsl5	13.8469	13.1031	3.90362	0.5422	1.82815
Mmp15	1.01096	13.0848	4.93614	2.62591	3.1025
Klhdc8a	119.649	13.0608	10.1832	0.909505	1.60518
C430049B03Rik	2.19983	13.0576	9.78025	1.93566	0.684105
Sat2	3.64662	13.027	8.13747	2.39502	1.26037
Iqgap3	24.0242	12.9858	8.82699	0.727849	3.18952
Tacc3	26.6513	12.9687	16.0108	1.89428	3.09161
Cchcr1	21.112	12.8917	5.44728	1.78992	2.50958
Col10a1	0.127067	12.8497	9.48866	0.208699	0.106035
BC022687	22.3457	12.808	5.76745	1.27212	1.50188
Trib2	4.70763	12.7943	14.8999	3.74189	1.76473
Lynx1	7.07504	12.7401	7.98728	0.449093	2.10476
Aif1l	6.54218	12.7387	4.79924	0.209502	0.439071
Ripk3	18.7122	12.5923	10.0995	1.03917	2.08392
Adamts7	7.42027	12.5265	5.88077	0.833641	1.52887
Ncaph	10.7559	12.5224	9.3292	1.18769	2.13079
D630045J12Rik	4.24876	12.5099	14.4839	1.76875	1.00937
Rspo2	3.77814	12.4613	2.06528	0.860886	2.71866
Rai14	6.32277	12.444	11.1135	1.14656	1.01595
Pid1	1.64176	12.4	13.4133	1.5526	1.98313
Lect1	0	12.3775	4.70562	5.67365	0.107674
Ifitm1	4.79054	12.3668	10.6229	0.86738	1.43408
Chtf18	33.8974	12.3493	10.3809	2.54189	2.67338
Tmpo	27.4664	12.3072	8.48015	2.92533	4.46921
Efna1	11.5981	12.2667	12.3581	2.08434	1.3313
Ackr3	8.55039	12.2645	50.5823	2.74845	1.71977
Layn	8.13627	12.2125	12.7812	1.61668	1.9396
Adamtsl3	4.99897	12.1994	6.27724	0.719136	0.535735
Anxa3	68.5923	12.1812	3.8478	0.0822367	0.835715
Meis2	6.22522	12.1048	20.209	4.21315	2.63429
Fam110a	33.1726	12.0651	9.24481	1.30271	3.72257
Kifc1	25.5704	12.0442	12.5066	1.66765	2.92806
Gxylt2	14.0836	12.0284	23.0241	1.70113	1.19055
Kif20a	18.2366	11.9884	14.6843	1.65131	3.51624
2610203C20Rik	5.93126	11.944	3.1377	0.770355	0.78109
Hpcal1	27.9369	11.9192	9.16443	1.42976	4.78992
Pxdc1	2.46893	11.8422	2.07515	0.0208213	0.197301
Emp2	17.5297	11.797	4.06231	0.40016	0.833117
Krt19	0.458444	11.7763	4.36036	0.0385766	0.146333
Sobp	5.324	11.7733	7.84921	1.96437	0.817816
Rnf157	8.37063	11.7639	5.31443	0.870118	1.92577
Ccdc136	6.92457	11.653	10.6178	1.15802	0.53916
Orai2	11.3068	11.5146	8.48664	0.973538	0.744818
Tpbg	10.8432	11.5125	8.59136	1.43076	1.34322
Thbd	17.075	11.5107	37.0018	4.22541	4.63498
Tenm3	2.46841	11.4878	6.16801	0.573431	0.551357
Lsp1	6.14107	11.4846	3.00372	1.19264	4.104
Zfp521	2.59366	11.4402	3.92089	0.978645	0.499174
Serping1	1.63373	11.4361	10.0146	0.504568	1.76557
Osgin2	0.909141	11.4194	5.52065	5.93471	2.33498
Bglap2	0.0752995	11.4001	9.58255	1.09739	0
Spata24	4.07343	11.3722	4.38086	1.38476	1.33543
Il17b	0	11.3484	2.22982	0.184788	0
Eva1c	20.1335	11.2611	20.6487	0.520194	1.82802
Crabp1	6.75993	11.0383	9.56198	0.377736	0.196151
Actg2	74.2353	11.0116	10.4857	0.0811805	0.530419
Arl4c	8.85751	10.962	9.24808	1.05096	0.369789
Lrrc8c	14.1587	10.9579	9.16599	0.947894	0.845873
Acan	0	10.8873	3.03244	0.624385	0
Ajuba	48.4931	10.8658	5.286	2.71423	2.05894
Dync2li1	3.03144	10.7754	5.78402	1.60072	1.04823
Crip2	21.309	10.7587	3.43676	5.66951	3.76554
Cryl1	7.22037	10.7515	3.48882	0.860469	1.73703
Plxnb1	0.21802	10.712	3.64345	0.366571	0.0278888
Xkr5	5.38649	10.685	5.69881	0.440049	1.709
Dact1	0.415004	10.6474	10.6022	0.381786	0.38202
Lhfp	13.8264	10.6093	4.77757	1.44922	0.899867
Pcolce2	0.733946	10.5307	8.73904	0.0898241	0.517717
Egr1	35.7801	10.513	3.72374	20.7627	2.37495
Gja4	2.0682	10.479	10.9572	0.0468686	0.132549
Fam198b	9.39077	10.4738	7.04639	0.712486	1.04676
F2r	16.0325	10.4608	9.75018	2.6023	1.92059
Gli2	2.771	10.4072	9.39267	2.40595	1.14246
Gpr39	0.992499	10.4069	1.24796	0.640389	1.44417
Frzb	0.0308185	10.3122	1.56169	2.27622	0.307212
Fam19a5	0.107376	10.285	4.71073	0.792798	0.930408
A330074K22Rik	3.95643	10.2753	2.58835	0.572594	0.78168
Tmem158	2.72772	10.2751	3.76694	0.290538	0.708746
Rnase4	4.40781	10.2489	8.72899	1.02962	2.06493
Rrm1	26.1913	10.2484	8.01258	3.00508	3.92929
Sema4c	4.60132	10.1755	9.59003	2.28777	1.12752
Selp	1.83966	10.163	8.52591	1.79518	0.481484
Chst7	12.2698	10.1455	3.91784	0.352261	0.877447
Jam3	5.0243	10.1374	8.92826	2.06553	1.21089
P4ha3	8.96401	10.1312	7.87986	0.144233	0.637178
Il17d	1.66152	10.1271	4.59253	1.22353	1.42906
Cdk19	0.682095	10.1187	2.96684	1.22011	0.901045
Pak1	33.7456	10.109	4.1796	1.271	1.48433
Fndc4	6.92785	10.1029	4.12413	0.587872	1.1849
Kctd11	19.0516	10.097	13.2437	2.90028	2.11685
Msx1	2.4967	10.0735	29.5278	3.2211	1.09573
Acss2	2.95651	10.0618	3.84202	6.1744	45.5073
2010111I01Rik	12.5252	9.99316	2.97771	1.77754	1.64072
Col4a5	3.29756	9.97856	7.33303	1.49377	0.97958
Gpr64	0.570186	9.95588	4.95228	1.34082	2.56543
Pla2g4a	9.61355	9.93015	2.93645	0.383584	0.275207
Hmga2	56.8822	9.89139	12.0299	0.468139	0.457185
Prcp	3.20057	9.878	7.32946	1.10944	1.22524
Igf1r	18.4059	9.86358	20.9922	3.44884	1.07305
Car5b	2.76529	9.85563	4.26432	83.6439	33.1782
St6gal1	6.16676	9.79276	7.57599	1.14503	0.9829
Metrnl	43.3216	9.77229	9.60304	3.54435	4.60271
Paqr8	2.56209	9.70026	9.65056	2.71256	0.936763
S1pr1	4.0714	9.6881	13.6816	1.70304	1.13855
C1rb	2.40671	9.67465	8.16699	0.658001	2.24414
Bmf	0.559505	9.63639	8.15756	5.04719	0.712149
5730416F02Rik	20.6786	9.60241	4.32495	0.924896	0.93696
Lppr3	1.24727	9.59267	2.90924	1.71042	0.618379
Phactr1	2.24488	9.57955	0.472742	0.55528	0.405413
Zfr2	1.33496	9.57816	3.14356	2.07518	1.55358
Ccna2	25.2488	9.56705	9.07553	1.20029	2.70906
B3gnt9	2.59744	9.56472	4.38396	0.522249	1.23246
Asap3	3.35007	9.53468	2.55728	1.20721	0.781276
Rbpj	9.55712	9.46524	4.73976	1.33117	1.63645
Tbkbp1	0.448879	9.44918	3.43582	7.22342	17.7547
C1s1	1.23187	9.44105	8.15709	1.20167	2.89759
Rhpn1	1.0409	9.42103	3.11443	0.140313	0.299175
Ass1	44.1236	9.38082	5.39903	0.26499	0.285739
Arrdc1	16.7678	9.36368	6.48534	0.419467	1.86938
Proser2	0.767736	9.33701	1.20268	1.72151	2.40712
Aldh1l2	3.33549	9.32636	5.29417	0.803127	1.7087
P2rx6	2.08971	9.31803	4.08711	0.126251	0.629718
Gins2	19.1317	9.31784	5.59861	2.35934	3.48598
Dlk1	0.209692	9.30986	11.8821	0.375973	0.400923
Spc24	17.0145	9.29864	5.62232	0.783057	2.05792
Mthfd1l	15.9059	9.28386	12.8925	1.60909	3.39772
Pir	4.72972	9.26264	4.04081	0.799986	1.92315
Gas7	0.18633	9.2147	3.39823	1.1783	0.352789
Pde4a	3.72432	9.18492	1.66512	0.714697	6.34432
Hmga2-ps1	28.9027	9.16202	17.7229	0.746765	2.2226
Fam189b	11.1306	9.12789	3.04924	1.2009	1.07073
Ston1	7.41041	9.07776	9.12665	1.49152	0.819604
Fyn	7.74853	9.0061	10.5184	1.71691	0.722622
Foxf2	7.44648	8.95158	15.7792	1.35539	0.363119
Dnph1	42.8472	8.92407	5.9536	3.74864	2.37059
Camk1g	0.0178874	8.88987	1.5544	2.55038	2.11378
Mpp2	7.44653	8.88235	4.33774	0.206527	4.10461
Bglap	0.231119	8.87744	7.28082	0.0819585	0
Lrrn3	0.60656	8.87683	0.289774	0.0961305	0.352445
Bmp4	8.55571	8.84211	1.57753	0.539228	0.871151
Gper1	0.320626	8.7872	0.372814	0.162596	0.406324
Fen1	21.7724	8.77814	10.7928	2.49903	3.18612
Sik1	4.87068	8.77703	39.7799	9.62902	2.16973
Chn2	2.36542	8.73502	9.86061	2.13482	0.838472
Btbd19	11.6085	8.70997	2.68819	1.77374	1.95009
Fbxo2	0.292276	8.70724	4.71551	0.602882	0.410993
Cdca5	17.566	8.6963	8.00488	0.877134	1.90169
Gpr56	2.09239	8.66557	1.18925	0.020722	0.465089
Wwc2	14.4005	8.65243	4.66373	2.17642	2.76562
Igdcc4	0.392051	8.64268	2.71508	0.474038	0.50641
Adamts4	1.36918	8.60332	3.6459	1.18247	0.35567
Susd5	0	8.60168	1.93832	0.110599	0
Armcx6	2.09083	8.58501	4.49749	1.50779	1.47315
Pld2	18.0407	8.58405	3.71842	2.23858	7.8199
Epas1	0.117599	8.5211	4.85433	1.38626	5.08946
Mybl2	31.1747	8.50499	6.01453	0.823666	0.951755
Il4ra	25.7158	8.49925	6.36196	1.6666	2.68343
Vash2	6.44679	8.49411	5.07109	0.590927	0.536834
Itpripl2	14.9025	8.47008	13.8614	2.17889	1.29618
Ssfa2	1.45091	8.46622	3.26307	3.29389	11.7371
Ltbp1	23.587	8.45661	8.63664	4.27756	1.64872
Man2a1	9.87941	8.45633	22.4142	3.66961	3.63376
Klf5	11.8125	8.45279	11.2861	3.86093	0.183008
Gm12942	1.64246	8.44889	1.52622	1.36206	3.54666
Lrrc75a	8.97297	8.43834	2.15603	0.959553	1.66766
Fhl2	42.2662	8.43529	2.42957	2.94693	1.70056
Troap	23.4973	8.41739	13.6882	1.0413	2.41066
Slc22a17	0.482135	8.39977	6.2633	3.30071	2.32177
Peak1	8.85404	8.39565	20.8515	2.77178	2.14993
Procr	9.20678	8.35281	5.88303	0.461731	0.637881
Fhl1	17.9703	8.32495	3.05494	0.649388	6.07444
Dusp14	45.6442	8.27601	12.799	2.08426	1.82299
Rps6ka2	11.9876	8.26374	17.1411	4.35212	1.18369
Ncam1	13.7677	8.22682	16.1479	0.806523	0.733302
Gdpd2	0.290912	8.21634	9.5465	2.27773	2.37114
Fxyd3	2.24361e-06	8.17252	3.72535	1.78631	1.66853e-07
Pvrl1	26.3649	8.14992	8.26455	1.65667	1.36851
Arhgap10	14.8032	8.11136	4.42779	2.49531	2.68332
Tmem121	8.19632	8.08727	6.80658	1.1559	1.17352
Fam83d	16.1991	8.05795	10.3385	1.2392	2.89965
Lpar1	3.75796	8.02879	3.73892	1.04522	0.670624
Tmem44	1.08831	8.01881	0.446572	0.934432	0.769814
Daam2	1.31153	7.99546	8.40502	1.27713	1.1263
Myl6b	4.66656	7.99331	3.99659	8.69253	25.3552
Fgf7	5.81393	7.98003	11.0215	0.375549	0.561597
Tmem151a	2.1851	7.97652	1.91091	0.658756	0.551681
Espl1	23.2744	7.97229	9.0242	0.653115	1.77378
Nav2	8.60745	7.95779	3.66209	0.221623	0.271341
Neurl2	3.51449	7.93773	1.52772	0.555934	5.21804
Mmp16	5.75333	7.84433	2.7815	0.763711	0.642684
Slc7a2	1.05398	7.80637	8.88574	1.64892	0.508367
Itprip	23.3793	7.8006	8.96293	0.883671	0.924785
Chil1	0	7.77022	5.85302	0.943863	0.0468611
Srgap3	2.49107	7.73297	3.69596	0.32064	0.619201
Ppp3ca	2.16875	7.71402	25.7358	6.23203	2.76451
Foxred2	1.53627	7.7084	8.37326	1.44873	1.42016
Kifc5b	16.3675	7.69573	8.42639	1.09661	1.58656
Clec11a	0.368491	7.68229	3.4535	0.721035	1.11298
Sorcs2	16.0039	7.66365	6.08507	2.4794	1.07826
Rnd3	5.0563	7.65633	13.2948	2.87509	0.673228
Ccdc109b	18.6661	7.64035	3.27794	0.429934	0.492995
Arhgap28	2.30629	7.6021	4.50766	1.19369	0.787759
Mex3a	1.73843	7.57735	3.41629	1.77205	0.348032
Stard8	0.475986	7.55471	1.20532	0.128318	0.272366
Hist1h2aa	13.8836	7.55171	4.70892	1.87774	1.32468
Ier5	17.1426	7.438	8.08487	3.93369	1.90003
Cd59a	1.27622	7.42807	5.11958	3.69468	14.0317
Lrrc73	5.48248	7.42331	9.5991	1.88493	1.0191
Kazald1	0.253236	7.39982	5.42601	2.34356	2.92346
Spata6	3.3555	7.37134	2.6937	1.21333	1.17789
Dusp6	14.9503	7.3681	5.09122	1.24626	3.31002
Wdr54	16.6217	7.33765	8.28469	1.84417	2.40983
Rian	4.87754	7.31323	4.74616	0.481215	0.450093
Ddah1	23.3008	7.29542	15.6819	2.75492	1.95992
Map2k6	1.6549	7.23006	1.38988	0.92916	1.1193
Amot	5.82445	7.22542	4.18811	1.3174	0.691975
Arrdc3	0.878857	7.17747	11.7098	3.8693	3.24639
Prkca	5.88858	7.13966	4.61456	1.14867	0.961108
Gm2115	16.041	7.1277	12.8624	0.772074	1.29727
Slit3	0.478801	7.12054	7.74474	1.67211	1.98493
Melk	9.13599	7.09295	4.7353	0.420249	1.23131
Bub1b	10.7869	7.09227	7.0061	0.867712	1.32475
Wnt5a	2.34587	7.081	12.1242	0.920145	3.1736
Rspo3	0.177013	7.06862	3.43846	1.56553	0.433219
Erbb3	0.0455704	7.06801	0.832598	0.0091016	0.0315344
Ifi27l2a	1.17722	7.0663	5.11993	3.40017	1301.97
C77080	18.525	7.05562	2.09281	3.59911	8.31554
Foxd1	2.56867	7.03335	6.66066	1.73013	1.13117
Edil3	0.946311	6.99634	4.76846	6.49308	0.802579
Nol4l	0.0321374	6.97386	1.05135	0.756101	0.290052
Wdr62	17.0543	6.97252	6.1592	1.05516	1.91964
Hmgb2	6.90822	6.9515	6.90124	0.565673	0.677566
Tcea3	3.51772	6.90922	0.393106	0.0332965	0.394051
Mapkbp1	4.77445	6.88469	10.3959	27.0781	2.95367
Dclk1	1.73432	6.88119	7.14453	0.574989	0.808135
Decr2	2.37139	6.87368	1.58926	3.89975	12.2304
Faah	0.799585	6.86867	1.44348	0.269095	0.290614
1500009L16Rik	0.388624	6.85063	1.86776	0.318854	0.281154
Pcyt1b	2.91391	6.83261	1.30894	0.0900009	0.409999
Fbxl2	2.60728	6.8163	1.34834	0.426542	0.526188
Wfdc12	0	6.81248	9.93124	0.306383	2.39128
1700003E16Rik	5.88492	6.79321	3.21387	1.01118	0.455906
Nptxr	21.0125	6.7824	8.84272	1.04578	1.79503
Cachd1	5.02322	6.77208	11.2594	2.4528	1.26821
Epha2	55.5878	6.75202	4.43054	0.493496	0.658614
Atp1b2	0.0788995	6.75167	1.50585	0.934401	0.165245
Car11	0.549605	6.75128	2.11026	0.985945	3.15514
Slc26a7	0	6.74735	2.04858	0.140896	0.0906523
L3mbtl3	1.57957	6.73827	1.12454	1.32384	1.06127
Ccdc24	25.4091	6.73728	5.16768	1.65916	1.38229
Ednra	0.453206	6.73502	1.58733	2.48339	5.57837
Ccdc8	1.50662	6.70965	3.09417	0.593298	0.538791
Enoph1	15.6041	6.70091	4.96051	3.15918	2.0763
Chst1	32.5742	6.69364	6.89914	2.13488	1.95094
Olfm2	0.319254	6.68181	5.50411	0.669816	5.19433
Vill	3.42864	6.64753	2.69785	0.143751	1.18468
BC030867	26.56	6.59441	8.07561	1.39799	2.48963
Zfp365	5.30143	6.58697	6.35477	0.734031	0.529076
Podnl1	25.2928	6.58389	2.50714	0.0906315	0.50271
Tspan6	2.17207	6.57523	3.57327	0.752435	0.571916
Gli3	2.76978	6.56036	5.32316	0.500364	0.576546
Cyp4f17	2.02863	6.53287	3.62855	3.8745	17.2123
Mapk12	21.8688	6.52407	1.24972	1.13634	2.93826
Col9a3	0	6.50229	0.463803	0	1.89025e-06
Sirt3	4.27614	6.49427	4.17396	8.78469	24.4969
Fes	3.66231	6.42974	1.61208	0.550802	0.841099
Ptplad2	4.11921	6.42282	1.75551	0.35722	1.10137
Tpx2	11.132	6.42146	6.97711	0.875283	1.8018
Fmod	0.33335	6.408	3.11006	0.118905	0.142801
Plac1	1.08181	6.39778	5.08301	0.664961	0.117173
Loxl4	20.5809	6.38755	1.48159	0.330963	0.16462
Mettl7a1	0.880123	6.38406	1.6645	0.485121	4.34227
Lphn3	1.56156	6.34242	2.3687	1.18395	0.400346
A930004D18Rik	3.5747	6.33467	2.13144	0.610654	0.813956
Lurap1l	13.54	6.32887	7.4899	1.64418	2.07475
Kcnab2	3.89165	6.32759	4.53465	0.443337	1.02585
Tmem119	9.8095	6.3166	99.5718	0.559579	1.86096
Ccdc184	15.4014	6.31339	1.06997	0	0.181484
Fam131b	12.3032	6.2973	3.09246	0.166109	0.258346
Kitl	1.68342	6.28566	15.6571	5.9205	1.36019
Nyap1	2.32171	6.26879	4.89494	0.277981	0.237903
Rab6b	19.9459	6.24815	9.47156	2.0414	3.71443
Runx3	20.9798	6.24179	4.22461	1.33329	0.976786
A230065H16Rik	0	6.22818	3.2151	0.0995305	0
Cd109	7.11475	6.22267	7.11762	0.0441226	0.558394
Unc5c	1.60136	6.21225	3.13809	0.667059	0.43103
Cdk5rap2	3.07083	6.20695	3.17232	1.06021	0.803356
Tspan5	11.8003	6.20423	3.99504	2.51281	1.21944
Dram1	2.63183	6.20087	4.53695	0.849555	16.901
Chst2	4.07358	6.16449	8.48381	0.808732	0.437321
Enpp2	0.0914318	6.14904	4.54672	13.4976	0.497323
Rgs4	0.789205	6.143	1.46219	0.211746	0.274925
Kcnd1	3.92674	6.13977	2.59498	0.116869	1.25738
Pcdh7	7.83089	6.13021	3.92124	0.562909	1.84489
Dzip1	1.02054	6.10503	3.56599	0.949654	0.724082
Fam198a	0.0626465	6.10492	0.316332	0.538547	1.00837
Adamts14	11.5441	6.10006	1.59984	0.629307	1.03096
Serpina3n	0.034667	6.09189	10.4667	14.191	0.549935
Pcdhga1	0.45612	6.08775	4.04945	1.58627	1.16285
Kif26b	0.878269	6.08688	3.05782	3.12406	0.103678
Aldh3b1	0.998893	6.07404	1.00164	1.14339	12.9036
Apln	3.16739	6.05142	3.03437	3.25537	15.8032
Swap70	3.88814	6.04535	2.43967	0.785497	0.811114
Ccng2	1.13733	6.02555	4.69543	9.33684	16.9678
Rab36	2.19445	6.01994	1.21191	0.337503	0.613284
Kif2c	8.89584	6.00866	6.21084	0.710647	1.48994
Tnfrsf21	2.91649	5.99274	31.4187	10.5458	3.26973
Trerf1	6.00483	5.99197	1.74717	0.221677	0.599452
Mgat3	2.93454	5.94592	3.29478	0.63413	0.395857
Exoc3l4	4.43939	5.94543	0.716872	0.569951	1.65793
Sox13	1.0319	5.94069	2.36706	0.830318	0.364969
Fam229b	1.2666	5.89706	2.6	0.864102	1.61073
Ccdc74a	1.38339	5.88929	2.21006	0.306949	0.153204
Tes	14.4392	5.88004	3.96496	0.122528	0.155794
Enah	1.97673	5.87279	2.19859	1.03187	0.393819
Pde4d	1.89905	5.87127	16.745	6.17129	4.88314
Frat1	1.08232	5.8704	3.77909	3.58078	11.6412
Mapk11	16.3419	5.85612	2.48026	2.92505	2.43353
Ankrd13d	3.54738	5.85427	1.11343	0.508735	0.388463
Dlx1	2.21231	5.84255	1.73114	0.0700565	0.0270259
Mfap2	0.102262	5.84251	3.74257	0.19998	0.47459
Naprt	3.70138	5.83258	0.836002	0.518671	5.72175
4931406C07Rik	1.86817	5.80035	2.55014	32.1606	100.475
Syne3	9.85336	5.79319	7.8996	1.12697	1.13876
Calcrl	1.10035	5.74549	0.868559	0.433421	0.557009
Crim1	10.8006	5.72983	5.01788	0.943867	0.700127
Tonsl	15.0594	5.72212	5.41383	1.66925	1.91273
Stk36	3.67807	5.7168	4.01614	0.736159	0.737181
L1cam	3.33978	5.70869	1.80697	0.158353	0.070869
Gstm7	0.46495	5.70451	4.42741	0.135587	0.907882
Fah	9.79212	5.7044	1.76008	2.93545	75.3923
Specc1	21.1693	5.67145	2.11024	1.12343	1.1436
Ngf	147.934	5.66435	15.0278	0.200733	0.739066
Shc2	10.9305	5.65242	2.22982	1.25488	0.925236
Bambi	1.03665	5.6409	5.08318	0.633732	0.346872
Plagl1	0.563419	5.64077	4.07899	1.73959	0.674682
Acot1	0.773097	5.63997	1.62105	1.44304	3.25332
Spcs3	14.7277	5.63285	4.90259	2.77568	2.06984
Ddi2	4.40516	5.62132	20.7847	10.845	3.05726
Prim1	7.3431	5.61296	3.77886	1.15956	0.995398
Reck	0.919684	5.60632	4.78057	1.23658	0.814231
Syk	18.2877	5.60595	0.989953	0.105679	0.319111
Stac2	4.2615	5.59437	3.80651	0.151233	0.235694
1110046J04Rik	7.76609	5.57303	1.19622	0.060601	0.748643
Shisa8	0.0271699	5.56431	3.29054	2.1985	0.185754
Vangl2	1.90741	5.56142	3.65922	1.09549	0.576102
Pcdh18	3.68345	5.55875	2.21069	0.523614	0.299667
Slc25a24	9.76725	5.55642	1.92298	0.718463	1.02706
Zfp467	1.69445	5.54408	0.582833	1.09761	3.99473
Polm	13.3289	5.53286	4.03912	0.905686	1.54867
Dstyk	1.08528	5.52492	4.27895	1.42032	0.97404
Trp53inp1	0.941772	5.52296	9.25918	7.75239	1.51188
Dlk2	10.8551	5.52137	0.506715	0	0.0333976
Ehd3	0.653656	5.5183	14.9051	0.921955	0.542326
Mki67	4.82798	5.48466	4.93686	0.415359	1.39001
Notum	1.09284	5.46877	26.7885	1.0293	0.481656
Smim5	0.236235	5.46467	2.65584	13.5541	3.64377
Ctsh	9.28069	5.46085	3.43077	0.834331	0.90111
Slc20a1	13.933	5.45618	13.0234	1.84465	2.48312
Nfkbie	3.92413	5.44168	4.02566	0.316122	0.750734
Zcchc5	0.190187	5.3452	0.621612	1.77795	3.44299
Zfp827	4.20045	5.34157	3.59064	0.741946	0.676216
Hid1	4.14369	5.32731	0.802197	0.243724	1.04973
Sgcd	2.7462	5.32336	2.3301	5.51309	16.0191
Pxylp1	2.7278	5.32084	1.52427	0.229775	0.379584
Ror2	5.38461	5.31886	6.47388	0.982537	0.594989
Cd74	0.958874	5.30704	8.83168	0.456273	0.229757
D430020J02Rik	2.29418	5.28989	3.56495	0.955759	0.710889
Phyh	1.12292	5.28299	2.01408	4.58228	11.9021
Wdr35	1.73592	5.26896	1.87298	0.789473	0.840244
Fbln7	0.0779591	5.26018	3.66396	0.31946	0.753318
4930427A07Rik	12.5449	5.24929	8.28742	0.539769	1.2964
Lypd1	0.198146	5.23307	0.113526	0.213855	0.567056
Enho	0.86901	5.22368	1.33214	0.33595	0.576131
Slc43a2	0.661954	5.21266	19.7745	13.3206	3.34387
Echdc3	2.10145	5.21249	1.68985	2.44319	18.2826
Ccdc92	12.2614	5.21163	4.92148	1.18402	0.499518
Cav2	3.30958	5.20745	1.33872	4.65888	14.1024
Col23a1	0.0790153	5.19506	5.18215	0.886331	1.17746
Diras2	0.33336	5.18855	0.0999174	0.0770577	0.108458
Syngap1	1.68716	5.1693	1.60996	0.443594	0.421206
Glt8d2	2.0329	5.1501	2.80116	0.0356392	1.68809
Wfdc3	0.276979	5.14502	7.97239	3.00792	0.112954
Usp2	1.65162	5.1445	4.36673	22.4335	14.4064
Lef1	1.09497	5.11475	7.31173	3.11615	0.247955
Tagln	127.934	5.09014	3.3984	1.17054	2.61617
Sap30	2.0796	5.0841	4.58728	0.769289	0.782586
Pdgfa	14.526	5.07346	5.34278	3.70457	1.53898
Npy1r	2.11894	5.04524	1.57115	0.109449	0.194477
Thbs1	36.6413	5.03786	3.04596	0.87788	3.2188
Spc25	4.11121	5.03721	9.05016	0.7622	1.98314
Pth1r	0.107654	5.02761	0.389233	0.0790574	0.222742
Csgalnact1	1.96986	5.00791	0.809035	0.235691	0.228391
Scarna17	979.691	0	443.162	0	200.559
Ramp3	13.004	1.33763	352.622	0.706401	0.336402
Eln	1.56711	232.468	216.139	2.33644	1.85985
Trpv4	22.1568	76.5373	166.579	3.28526	1.48606
Slpi	4.43895	43.0403	166.045	1.37827	0.22649
Vdr	19.9291	32.5714	129.285	4.47363	1.45071
Ppp1r1b	0.237874	77.9835	121.34	85.946	4.50759
Tmem119	9.8095	6.3166	99.5718	0.559579	1.86096
Itgb3	1.42765	26.4933	95.4721	1.71227	0.77604
Cytl1	0.856888	89.7309	76.7681	5.14005	0.229688
Col16a1	56.7391	74.5787	69.8012	3.6258	3.83698
Wfdc18	0	56.9511	63.261	0.765093	0
Loxl3	67.8143	62.5564	59.6848	2.7102	4.55218
Ackr3	8.55039	12.2645	50.5823	2.74845	1.71977
Myof	24.0397	28.8944	49.0514	0.979392	2.71576
Fbn2	2.23346	85.2782	48.1242	2.74804	0.344199
Wscd2	1.03569	14.9269	47.6936	1.59704	0.608351
Fkbp5	8.90376	1.78414	45.6341	70.016	3.00528
Cmtm5	0	125.191	43.7651	1.3088	0
Tgfb3	11.6198	18.0487	40.1957	3.31644	1.91084
Sik1	4.87068	8.77703	39.7799	9.62902	2.16973
Col11a1	1.48533	72.7287	39.1491	5.71131	1.20648
1500015O10Rik	0.479929	40.016	38.6077	3.38789	1.53439
Pdgfrl	4.60084	43.3169	38.0862	1.64008	2.15387
Thbd	17.075	11.5107	37.0018	4.22541	4.63498
Unc5b	29.3357	49.2208	36.9377	2.73714	3.37644
Emb	3.25822	23.9777	36.2024	18.6491	2.21429
Dlx5	7.99098	53.9363	35.7751	1.58101	1.0284
Nmnat2	2.27443	4.35884	35.7015	0.960202	0.589302
Sparcl1	0.357631	41.5839	35.5517	0.832937	4.87156
Gata2	23.6641	30.7244	34.4513	3.39652	0.847758
Tm4sf1	66.339	30.2162	33.965	1.62774	3.995
Matn4	0.657503	44.4881	33.7805	0.921597	1.21077
Efhd1	1.55866	58.8788	32.7	1.55379	4.37245
Tgfbr3	4.6594	4.80835	32.6905	25.3255	9.56412
Cryab	51.7293	85.1825	32.2973	0.424899	3.96375
Tnfrsf21	2.91649	5.99274	31.4187	10.5458	3.26973
Cald1	46.4892	64.3145	31.0949	4.23654	2.95779
Slc23a2	3.17434	4.59898	30.7007	5.2675	3.46753
Arhgef19	23.24	43.7026	30.4362	3.41113	3.11079
Chadl	0.550405	40.3424	29.8582	0.868479	1.7351
Msx1	2.4967	10.0735	29.5278	3.2211	1.09573
Dpysl3	13.122	53.7437	28.8684	0.798034	0.645454
Masp1	27.0035	19.0406	28.8224	0.629659	1.01823
Adarb1	1.7932	2.75475	28.6858	5.99346	2.89024
Krt15	0.172051	55.9582	27.8506	0.297814	0.0334695
Thbs3	2.6854	27.7002	27.2057	0.518382	0.539729
Leprel1	0.456796	17.4411	27.1283	3.59893	0.841936
Ccdc80	3.91901	49.8312	26.9291	4.13851	17.6987
Notum	1.09284	5.46877	26.7885	1.0293	0.481656
Npnt	6.99094	30.8896	26.3633	1.54636	2.07322
Ppp3ca	2.16875	7.71402	25.7358	6.23203	2.76451
Krt13	0.467025	24.6852	25.3573	0.641151	0.57009
Dnmt1	28.7559	20.4557	25.0384	4.41739	3.74833
S100b	0.378966	47.3589	24.9236	4.39838	18.0681
Papss2	4.3605	99.9172	24.7428	2.94014	1.26222
Zfp862-ps	6.20001	13.7719	24.4691	4.77598	3.34371
Ncs1	56.6782	25.1603	24.1754	4.90876	2.49341
Atp1b1	9.01653	19.6654	23.4794	2.68856	4.11856
Fzd9	2.54194	54.2007	23.3324	3.1665	0.906312
B9d1	23.3522	32.191	23.2279	4.27111	3.03879
Gxylt2	14.0836	12.0284	23.0241	1.70113	1.19055
Cd276	27.5334	52.2047	22.6832	3.16819	3.77533
Lpcat4	34.5146	37.2248	22.5548	3.94327	1.60303
Gfpt2	0.731425	13.842	22.5264	2.49966	0.88908
Man2a1	9.87941	8.45633	22.4142	3.66961	3.63376
Sfrp1	1.92887	29.2368	22.3346	1.30523	0.831891
Rgs2	2.38402	4.87509	22.0998	18.0019	7.39544
Osr2	19.7976	13.3316	22.0931	3.22614	2.37534
Snai2	4.11285	41.2004	21.7334	1.52871	1.77673
Igsf3	2.04453	19.7444	21.6362	2.77232	1.16928
Ism1	0.0460617	1.12931	21.3799	3.13412	3.35201
Foxm1	75.8514	23.999	21.3754	2.55226	4.64431
Atp8b2	15.1578	21.5749	21.3442	3.15831	2.33693
Mfap4	0.896158	21.1459	21.0735	14.0723	2.52784
Igf1r	18.4059	9.86358	20.9922	3.44884	1.07305
Ptx3	4.22124	20.8495	20.9857	1.69238	0.663282
Apod	0.603185	24.4019	20.9572	3.59809	8.04395
Peak1	8.85404	8.39565	20.8515	2.77178	2.14993
Kif22	38.2657	19.83	20.8153	1.28031	4.40982
Ddi2	4.40516	5.62132	20.7847	10.845	3.05726
Eva1c	20.1335	11.2611	20.6487	0.520194	1.82802
Clcf1	24.667	13.3634	20.4826	0.802747	1.08244
Aspn	2.23607	45.9775	20.3362	6.35958	2.77729
Cdca8	41.9206	20.6695	20.2584	2.44376	4.23108
Fam3c	10.6909	39.7392	20.245	4.52143	2.96882
Meis2	6.22522	12.1048	20.209	4.21315	2.63429
Fmnl3	55.0834	30.3175	20.0686	3.14521	2.6949
Slc43a2	0.661954	5.21266	19.7745	13.3206	3.34387
Antxr1	14.315	42.1573	19.6791	3.18402	3.38038
Igf1	0.336732	26.8486	19.4979	5.80842	2.6494
Mia	0.119721	16.3643	19.3163	2.35975	0.191647
Itpr3	69.6905	32.3347	19.0875	3.70124	2.19741
Tmem2	3.71128	15.4936	18.8695	1.6314	0.872368
Sall2	13.91	27.8699	18.8529	4.86826	3.06331
Efnb2	8.57583	4.18444	18.49	0.904377	0.273762
6030419C18Rik	16.81	23.2949	18.3665	4.85926	2.29907
Notch3	3.4806	4.20382	18.182	4.00484	1.71083
1810011O10Rik	0.457103	2.74103	18.1191	21.0229	7.03631
Npcd	50.6728	19.5761	18.0187	3.39629	3.32816
Tacc2	27.208	27.9951	17.9938	3.52873	4.38296
Nsg1	9.83825	16.7917	17.9895	2.18562	2.28607
Plekho2	25.9824	21.017	17.964	4.12923	3.48623
Kif18b	42.4051	15.3418	17.9304	0.998858	3.22792
Scube3	0.219089	32.8184	17.8392	0.248554	0.177962
Hmga2-ps1	28.9027	9.16202	17.7229	0.746765	2.2226
Rhoj	10.9293	41.9535	17.4231	4.50844	3.76652
Cdr2l	18.4423	20.0123	17.3226	3.52846	1.72614
Cry1	2.4893	2.34514	17.285	2.84519	5.28347
Pold1	53.5065	20.428	17.1636	4.8464	4.48101
Rps6ka2	11.9876	8.26374	17.1411	4.35212	1.18369
Gtse1	47.0757	16.79	17.1344	1.65636	2.15808
Ly6c2	4.69963	20.4598	17.0371	0.682795	3.82184
Pde4d	1.89905	5.87127	16.745	6.17129	4.88314
Ltbp4	5.00565	13.2079	16.5658	3.69636	2.01305
Gprc5a	55.8419	2.58252	16.5022	0.630258	0.460874
Ttc7	40.4615	14.2959	16.4705	4.46931	3.493
Mfi2	0.0332033	28.3352	16.3769	0.332968	0.0064591
Ncam1	13.7677	8.22682	16.1479	0.806523	0.733302
Apbb1	24.4206	23.1552	16.0591	3.45151	2.65862
Tacc3	26.6513	12.9687	16.0108	1.89428	3.09161
Foxf2	7.44648	8.95158	15.7792	1.35539	0.363119
C1ra	4.9424	19.3007	15.6921	1.491	4.35424
Ddah1	23.3008	7.29542	15.6819	2.75492	1.95992
Kitl	1.68342	6.28566	15.6571	5.9205	1.36019
Gstt1	4.1723	33.4027	15.6123	0.0833785	3.40482
Meg3	7.49512	20.6679	15.5947	1.28329	0.981744
Acsl4	1.99572	3.16543	15.5343	2.44878	2.77243
Abtb2	6.40071	20.4352	15.5279	2.77173	1.44752
Fgfr3	0.243404	54.1078	15.5214	3.57084	0.787768
Myo1e	21.5447	14.9686	15.4269	2.79921	1.91009
Ifi204	2.03442	2.28832	15.3553	5.52783	2.65868
Lmnb1	25.5778	16.6146	15.3336	2.29735	2.99387
Uhrf1	63.9539	27.2252	15.2573	2.04288	4.00956
Clec3b	1.68122	13.9563	15.1824	4.42014	27.3106
Ngf	147.934	5.66435	15.0278	0.200733	0.739066
Ehd3	0.653656	5.5183	14.9051	0.921955	0.542326
Trib2	4.70763	12.7943	14.8999	3.74189	1.76473
Pkd2	8.58948	17.3682	14.8041	2.88697	2.40876
Kif20a	18.2366	11.9884	14.6843	1.65131	3.51624
D630045J12Rik	4.24876	12.5099	14.4839	1.76875	1.00937
Apbb2	6.79073	13.71	14.4722	1.91761	0.914702
Col9a1	0	27.225	14.3207	3.34868	0.030571
Trnp1	10.9003	32.1513	14.2904	1.06745	3.69287
Gpc6	0.860187	15.4144	14.1792	2.04319	1.79316
Cdt1	48.9734	16.989	13.9352	3.86233	4.43734
Fgfr2	0.564347	14.1273	13.8996	7.78242	1.57712
Itpripl2	14.9025	8.47008	13.8614	2.17889	1.29618
Fam107a	0	1.79446	13.8412	14.8986	11.0437
Plxna2	4.50643	2.01448	13.7282	4.06396	2.91463
Troap	23.4973	8.41739	13.6882	1.0413	2.41066
S1pr1	4.0714	9.6881	13.6816	1.70304	1.13855
Suv39h1	31.3634	14.5342	13.6421	4.74578	4.13396
Ccnf	46.1035	14.6673	13.5786	3.40304	3.42504
Gdf11	12.424	21.9981	13.5773	3.11436	1.48495
Rab31	26.4206	22.6694	13.5482	3.06705	3.67198
Chaf1a	31.1655	13.3612	13.4641	3.41323	2.6881
Calhm2	25.3804	25.7801	13.4353	1.52757	2.39707
Pid1	1.64176	12.4	13.4133	1.5526	1.98313
Rnd3	5.0563	7.65633	13.2948	2.87509	0.673228
Kctd11	19.0516	10.097	13.2437	2.90028	2.11685
Gadd45b	29.0033	16.649	13.0921	1.32318	0.750788
Map4k5	2.22083	4.5552	13.0361	2.50912	1.50869
Slc20a1	13.933	5.45618	13.0234	1.84465	2.48312
Cdk1	24.2574	15.1647	13.0048	1.94762	3.22749
Psrc1	20.7096	24.1333	12.9429	2.9211	1.51953
Pdzd4	12.358	23.2056	12.9243	4.5426	2.56011
Mthfd1l	15.9059	9.28386	12.8925	1.60909	3.39772
Grem1	6.49507	15.5621	12.8921	0.343522	0.397038
Gm2115	16.041	7.1277	12.8624	0.772074	1.29727
C1qtnf5	4.97463	22.664	12.8454	0.520509	3.15943
Tnfrsf1b	9.34014	3.33349	12.8321	1.73879	1.11825
Fam114a1	10.3265	20.9089	12.8293	2.97601	2.83812
Tram2	8.94443	13.7226	12.8146	1.91953	1.07202
Dusp14	45.6442	8.27601	12.799	2.08426	1.82299
Layn	8.13627	12.2125	12.7812	1.61668	1.9396
Nuak1	6.87909	62.2756	12.7082	1.37071	1.81351
Id2	9.68167	21.5292	12.6159	0.56881	2.12838
Kifc1	25.5704	12.0442	12.5066	1.66765	2.92806
Dlx2	11.8993	24.1226	12.4291	0.683778	0.256859
Mapre2	11.004	21.3024	12.3824	2.57979	3.75768
Efna1	11.5981	12.2667	12.3581	2.08434	1.3313
Rin3	25.4712	26.7122	12.2804	4.3606	3.47839
Mical1	17.0302	36.7024	12.2237	1.99656	3.84737
Prg4	0.1764	0.081352	12.1784	9.63597	62.4221
Ephb6	7.82526	19.1319	12.1622	2.98327	1.80823
Wnt5a	2.34587	7.081	12.1242	0.920145	3.1736
Hmga2	56.8822	9.89139	12.0299	0.468139	0.457185
Ly6e	12.9208	16.0894	11.9619	1.20215	3.04962
Dab2	17.0334	37.1082	11.9351	3.41731	2.77895
Lcat	1.46348	21.9673	11.9337	1.85136	0.426277
Dlk1	0.209692	9.30986	11.8821	0.375973	0.400923
Calml4	3.4537	22.2382	11.8311	0.242522	2.46314
Brsk1	9.31896	13.2183	11.8054	1.20331	0.657347
Arrdc3	0.878857	7.17747	11.7098	3.8693	3.24639
Rdh10	2.48182	2.48732	11.6629	2.24974	2.27174
Mylip	1.21997	14.5755	11.6412	3.96199	3.65478
Fkbp11	37.3558	24.7529	11.6073	2.57672	4.54467
Lcn2	0.0619765	0.592356	11.4154	265.293	6.05955
Tead4	14.348	4.34943	11.3362	7.80157	0.31581
Mcm6	41.3706	17.7246	11.3324	4.23486	3.9474
Tiam2	3.93967	23.1983	11.3201	1.31315	0.986926
Klf5	11.8125	8.45279	11.2861	3.86093	0.183008
Col27a1	0.428802	29.9653	11.2707	1.96935	14.4215
Cachd1	5.02322	6.77208	11.2594	2.4528	1.26821
Gjb4	20.7512	22.4571	11.2321	0.282356	0.846935
Rai14	6.32277	12.444	11.1135	1.14656	1.01595
Fgf7	5.81393	7.98003	11.0215	0.375549	0.561597
Gja4	2.0682	10.479	10.9572	0.0468686	0.132549
Iglon5	8.66228	20.8596	10.8924	1.55403	2.36797
Prss23	28.9846	15.672	10.8656	0.576533	0.747702
Plk2	50.2229	27.3738	10.8176	2.66594	0.723792
Fen1	21.7724	8.77814	10.7928	2.49903	3.18612
Efnb1	4.08397	22.9047	10.7915	4.88338	5.57155
Cgref1	25.5018	2.27079	10.7841	0.575479	2.20236
Sertad4	6.18584	16.9326	10.7636	1.08989	0.333346
Pdia5	27.6817	13.9286	10.7363	2.77523	4.39037
Tril	3.43889	33.8593	10.7354	0.988505	2.1074
Klf4	10.6439	19.6984	10.7331	2.3955	1.99327
Elk3	34.9134	30.7441	10.6731	2.26791	3.83849
Ift122	7.93189	17.6053	10.6673	3.83644	1.73815
Ifitm1	4.79054	12.3668	10.6229	0.86738	1.43408
Ccdc136	6.92457	11.653	10.6178	1.15802	0.53916
Dact1	0.415004	10.6474	10.6022	0.381786	0.38202
Scrg1	0.0876275	21.193	10.5496	0	0
Hr	2.26486	19.8036	10.5472	1.37728	2.55875
Fyn	7.74853	9.0061	10.5184	1.71691	0.722622
Actg2	74.2353	11.0116	10.4857	0.0811805	0.530419
Serpina3n	0.034667	6.09189	10.4667	14.191	0.549935
Tmem45a	7.30497	23.8113	10.4181	2.0097	2.85107
Mapkbp1	4.77445	6.88469	10.3959	27.0781	2.95367
Chtf18	33.8974	12.3493	10.3809	2.54189	2.67338
Fam83d	16.1991	8.05795	10.3385	1.2392	2.89965
Capn6	2.72334	19.1821	10.2439	1.70249	1.29637
Speg	15.0373	20.4659	10.2046	1.6355	1.79308
Klhdc8a	119.649	13.0608	10.1832	0.909505	1.60518
Pear1	32.4837	13.9665	10.1685	3.65174	2.74247
Col8a2	2.07145	19.3518	10.1395	0.909035	2.52306
Ripk3	18.7122	12.5923	10.0995	1.03917	2.08392
Rfc3	17.1763	16.2019	10.0795	2.07333	3.83646
Serping1	1.63373	11.4361	10.0146	0.504568	1.76557
Ccnb2	23.0694	14.3137	9.95156	2.04354	4.43878
Rasa4	69.2047	33.6214	9.93965	2.59516	4.21209
Wfdc12	0	6.81248	9.93124	0.306383	2.39128
Spidr	1.61946	2.68611	9.92858	2.49175	1.07073
2610035D17Rik	0.659888	21.4215	9.90171	0.749166	0.153885
Chn2	2.36542	8.73502	9.86061	2.13482	0.838472
Ap1s2	2.61947	4.27453	9.8552	1.94558	0.731848
Glipr1	27.381	23.1672	9.83704	3.05503	3.11689
C430049B03Rik	2.19983	13.0576	9.78025	1.93566	0.684105
Lrrk1	37.8486	18.626	9.75511	2.71182	3.60716
F2r	16.0325	10.4608	9.75018	2.6023	1.92059
Man1a	1.99239	2.36685	9.70573	1.79346	0.820921
Paqr8	2.56209	9.70026	9.65056	2.71256	0.936763
Cdsn	2.5831	15.8622	9.60755	2.88418	2.67433
Metrnl	43.3216	9.77229	9.60304	3.54435	4.60271
Lrrc73	5.48248	7.42331	9.5991	1.88493	1.0191
Sema4c	4.60132	10.1755	9.59003	2.28777	1.12752
Bglap2	0.0752995	11.4001	9.58255	1.09739	0
Crabp1	6.75993	11.0383	9.56198	0.377736	0.196151
Gdpd2	0.290912	8.21634	9.5465	2.27773	2.37114
Gm5424	81.4912	17.679	9.53351	0.502754	0.613132
Col10a1	0.127067	12.8497	9.48866	0.208699	0.106035
Prickle3	20.9961	13.3529	9.48607	1.64925	1.83135
Rab6b	19.9459	6.24815	9.47156	2.0414	3.71443
Bcl6	1.8813	3.43708	9.43542	20.398	17.1138
Gli2	2.771	10.4072	9.39267	2.40595	1.14246
Ncaph	10.7559	12.5224	9.3292	1.18769	2.13079
Socs1	14.784	17.6022	9.318	1.45696	1.2829
Trp53inp1	0.941772	5.52296	9.25918	7.75239	1.51188
Ezr	1.40888	0.581457	9.25569	2.26832	1.0464
Glis3	0.804226	3.45191	9.25267	0.623516	0.271184
Arl4c	8.85751	10.962	9.24808	1.05096	0.369789
Fam110a	33.1726	12.0651	9.24481	1.30271	3.72257
Sema3f	34.127	19.7029	9.2141	3.0157	3.56572
Pianp	6.74158	22.1786	9.17876	1.29839	1.37704
2610524H06Rik	4.93951	16.523	9.17541	2.04968	2.34535
Lrrc8c	14.1587	10.9579	9.16599	0.947894	0.845873
Hpcal1	27.9369	11.9192	9.16443	1.42976	4.78992
Ston1	7.41041	9.07776	9.12665	1.49152	0.819604
Ccna2	25.2488	9.56705	9.07553	1.20029	2.70906
Spc25	4.11121	5.03721	9.05016	0.7622	1.98314
Cited1	0.076385	1.61238	9.0288	1.14039	0.933392
Espl1	23.2744	7.97229	9.0242	0.653115	1.77378
Itprip	23.3793	7.8006	8.96293	0.883671	0.924785
Jam3	5.0243	10.1374	8.92826	2.06553	1.21089
Zfp821	4.42268	13.6342	8.91601	2.75807	2.12012
Slc7a2	1.05398	7.80637	8.88574	1.64892	0.508367
Tvp23a	11.1835	14.7182	8.8433	1.57995	1.8013
Nptxr	21.0125	6.7824	8.84272	1.04578	1.79503
Cd74	0.958874	5.30704	8.83168	0.456273	0.229757
Iqgap3	24.0242	12.9858	8.82699	0.727849	3.18952
Pcolce2	0.733946	10.5307	8.73904	0.0898241	0.517717
Rnase4	4.40781	10.2489	8.72899	1.02962	2.06493
Rab32	13.7257	30.467	8.71463	1.8947	3.63192
Ltbp1	23.587	8.45661	8.63664	4.27756	1.64872
Tpbg	10.8432	11.5125	8.59136	1.43076	1.34322
Col9a2	0	18.7088	8.58201	1.5531	0.017396
Tox	1.87747	35.779	8.57338	2.30275	0.754757
Selp	1.83966	10.163	8.52591	1.79518	0.481484
Orai2	11.3068	11.5146	8.48664	0.973538	0.744818
Chst2	4.07358	6.16449	8.48381	0.808732	0.437321
Tmpo	27.4664	12.3072	8.48015	2.92533	4.46921
Adamts9	0.326886	4.81624	8.44745	1.75562	1.79312
Kifc5b	16.3675	7.69573	8.42639	1.09661	1.58656
Daam2	1.31153	7.99546	8.40502	1.27713	1.1263
Foxred2	1.53627	7.7084	8.37326	1.44873	1.42016
C1qtnf1	16.36	22.5502	8.3145	1.03302	4.78538
4930427A07Rik	12.5449	5.24929	8.28742	0.539769	1.2964
Wdr54	16.6217	7.33765	8.28469	1.84417	2.40983
Pvrl1	26.3649	8.14992	8.26455	1.65667	1.36851
Rgs12	18.7045	14.2823	8.24137	1.75486	1.54461
Eml1	18.3474	14.8541	8.23099	1.36971	2.12108
C1rb	2.40671	9.67465	8.16699	0.658001	2.24414
Bmf	0.559505	9.63639	8.15756	5.04719	0.712149
C1s1	1.23187	9.44105	8.15709	1.20167	2.89759
Sat2	3.64662	13.027	8.13747	2.39502	1.26037
Plekho1	16.6459	24.4629	8.11929	2.78755	2.59796
Ier5	17.1426	7.438	8.08487	3.93369	1.90003
BC030867	26.56	6.59441	8.07561	1.39799	2.48963
Per2	0.632059	0.822989	8.07456	0.691406	1.89203
Rrm1	26.1913	10.2484	8.01258	3.00508	3.92929
Cdca5	17.566	8.6963	8.00488	0.877134	1.90169
Cd24a	0.260621	3.57316	7.99719	1.31648	0.0942081
Fst	3.64616	2.97083	7.98764	1.51137	0.648334
Lynx1	7.07504	12.7401	7.98728	0.449093	2.10476
Wfdc3	0.276979	5.14502	7.97239	3.00792	0.112954
Syne3	9.85336	5.79319	7.8996	1.12697	1.13876
P4ha3	8.96401	10.1312	7.87986	0.144233	0.637178
Sobp	5.324	11.7733	7.84921	1.96437	0.817816
Ndrg2	0.112025	3.75285	7.84	2.18956	1.20095
Chaf1b	37.8138	15.7287	7.78507	1.14986	2.80541
Slit3	0.478801	7.12054	7.74474	1.67211	1.98493
Gp1bb	4.26619	24.4523	7.73516	3.38145	5.83922
Mab21l1	0.684149	1.29874	7.70416	0.652704	0.415125
Shroom1	1.98973	23.8249	7.60751	1.94304	0.596097
Tmem107	11.6627	13.4927	7.57808	1.74986	2.07658
St6gal1	6.16676	9.79276	7.57599	1.14503	0.9829
Bcat1	12.0303	4.5973	7.52033	0.262673	0.184971
Lurap1l	13.54	6.32887	7.4899	1.64418	2.07475
Nrep	1.61672	69.6168	7.45918	4.30807	2.19413
Pdhx	4.60991	4.32451	7.45181	23.1896	28.6866
Dnajb9	2.64027	4.09692	7.39164	57.2269	41.843
Nrbp2	1.75179	15.4587	7.37699	2.38334	3.68526
Col4a5	3.29756	9.97856	7.33303	1.49377	0.97958
Prcp	3.20057	9.878	7.32946	1.10944	1.22524
Slc16a1	4.04862	1.17301	7.32916	15.5094	17.1389
Lef1	1.09497	5.11475	7.31173	3.11615	0.247955
Def6	26.3874	17.7587	7.29625	2.18176	2.47858
Bglap	0.231119	8.87744	7.28082	0.0819585	0
Tmed5	2.53124	2.07608	7.20564	12.9145	21.8055
Rmrp	2.0932	138.597	7.19938	191.756	2.74521
Col11a2	0.184175	17.2544	7.1864	1.93622	1.19739
Dclk1	1.73432	6.88119	7.14453	0.574989	0.808135
Cd109	7.11475	6.22267	7.11762	0.0441226	0.558394
Dennd2a	7.11227	15.2233	7.06555	1.40018	1.63285
Fam198b	9.39077	10.4738	7.04639	0.712486	1.04676
Bub1b	10.7869	7.09227	7.0061	0.867712	1.32475
Tpx2	11.132	6.42146	6.97711	0.875283	1.8018
Sox12	4.54317	17.2944	6.95306	5.00917	2.36306
Tnni1	0.289377	16.2388	6.90457	0.311969	0.675271
Hmgb2	6.90822	6.9515	6.90124	0.565673	0.677566
Chst1	32.5742	6.69364	6.89914	2.13488	1.95094
Maff	20.7872	2.01279	6.85236	2.22479	14.6646
Tmem121	8.19632	8.08727	6.80658	1.1559	1.17352
Fam212a	7.71957	21.1672	6.76703	3.93488	2.81899
Clmn	0.362919	4.13095	6.75415	0.85518	1.68606
Runx2	7.24252	14.0379	6.71699	1.89442	1.23232
Hip1	5.81999	20.7558	6.67166	3.81544	1.39861
Foxd1	2.56867	7.03335	6.66066	1.73013	1.13117
Ccnb1	12.6848	4.36306	6.64292	1.07036	1.7838
Spry1	0.771755	3.55123	6.62483	13.9904	3.84549
Arrdc1	16.7678	9.36368	6.48534	0.419467	1.86938
Ror2	5.38461	5.31886	6.47388	0.982537	0.594989
Tapt1	3.07979	4.67521	6.44878	27.0189	31.7686
Mtmr11	15.1193	18.0689	6.40484	0.61617	1.60186
Il4ra	25.7158	8.49925	6.36196	1.6666	2.68343
Zfp365	5.30143	6.58697	6.35477	0.734031	0.529076
Tgoln1	2.08385	3.02705	6.29884	5.49571	15.2554
Adamtsl3	4.99897	12.1994	6.27724	0.719136	0.535735
Snrk	2.54332	4.98783	6.27093	9.64034	45.3661
Sorbs1	3.21688	2.21653	6.26534	27.0217	98.2533
Slc22a17	0.482135	8.39977	6.2633	3.30071	2.32177
Phldb2	4.7614	13.6429	6.26119	0.972583	0.93085
Alcam	7.02886	4.47165	6.21447	1.45716	0.800293
Kif2c	8.89584	6.00866	6.21084	0.710647	1.48994
Eno3	11.4906	15.643	6.1833	1.79102	3.24749
Tenm3	2.46841	11.4878	6.16801	0.573431	0.551357
Wdr62	17.0543	6.97252	6.1592	1.05516	1.91964
Cand2	6.38727	15.5725	6.1575	1.35904	1.5533
Ntrk2	0.12738	4.21519	6.14859	2.47963	1.31587
Hk2	3.55714	2.18057	6.13434	26.8956	35.7702
Sorcs2	16.0039	7.66365	6.08507	2.4794	1.07826
Gm12238	8.69155	0	6.05595	0	10.9628
Mybl2	31.1747	8.50499	6.01453	0.823666	0.951755
Bmyc	1.40239	2.59911	5.96466	1.24243	0.745263
Dnph1	42.8472	8.92407	5.9536	3.74864	2.37059
Iqgap2	0.0144532	1.03798	5.94416	0.684424	0.204575
Cables1	1.58346	2.87719	5.90221	18.7331	19.6088
Procr	9.20678	8.35281	5.88303	0.461731	0.637881
Adamts7	7.42027	12.5265	5.88077	0.833641	1.52887
Chil1	0	7.77022	5.85302	0.943863	0.0468611
Map3k6	1.58831	1.041	5.84523	9.11015	1.41016
Dync2li1	3.03144	10.7754	5.78402	1.60072	1.04823
BC022687	22.3457	12.808	5.76745	1.27212	1.50188
Tspan11	14.771	2.00452	5.7575	3.61889	2.0338
Etv4	47.1268	16.5916	5.70273	0.0537335	0.824533
Xkr5	5.38649	10.685	5.69881	0.440049	1.709
Prc1	8.04339	4.29737	5.67453	0.491669	1.91828
Lrp3	0.540667	4.26205	5.6428	35.1497	44.5592
Fam101b	11.0015	48.7097	5.6372	1.44363	2.06887
Hs6st2	3.74116	14.1597	5.62936	0.532432	0.529785
Stk32b	0.213948	4.0327	5.62877	0.188708	0.0371862
Tspan7	2.26472	4.98698	5.62481	1.39725	0.350895
Spc24	17.0145	9.29864	5.62232	0.783057	2.05792
4933412E12Rik	8.8496	15.9431	5.61826	1.05414	1.26394
Gins2	19.1317	9.31784	5.59861	2.35934	3.48598
Gpd1	0.566399	3.50825	5.55025	1188.04	6596.7
Pank3	1.88597	3.17801	5.52541	29.9291	22.7948
Osgin2	0.909141	11.4194	5.52065	5.93471	2.33498
Epb4.1l4b	2.56302	20.7357	5.51977	2.08609	11.8691
Olfm2	0.319254	6.68181	5.50411	0.669816	5.19433
42432	0.457951	1.72461	5.50312	5.22939	2.37713
Ccl17	1.86837	2.40425	5.47213	0.514824	0
Cchcr1	21.112	12.8917	5.44728	1.78992	2.50958
Aqp2	0.0358668	0.353909	5.43539	0.223248	0
Kazald1	0.253236	7.39982	5.42601	2.34356	2.92346
Tonsl	15.0594	5.72212	5.41383	1.66925	1.91273
Ass1	44.1236	9.38082	5.39903	0.26499	0.285739
Pdgfa	14.526	5.07346	5.34278	3.70457	1.53898
Gli3	2.76978	6.56036	5.32316	0.500364	0.576546
Ssh2	0.695003	1.24442	5.32217	5.86375	2.90472
Rnf157	8.37063	11.7639	5.31443	0.870118	1.92577
Rgs20	14.2934	4.81017	5.30179	0.519378	0.298809
Aldh1l2	3.33549	9.32636	5.29417	0.803127	1.7087
Ajuba	48.4931	10.8658	5.286	2.71423	2.05894
Xylt1	0.187911	1.64171	5.28346	0.276012	0.110282
Actn3	2.54973	14.4618	5.26463	0.340241	0.868637
Sh2b2	3.11218	3.24711	5.24187	82.7459	106.868
Asgr1	1.35106	1.53224	5.2416	0.095318	0
Maf	0.328692	2.51606	5.19142	3.10156	1.00156
Trf	0.0189045	1.84602	5.1903	2.88613	0.709589
Col23a1	0.0790153	5.19506	5.18215	0.886331	1.17746
Extl1	0	19.3514	5.17989	1.76955	0.292571
Ccdc24	25.4091	6.73728	5.16768	1.65916	1.38229
Mad2l1	9.98205	4.64732	5.1437	1.33764	0.998439
Pbk	6.54903	3.91958	5.14335	0.539203	1.31506
Ifi27l2a	1.17722	7.0663	5.11993	3.40017	1301.97
Cd59a	1.27622	7.42807	5.11958	3.69468	14.0317
Prickle1	0.297434	4.81955	5.09162	2.38517	0.981385
Dusp6	14.9503	7.3681	5.09122	1.24626	3.31002
Bambi	1.03665	5.6409	5.08318	0.633732	0.346872
Plac1	1.08181	6.39778	5.08301	0.664961	0.117173
Vash2	6.44679	8.49411	5.07109	0.590927	0.536834
Rras2	21.1044	3.24619	5.07088	4.24232	6.26192
Shpk	0.766442	2.77733	5.06323	8.94034	11.3194
Mnda	0.761893	0.805188	5.04491	1.66251	0.722362
Tmem229b	0.365252	3.59888	5.03648	6.50263	1.13339
Crim1	10.8006	5.72983	5.01788	0.943867	0.700127
Cidec	0.75449	4.7956	5.00373	1079.08	5678.38
Gpd1	0.566399	3.50825	5.55025	1188.04	6596.7
Cidec	0.75449	4.7956	5.00373	1079.08	5678.38
Plin1	0.0787455	0.565572	0.505834	590.928	748.89
Adipoq	0.169143	1.84484	2.14145	470.348	1580.31
Ephx2	0.163358	1.15812	4.97519	456.887	1537.14
Scarna2	0	0	0	407.307	0
Cyp2f2	0.457316	1.71084	2.20582	336.543	535.353
Lpl	0.23744	0.702535	4.82651	272.991	584.943
Lcn2	0.0619765	0.592356	11.4154	265.293	6.05955
Mgll	4.08956	3.31171	4.08932	258.201	340.315
Scarna10	0	0	0	245.673	0
Rmrp	2.0932	138.597	7.19938	191.756	2.74521
Adig	0	0.220009	0.261891	172.108	774.27
Ppp1r1a	0	0	0.218741	171.463	64.8417
Mrap	0.0551625	0.295447	0.445103	148.658	563.114
Agpat9	1.46133	0.361127	1.11548	134.857	60.8775
Rprl3	2.89414	74.8367	3.73309	125.135	4.19466
Mgst1	0.720758	3.78061	2.78802	124.779	531.616
Ltc4s	0.452704	3.6027	1.95359	90.1705	194.562
Ppp1r1b	0.237874	77.9835	121.34	85.946	4.50759
Agt	0.18215	1.95039	2.97565	84.7828	134.485
Car5b	2.76529	9.85563	4.26432	83.6439	33.1782
Ucp2	0.45588	0.339402	4.42507	83.4191	170.361
Sh2b2	3.11218	3.24711	5.24187	82.7459	106.868
Pla2g16	1.9857	0.672377	0.311519	77.2589	48.5241
Adck3	0.631265	4.03984	3.44962	71.7518	127.044
Fkbp5	8.90376	1.78414	45.6341	70.016	3.00528
Gpt	3.84096	2.05414	1.30955	67.1603	122.977
Aldh1a7	0.135293	0.461656	0.923613	66.6804	43.8152
Rpph1	3.61942	38.3054	1.94068	63.5802	2.42259
Slc5a6	5.29748	4.15068	3.96764	62.4401	30.3594
Fam83a	0.00177779	0.1328	0.47958	60.4634	16.7706
Atp1a2	0.0144362	0.0326726	0.0308497	57.4312	45.8447
Dnajb9	2.64027	4.09692	7.39164	57.2269	41.843
Ppp2r5a	5.17656	4.20265	4.55093	55.2968	133.221
Abhd15	0.134248	0.523161	3.04836	54.7097	50.3825
Slc36a2	0.121059	0.240827	0.22512	50.9205	319.906
Lpin1	1.72132	4.56868	4.49289	49.6093	112.014
Ptplb	1.54371	2.975	3.50988	48.3374	10.591
Cox8b	0.272371	1.16375	0.87808	44.4263	1997.13
Retn	0	0.186825	0.0741295	44.389	461.019
Adh1	0	4.39853	0.688844	44.0824	17.6769
Slc9a3r1	10.8089	3.92367	3.78938	40.8397	11.278
Far2	0.0460935	0.156649	0.20035	38.691	9.61007
Lrig1	10.914	1.38308	3.36734	37.9266	13.7934
Arxes2	0.820983	0.752923	0.558963	37.5546	183.637
Lrp3	0.540667	4.26205	5.6428	35.1497	44.5592
Anxa8	35.016	4.32787	2.31268	34.1421	1.03606
Fmo1	0.102433	0.818598	3.04648	33.827	63.335
Bcar3	2.54474	3.15082	3.21958	33.275	7.5095
4931406C07Rik	1.86817	5.80035	2.55014	32.1606	100.475
Slc25a34	0.261846	14.4173	2.69735	31.8278	77.7623
Rreb1	2.53336	4.1951	3.95546	31.0868	19.8914
1700029I15Rik	2.04446	2.4107	3.03714	30.7138	15.8035
Mc5r	0.136125	0.720831	0.648681	30.445	3.89809
Lrg1	0	0.0614775	0.0885155	30.3744	49.643
Pank3	1.88597	3.17801	5.52541	29.9291	22.7948
Ero1l	4.30713	2.38881	4.56155	29.6068	35.3378
Car3	0.0328084	0.0355416	0	29.0136	21.2879
Nabp1	2.46783	1.94358	2.65412	27.4236	32.7775
A530016L24Rik	1.12349	4.79457	1.03699	27.4232	95.0734
Mapkbp1	4.77445	6.88469	10.3959	27.0781	2.95367
Dusp4	8.31453	2.92112	2.09206	27.0643	24.5544
Sorbs1	3.21688	2.21653	6.26534	27.0217	98.2533
Tapt1	3.07979	4.67521	6.44878	27.0189	31.7686
Hk2	3.55714	2.18057	6.13434	26.8956	35.7702
Gramd1b	1.25147	1.9313	0.323724	25.8972	26.6614
Sort1	0.406182	4.27588	2.08964	25.8065	46.5557
Nr1h3	0.406024	0.929858	0.243557	25.6175	168.406
Tgfbr3	4.6594	4.80835	32.6905	25.3255	9.56412
Aldh6a1	0.648864	4.04835	2.57079	24.5605	59.7585
Map7d2	0	1.07921	1.9871	24.0628	1.06613
Pdhx	4.60991	4.32451	7.45181	23.1896	28.6866
Hsd11b1	0.111224	0.567464	0.632669	23.1164	22.3827
Etfdh	2.4442	4.14243	3.86477	23.0567	55.9616
Crls1	7.27644	3.84995	4.37963	22.6956	49.5331
Cd36	0.0135984	0.0294762	0.049367	22.666	159.564
Usp2	1.65162	5.1445	4.36673	22.4335	14.4064
Mcam	1.64943	0.405793	1.38815	22.0091	22.7859
Bnip3	2.89132	4.4547	3.27202	22.0085	132.187
Hist1h4h	1.85893	2.81844	2.37231	21.5973	133.956
Rilp	0.360063	0.839983	0.932543	21.1893	35.3304
1810011O10Rik	0.457103	2.74103	18.1191	21.0229	7.03631
Egr1	35.7801	10.513	3.72374	20.7627	2.37495
Emc9	1.90952	2.01511	1.04987	20.7545	35.6416
Arl4a	0.38888	0.515128	0.504008	20.575	27.3745
Bcl6	1.8813	3.43708	9.43542	20.398	17.1138
Wfdc21	0	0.189898	0.434422	20.3073	3.08071
Hist1h4i	3.10102	2.31342	2.97414	19.4292	26.2873
Apoo	5.37263	3.81161	2.6936	18.8712	23.9973
Cables1	1.58346	2.87719	5.90221	18.7331	19.6088
Slc2a4	0.0166056	0.501556	0.775795	18.6901	149.243
Arxes1	0.590121	0.459159	0.305843	18.6714	127.004
Emb	3.25822	23.9777	36.2024	18.6491	2.21429
Entpd5	2.42175	4.16918	4.39192	18.3481	36.2377
Ccrn4l	5.71565	1.02354	1.93134	18.2053	25.5863
Itga7	4.28991	0.75552	0.534764	18.1078	26.0404
Rgs2	2.38402	4.87509	22.0998	18.0019	7.39544
Mtus1	0.326804	1.03874	0.399668	17.767	8.45922
Tmem135	2.11844	3.72992	4.79594	17.6726	45.0297
Ppargc1b	0.34323	0.131852	0	17.237	14.6812
Cers4	4.33227	3.91445	1.34745	17.1505	7.86803
Fam214a	0.502996	2.82056	1.96781	16.9972	7.24158
Thrsp	0.100351	0.0564625	0.121942	16.7428	307.678
Fam213a	0.155756	0.141314	0.126161	16.3757	81.6324
Hipk2	2.83815	2.83584	2.80449	16.326	14.9664
Slc27a1	8.1414	4.19957	1.233	16.09	41.8834
Oxnad1	4.27406	2.3498	2.78448	16.0511	28.3967
2010003K11Rik	0	0.02445	0.543023	15.8819	72.4435
Aldh3b2	0.0684101	0.345571	0.117311	15.6196	321.169
Slc16a1	4.04862	1.17301	7.32916	15.5094	17.1389
Ren1	0	0.148083	4.00678	15.1735	0.072553
Fam107a	0	1.79446	13.8412	14.8986	11.0437
Cfd	0.0557505	0.130705	0.408974	14.7763	505.714
Pck1	0	0.0563915	0.0581055	14.7614	72.6971
Pcca	1.81025	3.02807	2.57523	14.2825	22.6765
Cntfr	0.285288	3.64294	4.27379	14.2307	5.79718
Serpina3n	0.034667	6.09189	10.4667	14.191	0.549935
Mfap4	0.896158	21.1459	21.0735	14.0723	2.52784
Spry1	0.771755	3.55123	6.62483	13.9904	3.84549
Hsd11b2	0.227981	0.667769	0.208853	13.6832	1.00383
Dapk1	1.07734	1.85723	1.02973	13.6771	8.01405
Chst15	0.763911	3.69197	1.98835	13.67	10.7688
Smim5	0.236235	5.46467	2.65584	13.5541	3.64377
Enpp2	0.0914318	6.14904	4.54672	13.4976	0.497323
Ctla2a	1.62627	0.374729	4.61096	13.464	1.37313
Slc43a2	0.661954	5.21266	19.7745	13.3206	3.34387
Slc25a33	4.7416	2.29211	3.59165	13.0502	21.5295
Echdc1	0.787475	1.03958	0.567145	12.9884	82.8257
Tmed5	2.53124	2.07608	7.20564	12.9145	21.8055
Rbm38	12.9655	0.561531	3.76706	12.536	9.10092
3110043O21Rik	1.9325	1.83568	2.40747	12.4629	18.142
Tfrc	3.15675	0.480419	1.25287	12.4569	5.78862
Hsdl2	1.14114	2.63319	2.78315	12.3841	50.6011
Abi3	1.75313	1.33159	0.951473	12.3754	129.768
Hsd17b14	0.783493	1.50517	0.416617	12.3219	55.7045
Hist1h4j	3.82344	1.92855	1.8755	12.2884	59.3815
Ermp1	1.87949	2.76931	3.57287	12.1463	25.8501
Ces1f	0.0254075	1.71718	1.38849	12.1117	128.161
Rasd1	1.87038e-12	0.117481	1.81973	12.1069	5.7287
Tspan15	13.346	1.52291	1.09055	11.9143	34.446
Spry4	0.598572	1.70413	2.36796	11.715	8.08765
Cth	1.07218	0.245706	0.712099	11.4993	1.61362
Adamts15	0.0362755	0.208836	3.16294	11.406	4.16444
Aqp7	0.0762874	0.0971335	0.0516835	11.3995	91.7726
Abca1	0.0496214	1.82916	2.67067	11.372	10.5065
Pex13	1.21808	2.27279	2.8229	11.3514	17.7157
Chst8	0	0.426951	1.05944	11.2177	0.544762
Pnpla8	0.65536	2.19112	2.94142	11.0766	15.1114
Nat8l	0.178609	0.120362	0.0997801	11.0762	50.2887
Aspg	0.0343934	0.306279	0.927287	10.9946	11.0564
Gm6568	0.460382	0.664992	1.75408	10.9585	7.87207
Ddi2	4.40516	5.62132	20.7847	10.845	3.05726
Lyrm5	1.22957	3.45154	3.38419	10.7598	19.7678
Hibch	0.973248	1.93918	4.26853	10.7445	17.329
Tspan18	0.0136184	3.73345	1.40206	10.7209	5.39183
Tnfrsf21	2.91649	5.99274	31.4187	10.5458	3.26973
2310001K24Rik	1.34333e-09	2.12552e-08	1.96245	10.4902	3.82233
Rundc3a	3.8257	1.71898	1.79161	10.414	21.0559
Larp1b	3.20353	0.513239	3.60142	10.3441	6.11003
Jade1	2.94703	0.25839	1.49747	10.326	4.89609
Insr	1.37887	2.57295	4.04186	10.3139	9.57259
Trmu	2.17573	3.05097	4.3243	10.157	15.469
Mtfp1	1.4152	2.09124	0.949967	10.0625	23.1352
Rnf125	0.177993	0.861169	0.732792	10.0324	14.2522
Celf2	0.93421	0.57243	1.01748	10.0051	9.1579
Dusp22	2.81383	3.5747	2.75943	9.91206	17.6426
Nudt7	1.18212	2.51439	0.918353	9.90142	40.6463
Igfbp2	0.608945	0.377262	1.4027	9.88589	0.180088
Nnmt	0.334765	0.0941775	0.135597	9.75454	117.832
Snrk	2.54332	4.98783	6.27093	9.64034	45.3661
Prg4	0.1764	0.081352	12.1784	9.63597	62.4221
Sik1	4.87068	8.77703	39.7799	9.62902	2.16973
Hrct1	2.05243	2.97336	0.865131	9.61745	22.1836
Klf15	0.0384963	0.555616	1.00243	9.49858	5.69159
Stradb	5.27187	4.11526	3.6761	9.47664	30.1808
Ccng2	1.13733	6.02555	4.69543	9.33684	16.9678
Map3k6	1.58831	1.041	5.84523	9.11015	1.41016
Plekhf2	1.70959	1.5093	3.4471	9.08652	8.43335
Shpk	0.766442	2.77733	5.06323	8.94034	11.3194
Nampt	1.85563	2.4213	4.8246	8.93007	14.4549
Cars2	10.7803	4.67823	3.44088	8.85528	27.7501
Radil	6.5488	3.30736	1.658	8.85233	25.6633
Sirt3	4.27614	6.49427	4.17396	8.78469	24.4969
Myl6b	4.66656	7.99331	3.99659	8.69253	25.3552
Rtn4ip1	1.40099	2.16277	2.7343	8.53505	13.5266
Pcsk4	1.58309	2.27385	0.774173	8.49079	17.7008
Gadd45a	1.69956	4.0228	2.29883	8.48089	1.50087
Cib2	0.0816995	2.23215	0.909064	8.43938	18.3721
Etv3	0.804552	1.32404	1.7225	8.42464	5.01642
Pim1	3.51057	1.86944	3.11238	8.3951	19.236
Hacl1	0.849639	2.94541	0.54044	8.30281	12.9675
Nipsnap1	4.24036	4.82494	1.42954	8.23264	17.9699
Mc2r	0	0.0484145	0.0199544	8.11529	8.6427
Lenep	2.87858	3.2184	2.22947	8.04734	19.0756
Odf3l1	0.0955406	0.465761	0.180086	7.92748	15.1412
Inca1	0.70163	3.90632	1.87298	7.84194	14.7394
Pet117	0.0465332	0.932356	0.572175	7.81309	3.96088
Tead4	14.348	4.34943	11.3362	7.80157	0.31581
Fgfr2	0.564347	14.1273	13.8996	7.78242	1.57712
Trp53inp1	0.941772	5.52296	9.25918	7.75239	1.51188
Ptk2b	2.99157	2.51258	0.147468	7.6464	22.2334
Chrna2	0.0121064	0	0.0612173	7.58332	23.3298
Cited4	0	0.210898	0.30316	7.58175	0.828693
Scgb1c1	0	0	0.195818	7.5312	0.677877
Acad11	0.729973	3.55507	3.39831	7.43894	23.5368
Rpl26	35.1962	3.25755	2.84551	7.38495	5.60515
Iba57	3.63625	1.59266	2.11469	7.35873	17.3688
Pex3	1.86836	3.42683	3.14286	7.2995	16.5164
Tbkbp1	0.448879	9.44918	3.43582	7.22342	17.7547
Acacb	0.239932	0.751886	0.221866	7.19152	131.84
Hist1h4f	1.12375	1.71088	1.47269	7.125	17.6659
Rprl2	2.5209	4.70033	0	7.11395	0
Ffar2	0	0.0276318	0	6.93874	4.62233
Orm1	0	0.0262719	0	6.87648	42.3572
1810021B22Rik	0.936994	4.90512	3.58342	6.80854	14.5524
Zbtb16	0	0.00959195	1.30542	6.80454	3.10404
Ap1g2	6.9728	3.06833	1.18945	6.78458	21.5666
2610020H08Rik	0.201053	0.578722	0.772956	6.62957	1.46039
4632428N05Rik	0.241483	0.333213	0.10804	6.61329	13.291
Hcar1	0.0412778	0.229235	0.0569277	6.57829	12.1866
Txlng	0.551574	0.556045	2.07349	6.56334	4.30341
Cmbl	0	0.218747	0.121505	6.55112	118.189
Tmem229b	0.365252	3.59888	5.03648	6.50263	1.13339
Edil3	0.946311	6.99634	4.76846	6.49308	0.802579
Ces1d	0.022831	0.577541	0.582912	6.43488	271.015
Kirrel	0	32.9588	0	6.42202	4.92291
Ccl9	1.5252	2.04322	1.26459	6.41327	0.977367
Aspn	2.23607	45.9775	20.3362	6.35958	2.77729
Atp2b4	0.153486	0.566445	0.511474	6.33999	2.46039
Hpx	0.301528	0.446879	0.145605	6.29006	0.867463
Ppp3ca	2.16875	7.71402	25.7358	6.23203	2.76451
Mut	1.02349	2.25563	1.53926	6.17477	13.9391
Acss2	2.95651	10.0618	3.84202	6.1744	45.5073
Pde4d	1.89905	5.87127	16.745	6.17129	4.88314
Pdss1	1.6357	0.38186	0.449842	6.13431	1.86363
Gm15417	1.34926	1.38106	1.71464	6.11419	7.9009
Adarb1	1.7932	2.75475	28.6858	5.99346	2.89024
Mcur1	1.0552	1.0825	1.29085	5.98705	35.1925
Clpx	1.53487	1.75402	2.12315	5.95235	10.0846
Pde3b	0.192926	0.198179	1.71859	5.94405	24.3547
Fam132a	1.20062	1.58776	0.838094	5.93794	83.3521
Osgin2	0.909141	11.4194	5.52065	5.93471	2.33498
Rarres2	7.50225e-09	2.70251	3.34843	5.93121	488.283
Kitl	1.68342	6.28566	15.6571	5.9205	1.36019
Rarres1	0.0360154	1.16816	1.08081	5.91953	0.362125
Ssh2	0.695003	1.24442	5.32217	5.86375	2.90472
Igf1	0.336732	26.8486	19.4979	5.80842	2.6494
Scd4	1.24646	3.71241	4.8234	5.78577	26.0646
Lactb2	2.38363	2.59644	2.41399	5.7617	15.4189
Ppip5k1	2.50129	1.39918	1.23794	5.74289	21.9296
Col11a1	1.48533	72.7287	39.1491	5.71131	1.20648
Lect1	0	12.3775	4.70562	5.67365	0.107674
Crip2	21.309	10.7587	3.43676	5.66951	3.76554
Gm11974	9.34899	2.77813	2.76198	5.57081	0.415575
Ifi204	2.03442	2.28832	15.3553	5.52783	2.65868
Sgcd	2.7462	5.32336	2.3301	5.51309	16.0191
Tgoln1	2.08385	3.02705	6.29884	5.49571	15.2554
Gbe1	0.892651	0.58072	0.802608	5.47893	33.8653
Pex11a	0.376758	0.651011	0.508919	5.46553	19.4029
Mars2	1.99092	0.551871	1.16304	5.33708	2.44269
Ptgr2	0.429876	1.29452	0.691784	5.31107	9.63663
Atp2a3	0.0183059	0.11453	0.0129856	5.31076	2.86717
Slc16a10	0.486348	0.86011	0.355036	5.29221	3.27431
Lipt1	2.97086	1.68646	1.31061	5.26753	12.7348
Slc23a2	3.17434	4.59898	30.7007	5.2675	3.46753
Igf2	0.226548	3.24304	2.26099	5.23534	0.837115
42432	0.457951	1.72461	5.50312	5.22939	2.37713
Sowahc	0.41993	0.774781	0.724121	5.22408	3.91589
Hpdl	0.853038	0.929904	0.805425	5.18909	11.7929
Adrb2	0.546416	0.64599	0.293977	5.14604	2.43691
Cytl1	0.856888	89.7309	76.7681	5.14005	0.229688
Ccbl2	1.63826	1.26558	0.972044	5.10654	5.92647
Hist1h4c	1.58532	1.7738	1.57631	5.0774	19.1767
Dcun1d3	0.907856	0.854754	1.79426	5.07125	5.02868
Bmf	0.559505	9.63639	8.15756	5.04719	0.712149
Ralgapa2	0.310644	1.61948	1.07314	5.03117	6.53421
Sox12	4.54317	17.2944	6.95306	5.00917	2.36306
Rps6ka1	1.34525	4.05565	1.6443	5.00121	10.5683
Gpd1	0.566399	3.50825	5.55025	1188.04	6596.7
Cidec	0.75449	4.7956	5.00373	1079.08	5678.38
Cox8b	0.272371	1.16375	0.87808	44.4263	1997.13
Adipoq	0.169143	1.84484	2.14145	470.348	1580.31
Ephx2	0.163358	1.15812	4.97519	456.887	1537.14
Ifi27l2a	1.17722	7.0663	5.11993	3.40017	1301.97
Cidea	0	0.528606	0.310307	3.80271	877.488
Adig	0	0.220009	0.261891	172.108	774.27
Plin1	0.0787455	0.565572	0.505834	590.928	748.89
Lpl	0.23744	0.702535	4.82651	272.991	584.943
Mrap	0.0551625	0.295447	0.445103	148.658	563.114
Cyp2f2	0.457316	1.71084	2.20582	336.543	535.353
Mgst1	0.720758	3.78061	2.78802	124.779	531.616
Cfd	0.0557505	0.130705	0.408974	14.7763	505.714
Rarres2	7.50225e-09	2.70251	3.34843	5.93121	488.283
Retn	0	0.186825	0.0741295	44.389	461.019
Mgll	4.08956	3.31171	4.08932	258.201	340.315
Cox7a1	1.29728	0.563232	0.79814	1.04597	328.628
Aldh3b2	0.0684101	0.345571	0.117311	15.6196	321.169
Slc36a2	0.121059	0.240827	0.22512	50.9205	319.906
Elovl3	0.0240167	0.154636	0.150606	3.00248	314.175
Cpt1b	0.118342	0.452973	0.000411462	0.863648	310.962
Thrsp	0.100351	0.0564625	0.121942	16.7428	307.678
Ces1d	0.022831	0.577541	0.582912	6.43488	271.015
Cyp2e1	0.0185457	0.0153699	0.0322791	0.695586	216.303
Scarna17	979.691	0	443.162	0	200.559
Ltc4s	0.452704	3.6027	1.95359	90.1705	194.562
Arxes2	0.820983	0.752923	0.558963	37.5546	183.637
Ffar4	0	0.0198032	0.0942925	3.95145	171.583
Ucp2	0.45588	0.339402	4.42507	83.4191	170.361
Nr1h3	0.406024	0.929858	0.243557	25.6175	168.406
Cd36	0.0135984	0.0294762	0.049367	22.666	159.564
Slc2a4	0.0166056	0.501556	0.775795	18.6901	149.243
Steap4	0.0148071	0.197817	0.076377	2.16903	136.883
Agt	0.18215	1.95039	2.97565	84.7828	134.485
Hist1h4h	1.85893	2.81844	2.37231	21.5973	133.956
Ppp2r5a	5.17656	4.20265	4.55093	55.2968	133.221
Bnip3	2.89132	4.4547	3.27202	22.0085	132.187
Acacb	0.239932	0.751886	0.221866	7.19152	131.84
Abi3	1.75313	1.33159	0.951473	12.3754	129.768
Ces1f	0.0254075	1.71718	1.38849	12.1117	128.161
Adck3	0.631265	4.03984	3.44962	71.7518	127.044
Arxes1	0.590121	0.459159	0.305843	18.6714	127.004
Gpt	3.84096	2.05414	1.30955	67.1603	122.977
Cmbl	0	0.218747	0.121505	6.55112	118.189
Nnmt	0.334765	0.0941775	0.135597	9.75454	117.832
Tusc5	0.0430007	0.093166	0.0646925	3.48032	112.639
Lpin1	1.72132	4.56868	4.49289	49.6093	112.014
Clstn3	0.125747	0.45262	0.0783401	3.81286	108.969
Sh2b2	3.11218	3.24711	5.24187	82.7459	106.868
4931406C07Rik	1.86817	5.80035	2.55014	32.1606	100.475
Sorbs1	3.21688	2.21653	6.26534	27.0217	98.2533
A530016L24Rik	1.12349	4.79457	1.03699	27.4232	95.0734
Aqp7	0.0762874	0.0971335	0.0516835	11.3995	91.7726
Apoc4	0	0.999154	0.23456	1.33668	87.6577
Fam132a	1.20062	1.58776	0.838094	5.93794	83.3521
Echdc1	0.787475	1.03958	0.567145	12.9884	82.8257
Fabp3	0.656864	1.26262	1.34332	0.65255	81.8898
Fam213a	0.155756	0.141314	0.126161	16.3757	81.6324
Slc25a34	0.261846	14.4173	2.69735	31.8278	77.7623
Selenbp1	0.64138	4.67802	1.25723	3.8	75.6544
Fah	9.79212	5.7044	1.76008	2.93545	75.3923
Pck1	0	0.0563915	0.0581055	14.7614	72.6971
2010003K11Rik	0	0.02445	0.543023	15.8819	72.4435
Mb	0.17068	0.0308148	0.0366809	0.826979	70.5987
Chchd10	0.391529	1.13194	0.198041	2.4529	69.1094
Ppp1r1a	0	0	0.218741	171.463	64.8417
Fmo1	0.102433	0.818598	3.04648	33.827	63.335
Prg4	0.1764	0.081352	12.1784	9.63597	62.4221
Agpat9	1.46133	0.361127	1.11548	134.857	60.8775
Kcnk3	0	0.00712385	0.0246155	2.69206	60.6485
Aldh6a1	0.648864	4.04835	2.57079	24.5605	59.7585
Hist1h4j	3.82344	1.92855	1.8755	12.2884	59.3815
Apoc1	0	1.68544	2.26083	1.39971	56.3383
Etfdh	2.4442	4.14243	3.86477	23.0567	55.9616
Hsd17b14	0.783493	1.50517	0.416617	12.3219	55.7045
Hsdl2	1.14114	2.63319	2.78315	12.3841	50.6011
Abhd15	0.134248	0.523161	3.04836	54.7097	50.3825
Nat8l	0.178609	0.120362	0.0997801	11.0762	50.2887
Lrg1	0	0.0614775	0.0885155	30.3744	49.643
Crls1	7.27644	3.84995	4.37963	22.6956	49.5331
Pla2g16	1.9857	0.672377	0.311519	77.2589	48.5241
Ehhadh	0.104983	0.124939	0.0762056	0.763161	48.4319
1700055N04Rik	0.0391594	0.308231	0.0888595	2.44859	48.4132
Tmem182	0	0	0	0	47.828
Sort1	0.406182	4.27588	2.08964	25.8065	46.5557
Atp1a2	0.0144362	0.0326726	0.0308497	57.4312	45.8447
Acss2	2.95651	10.0618	3.84202	6.1744	45.5073
Snrk	2.54332	4.98783	6.27093	9.64034	45.3661
Tmem135	2.11844	3.72992	4.79594	17.6726	45.0297
Lrp3	0.540667	4.26205	5.6428	35.1497	44.5592
Jak3	4.0226	3.84918	2.20816	4.3696	44.0969
Aldh1a7	0.135293	0.461656	0.923613	66.6804	43.8152
Ucp1	0	0.047226	0.0389292	0	43.3892
Krt36	0	0.257868	0.189659	0.570156	42.8184
Orm1	0	0.0262719	0	6.87648	42.3572
Slc27a1	8.1414	4.19957	1.233	16.09	41.8834
Dnajb9	2.64027	4.09692	7.39164	57.2269	41.843
Acy3	0.817729	2.55708	0.148628	1.78958	41.0937
Nudt7	1.18212	2.51439	0.918353	9.90142	40.6463
Selenbp2	0.435164	2.29743	0.540877	1.94479	40.254
Entpd5	2.42175	4.16918	4.39192	18.3481	36.2377
Hk2	3.55714	2.18057	6.13434	26.8956	35.7702
Emc9	1.90952	2.01511	1.04987	20.7545	35.6416
Ero1l	4.30713	2.38881	4.56155	29.6068	35.3378
Rilp	0.360063	0.839983	0.932543	21.1893	35.3304
Mcur1	1.0552	1.0825	1.29085	5.98705	35.1925
Acer2	0.130962	0.0121867	0.0981602	1.26672	34.9696
Tspan15	13.346	1.52291	1.09055	11.9143	34.446
Gbe1	0.892651	0.58072	0.802608	5.47893	33.8653
Car5b	2.76529	9.85563	4.26432	83.6439	33.1782
Nabp1	2.46783	1.94358	2.65412	27.4236	32.7775
Apol6	0.0263517	0.332522	0.0470889	2.59433	32.6489
Tapt1	3.07979	4.67521	6.44878	27.0189	31.7686
Slc5a6	5.29748	4.15068	3.96764	62.4401	30.3594
Stradb	5.27187	4.11526	3.6761	9.47664	30.1808
Lipg	0.740321	1.5293	1.0935	0.744807	29.2716
Dusp3	14.4226	2.60564	1.6829	1.30135	29.0223
Pdhx	4.60991	4.32451	7.45181	23.1896	28.6866
Oxnad1	4.27406	2.3498	2.78448	16.0511	28.3967
Cars2	10.7803	4.67823	3.44088	8.85528	27.7501
Arl4a	0.38888	0.515128	0.504008	20.575	27.3745
Pfkfb1	1.68063	1.07873	0.605726	3.21347	27.3268
Clec3b	1.68122	13.9563	15.1824	4.42014	27.3106
Gys2	0	0.0191989	0.0342807	2.54074	27.1902
Gramd1b	1.25147	1.9313	0.323724	25.8972	26.6614
Hist1h4i	3.10102	2.31342	2.97414	19.4292	26.2873
H2-K1	6.43884	4.79448	4.33376	2.06512	26.2714
Scd4	1.24646	3.71241	4.8234	5.78577	26.0646
Itga7	4.28991	0.75552	0.534764	18.1078	26.0404
Ermp1	1.87949	2.76931	3.57287	12.1463	25.8501
Adrb3	0	0.0181765	0.0216366	2.10672	25.7004
Radil	6.5488	3.30736	1.658	8.85233	25.6633
Ccrn4l	5.71565	1.02354	1.93134	18.2053	25.5863
Myl6b	4.66656	7.99331	3.99659	8.69253	25.3552
Acp5	0	0.0409851	0.073176	1.00284	24.991
Apoc3	0	0	0	0	24.9006
Htra3	0.338406	0.782659	0.228248	3.35214	24.59
Dusp4	8.31453	2.92112	2.09206	27.0643	24.5544
Sirt3	4.27614	6.49427	4.17396	8.78469	24.4969
Krt79	0	0	0.014807	1.61726	24.4066
Pde3b	0.192926	0.198179	1.71859	5.94405	24.3547
Apoo	5.37263	3.81161	2.6936	18.8712	23.9973
Acad11	0.729973	3.55507	3.39831	7.43894	23.5368
Chrna2	0.0121064	0	0.0612173	7.58332	23.3298
Mtfp1	1.4152	2.09124	0.949967	10.0625	23.1352
Tpsab1	0.0488922	0.050003	0.0630505	0.702559	22.9258
Pank3	1.88597	3.17801	5.52541	29.9291	22.7948
Mcam	1.64943	0.405793	1.38815	22.0091	22.7859
Oplah	1.44762	3.05714	1.59312	3.17684	22.7631
Pcca	1.81025	3.02807	2.57523	14.2825	22.6765
Fgf21	0	0	0.0377205	2.44294	22.4729
Fam57b	0.280202	0.224456	0.173988	2.29814	22.4355
[truncated: 278 more rows]

## Sheet: WA stage specific genes
Gene	WA d-4	WA d0	WA 6h	WA d2	WA d7
Tagln	267.097	11.5087	18.255	2.07988	3.5748
U90926	211.385	0.453118	2.61893	0	0.0961315
Ccl2	208.37	27.4838	9.90742	4.53472	2.53956
Actg2	122.761	19.227	20.606	1.00395	1.59642
Grem1	106.023	21.4757	11.1004	4.94221	1.6196
Lce1g	96.9931	0.567793	1.37568	1.45289	0.0899059
Il1rl1	87.0979	3.01361	40.0485	0.738359	0.194764
Fhl1	86.8754	5.29448	2.76337	3.45978	17.5712
Plaur	73.5953	4.20809	21.8059	2.82117	1.28271
Tes	64.0395	15.6643	20.8919	4.12124	1.44846
Ngf	60.1944	10.8973	4.19848	2.15544	1.02469
Ankrd1	57.0332	1.44051	0.0640451	0.0213301	0.039181
3300005D01Rik	50.1171	15.2515	8.04969	2.87159	4.84196
Steap1	48.2585	6.77952	27.8242	3.78349	2.47777
Serpinb9b	47.4951	2.2896	2.69499	0.878259	1.21438
Tnnt2	46.7971	0.573345	1.436	0.147151	0.0337854
Hmga2-ps1	41.3887	3.13077	14.506	1.72088	0.63221
Prl2c4	40.8965	1.77035	0.0403191	2.61986	0.00158296
Tnc	40.848	15.9372	27.684	3.66981	1.76508
Slc38a4	40.4567	17.8487	13.9189	4.1712	1.96062
Gprc5a	39.9429	2.76401	43.5531	2.24714	0.0982793
Ptgs2	37.5351	1.18511	2.03799	0.5154	0.240562
Dbf4	35.0115	7.80985	4.6423	6.80224	3.67253
Pdpn	34.8331	28.9522	46.6958	3.21891	2.81735
Grem2	34.6585	3.05318	12.141	10.4192	3.82603
Bdnf	34.6465	6.04643	12.1002	4.14125	0.905585
Pak1	33.8094	13.0981	10.7199	2.61067	2.78311
Specc1	33.648	5.78553	1.80018	1.8112	2.01861
Rasa4	33.4677	16.9831	7.48639	2.93827	2.95622
Fam64a	32.8394	5.80215	2.08606	4.66983	3.24702
Klf5	32.7826	3.3169	61.7636	45.9055	2.45289
Bcat1	32.5206	6.52537	21.6183	2.11601	0.675802
Fblim1	32.4991	10.7103	2.86123	1.90474	1.88006
Loxl4	32.1946	6.00313	4.46682	1.55974	1.10506
Parvb	32.0591	6.90902	9.41442	1.75003	1.97418
Chaf1b	31.7693	7.13553	2.67146	7.89065	3.48935
Gtse1	30.8456	6.94176	4.97774	7.15673	3.04643
Flrt2	30.7619	8.3192	10.8713	2.29946	1.61944
Renbp	30.6588	29.7747	9.35613	3.94955	4.12651
Ajuba	30.5338	9.26904	7.03267	2.96829	1.30855
Aif1l	30.0418	2.10796	0.84861	0.339154	0.789859
Plekho1	30.0057	10.5668	4.85129	3.66421	1.08646
Dlx2	28.9611	3.53221	26.2758	3.05237	0.350429
Epha2	27.9951	4.82179	7.72376	1.28619	0.401968
Itprip	27.8548	7.41393	10.1233	2.05659	1.03029
Elk3	27.758	15.4596	4.15963	5.08975	3.93095
Klhdc8a	27.6322	2.26954	5.2634	0.229361	0.173038
Rpl26	27.1088	5.58715	3.17935	3.21764	10.2273
Nkain1	27.0867	9.04914	7.21019	1.94282	1.41968
Lce1h	26.9993	0.143541	0.0331856	0.331573	0.0304531
Kif23	26.9624	4.98551	2.49353	4.26949	1.766
Dusp5	26.8056	8.66931	12.1938	4.2712	3.69777
2200002D01Rik	26.7983	3.23367	2.08888	0.549236	0.504441
Etv4	26.7134	1.47392	0.890976	0.171796	0.129097
Mustn1	26.041	3.96187	1.74305	1.67326	6.61763
Crim1	25.7248	5.61927	4.86841	2.55835	3.63239
Gpr149	25.4868	13.7154	3.19218	8.42015	2.22629
Cep55	25.4429	3.43804	3.60295	4.09679	5.80547
Aurkb	25.1197	4.29227	2.52838	8.26244	4.44848
Frmd4a	24.8742	7.29144	6.53646	2.58541	2.45613
Ctgf	24.6708	0.445951	5.67052	0	0
Trip13	24.6165	3.7731	2.39078	6.26237	3.75042
Nuf2	24.5701	4.2897	2.25603	7.89694	4.39295
Ptprn	24.5065	4.72567	16.7182	3.77864	0.973197
Hbegf	24.4753	1.12874	3.94505	0.398769	0.281728
Rin1	23.2759	6.63555	15.7309	4.68414	1.76474
Cck	23.0969	0.355105	0.410487	0.205068	0
Smc2	22.5379	5.48437	4.46147	6.65808	4.2281
Cenph	22.3254	5.65405	2.28594	8.94295	4.90451
Serpinb2	22.0169	0.0978205	0.0372974	0	0.0172791
Zfp57	21.9469	17.8242	10.9165	2.03913	2.33846
Cd109	21.6798	11.7298	17.5433	2.91061	1.30151
Myo1e	21.4725	12.2327	12.8714	4.40594	1.29745
Fam83d	21.0367	5.06195	4.06844	7.15823	4.09042
Atad2	20.8573	5.67148	2.73097	6.10787	4.15096
Nrg1	20.631	14.6954	6.72122	4.0328	2.75376
Shcbp1	20.6301	3.81298	2.18655	7.32256	3.94956
Dnph1	20.5853	4.44226	5.7631	4.98304	1.72895
Rad51ap1	20.3743	4.2598	2.49273	6.98185	4.57495
Ereg	20.2581	2.61027	12.6585	0.96541	0.458893
Diap3	20.0058	3.42966	1.21754	2.58381	1.37583
Gadd45b	19.4152	5.42889	12.8336	2.94701	1.03659
Pkp2	19.4075	1.52357	0.434095	0.446116	5.25823
Gm12603	19.2921	0.728993	0.777865	0.0647668	0
Dlgap5	19.2076	4.38031	1.58354	5.4856	3.23715
Maff	19.1767	1.80631	18.8444	1.0014	8.75654
Pawr	19.1189	14.3434	1.64162	2.00927	3.16354
Steap2	19.1097	6.50463	10.0583	4.31071	1.27649
C330027C09Rik	18.9226	5.12367	2.96138	6.20034	4.34806
Smad7	18.9045	3.42943	8.79379	0.903777	1.27036
Pml	18.7495	15.7943	4.0982	5.57272	3.59707
Arhgap11a	18.6431	4.05016	2.94346	4.76087	3.76881
Ncapg	18.634	3.60295	1.85955	5.4989	3.62329
Pbk	18.601	3.59856	3.69759	9.81334	4.72917
Pcgf5	18.5948	10.8023	2.45144	2.52588	22.4372
Pop1	18.5872	3.99098	9.05478	11.0294	1.89473
Troap	18.378	3.53509	2.69566	6.72629	2.69924
Mtmr10	18.2588	4.39289	4.03175	3.2293	3.70588
Rad51	18.2399	3.98749	1.60251	5.10473	2.71184
Kif2c	18.219	3.18927	2.15109	6.28926	2.78335
Epb4.1l4a	18.0415	6.23376	7.8453	1.30491	0.561529
Timp3	17.7312	12.6282	23.1434	1.24209	0.860712
Lrrc8c	17.5677	6.06248	21.2144	2.76529	2.01549
Tmem173	17.5651	12.4817	3.81317	4.13048	2.16892
Dusp4	17.448	1.25796	4.21256	3.90939	32.0674
Ect2	17.415	2.53936	1.23679	3.34548	1.73194
Mybl2	17.3198	1.9286	1.09088	3.10801	1.28519
Pold1	17.2749	5.2288	3.29124	7.38345	2.64983
Ndc80	17.2122	4.20817	1.57699	3.68485	2.03672
Ccne2	17.1674	1.97347	4.19125	6.79775	7.73999
Gm10052	17.0852	1.06201	0.00026165	6.8815	5.56527e-09
Ccl9	16.8078	5.33978	1.64673	0.384494	2.30678
Rrp12	16.8075	3.0014	17.7807	7.68411	2.32935
Dusp14	16.807	2.39651	26.6807	12.0391	1.87577
Kif11	16.756	3.74202	2.03709	5.85217	2.88265
Prr11	16.694	3.46989	2.0076	4.3859	3.14821
Ccrn4l	16.691	1.94212	4.78083	8.92589	47.629
2810025M15Rik	16.3197	6.75473	2.96719	5.86967	2.59634
Trim16	16.2943	6.76244	9.36068	1.13639	1.32535
Lrrk1	16.1774	10.3234	3.75103	2.90732	2.05433
Chtf18	16.0318	2.90394	2.07127	4.76174	2.13927
Dhrs9	15.8353	3.88368	3.36704	1.47819	19.8379
Kifc1	15.7931	4.28085	2.52276	6.43252	3.37629
Irak2	15.7295	6.66984	1.73933	3.55191	7.42411
Chac1	15.5304	17.0858	2.24604	3.17104	16.0183
Slco3a1	15.4473	4.09951	27.2235	11.1649	0.646994
Arhgap22	15.4401	4.27506	1.83752	1.09879	1.45627
Fbxo5	15.436	3.65979	1.77747	3.38573	2.61359
Abcb1b	15.3462	2.92133	4.06253	1.03353	0.405058
Spdl1	15.342	2.83794	1.70531	4.54842	2.94412
Col8a1	15.2811	4.66012	1.4544	0.203619	0.880515
Schip1	15.2747	4.35038	6.41269	0.767428	0.346015
Cxcl5	15.2141	10.1489	4.17705	1.53639	0.947745
Kif20b	15.0929	3.24942	1.99626	3.03843	1.82047
Hmmr	14.898	2.63093	2.18026	6.45952	4.07755
Tuba4a	14.8869	2.77439	5.73577	1.41392	2.05626
Cenpi	14.738	3.05534	1.44897	4.98788	3.32414
Kif4	14.6731	2.4974	2.01084	4.25093	1.83848
Bub1	14.5787	3.11114	1.60569	5.24871	3.35405
Kif18b	14.5172	2.78911	1.44712	3.90176	1.67948
Npnt	14.2501	0.892873	0.991744	0.725041	5.9047
Rnd1	14.1974	1.00504	2.33603	0.716244	5.51538
Siglecg	14.1865	0.366691	0.116932	0.0438123	0
Arl4c	14.1338	3.93139	17.2657	3.61128	0.536534
Slc25a13	14.0311	4.5296	2.88092	2.36212	2.7591
Sgol1	14.024	2.95498	1.69324	4.03879	2.20947
Pcdh18	14.0073	28.2061	2.86004	2.56245	3.75815
Gins1	13.8944	3.10139	1.3963	4.52467	4.53658
Foxp1	13.8198	3.04508	26.1983	8.05623	2.14969
Rgs16	13.7548	7.35954	0.969586	0.57813	2.97061
Trib3	13.7476	31.264	4.14987	3.24495	54.9535
Rnaseh2b	13.7088	6.90216	2.10104	3.45445	3.19712
AU021092	13.6851	5.45457	3.50927	1.88141	1.09962
Wdhd1	13.6766	2.14956	2.77862	5.56927	2.10303
Ccbe1	13.6265	4.91442	1.99192	1.85794	0.77313
Fignl1	13.626	3.13309	1.94402	5.61698	3.25441
Gmnn	13.5788	1.93913	1.07767	3.96245	3.52061
Tyms	13.495	3.12877	3.24291	5.63759	2.59396
Atp10a	13.4946	4.12881	8.05164	2.78278	1.42313
Melk	13.3568	3.21276	1.09447	3.30519	1.6363
Pla2g7	13.1835	12.738	6.58321	1.30384	0.536196
Hs6st2	13.1677	6.52738	3.60301	1.23983	1.27167
Ptpn21	13.1618	6.4679	1.41817	2.26837	3.19586
Hoxc13	13.0737	2.66436	2.40711	0.702096	0.631115
Cenpe	12.9728	2.73568	1.79141	3.67604	2.11818
Dhfr	12.9103	2.49554	1.6009	5.23268	3.06951
Mcm10	12.867	1.7964	1.31685	4.29129	1.57094
Hspa4l	12.8654	2.49276	1.21223	1.40975	3.01811
Prl2c1	12.8647	0.512882	1.22033	2.4287	1.07451
Cdca5	12.796	2.57461	1.74261	4.53867	2.8389
Procr	12.6627	7.60619	10.1767	2.27948	1.41139
Fam198b	12.5202	6.61091	2.93041	1.88881	2.55634
Fez1	12.4848	4.13345	1.78794	1.04721	0.282882
Plau	12.4446	3.70644	1.76054	0.358034	0.30024
Ttk	12.3333	2.00741	1.20961	3.68741	2.12942
Sprr2k	12.1414	0.198771	3.06362	0.0765252	0
Scrn1	12.1336	21.4978	2.37278	3.23862	3.09113
Pola1	12.0618	3.67178	1.45801	3.76817	1.83449
Gsto2	11.9639	4.23873	0.600704	0.568596	1.38876
Wwc1	11.9639	2.34458	2.94591	1.09173	0.491517
Gm6793	11.9557	5.03353e-164	4.65379e-111	3.65027e-131	3.30284e-132
Dynap	11.9266	0.366329	0.553758	0.0325462	0
Pkmyt1	11.8974	4.08203	1.2734	6.2057	14.4932
Pole2	11.8941	3.88634	1.83274	4.30997	2.76887
Peg12	11.7949	2.57999	4.1589	1.74962	0.200866
Id4	11.7271	4.69181	32.361	6.5396	4.03248
Plk4	11.6838	2.88123	1.29771	3.23582	2.6369
Fam60a	11.6576	1.70561	4.77845	1.68266	0.420908
Cdca2	11.5937	2.47642	1.74541	4.78354	2.74596
Fam131b	11.5446	6.87006	2.97373	0.766159	0.373914
Pim1	11.4855	1.71222	8.21825	1.26823	2.15191
Apol10b	11.3211	3.24906	0.497135	0.242905	0.211654
Nek2	11.2626	2.35032	1.21369	3.59345	3.40255
Tead4	11.2336	2.39543	43.0122	14.4145	1.96837
Sgcd	11.0943	9.72186	3.79251	3.48278	30.2728
Samd4	11.0319	6.16089	2.40617	1.01805	3.51893
Pvrl1	10.9755	1.9529	12.2137	2.82457	0.44706
Cgref1	10.9408	1.34923	4.14812	0.0957628	0.381139
Gas2	10.9143	38.076	3.84457	2.98002	6.18587
E2f7	10.784	1.0281	0.670079	0.97268	0.806336
Gpr176	10.7116	2.48871	0.458499	0.0089825	0.0577493
Styk1	10.7116	1.1354	0.755985	1.07006	0.404679
Nuak2	10.5984	2.39256	7.1151	1.1122	0.273794
Ly75	10.4422	1.99631	3.43466	1.05901	1.69904
Ska3	10.4031	2.21776	1.43236	3.63058	1.99315
Cd24a	10.3918	3.58571	42.1729	11.4018	1.41332
Ercc6l	10.3516	2.17274	1.31004	3.5099	2.03679
Espl1	10.3379	1.51197	1.13061	2.91221	1.21361
Masp1	10.3	5.58943	11.6144	2.40453	0.828159
Msln	10.1304	1.91591	2.77275	3.60673	0.848147
Fancb	9.85852	1.18561	1.40477	1.76652	1.64467
Kif18a	9.79214	2.35087	1.18496	1.647	1.31453
Sgol2	9.74414	2.36193	1.00448	3.63462	2.85562
4930503L19Rik	9.68439	5.70508	2.34732	1.89859	1.83167
Ctla2b	9.67523	3.19374	34.1927	18.5749	1.03905
Krt80	9.63859	0.532504	1.37969	0.0848315	0.194782
Itga3	9.60802	2.25732	3.78502	0.959773	0.243398
Tmcc3	9.59672	1.38452	0.53987	12.9644	18.5518
Pole	9.58312	2.34393	1.24165	2.98847	1.98734
Fgd3	9.55895	0.446436	0.172021	0.0343748	0.0105238
Depdc1a	9.5549	1.97629	1.24542	2.46912	2.49176
Ccdc109b	9.51457	2.14784	0.455425	2.68888	0.631363
Clspn	9.5127	1.39084	1.19971	3.36608	1.52657
Acsl3	9.48558	7.18765	4.87222	3.67013	24.5997
Eif3j1	9.48137	0.051919	0.0517317	19.2973	0.0496527
Podnl1	9.35645	2.91979	0.319752	0.390475	0.635751
Ampd3	9.33967	3.42304	1.95282	3.10571	1.04534
Ddias	9.13808	2.62091	2.1978	2.83212	1.59273
Rassf7	9.0816	4.40824	1.63972	1.48709	2.15289
Slc16a13	8.99016	2.33216	4.60309	1.57604	1.68436
Irgm1	8.9883	24.4448	2.20907	3.19309	2.56987
Cdkn3	8.92348	3.90062	0.468464	3.21794	2.47186
Cplx2	8.92025	11.9915	3.56307	2.30641	1.8851
Ndrg4	8.87833	10.1988	2.34083	1.50408	1.28716
Dlk2	8.8348	0.309463	15.6693	0.0824797	0.0252493
Fhdc1	8.71743	1.12938	0.774098	0.529194	0.395236
Tll1	8.69789	0.210552	6.11651	0.895194	0.0388433
Dzip1l	8.68579	3.91731	1.49451	1.4664	1.41251
Nexn	8.65084	3.36548	0.162393	0.0987634	0.563689
Spc24	8.62457	2.33847	1.2042	4.81409	1.99248
Mms22l	8.60708	1.5562	1.03242	2.30533	1.52877
Dfna5	8.51633	2.57056	1.08839	2.12313	3.74142
Fas	8.50713	20.3465	1.87156	6.10334	4.15051
Npy1r	8.47516	8.12191	1.36827	1.12291	0.1884
Pxylp1	8.47458	3.21845	1.00584	0.411677	0.678361
5730416F02Rik	8.46332	4.05345	2.46612	2.05334	0.754352
Nav2	8.45373	1.34837	4.16403	0.267146	0.155001
Tmem171	8.42154	0.151561	0	0	0
Zfp367	8.41209	2.36887	1.00405	2.17865	2.12196
E2f8	8.37685	1.67425	1.62475	3.95337	1.23662
Rgs4	8.36838	1.31667	0.961916	0.462299	0.0893883
Mis18bp1	8.36686	2.02636	1.19742	2.49758	1.61213
Dscc1	8.29666	2.60883	0.241256	1.14499	1.32835
Gnb4	8.09602	3.07879	1.11217	0.653662	0.36021
Acsbg1	8.02045	0.740085	0.427755	2.39597	0.499587
Vash2	7.84046	6.51675	1.46193	1.09068	1.04276
Nr1d2	7.83726	6.81764	0.924074	1.5238	8.44537
Cdc25c	7.75468	2.71877	1.20729	2.96779	1.24857
Pkia	7.73213	3.93741	0.421612	1.12972	1.1431
BC055324	7.72118	2.02601	0.738204	2.2341	1.78358
Prelid2	7.66713	6.70697	1.92223	3.71314	23.2842
Upp1	7.60308	0.658284	1.61548	0.158317	0.378073
Gm24148	7.52738	6.36705	22.0802	0	3.37701
Dlx1	7.49092	2.88368	7.4607	1.11537	0.459017
Arxes2	7.46178	3.46327	2.83107	21.8566	107.191
Tdrkh	7.42703	2.93482	0.544986	1.07543	3.76334
Gm12238	7.36379	0	0	7.19396	6.60724
Thbs3	7.24239	20.8748	13.2548	4.99635	2.47408
Ada	7.20272	2.25303	4.33817	1.71263	0.674011
Eme1	7.18335	1.62705	0.843999	2.50262	1.24378
Slpi	7.15035	4.54682	9.61938	3.81474	0.27301
Myo1d	7.06316	5.25769	21.6958	3.03948	2.75595
Pik3cb	6.99281	0.942413	0.734624	1.0276	2.26903
Clhc1	6.87373	0.784236	0.375122	1.53044	1.52037
Neil3	6.78668	1.99793	0.520457	1.56004	1.20893
Mfap3l	6.78407	1.18288	3.45155	0.894667	0.597083
Il18rap	6.72959	0.301535	0.391244	0.163471	0.0130556
Cdc6	6.70977	0.739409	1.03183	2.79281	1.25072
Plcxd2	6.68508	1.12768	2.34547	0.289432	0.231527
5430435G22Rik	6.67264	11.2881	0.330528	0.47383	2.54518
Ptgs2os2	6.65722	0.841848	0.843391	0.324104	0.218292
Pcyt1b	6.6549	4.18476	1.09877	1.01228	0.471409
Fam46b	6.50916	1.53553	27.7447	8.38819	0.205442
Zfp827	6.47151	9.69008	1.4411	2.25885	2.20687
Lrrc27	6.46963	2.77769	1.9192	1.45012	12.563
Lin9	6.45703	1.71752	0.767158	2.19657	4.59352
Iqgap3	6.45315	1.42783	0.432422	2.13593	0.75451
Tfpi2	6.42953	0.840084	1.8911	0.178735	1.19601
Klf7	6.36383	3.72463	0.737248	1.0018	2.32731
Lyz2	6.3525	12.7573	6.68659	1.17094	2.15089
Orc1	6.32395	1.14991	1.34112	1.56528	0.762372
Exo1	6.2872	1.04947	1.01829	2.46818	0.778701
Dtna	6.28108	2.14684	0.296821	0.14201	0.110594
BC030867	6.28044	1.6393	0.840626	1.62287	1.20287
Tuft1	6.24664	1.88451	0.820396	1.61093	0.155694
Igfbp6	6.18798	4.70273	5.58974	34.277	0.422759
Rnf128	6.15807	0.566177	1.30896	2.09254	6.40238
Ica1	6.11495	3.01579	0.905437	1.26972	0.798037
Tnfaip3	6.10264	1.67506	0.458372	1.33044	2.52589
Kif15	6.09299	1.19026	0.753984	2.22037	0.968103
Tm7sf2	6.04114	4.38639	1.96024	2.742	17.7045
Cenpf	6.03025	1.73234	0.867151	2.09382	1.3313
Dock11	6.02458	4.9308	0.820153	4.04573	12.2455
Lrch2	6.00367	4.4276	1.30884	1.57121	0.627421
Inhbb	5.94856	1.3522	0.477153	0.575383	4.56737
Sorcs2	5.88156	9.94463	7.85604	1.04416	1.15857
Dhx32	5.85714	4.42254	1.80398	4.10267	23.1423
Slc25a33	5.8468	3.05003	6.8124	4.89597	20.631
Map2k3os	5.83511	1.22035	1.56742	1.1589	1.43836
Tiam1	5.83306	1.62059	4.18131	0.593331	1.72664
Adam8	5.82815	2.37361	12.6224	4.8299	0.399821
Ank3	5.80562	4.64966	16.3646	3.34506	0.558449
2700099C18Rik	5.75827	2.17311	1.19095	1.51892	0.941006
Pik3r5	5.74641	1.31973	3.0076	1.88148	0.221335
Gcnt4	5.71443	2.68204	2.92999	0.299557	0.26262
Echdc3	5.68041	5.66535	0.994773	3.33379	14.5487
Mastl	5.67052	1.56208	0.614388	1.34002	1.40949
Megf10	5.60931	2.60699	1.86924	0.113881	0.447658
Ogdhl	5.59314	10.839	1.99239	2.46271	1.84247
Rassf5	5.59016	3.98991	1.83238	0.800981	1.0796
Grik5	5.59003	19.7583	2.67786	4.92049	6.32013
Hrct1	5.52756	1.13838	0.657963	5.1653	10.9544
Kntc1	5.48575	1.57871	0.409376	2.13876	1.20395
Spire2	5.44307	4.84777	0.579168	1.47014	1.4077
Stbd1	5.43487	1.4892	0.430364	0.149564	6.33601
Arhgap28	5.42845	16.037	3.14946	6.34567	2.24389
Runx1	5.40118	0.934866	3.06244	0.271975	0.363481
Apln	5.38349	3.87793	0.622603	2.35256	36.8564
Fam110c	5.37652	0.40918	4.5813	11.3557	17.2255
Lrrc8d	5.34313	4.38771	14.0914	3.3128	23.8891
Aspm	5.33041	1.74859	0.831287	1.93342	1.16483
Samd5	5.25161	3.1837	5.70218	1.10458	0.520596
Casc5	5.24671	1.13115	0.653783	1.87539	1.28215
Lmod1	5.24302	1.66595	0.347709	0.739365	0.302715
S100a3	5.23213	0.794339	0.393525	0.655315	1.08336
Klk10	5.21591	0.0501351	0.231817	0.260572	0.585004
Gbe1	5.2154	3.33448	3.73483	3.58811	64.0311
Tpd52l1	5.19389	1.89832	1.06585	1.00229	0.834247
Rpusd3	5.18414	4.33088	3.06638	26.9486	17.8596
Pfkfb1	5.129	2.34761	0.477619	1.32318	37.7129
Dusp3	5.12322	2.17002	0.667341	0.316412	1.23125
Gsg2	5.08574	1.12797	0.626381	2.01803	1.43114
Ifi27l2b	5.07942	0.0540432	0.0499775	0	0.137587
9130008F23Rik	5.07323	2.32993	4.14224	1.19222	0.516207
Abhd1	5.03006	1.45714	5.82679	2.51701	31.5179
Bex2	5.00437	3.73739	1.09797	1.33552	0.350456
Rnu73b	0	266.165	102.559	0	0
Scarna2	0	260.372	0	0	0
Rmrp	2.60758	81.6082	1.69975	2.54744	8.18888
Nrep	2.08841	67.1609	4.10171	16.3223	37.7266
Rprl3	1.0272	53.5796	1.33916	1.67252	9.8311
Isg15	2.37672	48.4313	11.4987	3.04562	3.10188
Gas2	10.9143	38.076	3.84457	2.98002	6.18587
Ifit1	1.57535	36.6411	1.11588	0.642966	0.606233
Rpph1	1.52431	34.9295	1.21944	1.2184	5.7195
Fxyd1	0.100782	34.2148	22.8978	1.21893	51.7728
Clec3b	0.475726	32.4476	14.758	4.73205	25.6886
Trib3	13.7476	31.264	4.14987	3.24495	54.9535
Oasl2	0.488241	30.5605	1.4208	0.249847	0.375496
Renbp	30.6588	29.7747	9.35613	3.94955	4.12651
Pdpn	34.8331	28.9522	46.6958	3.21891	2.81735
Ppp1r3c	0.399847	28.3048	3.27597	19.7737	81.3907
Ifit3	0.921413	28.296	1.04954	0.12992	1.41485
Pcdh18	14.0073	28.2061	2.86004	2.56245	3.75815
Stat1	4.54292	28.2012	6.41686	11.8936	0
Mfap4	0.260365	28.0794	16.0129	2.41642	5.63013
Ccl2	208.37	27.4838	9.90742	4.53472	2.53956
Irf9	4.07978	27.3441	5.86195	3.37537	3.71246
Sema3f	4.54239	26.2248	8.49618	3.75894	5.93615
Cdon	2.2707	25.8901	3.05697	15.2006	12.4862
Irgm1	8.9883	24.4448	2.20907	3.19309	2.56987
Dbp	2.6644	23.1017	0.790046	0.970253	31.4485
Calml4	2.37607	22.7328	10.6078	3.28409	4.74249
Srpx2	3.13539	22.3969	10.7072	3.71076	7.15633
Stat2	2.44854	22.3142	4.82402	3.29009	4.7735
Appl2	3.2061	21.8301	4.41349	6.17118	13.8238
Ddx58	4.61029	21.6943	2.85166	3.9313	4.22375
Scrn1	12.1336	21.4978	2.37278	3.23862	3.09113
Grem1	106.023	21.4757	11.1004	4.94221	1.6196
Thbs3	7.24239	20.8748	13.2548	4.99635	2.47408
Mapk8ip1	4.78171	20.5833	3.75987	6.23465	5.92596
Fas	8.50713	20.3465	1.87156	6.10334	4.15051
Dnm3os	2.83164	20.3356	6.09839	6.28413	4.8722
Itgbl1	2.67537	19.994	12.5532	2.18063	3.30957
Osr2	0.565775	19.7933	1.70385	5.99155	5.13739
Grik5	5.59003	19.7583	2.67786	4.92049	6.32013
Usp18	1.131	19.5932	1.1484	1.3599	4.00068
Actg2	122.761	19.227	20.606	1.00395	1.59642
Iglon5	2.41084	19.1389	6.56527	5.58608	3.51484
Hic1	4.875	19.1358	3.69136	11.1038	2.54918
I830012O16Rik	0.480438	19.041	0.598712	0.0920309	1.23407
Trim30a	2.00242	18.7983	2.01866	3.21215	2.29839
Dzip1	4.42809	18.677	4.5325	7.69321	2.82774
C1s2	0.76265	18.4437	11.4092	2.83123	4.2924
Rtp4	0.547701	18.0887	1.04671	0.559391	1.63066
Tor3a	2.64751	17.8776	3.36091	6.39006	11.5881
Slc38a4	40.4567	17.8487	13.9189	4.1712	1.96062
Zfp57	21.9469	17.8242	10.9165	2.03913	2.33846
Pik3ip1	1.11995	17.2495	1.24215	7.9201	4.61946
Chac1	15.5304	17.0858	2.24604	3.17104	16.0183
Rasa4	33.4677	16.9831	7.48639	2.93827	2.95622
Slc27a1	4.29381	16.6814	1.53346	10.9337	23.821
Arhgap28	5.42845	16.037	3.14946	6.34567	2.24389
Ptgfr	1.14154	15.9505	2.93687	28.7372	8.85029
Tnc	40.848	15.9372	27.684	3.66981	1.76508
Nrbp2	0.788141	15.8487	4.89999	6.6246	11.9418
Pml	18.7495	15.7943	4.0982	5.57272	3.59707
Tes	64.0395	15.6643	20.8919	4.12124	1.44846
Elk3	27.758	15.4596	4.15963	5.08975	3.93095
Akr1c14	2.038	15.4503	0.49074	7.01308	5.13105
Arhgap20	0.829985	15.4186	1.75796	3.82597	4.25442
Parp9	2.2381	15.2732	2.25457	3.39537	7.78221
3300005D01Rik	50.1171	15.2515	8.04969	2.87159	4.84196
Igf1	2.16872	15.146	5.45682	4.62199	20.352
Ppp1r3d	1.56246	14.8964	1.32039	3.45626	17.9247
Nrg1	20.631	14.6954	6.72122	4.0328	2.75376
Pawr	19.1189	14.3434	1.64162	2.00927	3.16354
Matn4	0.685026	14.1938	7.26101	2.3454	1.65885
Dyrk1b	3.70581	14.1763	2.06349	8.85204	19.6032
Mr1	3.41573	14.1709	1.99521	2.71579	7.42982
Ifi44	0.100839	14.0941	1.3434	1.21911	0.237508
Tap1	2.26676	13.9897	3.0494	4.37143	4.86603
Acot2	3.55822	13.7165	1.55903	2.46861	21.6043
Gpr149	25.4868	13.7154	3.19218	8.42015	2.22629
Gstt1	1.47283	13.5307	3.1602	1.35893	7.52528
Tap2	1.59533	13.4058	2.38354	5.76076	10.428
Pak1	33.8094	13.0981	10.7199	2.61067	2.78311
Runx1t1	4.12591	13.0732	1.25644	2.08742	2.42996
Mmp9	0.355757	13.0074	6.64281	0.796008	0.525147
Syngap1	2.72656	12.9883	2.138	2.70727	2.84683
Gbp2	1.16589	12.9547	2.08748	0.480747	10.5154
Serpinb8	4.39019	12.8811	0.504948	1.38802	3.69878
Irf7	0.655848	12.799	1.30138	0.512577	1.35762
Lyz2	6.3525	12.7573	6.68659	1.17094	2.15089
Pla2g7	13.1835	12.738	6.58321	1.30384	0.536196
Timp3	17.7312	12.6282	23.1434	1.24209	0.860712
Tmem173	17.5651	12.4817	3.81317	4.13048	2.16892
Phyh	2.30789	12.4732	2.62394	4.08986	12.4006
Apobr	3.18252	12.4661	2.99398	1.09849	5.63002
Myo1e	21.4725	12.2327	12.8714	4.40594	1.29745
Bbc3	3.00051	12.2019	0.8651	4.67883	10.769
Ccdc136	2.98607	12.1368	1.62219	2.15191	1.61786
Cplx2	8.92025	11.9915	3.56307	2.30641	1.8851
Ackr3	2.62319	11.8348	29.4296	8.0526	2.03652
Cd109	21.6798	11.7298	17.5433	2.91061	1.30151
Tagln	267.097	11.5087	18.255	2.07988	3.5748
Tcea3	1.27435	11.4701	0.57509	0.223455	1.58321
5430435G22Rik	6.67264	11.2881	0.330528	0.47383	2.54518
Cdh26	3.30728	11.1978	0.832965	1.99707	1.59722
Rnu11	0	11.0539	0	0	0
Smarca1	2.20386	10.9065	3.07965	2.21406	1.9214
Ngf	60.1944	10.8973	4.19848	2.15544	1.02469
Bmf	0.184698	10.8708	0.617023	16.7131	4.70926
Ogdhl	5.59314	10.839	1.99239	2.46271	1.84247
Stat5a	3.51854	10.8029	4.44247	32.3824	18.6861
Pcgf5	18.5948	10.8023	2.45144	2.52588	22.4372
Klhl24	1.46776	10.7509	0.776724	4.2709	9.77813
Bdh2	3.58216	10.7416	0.857286	0.521379	2.49726
Fblim1	32.4991	10.7103	2.86123	1.90474	1.88006
Plekho1	30.0057	10.5668	4.85129	3.66421	1.08646
Lrrk1	16.1774	10.3234	3.75103	2.90732	2.05433
H19	0.579603	10.3176	14.2717	67.7066	2.42904
Fmod	0.141213	10.3049	6.33885	0.200664	1.02516
Btg2	4.30931	10.2141	3.02124	4.70725	21.7973
Cd74	0.334451	10.2126	6.43234	0.391632	0.86977
Ndrg4	8.87833	10.1988	2.34083	1.50408	1.28716
Mertk	1.22056	10.1951	16.8373	9.78768	3.91519
Ces1a	0.576047	10.1889	4.07725	1.01297	0.465178
Cxcl5	15.2141	10.1489	4.17705	1.53639	0.947745
Dclk2	2.50294	10.0781	1.16276	3.59714	2.15758
Hdac11	0.893014	10.0777	0.844059	5.61256	5.2483
Igtp	0.459059	10.0085	0.421375	0.65898	2.05107
Sorcs2	5.88156	9.94463	7.85604	1.04416	1.15857
Clu	0.424968	9.93908	7.77027	3.03072	11.7252
Fkbp1b	3.11807	9.91822	2.49054	2.23099	1.93082
Itgb3	2.59838	9.88501	29.8605	13.7373	2.66605
Trim12c	1.60983	9.87191	1.12292	1.78374	2.32867
Irgm2	0.499419	9.79069	0.313239	0.553289	1.44688
Pdk2	1.72154	9.75911	1.11679	7.24483	29.6012
Sgcd	11.0943	9.72186	3.79251	3.48278	30.2728
Zfp827	6.47151	9.69008	1.4411	2.25885	2.20687
Zfp41	1.99517	9.59874	0.500245	1.41949	2.35929
Apol9a	1.34074	9.50088	0.453396	0.0654848	0.404515
Ypel4	0.373101	9.36246	1.70244	3.34122	2.62236
Iigp1	0.103811	9.32304	0.255791	0.302225	6.77226
Ajuba	30.5338	9.26904	7.03267	2.96829	1.30855
Aoc3	1.53672	9.24331	2.95345	4.10271	137.916
Ltc4s	1.15351	9.23158	2.42925	31.9867	115.999
Ppef1	3.33652	9.1943	1.14109	0.42389	1.63782
Lpar4	0.769073	9.1645	0.636289	11.1627	11.1016
Dhx58	0.478525	9.11365	0.649006	0.844495	0.969525
Nmnat2	4.68856	9.1117	39.948	16.7995	4.82566
Nkain1	27.0867	9.04914	7.21019	1.94282	1.41968
Lum	0.091082	9.01391	3.2595	10.6956	57.4685
Dtx3l	1.31006	9.00738	0.858018	1.77146	3.2153
Fam13a	0.383438	8.96496	0.766131	12.101	46.1916
Lrrn4cl	1.34782	8.94147	4.30387	1.20279	1.85294
Sp100	1.19482	8.93351	0.818639	0.568014	0.772098
Gbp3	0.305577	8.86712	0.821173	0.145789	1.81624
Mettl7a1	2.10098	8.82837	0.896474	3.6886	14.0884
Glt8d2	2.23839	8.8082	3.35135	1.33256	1.14543
Slc40a1	0.976587	8.75974	0.178384	0.964549	2.88875
Tmem37	3.26962	8.75778	1.10663	1.31045	4.47578
Nmi	1.31946	8.73632	0.943999	2.34226	4.18673
Dusp5	26.8056	8.66931	12.1938	4.2712	3.69777
Tlr2	2.76424	8.60216	1.40797	1.36908	2.0188
Stc1	0.423764	8.59446	0.640351	1.7971	12.703
Ifi47	0.91246	8.5173	0.153161	0.218617	0.441739
Lpcat2	0.131293	8.479	4.62148	3.28358	0.753945
Serpinb1a	0.782138	8.46589	1.37396	2.78767	2.80415
Apol9b	0.863492	8.43705	0.412325	0.0643701	0.271982
Glis1	1.90616	8.40334	27.7676	6.33888	3.12616
Gata2	3.23006	8.34825	1.5901	0.712195	0.332086
Zfp467	1.35792	8.33093	0.24203	4.68922	16.3975
Flrt2	30.7619	8.3192	10.8713	2.29946	1.61944
Gdpd2	0.0712745	8.19913	4.57168	5.59831	4.14408
Gbp6	0.0815084	8.13306	0.32419	0.328232	4.54498
Npy1r	8.47516	8.12191	1.36827	1.12291	0.1884
Tmem53	1.93973	8.05358	2.73907	9.64608	27.8509
P2rx3	0.88153	8.03935	2.72631	1.065	15.7138
Mccc2	4.84617	7.95805	4.89466	8.23752	26.5675
Crebrf	1.02974	7.91861	0.868925	4.18014	4.49315
Fam69a	3.24953	7.85403	1.53343	2.30253	17.0509
Hsdl2	4.39467	7.84088	3.8065	10.5331	38.8231
Dbf4	35.0115	7.80985	4.6423	6.80224	3.67253
Zbp1	0.383334	7.69173	1.40843	0.152743	1.36245
Olfm1	3.48881	7.63681	1.19785	0.316742	0.830314
Htra3	1.13439	7.61027	0.956058	5.03932	7.59958
Procr	12.6627	7.60619	10.1767	2.27948	1.41139
Cnnm2	2.03885	7.57553	3.47551	12.7803	17.0454
Fam13c	2.03687	7.55003	0.396596	1.51824	3.72505
Mamdc2	3.12128	7.45127	2.79669	0.38249	0.712348
Itprip	27.8548	7.41393	10.1233	2.05659	1.03029
Rgs16	13.7548	7.35954	0.969586	0.57813	2.97061
Frmd4a	24.8742	7.29144	6.53646	2.58541	2.45613
Slc38a6	3.22629	7.25547	1.33284	4.65183	14.9877
Acsl3	9.48558	7.18765	4.87222	3.67013	24.5997
Hoxd4	1.30255	7.16148	1.50002	5.2173	9.1031
Fam214a	1.26116	7.15304	1.45889	12.1624	10.43
Chaf1b	31.7693	7.13553	2.67146	7.89065	3.48935
Zfp423	0.275401	7.09266	1.10546	3.62509	7.6798
Ptprv	0.208824	7.00403	1.39524	0.821698	0.34351
Pknox2	1.13578	6.99236	1.73817	1.37774	1.65167
Wbscr27	1.15404	6.98835	0.423147	1.40929	5.75396
Gtse1	30.8456	6.94176	4.97774	7.15673	3.04643
Parvb	32.0591	6.90902	9.41442	1.75003	1.97418
Rnaseh2b	13.7088	6.90216	2.10104	3.45445	3.19712
Aifm2	4.46269	6.88005	3.87751	31.6463	44.6006
Xaf1	0.512614	6.87131	0.637249	0.0949729	0.730535
Fam131b	11.5446	6.87006	2.97373	0.766159	0.373914
4930404N11Rik	3.60882	6.86818	4.47861	15.1194	33.875
Rerg	0.432412	6.84471	0.100322	0.47445	0.768602
Lrrc49	2.67928	6.81913	1.02215	1.58534	1.70724
Nr1d2	7.83726	6.81764	0.924074	1.5238	8.44537
Steap1	48.2585	6.77952	27.8242	3.78349	2.47777
Sirpa	3.60543	6.76655	17.0028	3.60622	2.12617
Trim16	16.2943	6.76244	9.36068	1.13639	1.32535
2810025M15Rik	16.3197	6.75473	2.96719	5.86967	2.59634
Apba1	0.779474	6.73896	2.18793	1.07749	2.46928
Prelid2	7.66713	6.70697	1.92223	3.71314	23.2842
Irak2	15.7295	6.66984	1.73933	3.55191	7.42411
Lst1	4.01641	6.65868	4.08421	0.470853	0.144151
Optn	4.18134	6.64291	2.06683	1.07021	10.2585
Rin1	23.2759	6.63555	15.7309	4.68414	1.76474
Trnp1	1.29277	6.6206	4.73439	0.711848	0.717062
Fam198b	12.5202	6.61091	2.93041	1.88881	2.55634
Trim30d	0.166021	6.57256	0.187635	0.557212	0.665627
2210408F21Rik	3.74336	6.55262	0.966209	2.04837	8.76356
Rgs3	2.12242	6.54394	0.349018	2.44981	3.44517
Aldh3a1	0.465532	6.53156	4.74276	33.8771	0.901044
Hs6st2	13.1677	6.52738	3.60301	1.23983	1.27167
Bcat1	32.5206	6.52537	21.6183	2.11601	0.675802
Vash2	7.84046	6.51675	1.46193	1.09068	1.04276
Steap2	19.1097	6.50463	10.0583	4.31071	1.27649
Ptpn21	13.1618	6.4679	1.41817	2.26837	3.19586
Enho	1.66646	6.4675	4.44097	0.925743	0.762286
Lgals7	0.4335	6.45351	5.34069	4.31972	0.233377
Gm24148	7.52738	6.36705	22.0802	0	3.37701
Ndrg1	0.774052	6.31121	6.20366	3.48348	12.1258
Slc8a1	1.33204	6.29372	0.240848	0.803805	1.6576
Gbp7	0.242991	6.2733	0.265336	0.243554	1.65656
Ncoa1	2.62633	6.24362	2.52585	11.366	19.3864
Epb4.1l4a	18.0415	6.23376	7.8453	1.30491	0.561529
Scarna3b	0	6.22868	0	0	0
Notch1	0.52862	6.20399	1.19885	8.98012	5.35904
Samd4	11.0319	6.16089	2.40617	1.01805	3.51893
Parp14	0.488515	6.14499	0.39253	0.472523	0.924389
Tmem158	1.87241	6.12773	1.91797	1.06705	1.38003
Pi16	0.200391	6.11616	23.3001	8.76067	1.30357
Psmb8	0.200672	6.11058	1.34078	0.555457	2.22067
Lrrc8c	17.5677	6.06248	21.2144	2.76529	2.01549
Bdnf	34.6465	6.04643	12.1002	4.14125	0.905585
Ccdc74a	3.96659	6.03927	1.61342	1.30204	0.768759
Oas2	0.0372505	6.02204	0.427964	0.0181957	0.208896
Loxl4	32.1946	6.00313	4.46682	1.55974	1.10506
Col23a1	0.00624146	5.99382	3.26801	1.91462	1.81447
Cebpa	0.574415	5.97447	3.20641	34.8445	96.5865
Mx2	0.0230762	5.96606	0.360603	0.0300586	0.303951
Tlr3	1.4219	5.96465	0.38799	1.39719	2.73707
Lrrc61	1.30233	5.92991	1.19959	3.29972	8.12976
Pyroxd2	0.339084	5.8451	1.06324	2.18177	9.70443
Fam64a	32.8394	5.80215	2.08606	4.66983	3.24702
Ypel2	0.32648	5.79922	0.893823	6.28686	9.19498
Cers1	0.648577	5.79663	0.994738	1.56196	1.53682
Specc1	33.648	5.78553	1.80018	1.8112	2.01861
Plekhn1	2.32771	5.76297	1.57823	0.829936	0.747003
Flt3l	0.547798	5.7277	0.423937	1.52488	3.33521
4930503L19Rik	9.68439	5.70508	2.34732	1.89859	1.83167
Atad2	20.8573	5.67148	2.73097	6.10787	4.15096
Echdc3	5.68041	5.66535	0.994773	3.33379	14.5487
Cenph	22.3254	5.65405	2.28594	8.94295	4.90451
Crim1	25.7248	5.61927	4.86841	2.55835	3.63239
Masp1	10.3	5.58943	11.6144	2.40453	0.828159
Rpl26	27.1088	5.58715	3.17935	3.21764	10.2273
Arsj	2.52258	5.56588	6.41482	15.7893	1.93004
Il17rd	0.748675	5.52183	0.520874	0.96083	0.954512
C1rl	1.83416	5.50089	0.43944	2.71745	7.36068
Smc2	22.5379	5.48437	4.46147	6.65808	4.2281
AU021092	13.6851	5.45457	3.50927	1.88141	1.09962
Gadd45b	19.4152	5.42889	12.8336	2.94701	1.03659
Asap3	0.83025	5.41104	0.644478	2.12785	1.34773
Phactr1	0.853928	5.3712	0.165184	0.705956	0.869612
Ccl9	16.8078	5.33978	1.64673	0.384494	2.30678
Gnb5	1.65272	5.30797	3.82559	17.5046	15.7192
Sycp2	0.0372985	5.30024	0.170191	0.327945	2.16974
Fhl1	86.8754	5.29448	2.76337	3.45978	17.5712
Rnf157	2.97119	5.27251	1.12312	0.576044	0.57716
Ifit2	4.23208	5.25795	0.204676	0.186718	0.955445
Myo1d	7.06316	5.25769	21.6958	3.03948	2.75595
Slc18b1	4.53187	5.24305	1.37856	4.92816	22.2968
Pold1	17.2749	5.2288	3.29124	7.38345	2.64983
Ehd3	3.45521	5.21918	34.8194	10.0694	2.14714
Tmem140	0.812739	5.21346	0.873988	1.05218	9.10631
Lipe	1.23798	5.17342	3.88297	89.9936	339.485
Arhgef19	1.73996	5.1466	0.970671	2.62796	0.823699
Sphk1	1.04061	5.14459	20.2797	28.2845	3.39718
Nfkbie	2.49053	5.1365	1.7888	1.2616	0.510383
C330027C09Rik	18.9226	5.12367	2.96138	6.20034	4.34806
Synm	0.23731	5.10419	3.65703	2.81191	0.880012
Acss2	2.70958	5.09821	1.99018	5.73655	45.2505
Sema5a	1.36919	5.09197	10.5516	8.29255	1.67881
Fam83d	21.0367	5.06195	4.06844	7.15823	4.09042
Echdc1	4.35745	5.06146	1.61595	6.77	78.5891
Mx1	0.061519	5.05503	0.561444	0.141637	0.248373
Ces2g	1.88284	5.00982	4.31461	19.7501	3.29241
Ano3	2.35333	5.00153	0.824303	1.0466	0.309926
Rnu73b	0	266.165	102.559	0	0
1810011O10Rik	1.48179	1.96959	87.3451	15.7465	2.95758
Ramp3	2.41279	0.36849	86.8958	1.60417	0.0902044
Ear12	0.235261	0.133093	86.3794	237.216	39.4166
Pip	0.0928398	0.314115	80.1554	187.021	0
Klf5	32.7826	3.3169	61.7636	45.9055	2.45289
Ear1	0.301853	0.349888	51.8579	391.163	47.6982
Bclaf1	0	0	48.3579	29.8308	14.1418
Ear2	0.54283	0.981424	47.3281	536.642	73.4339
Pdpn	34.8331	28.9522	46.6958	3.21891	2.81735
Epas1	1.37384	2.99758	45.4596	9.68672	21.4644
Gprc5a	39.9429	2.76401	43.5531	2.24714	0.0982793
Tead4	11.2336	2.39543	43.0122	14.4145	1.96837
Lcn2	0.525085	0.666216	42.9213	204.523	98.2793
Cd24a	10.3918	3.58571	42.1729	11.4018	1.41332
Il1rl1	87.0979	3.01361	40.0485	0.738359	0.194764
Nmnat2	4.68856	9.1117	39.948	16.7995	4.82566
Fgl2	0.210337	0.137479	37.3837	0.0747222	0.085785
Arl4d	1.88055	1.29701	36.0395	4.29617	0.285551
Ehd3	3.45521	5.21918	34.8194	10.0694	2.14714
Krt13	0.552667	0.727182	34.5244	22.4967	7.1077
Ctla2b	9.67523	3.19374	34.1927	18.5749	1.03905
[truncated: 845 more rows]

## Sheet: BA GO enrichment
	Category	Term	Count	%	PValue	Genes	List Total	Pop Hits	Pop Total	Fold Enrichment	Bonferroni	Benjamini	FDR
[truncated: 173 more rows]

[truncated: 12 more sheets: WA GO enrichment, Lineage specific coding genes, lncRNAs expression, BA stage specific lncRNAs, WA stage specific lncRNAs, Lineage specifc lncRNAs, lncRNAs annotation, Overlap lncRNA d7 Alvarez et al, BA stage specific miRNAs, WA stage specific miRNAs, BA expressed miRNAs, WA expressed miRNAs]
